# Supplementary material for: Developmental hourglass and heterochronic shifts in fin and limb development
Source: eLife. 2021 Feb 9;10:e62865. doi: 10.7554/eLife.62865 (PMC7932699; doi:10.7554/eLife.62865)
Supplement: Supplementary file 7. — The details of Figure 2A. [file elife-62865-supp7.xlsx]

## Sheet: trans-transcriptome_nonorm-inte
Onimaru et al., Supplementary file 8. Clustered gene expression table with phenotype annotation (related to Figure 2)
Column 0, gene name Column 1 to 4, TPM values of mouse forelimb buds Column 5 to 10, TPM values of bamboo shark fin buds Column 11, colors of clusters indicated in Figure 2A. The first three numbers separated by comma indicate RGB values. c1 to c15 are clusters numbered from left to right in Figure 2A. Column 12, cluster annotations indicated in Figure 2A. Column 13, phenotype information from MG…
	Mouse forelimb bud TPM values				Bmaboo shark fin bud TPM values
0:gene_name	1:E09.5	2:E10.5	3:E11.5	4:E12.5	5:st27	6:st27.5	7:st29	8:st30	9:st31	10:st32	11:cluster_rgb_color/cluster_number	12:cluster_annotation	13:phenotype_information
LOC102346417	-	-	-	-	0.09	0.27	0.23	0.46	1.13	2.2	0,0,0/c1	Fin-specific	no-mutants
CNIH3	0.16	0.09	0.15	0.42	0.05	0.2	0.22	0.27	0.68	1.4	0,0,0/c1	Fin-specific	probably-unrelated
LOC106706810	-	-	-	-	0.54	3.13	2.92	6.94	14.13	26.26	0,0,0/c1	Fin-specific	no-mutants
HEATR9	0	0	0	0	0.05	0.45	0.83	0.92	2.28	4.52	0,0,0/c1	Fin-specific	no-mutants
OTOS	0.04	0	0.06	0	0	1.74	1.76	3.05	15.06	27	0,0,0/c1	Fin-specific	probably-unrelated
LOC102346828	-	-	-	-	0	0.23	0.02	0.23	1.34	2.85	0,0,0/c1	Fin-specific	no-mutants
ABI3BP	0.03	0.04	0.17	0.71	0.07	0.21	0.88	4.2	7.49	17.07	0,0,0/c1	Fin-specific	probably-unrelated
LOC102358185	-	-	-	-	0	0.04	0.08	0.44	0.85	1.83	0,0,0/c1	Fin-specific	no-mutants
LOC102354121	-	-	-	-	0	0.03	0.15	0.55	0.55	2.05	0,0,0/c1	Fin-specific	no-mutants
ARHGAP30	0.03	0.2	0.4	0.9	0.06	0.16	0.19	0.17	0.22	1.14	0,0,0/c1	Fin-specific	no-mutants
LOC102358708	-	-	-	-	0.03	0	0.39	0.38	0.33	1.73	0,0,0/c1	Fin-specific	no-mutants
HHATL	0	0	0.02	0.25	0.1	0.28	0.81	1.14	0.99	4.7	0,0,0/c1	Fin-specific	no-mutants
CPLX1	0.19	0.11	0.25	0.28	0.15	0.43	0.73	0.73	0.53	3.45	0,0,0/c1	Fin-specific	probably-unrelated
6430571L13RIK	0.15	0.35	0.42	0.6	0.12	0.24	0.38	0.57	0.53	2.7	0,0,0/c1	Fin-specific	no-mutants
LOC103180671	-	-	-	-	0.05	0.25	0.5	0.5	0.99	3.1	0,0,0/c1	Fin-specific	no-mutants
NEUROG3	0	0	0	0	0	0	0.08	0.9	0.95	2.81	0,0,0/c1	Fin-specific	probably-unrelated
CHRNE	0	0	0	0.03	0.11	1.03	2.51	4.76	7.09	20.18	0,0,0/c1	Fin-specific	probably-unrelated
COL21A1	-	-	-	-	0.07	0.08	0.14	0.4	0.54	1.87	0,0,0/c1	Fin-specific	no-mutants
ALKAL2	-	-	-	-	0.22	0.66	0.42	0.84	1.9	6.66	0,0,0/c1	Fin-specific	no-mutants
LOC102349789	-	-	-	-	0.02	0.06	0.24	1.03	2.42	6.34	0,0,0/c1	Fin-specific	no-mutants
LOC103179914	-	-	-	-	0	0.15	0.38	1.18	1.63	5.01	0,0,0/c1	Fin-specific	no-mutants
ENTPD8	0.04	0	0	0	0.2	0.08	0	0.25	0.43	1.42	0,0,0/c1	Fin-specific	probably-unrelated
LOC102570695	-	-	-	-	0.8	41.62	147.35	351.29	164.91	1006.32	0,0,0/c1	Fin-specific	no-mutants
FBP2	0.13	0.17	0.37	0.77	0.02	0.39	2.09	3.37	2.54	11.53	0,0,0/c1	Fin-specific	probably-unrelated
LOC102352251	-	-	-	-	0.02	0.42	1.24	1.96	1.75	7.73	0,0,0/c1	Fin-specific	no-mutants
LRRC30	0.06	0	0.05	0.19	0	0.13	0.35	1.09	0.79	3.4	0,0,0/c1	Fin-specific	no-mutants
MYH2	0	0	0.01	0.03	0.02	0.88	3.14	6.18	5.08	20.79	0,0,0/c1	Fin-specific	no-mutants
MYBPC3	0.11	0.01	0	0	2.36	3.12	9.4	14.23	10.5	52.8	0,0,0/c1	Fin-specific	probably-unrelated
FHL5	0	0	0	0	0.03	0.45	1.04	1.87	1.49	6.59	0,0,0/c1	Fin-specific	probably-unrelated
LOC102350553	-	-	-	-	3.85	11.62	31.53	50.87	38.23	180.96	0,0,0/c1	Fin-specific	no-mutants
LOC102560173	-	-	-	-	0.07	0.16	0.08	0.51	0.76	1.96	0,0,0/c1	Fin-specific	no-mutants
LOC102357935	-	-	-	-	0.09	0.1	0.17	0.61	0.82	2.07	0,0,0/c1	Fin-specific	no-mutants
CLCA3A1	0.17	0.07	0.03	0.26	0.32	0.18	0.24	0.52	0.91	2.55	0,0,0/c1	Fin-specific	no-mutants
LOC103186230	-	-	-	-	0	0.49	0.87	0.97	1.98	4.98	0,0,0/c1	Fin-specific	no-mutants
KBP	-	-	-	-	1.17	1.01	2.04	3.13	5.8	13.72	0,0,0/c1	Fin-specific	no-mutants
LOC102361251	-	-	-	-	0.25	0.32	0.45	0.73	0.73	3.32	0,0,0/c1	Fin-specific	no-mutants
LOC103187940	-	-	-	-	0.75	1.07	1.73	2.23	3.14	11.9	0,0,0/c1	Fin-specific	no-mutants
CCN3	-	-	-	-	0.42	0.56	0.62	0.44	1.1	4.51	0,0,0/c1	Fin-specific	no-mutants
LOC109283280	-	-	-	-	0.19	0.22	0.32	0.24	0.56	2.29	0,0,0/c1	Fin-specific	no-mutants
TCF21	0.89	0.06	0.07	0	1.04	1.87	3.29	3.27	2.01	12.87	0,0,0/c1	Fin-specific	probably-unrelated
ATP2B2	0.01	0.01	0.02	0.16	0.35	0.92	0.64	1.32	1.37	6.52	0,0,0/c1	Fin-specific	probably-unrelated
LOC112532818	-	-	-	-	0.14	0.51	0.43	0.38	0.7	2.75	0,0,0/c1	Fin-specific	no-mutants
LOC103176988	-	-	-	-	0.58	2.1	1.33	2.89	4.04	13.66	0,0,0/c1	Fin-specific	no-mutants
LOC102362627	-	-	-	-	0.04	2.3	5.04	11	12.8	37.46	0,0,0/c1	Fin-specific	no-mutants
OTOG	0	0.03	0.05	0.13	0	0	0.15	0.22	0.23	1.26	0,0,0/c1	Fin-specific	probably-unrelated
MYLK2	0.02	0	0	0	0	0.07	0.29	0.29	0.07	1.48	0,0,0/c1	Fin-specific	probably-unrelated
LOC103181922	-	-	-	-	0.05	0.22	0.92	1.36	0.98	6.68	0,0,0/c1	Fin-specific	no-mutants
SPEGNB	-	-	-	-	0.5	1.25	1.67	2.36	1.42	13.01	0,0,0/c1	Fin-specific	no-mutants
LRRC14B	0	0	0	0.02	0	0.05	0	0.21	0.31	1.45	0,0,0/c1	Fin-specific	no-mutants
ALDH1A1	0.84	0.11	0.22	0.1	0.05	0.18	0.35	0.21	1.26	4.07	0,0,0/c1	Fin-specific	probably-unrelated
MPL	0.07	0.38	0.97	0.38	0.1	0.23	0.12	0.25	0.76	3.24	0,0,0/c1	Fin-specific	probably-unrelated
LOC102571382	-	-	-	-	0.45	0.2	0.51	0.81	0.53	4.11	0,0,0/c1	Fin-specific	no-mutants
CRYBB1	0	0.05	0.25	0.81	0.04	0.09	0.18	0.27	0.42	1.67	0,0,0/c1	Fin-specific	no-mutants
LOC102354037	-	-	-	-	0.06	0.5	0.35	0.98	1.58	6.03	0,0,0/c1	Fin-specific	no-mutants
R3HDML	0	0.04	0	0	0.04	0.06	0.13	0.57	1.24	3.68	0,0,0/c1	Fin-specific	no-mutants
MYMK	-	-	-	-	0	0.13	0.39	0.73	1.7	5.7	0,0,0/c1	Fin-specific	probably-unrelated
CILP	0.05	0.04	0.14	0.46	0.12	0.4	1.1	3.63	6.65	23.69	0,0,0/c1	Fin-specific	no-mutants
SPDEF	0	0.02	0.1	0	0	0	0	0.26	0.27	1.16	0,0,0/c1	Fin-specific	probably-unrelated
MYL5	-	-	-	-	0.37	4.71	4.34	6.2	15.83	199.82	0,0,0/c1	Fin-specific	no-mutants
PI15	0.13	0.05	0.05	0.11	0.1	0.11	0.12	0.1	0.3	4.54	0,0,0/c1	Fin-specific	no-mutants
UCMA	0	0.14	0.43	0.12	0.21	1.07	1.01	1.14	1.74	13.35	0,0,0/c1	Fin-specific	no-mutants
LOC102359843	-	-	-	-	0.63	0.83	0.22	0.39	0.24	11.13	0,0,0/c1	Fin-specific	no-mutants
KCNH5	0	0	0.1	0.1	0.14	0.17	0.06	0.06	0.18	1.85	0,0,0/c1	Fin-specific	probably-unrelated
SLC32A1	0.02	0.01	0	0	0	0	0.06	0.03	0.06	1.6	0,0,0/c1	Fin-specific	probably-unrelated
GADL1	0.02	0.02	0.09	0.18	0.11	0.22	0.65	0.39	0.19	8.07	0,0,0/c1	Fin-specific	no-mutants
SCGN	0.05	0.03	0.03	0.03	0.24	0.4	0.65	1.24	2.09	10.54	0,0,0/c1	Fin-specific	no-mutants
LOC103188861	-	-	-	-	0.07	0.08	0.24	0.09	0.39	2.03	0,0,0/c1	Fin-specific	no-mutants
ABRA	0	0	0	0.52	0.07	0.08	0.92	1.51	0.73	7.75	0,0,0/c1	Fin-specific	probably-unrelated
MYH4	0	0.02	0.01	0.34	0.92	6.68	19.84	44.58	32.77	278.88	0,0,0/c1	Fin-specific	hindlimb paralysis
NT5C1A	0	0	0.04	0	0.03	0.27	0.56	0.73	0.56	5.25	0,0,0/c1	Fin-specific	no-mutants
RASD1	0.6	0.62	0.69	0.75	0.13	0.32	0.16	0.17	0.16	2.29	0,0,0/c1	Fin-specific	probably-unrelated
LOC102358613	-	-	-	-	0.04	0.38	0.61	1.28	1.39	8.49	0,0,0/c1	Fin-specific	no-mutants
LOC102350139	-	-	-	-	0.17	13.64	32.54	72.85	71.35	468.75	0,0,0/c1	Fin-specific	no-mutants
CDKN1AL	-	-	-	-	0.11	0.27	0.37	0.41	1.79	7.75	0,0,0/c1	Fin-specific	no-mutants
LOC102366034	-	-	-	-	0.15	0.22	0.42	0.71	0.93	6.41	0,0,0/c1	Fin-specific	no-mutants
ADIPOQ	0.03	0	0.04	0.04	0.33	1.16	2.71	4.42	4.9	37.29	0,0,0/c1	Fin-specific	probably-unrelated
CEACAM2	0.01	0	0	0	0.05	0.09	0.38	0.43	0.82	5.43	0,0,0/c1	Fin-specific	probably-unrelated
LOC102562053	-	-	-	-	0.03	0.07	0.11	0.27	0.58	3.28	0,0,0/c1	Fin-specific	no-mutants
LOC102347050	-	-	-	-	0.02	0.01	0.35	0.1	1.28	6.74	0,0,0/c1	Fin-specific	no-mutants
AHRR	0.16	0.22	0.43	0.55	0.37	0.79	0.97	1.16	2.29	3.8	0,0,0/c1	Fin-specific	probably-unrelated
DPT	0.47	0.12	0.32	0.92	0.5	5.29	18.24	26.67	35.03	65.4	0,0,0/c1	Fin-specific	probably-unrelated
HTRA4	0.06	0.05	0.02	0.09	1.04	3.43	6.72	10.09	21.47	33.68	0,0,0/c1	Fin-specific	probably-unrelated
KCNN2	0.17	0.23	0.35	0.45	0.09	0.16	0.25	0.46	0.78	1.56	0,0,0/c1	Fin-specific	probably-unrelated
GALNT15	0.01	0	0.02	0.06	0.11	1.21	2.33	2.39	4.87	8.41	0,0,0/c1	Fin-specific	no-mutants
THPO	0.09	0.03	0.07	0.05	0.18	0.21	0.38	0.64	2.34	3.51	0,0,0/c1	Fin-specific	probably-unrelated
FOXI1	0	0	0	0	0.04	0.13	0.05	0.29	0.6	1	0,0,0/c1	Fin-specific	probably-unrelated
CLEC3A	0	0	0.03	0.03	6.64	8.44	8.59	16.77	38.95	51.46	0,0,0/c1	Fin-specific	no-mutants
MFRP	0	0	0.01	0.01	0.08	0.46	0.44	1	2.15	3	0,0,0/c1	Fin-specific	probably-unrelated
ERP27	0	0	0.18	0.32	0.07	0.14	0.19	0.66	1.36	2	0,0,0/c1	Fin-specific	no-mutants
LOC102353628	-	-	-	-	0.16	0.34	0.86	1.38	2.4	3.06	0,0,0/c1	Fin-specific	no-mutants
LOC106702396	-	-	-	-	0.11	0.4	0.74	1	1.86	2.42	0,0,0/c1	Fin-specific	no-mutants
LOC103174898	-	-	-	-	2.07	8.94	66.73	96.21	278.29	315.19	0,0,0/c1	Fin-specific	no-mutants
LAMB4	-	-	-	-	0.29	0.75	1.4	2.48	4.21	5.3	0,0,0/c1	Fin-specific	no-mutants
LRP1B	0	0	0	0.05	0.22	0.73	1.34	3.4	6.39	7.21	0,0,0/c1	Fin-specific	embryonic lethality, complete penetrance
LOC102354444	-	-	-	-	2.26	4.57	16.77	22.08	41.09	51.87	0,0,0/c1	Fin-specific	no-mutants
LOC102691832	-	-	-	-	1.15	4.45	37.22	52.32	164.23	175.92	0,0,0/c1	Fin-specific	no-mutants
LOC101748058	-	-	-	-	8.06	7.49	13.86	31.74	44.32	73.68	0,0,0/c1	Fin-specific	no-mutants
ANOS1	-	-	-	-	0.84	2.89	3.24	6.65	8.95	13.94	0,0,0/c1	Fin-specific	no-mutants
LOC103174764	-	-	-	-	0.19	0.72	0.18	0.96	1.71	2.19	0,0,0/c1	Fin-specific	no-mutants
LOC102345955	-	-	-	-	0.11	0.36	0.26	0.72	1.14	1.69	0,0,0/c1	Fin-specific	no-mutants
LOC102348479	-	-	-	-	0.18	0.33	0.46	2.09	2.65	3.98	0,0,0/c1	Fin-specific	no-mutants
CCN5	-	-	-	-	0.15	0.28	0.46	1.22	1.43	1.87	0,0,0/c1	Fin-specific	no-mutants
AKR1D1	0.01	0.01	0.02	0.02	1.01	1.69	1.81	3.17	5.12	6.55	0,0,0/c1	Fin-specific	probably-unrelated
LYG2	0.12	0.06	0	0	0.43	2.65	2.49	4.81	6.16	9.96	0,0,0/c1	Fin-specific	no-mutants
LOC103188098	-	-	-	-	0.25	0.74	0.71	1.48	1.85	2.7	0,0,0/c1	Fin-specific	no-mutants
OLFM4	0.12	0.21	0.29	0.35	4.75	9.34	5.84	16.54	25.81	34.86	0,0,0/c1	Fin-specific	probably-unrelated
GDA	0.45	0.06	0.02	0.04	0	0.41	0.04	0.93	2.02	2.08	0,0,0/c1	Fin-specific	no-mutants
LRAT	0	0.01	0	0.2	0.36	2.14	3.69	8.51	10.7	14.54	0,0,0/c1	Fin-specific	probably-unrelated
WDR17	0.27	0.38	0.42	0.39	0.38	0.39	0.64	1.43	2.62	2.99	0,0,0/c1	Fin-specific	no-mutants
CMYA5	0	0	0	0.03	0.16	0.29	0.61	1.95	2.93	3.81	0,0,0/c1	Fin-specific	no-mutants
EEF1A2	0.03	0.02	0	0.02	27.81	29.14	61.22	114.91	55.19	318.61	0,0,0/c1	Fin-specific	probably-unrelated
PAK5	-	-	-	-	0.13	0.32	0.53	0.95	0.72	2.85	0,0,0/c1	Fin-specific	no-mutants
LOC102361390	-	-	-	-	0.59	0.43	0.75	1.42	0.98	4.61	0,0,0/c1	Fin-specific	no-mutants
SNAI3	0.02	0.08	0.03	0.19	0.03	0.13	0.27	0.55	0.35	1.5	0,0,0/c1	Fin-specific	probably-unrelated
LOC102365645	-	-	-	-	0.4	1.13	3.76	5.34	4.66	17.96	0,0,0/c1	Fin-specific	no-mutants
LOC102575609	-	-	-	-	0	0.29	0.15	0.08	0.39	1.09	0,0,0/c1	Fin-specific	no-mutants
AMBP	0.03	0	0.03	0	0.11	1.13	1.61	1.16	2.09	6.83	0,0,0/c1	Fin-specific	probably-unrelated
MUC5AC	0	0	0	0.01	0	0.41	0.24	0.34	0.15	1.34	0,0,0/c1	Fin-specific	probably-unrelated
LOC102685451	-	-	-	-	0.05	3.55	0.38	6.92	5.59	18.02	0,0,0/c1	Fin-specific	no-mutants
LOC102352041	-	-	-	-	0.16	0.27	0.24	0.58	0.58	1.99	0,0,0/c1	Fin-specific	no-mutants
TENT5C	-	-	-	-	0.09	0.19	0.99	0.78	1.43	3.55	0,0,0/c1	Fin-specific	probably-unrelated
ALDH8A1	0	0	0	0.02	0.09	0.05	0.29	0.11	0.48	1.04	0,0,0/c1	Fin-specific	no-mutants
ASPA	0	0	0.2	0.76	0.4	1.02	0.98	1.65	2.8	6.89	0,0,0/c1	Fin-specific	probably-unrelated
PAX2	0.12	0.07	0.03	0.02	0.13	0.97	0.42	1.04	1.57	4.09	0,0,0/c1	Fin-specific	probably-unrelated
CUZD1	0	0.02	0	0.04	0.75	1.2	1.04	1.02	1.95	5.47	0,0,0/c1	Fin-specific	probably-unrelated
LOC103183043	-	-	-	-	0.19	1.29	1.23	1	0.82	3.83	0,0,0/c1	Fin-specific	no-mutants
DUPD1	0.03	0.11	0.52	0.59	0.02	0.17	0.67	0.86	0.63	2.37	0,0,0/c1	Fin-specific	no-mutants
NRL	0	0	0	0.02	0.79	1.22	1.63	2.29	2.29	8.2	0,0,0/c1	Fin-specific	probably-unrelated
ASB12	0.02	0	0	0.08	0	0.13	0.73	0.96	0.62	2.56	0,0,0/c1	Fin-specific	no-mutants
MYH1F	-	-	-	-	0.18	5.86	25.07	60.14	38.86	138.57	0,0,0/c1	Fin-specific	no-mutants
MYH1G	-	-	-	-	0.08	9.72	35.89	86.02	54.73	206.93	0,0,0/c1	Fin-specific	no-mutants
LOC103174880	-	-	-	-	0.15	0.27	0.74	1.22	0.75	2.94	0,0,0/c1	Fin-specific	no-mutants
MYH13	0	0	0.03	0.12	0	3.45	19.2	50.77	28.39	114.02	0,0,0/c1	Fin-specific	no-mutants
LOC103174953	-	-	-	-	0.11	0.39	1.21	0.93	1.14	3.96	0,0,0/c1	Fin-specific	no-mutants
LOC102574301	-	-	-	-	0.15	0.38	0.36	0.43	0.37	1.51	0,0,0/c1	Fin-specific	no-mutants
PTGER2	0.01	0	0.04	0.15	0.55	0.51	0.87	0.88	0.85	3.65	0,0,0/c1	Fin-specific	probably-unrelated
P2RY11	-	-	-	-	0.2	0.35	0.7	0.75	0.91	2.81	0,0,0/c1	Fin-specific	no-mutants
MINAR1	-	-	-	-	0.09	0.11	0.46	0.23	0.5	1.36	0,0,0/c1	Fin-specific	no-mutants
PYY	0.08	0	0	0	0.38	0.96	2.42	3.32	3.22	10.19	0,0,0/c1	Fin-specific	probably-unrelated
LOC102352967	-	-	-	-	0.3	0.16	0.7	1.09	1.07	3.43	0,0,0/c1	Fin-specific	no-mutants
LOC102562948	-	-	-	-	0.11	0.34	0.14	0.37	0.22	1.17	0,0,0/c1	Fin-specific	no-mutants
LOC107075793	-	-	-	-	0.05	0.33	0.61	0.54	0.8	2.42	0,0,0/c1	Fin-specific	no-mutants
KCNC2	0.01	0	0.03	0.03	0.43	0.35	0.66	0.25	0.7	2.09	0,0,0/c1	Fin-specific	probably-unrelated
LOC102352017	-	-	-	-	0	0.19	1.1	1.25	0.75	2.96	0,0,0/c1	Fin-specific	no-mutants
NEBL1	-	-	-	-	0.27	0.6	2.81	8.26	4.48	14.94	0,0,0/c1	Fin-specific	no-mutants
LOC102352186	-	-	-	-	0.37	0.53	0.84	1.24	1.41	3.86	0,0,0/c1	Fin-specific	no-mutants
AGXT2	0	0	0	0	1.64	0.93	1.02	2.08	3.16	7.63	0,0,0/c1	Fin-specific	probably-unrelated
RYR3	0.01	0.01	0	0.03	0.75	2.28	3.39	8.17	5.76	17.97	0,0,0/c1	Fin-specific	probably-unrelated
C2CD4B	0.07	0.05	0.1	0.14	0.3	0.2	0.54	0.69	0.8	2.21	0,0,0/c1	Fin-specific	no-mutants
GABRQ	0	0	0.04	0.04	0.04	0.25	0.33	0.38	0.22	1.02	0,0,0/c1	Fin-specific	probably-unrelated
LOC106704471	-	-	-	-	0.26	0.22	0.35	1.18	0.91	2.36	0,0,0/c1	Fin-specific	no-mutants
LOC102346553	-	-	-	-	5.05	2.52	4.66	5.81	3.95	20.9	0,0,0/c1	Fin-specific	no-mutants
LOC102364943	-	-	-	-	0.55	0.07	0.31	0.64	0.69	1.92	0,0,0/c1	Fin-specific	no-mutants
LOC102346651	-	-	-	-	0.15	0.27	0.9	1.99	1.46	4.42	0,0,0/c1	Fin-specific	no-mutants
HSPB7	0.46	0.03	0.08	0.22	0.07	0.98	4.47	6.94	3.19	15.2	0,0,0/c1	Fin-specific	embryonic lethality during organogenesis, complete penetrance
LOC102354390	-	-	-	-	0.73	1.45	1.9	2.28	2.21	7.95	0,0,0/c1	Fin-specific	no-mutants
LOC102359936	-	-	-	-	0.37	0.14	0.47	0.53	0.6	2.05	0,0,0/c1	Fin-specific	no-mutants
KLK5	0	0	0.07	0.28	0.73	0.63	0.4	0.89	0.67	3.53	0,0,0/c1	Fin-specific	no-mutants
MYOZ3	0.11	0.04	0.14	0.15	1.7	4.99	11.66	22.17	10.73	48.81	0,0,0/c1	Fin-specific	no-mutants
LOC102568924	-	-	-	-	0.79	1.04	0.85	1.13	1.42	5.15	0,0,0/c1	Fin-specific	no-mutants
LOC102690692	-	-	-	-	0.85	2.56	7.79	7.52	8.88	21.12	0,0,0/c1	Fin-specific	no-mutants
TRDN	0	0	0.02	0.46	0.19	0.35	1.11	1.68	1.72	4.05	0,0,0/c1	Fin-specific	probably-unrelated
METTL21E	0.08	0.02	0.04	0.05	0.05	0.24	0.35	0.65	0.65	1.41	0,0,0/c1	Fin-specific	no-mutants
DOCK2L	-	-	-	-	0.42	0.72	1	0.65	1.34	3.23	0,0,0/c1	Fin-specific	no-mutants
LOC103178760	-	-	-	-	0.47	0.54	0.7	1.49	1.3	3.63	0,0,0/c1	Fin-specific	no-mutants
RIPOR2	-	-	-	-	1.39	1.04	1.43	2.51	2.42	7.03	0,0,0/c1	Fin-specific	probably-unrelated
INKA2	-	-	-	-	1.08	1.75	3.57	4.41	5.23	12.41	0,0,0/c1	Fin-specific	probably-unrelated
LOC102365755	-	-	-	-	0.55	0.36	0.68	0.83	0.73	2.54	0,0,0/c1	Fin-specific	no-mutants
SCN11A	0	0.12	0.57	0.19	0.74	0.39	0.3	0.81	0.69	2.35	0,0,0/c1	Fin-specific	probably-unrelated
STAC2	0.49	0.4	0.52	0.98	0.79	0.52	0.6	0.45	0.45	2.6	0,0,0/c1	Fin-specific	no-mutants
INSRR	0.01	0.01	0.06	0.2	1.04	0.75	0.71	0.9	0.91	4.08	0,0,0/c1	Fin-specific	probably-unrelated
SLC6A11	0.01	0.04	0.03	0.01	2	2.6	2.37	1.97	1.33	6.17	0,0,0/c1	Fin-specific	probably-unrelated
TNNI3K	0	0.01	0	0	0.17	0.41	0.47	0.6	0.49	1.07	0,0,0/c1	Fin-specific	probably-unrelated
ALK	0.02	0.07	0.06	0.17	0.89	0.66	0.92	0.87	1.26	2.33	0,0,0/c1	Fin-specific	probably-unrelated
CORO6	0.13	0.13	0.06	0.79	1.16	2.03	2.45	3.14	2.48	5.76	0,0,0/c1	Fin-specific	probably-unrelated
LOC102354848	-	-	-	-	3.03	2.89	3.78	4.83	5.03	10.08	0,0,0/c1	Fin-specific	no-mutants
GABRE	0.1	0.06	0.17	0.17	0.67	0.39	0.59	1.02	0.93	1.84	0,0,0/c1	Fin-specific	no-mutants
SPTBN5	-	-	-	-	1.06	0.55	1.03	1.04	1.88	3.24	0,0,0/c1	Fin-specific	no-mutants
GRIN2A	0	0	0.05	0.15	1.2	0.86	1.46	1.22	1.95	3.62	0,0,0/c1	Fin-specific	probably-unrelated
LOC102358477	-	-	-	-	1.48	0.75	0.96	1.66	1.38	3.58	0,0,0/c1	Fin-specific	no-mutants
LOC102358995	-	-	-	-	4.16	3.52	5.67	5.09	5.6	14.92	0,0,0/c1	Fin-specific	no-mutants
LOC102688876	-	-	-	-	3.56	2.47	1.97	6.21	3.85	11.56	0,0,0/c1	Fin-specific	no-mutants
LOC106737316	-	-	-	-	0.4	0.41	0.26	0.38	0.5	1.29	0,0,0/c1	Fin-specific	no-mutants
LOC102345138	-	-	-	-	0.22	0.41	0.65	0.86	0.52	1.58	0,0,0/c1	Fin-specific	no-mutants
LOC102350487	-	-	-	-	14.36	12.68	20.47	28.62	25.38	55.94	0,0,0/c1	Fin-specific	no-mutants
LOC102353502	-	-	-	-	0.34	0.45	0.3	0.37	0.61	1.24	0,0,0/c1	Fin-specific	no-mutants
LOC102346168	-	-	-	-	2.96	5.85	8.93	9.19	9.23	19.33	0,0,0/c1	Fin-specific	no-mutants
LOC102366117	-	-	-	-	1.23	0.67	2.83	1.63	1.23	4.89	0,0,0/c1	Fin-specific	no-mutants
ZNF385D	-	-	-	-	0.88	1.84	3.34	3.32	3.32	6.32	0,0,0/c1	Fin-specific	no-mutants
NPAS1	0	0	0	0	0.32	0.37	0.44	0.6	0.7	1.21	0,0,0/c1	Fin-specific	probably-unrelated
LOC106704760	-	-	-	-	0.53	0.37	0	0	0.91	1.11	0,0,0/c1	Fin-specific	no-mutants
TLX1	0.14	0.14	0.17	0.35	0.27	0.5	0.87	0.48	0.71	1.49	0,0,0/c1	Fin-specific	probably-unrelated
PLLP	0.05	0.3	0.07	0.26	0.18	0.42	0.9	1.04	0.46	1.48	0,0,0/c1	Fin-specific	no-mutants
LOC102355322	-	-	-	-	1.47	1.86	1.89	3.18	2.8	4.92	0,0,0/c1	Fin-specific	no-mutants
FAM19A4	0.18	0.38	0.51	0.67	1.29	1.6	2.09	2.66	3.82	5.71	0,0,0/c1	Fin-specific	no-mutants
ITGBL1	0.03	0.05	0.02	0.06	6.19	7.97	9.41	9.8	16.54	23.83	0,0,0/c1	Fin-specific	no-mutants
LOC102355794	-	-	-	-	0.36	0.58	0.79	0.83	1.24	1.78	0,0,0/c1	Fin-specific	no-mutants
SLC25A34	0	0	0	0.04	0.52	0.47	0.7	0.77	0.97	1.62	0,0,0/c1	Fin-specific	no-mutants
LOC102363797	-	-	-	-	0.38	0.44	0.47	0.63	0.84	1.29	0,0,0/c1	Fin-specific	no-mutants
FAM124A	0.19	0.1	0.22	0.92	0.15	1.04	3.21	2.8	0.85	4.19	0,0,0/c1	Fin-specific	no-mutants
LOC102571905	-	-	-	-	0.4	0.4	0.32	0.19	0.52	1.01	0,0,0/c1	Fin-specific	no-mutants
LOC106702092	-	-	-	-	1.95	2.16	2.84	4.23	1.88	6.76	0,0,0/c1	Fin-specific	no-mutants
LOC102353315	-	-	-	-	0.19	0.56	0.56	0.56	0.5	1.14	0,0,0/c1	Fin-specific	no-mutants
ABCC8	0.13	0.1	0.1	0.14	3.98	4	4.57	6.9	7.4	12.05	0,0,0/c1	Fin-specific	probably-unrelated
TSPAN1	0.03	0.02	0	0	0.46	1.03	0.27	0.61	0.95	1.67	0,0,0/c1	Fin-specific	no-mutants
MYL10	0.06	0	0	0	0.06	1.31	1.82	1.84	0.94	2.64	0,0,0/c1	Fin-specific	no-mutants
LOC102360263	-	-	-	-	2.89	4.77	4.17	5.32	6.72	10.79	0,0,0/c1	Fin-specific	no-mutants
THSD7B	0.02	0.08	0.21	0.86	1.41	2.56	2.21	1.1	2.13	4.67	0,0,0/c1	Fin-specific	no-mutants
TLL2	0	0	0.06	0.78	4.85	2.82	2.29	2.09	5.73	9.27	0,0,0/c1	Fin-specific	probably-unrelated
TMOD4	0.13	0.09	0.1	0.28	5.15	6.14	7.98	8.18	5.5	15.98	0,0,0/c1	Fin-specific	no-mutants
LOC102363708	-	-	-	-	6.36	9.66	10.75	9.3	6.68	22.06	0,0,0/c1	Fin-specific	no-mutants
LOC103190149	-	-	-	-	1.04	1.83	2.39	2.48	1.93	4.77	0,0,0/c1	Fin-specific	no-mutants
TSNARE1	-	-	-	-	0.51	1.09	1.3	1.7	1.02	2.86	0,0,0/c1	Fin-specific	no-mutants
HES5	0.08	0.06	0.2	0.54	4.39	5.06	3.7	5.52	6.99	13.12	0,0,0/c1	Fin-specific	probably-unrelated
LOC102363240	-	-	-	-	0.51	0.24	0.2	0.26	0.65	1.14	0,0,0/c1	Fin-specific	no-mutants
LOC102363010	-	-	-	-	4.74	5.31	5.14	6.46	8.18	14.41	0,0,0/c1	Fin-specific	no-mutants
ATP2B3	0.06	0.07	0.19	0.18	1.7	1.35	1.37	1.92	2.94	4.74	0,0,0/c1	Fin-specific	no-mutants
MYOC	0	0	0	0	3.15	6.58	6.98	4.75	4.95	14.43	0,0,0/c1	Fin-specific	probably-unrelated
NKX2	0.26	0.02	0.16	0.17	0.17	0.58	0.5	0.37	0.34	1.08	0,0,0/c1	Fin-specific	no-mutants
CACNG3	0	0.03	0	0.06	2.24	2.32	2.45	3.36	3.39	6.79	0,0,0/c1	Fin-specific	probably-unrelated
LOC102353586	-	-	-	-	6.87	3.35	3.28	3.34	3	14.36	0,0,0/c1	Fin-specific	no-mutants
LOC102572547	-	-	-	-	0.37	0.42	0.37	0.72	0.57	1.49	0,0,0/c1	Fin-specific	no-mutants
LOC102348625	-	-	-	-	0.46	0.24	0.37	0.42	0.21	1.13	0,0,0/c1	Fin-specific	no-mutants
AGBL1	0.01	0	0	0.01	0.4	0.12	0.25	0.38	0.31	1.13	0,0,0/c1	Fin-specific	no-mutants
SLC45A2	0	0.01	0	0.06	0.56	0.41	0.46	0.53	0.51	1.78	0,0,0/c1	Fin-specific	probably-unrelated
ITGAM	0.01	0.21	0.46	0.75	1.47	0.8	0.28	1.43	1.09	3.78	0,0,0/c1	Fin-specific	probably-unrelated
TTC7A	-	-	-	-	0.64	0.73	0.26	1.29	0.67	2.5	0,0,0/c1	Fin-specific	no-mutants
LOC102359920	-	-	-	-	0.38	0.36	0.3	0.61	0.45	1.52	0,0,0/c1	Fin-specific	no-mutants
FOXF1	0.45	0.37	0.2	0.29	0.24	1	0.69	0.93	0.66	2.3	0,0,0/c1	Fin-specific	embryonic lethality during organogenesis, complete penetrance
SLC8A3	0.11	0.46	0.91	0.73	1.81	1.69	2.36	2.73	3.6	8.05	0,0,0/c1	Fin-specific	probably-unrelated
REM1	0.08	0.07	0.44	0.67	0.28	0.66	0.86	1	1.31	2.63	0,0,0/c1	Fin-specific	no-mutants
LOC106737475	-	-	-	-	0.17	0.34	0.58	0.22	0.73	1.29	0,0,0/c1	Fin-specific	no-mutants
RASGRP4	0.32	0.43	0.48	0.52	0.35	0.29	0.63	0.7	0.99	1.9	0,0,0/c1	Fin-specific	probably-unrelated
DPP4	0.13	0.17	0.31	0.35	1.2	2.18	0.82	2.39	3.06	6.32	0,0,0/c1	Fin-specific	probably-unrelated
ATP1B4	0	0	0	0.39	0.01	0.24	0.83	1.15	0.74	1.97	0,0,0/c1	Fin-specific	no-mutants
LOC102365312	-	-	-	-	0.05	0.59	0.69	0.82	0.8	1.83	0,0,0/c1	Fin-specific	no-mutants
POU3F2	0.03	0.04	0.08	0.1	0.92	2.27	3.38	4.68	4.68	9.01	0,0,0/c1	Fin-specific	probably-unrelated
LOC107075948	-	-	-	-	1.46	3.28	4.04	5.55	5.36	10.78	0,0,0/c1	Fin-specific	no-mutants
LOC103174810	-	-	-	-	0.31	1.52	0.67	2.58	1.6	3.93	0,0,0/c1	Fin-specific	no-mutants
IL1RAPL1	0	0.03	0.03	0.33	0.87	0.85	1.76	2.44	2.11	4.83	0,0,0/c1	Fin-specific	probably-unrelated
ABLIM2	0.19	0.06	0.2	0.17	0.87	0.9	1.37	1.33	1.75	3.67	0,0,0/c1	Fin-specific	no-mutants
CEACAM5	0	0	0	0	2.37	3.12	4.58	6.81	6.39	12.91	0,0,0/c1	Fin-specific	no-mutants
AGMAT	0.03	0.09	0.03	0.03	5.65	9.42	17.01	18.13	10.29	38.27	0,0,0/c1	Fin-specific	no-mutants
LOC423731	-	-	-	-	0.43	0.48	1.4	2.11	1	3.37	0,0,0/c1	Fin-specific	no-mutants
LOC102357997	-	-	-	-	1.62	2.94	6.61	7.74	6.44	17.79	0,0,0/c1	Fin-specific	no-mutants
IQCJ	0	0	0	0	0.43	0.36	1.63	1.58	1.72	3.66	0,0,0/c1	Fin-specific	no-mutants
LOC102347483	-	-	-	-	18.37	18.51	49.59	68.11	42.63	142.92	0,0,0/c1	Fin-specific	no-mutants
SCN9A	0	0	0.03	0.19	0.17	0.28	0.44	0.65	0.53	1.51	0,0,0/c1	Fin-specific	probably-unrelated
LOC102352793	-	-	-	-	1.43	1.07	2.29	2.55	2.48	7.17	0,0,0/c1	Fin-specific	no-mutants
LOC102366575	-	-	-	-	2.37	2.95	4.99	5.17	5.46	14.82	0,0,0/c1	Fin-specific	no-mutants
LOC102360782	-	-	-	-	0.17	0.27	0.18	0.25	0.45	1.01	0,0,0/c1	Fin-specific	no-mutants
ASB5	0.2	0.18	0.08	0.25	0.23	0.25	0.54	0.59	0.82	1.59	0,0,0/c1	Fin-specific	no-mutants
JAKMIP1	0.11	0.05	0.14	0.51	0.51	0.74	1.09	1.31	2.2	4.21	0,0,0/c1	Fin-specific	probably-unrelated
CPA1	0.28	0.16	0.26	0.44	0.55	0.84	0.93	1.06	1.9	3.35	0,0,0/c1	Fin-specific	probably-unrelated
GRIK1	0.1	0.21	0.44	0.7	0.04	0.96	1.59	1.97	2.2	4.3	0,0,0/c1	Fin-specific	probably-unrelated
LTBP2	0.03	0.04	0.03	0.2	13.27	11.77	22.71	32.92	38.56	73.12	0,0,0/c1	Fin-specific	embryonic lethality between implantation and somite formation, complete penetrance
KCNK4	0.02	0.02	0.07	0.11	0.83	1.16	1.4	2.56	2.9	4.65	0,0,0/c1	Fin-specific	no-mutants
RELN	0.64	0.34	0.68	0.92	1.21	1.21	2.06	4.71	4.37	7.47	0,0,0/c1	Fin-specific	probably-unrelated
LOC102367661	-	-	-	-	1.08	2.05	2.94	4.36	4.99	8.51	0,0,0/c1	Fin-specific	no-mutants
LOC102359544	-	-	-	-	0.43	0.94	1.52	2.85	1.95	4.4	0,0,0/c1	Fin-specific	no-mutants
ADRB2	0.14	0.19	0.4	0.69	0.29	0.42	0.86	1.33	1.04	2.18	0,0,0/c1	Fin-specific	probably-unrelated
LOC102347576	-	-	-	-	0.12	1.14	2.34	9.11	4.89	12.55	0,0,0/c1	Fin-specific	no-mutants
LOC102365959	-	-	-	-	0.15	0.44	0.79	2.31	1.08	2.97	0,0,0/c1	Fin-specific	no-mutants
LOC102363311	-	-	-	-	3.4	3.6	5.85	8.62	9.65	15.94	0,0,0/c1	Fin-specific	no-mutants
PPP1R3A	0	0.02	0.04	0.11	0.65	1.49	3.9	4.45	2.94	6.99	0,0,0/c1	Fin-specific	probably-unrelated
NKAIN3	0.21	0.27	0.44	0.54	0.83	1.11	1.83	1.48	2.11	3.75	0,0,0/c1	Fin-specific	no-mutants
OPRK1	0.14	0.13	0.15	0.21	0.34	0.12	1.44	0.26	0.93	2.01	0,0,0/c1	Fin-specific	probably-unrelated
LOC103187000	-	-	-	-	0.63	0.73	0.87	1.45	1.68	2.79	0,0,0/c1	Fin-specific	no-mutants
LOC102346309	-	-	-	-	0.08	1.1	4.55	13.74	7.52	17.33	0,0,0/c1	Fin-specific	no-mutants
BHLHE41	0.15	0.13	0.19	0.55	0.54	0.39	0.7	1.09	1.35	1.88	0,0,0/c1	Fin-specific	probably-unrelated
DNASE1L3	0.22	0.01	0.03	0.06	0.01	1.12	0.5	0.84	1.27	2.19	0,0,0/c1	Fin-specific	probably-unrelated
OBSCN	0	0.03	0.07	0.6	3.51	6.77	10.73	26.01	17.58	34.85	0,0,0/c1	Fin-specific	probably-unrelated
PAXX	-	-	-	-	1.22	2.25	1.98	3.95	3.83	6.74	0,0,0/c1	Fin-specific	probably-unrelated
NRAP	0.04	0.01	0.06	0.49	0.2	0.42	0.89	3.09	1.38	3.83	0,0,0/c1	Fin-specific	no-mutants
ADAMTSL3	0.02	0.04	0.27	0.51	1.2	1.12	2.02	2.93	3.54	5.56	0,0,0/c1	Fin-specific	no-mutants
GRM4	0.23	0.3	0.31	0.52	0.92	0.81	1.23	2.04	2.57	3.64	0,0,0/c1	Fin-specific	probably-unrelated
LOC102364426	-	-	-	-	0.19	0.23	0.65	0.31	0.73	1.03	0,0,0/c1	Fin-specific	no-mutants
TUBA3B	0	0	0.03	0.03	8.16	14.3	25.36	29.92	31.95	50.14	0,0,0/c1	Fin-specific	no-mutants
LOC102357285	-	-	-	-	0.3	1.74	2.35	3.92	2.95	5.3	0,0,0/c1	Fin-specific	no-mutants
CHRM1	0.01	0.01	0.16	0.18	0.82	1.56	2.62	2.64	3.42	5.17	0,0,0/c1	Fin-specific	probably-unrelated
PEBP4	0	0	0	0	0.13	0.15	0.41	0.82	0.61	1.03	0,0,0/c1	Fin-specific	no-mutants
VSTM2A	0.01	0.35	0.46	0.54	0.3	1.28	4.42	8.89	8.77	12.01	0,0,0/c1	Fin-specific	no-mutants
LOC102351098	-	-	-	-	0.01	1.79	1.13	2.26	3.22	4.29	0,0,0/c1	Fin-specific	no-mutants
PPARG	0.13	0.11	0.31	0.36	0.1	0.43	0.73	1.12	1.25	1.72	0,0,0/c1	Fin-specific	embryonic lethality prior to tooth bud stage,embryonic lethality during organogenesis, complete penetrance,embryonic lethality, complete penetrance
ANKH	-	-	-	-	0.33	0.34	0.52	1.07	1.16	1.72	0,0,0/c1	Fin-specific	no-mutants
WFDC3	0.16	0.3	0.22	0.19	22.2	50.68	106.22	138.29	174.09	267.08	0,0,0/c1	Fin-specific	no-mutants
LOC102346078	-	-	-	-	0.32	0.62	1.1	1.89	2.19	3.09	0,0,0/c1	Fin-specific	no-mutants
RAB7B	0.01	0.08	0.15	0.35	1.63	3.35	4.94	7.79	9.16	11.08	0,0,0/c1	Fin-specific	no-mutants
WFDC1	0	0	0	0.08	14.29	21.49	45.87	57.04	74.69	85.02	0,0,0/c1	Fin-specific	probably-unrelated
ANGPTL7	0.01	0	0.12	0.39	1.78	7.89	16.49	22.6	29.9	34.65	0,0,0/c1	Fin-specific	no-mutants
CFI	0.06	0.05	0.12	0.02	0.02	0.16	0.37	1.46	2.43	0.29	0,0,0/c1	Fin-specific	probably-unrelated
GCNT3	0.01	0	0.02	0.02	0.88	1.47	2.37	3.29	4.96	4.75	0,0,0/c1	Fin-specific	probably-unrelated
LOC102357400	-	-	-	-	0.35	0.53	0.89	0.83	1.83	1.83	0,0,0/c1	Fin-specific	no-mutants
LOC102354780	-	-	-	-	0.37	2.44	5.06	8.02	10.22	10.4	0,0,0/c1	Fin-specific	no-mutants
FUT9	0.07	0.07	0.11	0.09	0.35	1.05	1.82	2.44	3.64	3.98	0,0,0/c1	Fin-specific	probably-unrelated
LOC102565177	-	-	-	-	19.09	30.73	61.4	56.97	115.06	109.84	0,0,0/c1	Fin-specific	no-mutants
LVRN	0.03	0.14	0.34	0.77	0.61	1.33	1.13	2.01	4.36	4.05	0,0,0/c1	Fin-specific	no-mutants
ADRA2C	0.1	0.06	0.03	0.06	0.58	0.44	1.26	1.83	2.77	2.86	0,0,0/c1	Fin-specific	probably-unrelated
DMRT3	0.04	0.07	0.42	0.24	0.01	0.17	1.54	2.53	3.83	3.6	0,0,0/c1	Fin-specific	probably-unrelated
PCSK1	0.24	0.12	0.14	0.04	0.17	1.24	1.74	1.72	4.12	4.26	0,0,0/c1	Fin-specific	oligodactyly,embryonic lethality before implantation, complete penetrance
LOC102364058	-	-	-	-	2.49	4.83	12.53	13.56	24.02	27.69	0,0,0/c1	Fin-specific	no-mutants
ASIP	-	-	-	-	1.88	3.67	15.54	18.38	30.24	32.93	0,0,0/c1	Fin-specific	no-mutants
LOC103174825	-	-	-	-	0.44	0.52	1.44	0.59	2.96	3.36	0,0,0/c1	Fin-specific	no-mutants
LOC103185843	-	-	-	-	1.07	8.09	5.75	13.47	26.72	25.18	0,0,0/c1	Fin-specific	no-mutants
KCTD16	0	0.03	0.09	0.29	0.14	0.23	0.94	1.37	2.64	2.94	0,0,0/c1	Fin-specific	probably-unrelated
CSF3R	0.18	0.15	0.4	0.19	0.13	0.14	0.53	0.61	1.09	1.24	0,0,0/c1	Fin-specific	probably-unrelated
CYP3A13	0	0	0.02	0.03	1.06	3.41	8.87	6.74	15.25	18.06	0,0,0/c1	Fin-specific	probably-unrelated
OPRL1	0.25	0.32	0.94	0.9	0.07	0.27	0.21	1.27	1.65	1.74	0,0,0/c1	Fin-specific	probably-unrelated
LOC106701774	-	-	-	-	0.17	0.62	1.42	1.71	2.69	3.36	0,0,0/c1	Fin-specific	no-mutants
LOC102574217	-	-	-	-	0.05	2.97	2.72	8.97	30.72	10.27	0,0,0/c1	Fin-specific	no-mutants
LOC102574761	-	-	-	-	0.2	0.6	1.19	1.08	2.04	1.73	0,0,0/c1	Fin-specific	no-mutants
PLG	0.03	0	0.1	0.05	0	0.58	0.67	0.46	1.42	1.01	0,0,0/c1	Fin-specific	probably-unrelated
LOC102347924	-	-	-	-	0.39	0.36	1.01	0.52	2.15	1.43	0,0,0/c1	Fin-specific	no-mutants
LOC102363743	-	-	-	-	0.13	0.27	0.67	0.83	1.25	0.98	0,0,0/c1	Fin-specific	no-mutants
LOC102569438	-	-	-	-	0.23	0.55	0.94	1.14	2.12	1.29	0,0,0/c1	Fin-specific	no-mutants
MUC19	0	0	0	0	6.73	47.23	126.21	161.12	229.56	161.58	0,0,0/c1	Fin-specific	probably-unrelated
CLEC18A	0	0	0	0	0.3	0.35	0.72	0.99	1.53	0.98	0,0,0/c1	Fin-specific	no-mutants
B4GALNT2	0.21	0.01	0.05	0.04	0.44	1.93	4.49	4.67	9.42	6.69	0,0,0/c1	Fin-specific	probably-unrelated
TMEM272	-	-	-	-	0.13	0.06	0.18	0.93	2.56	1.3	0,0,0/c1	Fin-specific	no-mutants
LOC103184342	-	-	-	-	0.31	1.11	1.81	2.55	5.51	3.8	0,0,0/c1	Fin-specific	no-mutants
HABP2	0.24	0.09	0.08	0.05	0.16	0.49	1.05	1.21	2.24	2.06	0,0,0/c1	Fin-specific	probably-unrelated
LOC102355350	-	-	-	-	0.28	0.44	0.19	0.46	1.5	1.21	0,0,0/c1	Fin-specific	no-mutants
LOC103172690	-	-	-	-	0.13	1.4	0.14	0.29	4.25	2.31	0,0,0/c1	Fin-specific	no-mutants
LOC102348686	-	-	-	-	0	0.2	0.35	0.61	3.11	2.12	0,0,0/c1	Fin-specific	no-mutants
LOC102355271	-	-	-	-	0.31	0.55	0.46	0.51	1.78	1.67	0,0,0/c1	Fin-specific	no-mutants
SLC44A4	0.01	0.01	0.03	0	0.32	0.66	1.4	1.65	2.71	2.45	0,0,0/c1	Fin-specific	no-mutants
CILP2	0.11	0.15	0.22	0.61	0.18	0.67	0.9	1.28	2.14	1.83	0,0,0/c1	Fin-specific	no-mutants
LOC103175320	-	-	-	-	0	0.4	0.64	1.05	2.4	0.36	0,0,0/c1	Fin-specific	no-mutants
FOSB	0.07	0.04	0.02	0.24	0.28	0.47	0.59	0.75	2.18	0.78	0,0,0/c1	Fin-specific	probably-unrelated
LOC102357152	-	-	-	-	0.47	0.49	0.91	0.7	2.57	1.81	0,0,0/c1	Fin-specific	no-mutants
MUC4	0	0	0	0	0.17	2.34	14.7	24.69	44.02	17.91	0,0,0/c1	Fin-specific	probably-unrelated
EGR2	0.08	0.05	0.03	0.27	1.04	1.27	3.73	3.05	12.21	2.87	0,0,0/c1	Fin-specific	abnormal long bone morphology,hindlimb paralysis
SNTG1	0	0	0	0.01	0	0.25	0.91	0.88	1.31	1.36	0,0,0/c1	Fin-specific	no-mutants
CHAC1	0.68	0.57	0.64	0.44	0.22	0.65	0.14	0.49	1.37	1	0,0,0/c1	Fin-specific	no-mutants
LOC106737496	-	-	-	-	0.16	0.25	0.27	0.4	1.24	0.85	0,0,0/c1	Fin-specific	no-mutants
TIMP4	0	0	0.42	0.2	0.06	0.49	26.33	48.93	53.48	51.61	0,0,0/c1	Fin-specific	probably-unrelated
ADORA3	0	0.05	0.07	0.16	0	0	0.33	0.53	1.13	0.54	0,0,0/c1	Fin-specific	probably-unrelated
LOC106703573	-	-	-	-	0.17	2.12	0.99	1.75	4.77	2.36	0,0,0/c1	Fin-specific	no-mutants
TG	0.07	0.13	0.13	0.1	0.15	0.52	0.68	0.55	1.44	1.26	0,0,0/c1	Fin-specific	probably-unrelated
OTOGL	0	0	0.05	0.15	0.35	0.93	1.58	3.58	6.24	4.56	0,0,0/c1	Fin-specific	no-mutants
GPRC6A	0	0	0	0	0.33	2.28	5.07	6.56	13.47	8.01	0,0,0/c1	Fin-specific	probably-unrelated
LOC102576054	-	-	-	-	0.27	0.36	0.51	0.59	1.04	0.82	0,0,0/c1	Fin-specific	no-mutants
TEKT3	0.02	0.04	0.05	0.33	0.79	0.97	4.02	3.77	5.43	4.65	0,0,0/c1	Fin-specific	probably-unrelated
NUGGC	0	0.02	0.09	0.04	0.56	1.18	1.4	1.2	2.58	1.45	0,0,0/c1	Fin-specific	probably-unrelated
GJB4	0.27	0.02	0.03	0.1	0.73	2.59	3.78	4.91	6.48	5.52	0,0,0/c1	Fin-specific	probably-unrelated
LOC102361227	-	-	-	-	6.91	46.91	113.01	118.98	160.76	118.9	0,0,0/c1	Fin-specific	no-mutants
LOC102345680	-	-	-	-	0.16	0.51	0.75	0.75	1.26	0.31	0,0,0/c1	Fin-specific	no-mutants
LOC102363236	-	-	-	-	1.18	1.28	1.42	2.84	3.93	2.13	0,0,0/c1	Fin-specific	no-mutants
KNG2	0.64	0	0.03	0.06	0.05	0.93	1.06	0.97	1.88	0.45	0,0,0/c1	Fin-specific	probably-unrelated
LOC102347051	-	-	-	-	0.17	2.79	4.27	3.14	8.19	2.61	0,0,0/c1	Fin-specific	no-mutants
SLC5A12	0.02	0.03	0.01	0.03	0.65	3.67	6.99	7.27	10.31	8.84	0,0,0/c1	Fin-specific	no-mutants
CSMD3	0	0	0.01	0.12	1.59	1.61	2.49	2.32	4.97	2.28	0,0,0/c1	Fin-specific	no-mutants
PTGER1	0	0.08	0.02	0.4	1.03	1.83	3.5	3.54	5.26	4.32	0,0,0/c1	Fin-specific	probably-unrelated
GJD3	0.17	0	0	0	0.22	0.83	1.65	1.52	2.55	2.1	0,0,0/c1	Fin-specific	probably-unrelated
LOC101748153	-	-	-	-	1.61	3.76	13.4	17.51	20.99	17	0,0,0/c1	Fin-specific	no-mutants
LOC102353516	-	-	-	-	0.33	1.44	1.65	1.91	3.62	2.04	0,0,0/c1	Fin-specific	no-mutants
LOC102557863	-	-	-	-	0.85	1.67	2.4	2.31	4.81	3.05	0,0,0/c1	Fin-specific	no-mutants
MSLNL	0	0	0	0	7.28	16.7	17.94	37.15	49.3	17.15	0,0,0/c1	Fin-specific	no-mutants
LOC102356182	-	-	-	-	0.34	0.43	0.41	0.61	1.34	0.69	0,0,0/c1	Fin-specific	no-mutants
IL13RA2	0.03	0.02	0.02	0.04	0.43	1.49	5.78	7.17	7.78	7.57	0,0,0/c1	Fin-specific	probably-unrelated
AHNAK2	-	-	-	-	9.92	13.5	15.02	14.41	39.52	14.33	0,0,0/c1	Fin-specific	no-mutants
ANGPTRL2	-	-	-	-	17.19	79.33	68.62	55.64	158.7	74.98	0,0,0/c1	Fin-specific	no-mutants
CCN2	-	-	-	-	5.5	13.54	32	56.69	58.04	61.38	0,0,0/c1	Fin-specific	no-mutants
LOC107076670	-	-	-	-	0.01	0.12	0.08	2.31	2.68	1.48	0,0,0/c1	Fin-specific	no-mutants
PTH2R	0	0.02	0.05	0.02	0.6	0.14	1.46	3.42	3.82	1.57	0,0,0/c1	Fin-specific	no-mutants
GIF	0	0	0	0	4.43	9.35	6.72	13.85	21.52	21.15	0,0,0/c1	Fin-specific	probably-unrelated
BLNK	0.11	0.13	0.68	0.55	0.5	1.32	2.46	4.14	4.62	5.08	0,0,0/c1	Fin-specific	probably-unrelated
PPP1R27	0	0	0.06	0.13	0	0.09	0.29	1.03	1.45	0.49	0,0,0/c1	Fin-specific	no-mutants
MSLN	0.1	0.08	0	0	0.61	3.13	3.29	6.64	10.63	2.87	0,0,0/c1	Fin-specific	probably-unrelated
OVCH2	0	0	0	0	1.42	1.21	1.44	2.43	4.49	3.66	0,0,0/c1	Fin-specific	no-mutants
LOC103174804	-	-	-	-	0	0	0.38	1.38	1.78	1.05	0,0,0/c1	Fin-specific	no-mutants
LOC102559431	-	-	-	-	0.3	5.31	6.59	6.78	14.43	5.99	0,0,0/c1	Fin-specific	no-mutants
CDH26	0.09	0.28	0.04	0.16	0.03	3.43	1.65	2.28	6.33	4.91	0,0,0/c1	Fin-specific	no-mutants
MAEL	0.04	0.05	0.03	0.12	0.47	0.32	0.55	0.72	1.58	1.06	0,0,0/c1	Fin-specific	probably-unrelated
FABP6	0	0	0	0	0.88	3.25	3.44	4.38	7.37	6.36	0,0,0/c1	Fin-specific	probably-unrelated
TMPRSS5	0	0	0.02	0	0.4	1.55	2.16	1.65	3.82	2.93	0,0,0/c1	Fin-specific	no-mutants
LOC102571438	-	-	-	-	0.13	0.3	0.32	0.79	1.14	0.49	0,0,0/c1	Fin-specific	no-mutants
GPAT3	0.48	0.25	0.49	0.71	0.34	0.25	0.44	0.66	1.28	0.95	0,0,0/c1	Fin-specific	probably-unrelated
LOC106706836	-	-	-	-	1.3	3.65	3.57	9.08	13.58	4.88	0,0,0/c1	Fin-specific	no-mutants
LOC103187771	-	-	-	-	0.18	0.38	0.3	0.59	1.38	0.48	0,0,0/c1	Fin-specific	no-mutants
PRRXL1	0	0	0	0.13	0.1	0.77	1.74	2.47	3.39	2.97	0,0,0/c1	Fin-specific	probably-unrelated
MMP20	0	0	0	0	0.14	1.16	0.53	1.68	2.38	1.65	0,0,0/c1	Fin-specific	probably-unrelated
FSTL5	0	0.01	0.11	0.3	0.22	0.69	0.97	1.17	2	0.32	0,0,0/c1	Fin-specific	no-mutants
FAM183B	0.12	0.4	0	0	0.95	0.26	0.95	0.72	2.67	0.75	0,0,0/c1	Fin-specific	no-mutants
SLC2A2	0.16	0.02	0.02	0	0.49	1.3	0.7	1.73	2.9	1.26	0,0,0/c1	Fin-specific	probably-unrelated
GJB7	-	-	-	-	0.6	1.62	2.08	2.76	3.36	3.86	0,0,0/c1	Fin-specific	no-mutants
LOC106703574	-	-	-	-	0.13	2.17	0.92	2.17	3.46	1.89	0,0,0/c1	Fin-specific	no-mutants
MYH6	0.15	0.03	0.12	0.23	0	3.22	8.38	12.87	14.24	0	0,0,0/c1	Fin-specific	embryonic lethality during organogenesis, complete penetrance
ADAM28	0.19	0.14	0.23	0.25	6	12.32	20.71	30.95	33.55	34.84	0,0,0/c1	Fin-specific	no-mutants
FGG	0.28	0.13	0.63	0.03	0.13	0.68	1.37	0.61	2.32	0.6	0,0,0/c1	Fin-specific	probably-unrelated
RADIL	0.46	0.36	0.61	0.93	1.17	1.24	2.13	2.63	4.59	1.53	0,0,0/c1	Fin-specific	no-mutants
PIPOX	0.33	0.14	0.28	0.32	0.3	0.54	0.78	0.76	1.57	0.9	0,0,0/c1	Fin-specific	abnormal digit morphology
SLC10A4	0.18	0.21	0.69	0.24	1.43	1.32	3.41	3.43	5.33	4.13	0,0,0/c1	Fin-specific	probably-unrelated
TC2N	0.19	0.09	0.17	0.25	1.57	6.34	9.93	12.58	18.77	12.08	0,0,0/c1	Fin-specific	no-mutants
ANKDD1B	0.01	0	0.04	0.07	1.44	1.87	2.34	3.1	4.71	3.23	0,0,0/c1	Fin-specific	no-mutants
UGT2B34	0	0	0.01	0	1.67	3.9	6.27	5.45	9.16	6.21	0,0,0/c1	Fin-specific	no-mutants
LOC109283187	-	-	-	-	3.88	5.92	8.14	11.9	14.84	13.44	0,0,0/c1	Fin-specific	no-mutants
LOC103181774	-	-	-	-	1.15	3.05	4.49	4.7	7.21	5.67	0,0,0/c1	Fin-specific	no-mutants
LOC102684290	-	-	-	-	19.2	37.33	41	67.04	76.78	72.8	0,0,0/c1	Fin-specific	no-mutants
GPR45	0.1	0.08	0.14	0.15	0.34	0.5	0.55	0.69	1.03	0.53	0,0,0/c1	Fin-specific	no-mutants
MAG	0.17	0.03	0.09	0.12	0.48	0.77	1.23	1.49	1.8	1.95	0,0,0/c1	Fin-specific	probably-unrelated
LOC106706210	-	-	-	-	0.22	0.77	0.89	1.33	1.45	1.22	0,0,0/c1	Fin-specific	no-mutants
LOC102558510	-	-	-	-	0.56	1.6	2.54	2.37	3.36	2.59	0,0,0/c1	Fin-specific	no-mutants
KIAA1671	-	-	-	-	0.8	0.99	1.7	1.8	2.74	2.3	0,0,0/c1	Fin-specific	no-mutants
PSME2B	0.2	0.07	0	0.07	32.52	60.05	69.8	84.13	126.7	89.23	0,0,0/c1	Fin-specific	no-mutants
LOC102362386	-	-	-	-	0.69	0.72	1.25	2.52	2.54	1.94	0,0,0/c1	Fin-specific	no-mutants
PCDH15	0.01	0	0.08	0.25	1.07	1.09	2.49	3.81	4.06	2.63	0,0,0/c1	Fin-specific	probably-unrelated
LOC102345720	-	-	-	-	1.86	2.4	3.08	3.2	5.8	3.26	0,0,0/c1	Fin-specific	no-mutants
SLC16A11	0	0	0	0.06	0.42	0.68	0.89	1.11	1.55	1.6	0,0,0/c1	Fin-specific	no-mutants
KCNQ1	0.35	0.45	0.49	0.64	0.58	0.52	0.73	0.51	1.4	0.95	0,0,0/c1	Fin-specific	probably-unrelated
RDH5	0.29	0.41	0.24	0.2	1.82	1.64	2.67	3.78	5.19	4	0,0,0/c1	Fin-specific	probably-unrelated
PTGS2	0.01	0.06	0	0.09	2.33	3.37	3.58	3.95	7.37	4.39	0,0,0/c1	Fin-specific	probably-unrelated
HES2	0	0.02	0	0	0.23	0.77	0.87	1.3	1.53	1.51	0,0,0/c1	Fin-specific	no-mutants
LOC102351073	-	-	-	-	0.88	1.51	4.7	3.41	5.18	4.16	0,0,0/c1	Fin-specific	no-mutants
LOC103183844	-	-	-	-	1.2	3.29	5.08	7.17	8.98	5.35	0,0,0/c1	Fin-specific	no-mutants
CEP170P1	-	-	-	-	0.71	1.22	0.65	0.95	2.15	1.13	0,0,0/c1	Fin-specific	no-mutants
ST8SIA6	0.28	0.38	0.79	0.88	0.27	0.75	1.04	0.83	1.64	1.05	0,0,0/c1	Fin-specific	no-mutants
FOXQ1	0.02	0.03	0.12	0.54	4.84	11.2	23.61	19.79	28.78	25.8	0,0,0/c1	Fin-specific	embryonic lethality during organogenesis, incomplete penetrance
NR3C2	0.01	0.02	0.15	0.65	2.26	3.21	4.41	5.05	6.17	6.96	0,0,0/c1	Fin-specific	probably-unrelated
LOC103187508	-	-	-	-	2.47	3.63	4.14	3.86	6.65	3.86	0,0,0/c1	Fin-specific	no-mutants
RNF223	0.26	0.49	0.63	0.59	1.61	4.57	6.18	7.03	9.19	4.49	0,0,0/c1	Fin-specific	no-mutants
ENTPD2	0.05	0	0	0.07	0.87	0.8	1.11	1.13	2.07	1.93	0,0,0/c1	Fin-specific	probably-unrelated
LOC103188768	-	-	-	-	0	0.25	1.21	0.43	1.22	0.47	0,0,0/c1	Fin-specific	no-mutants
ABCA13	0	0.01	0.01	0.04	3.71	4.95	5.3	6.51	9.43	4.13	0,0,0/c1	Fin-specific	probably-unrelated
ADAMTSL5	0.07	0.16	0.18	0.26	1.02	1.57	3.77	3.65	3.77	4.81	0,0,0/c1	Fin-specific	probably-unrelated
STXBP5L	0.02	0.02	0.02	0.02	1	1.02	1.41	1.79	2.55	2.59	0,0,0/c1	Fin-specific	probably-unrelated
LOC102357250	-	-	-	-	0.22	0.5	1.49	1.14	1.58	1.24	0,0,0/c1	Fin-specific	no-mutants
FSTL4	0	0.03	0.18	0.78	0.3	0.66	1.06	1	1.48	0.55	0,0,0/c1	Fin-specific	probably-unrelated
LOC103189113	-	-	-	-	0.34	0.84	0.71	1.22	1.45	1.44	0,0,0/c1	Fin-specific	no-mutants
MFSD4A	0.25	0.09	0.24	0.3	0.59	1.16	1.96	1.1	2.5	1.44	0,0,0/c1	Fin-specific	no-mutants
LOC102355288	-	-	-	-	3.57	3.47	5.18	5.34	8.73	7.72	0,0,0/c1	Fin-specific	no-mutants
FBXL13	0.01	0.01	0.02	0.06	0.68	1.57	1.24	2.43	2.96	3.44	0,0,0/c1	Fin-specific	no-mutants
ERBB4	0.01	0.02	0.1	0.45	2.43	3.43	3.3	3.19	6.56	6.11	0,0,0/c1	Fin-specific	embryonic lethality during organogenesis, complete penetrance
HSF2BP	0.25	0.32	0.06	0.35	3.6	2.49	3.13	4.62	7.46	7.08	0,0,0/c1	Fin-specific	polydactyly
LOC103179535	-	-	-	-	0.13	0.32	0.66	1.17	1.16	0.15	0,0,0/c1	Fin-specific	no-mutants
ZAR1	0.05	0.06	0.5	0.45	1.89	2.24	8.82	11	12.54	8.29	0,0,0/c1	Fin-specific	probably-unrelated
HNMT	0.37	0.16	0.26	0.64	0.17	0.76	0.88	1.17	1.68	0.78	0,0,0/c1	Fin-specific	probably-unrelated
LOC102345127	-	-	-	-	4.72	6.04	6.38	7.39	16.19	5.91	0,0,0/c1	Fin-specific	no-mutants
ITIH3	0	0	0.06	0.02	2.84	5.23	6.17	6.59	11.8	10.78	0,0,0/c1	Fin-specific	no-mutants
FGB	0.17	0.02	0.34	0	0.13	1.65	1.65	1.29	3.08	0.76	0,0,0/c1	Fin-specific	probably-unrelated
ZNF469	-	-	-	-	3.51	5.53	4.46	8.03	11.5	10.92	0,0,0/c1	Fin-specific	no-mutants
LOC103182084	-	-	-	-	1.42	3.55	2.4	4.07	6.19	1.51	0,0,0/c1	Fin-specific	no-mutants
LOC103174843	-	-	-	-	1.79	2.92	3.58	6.39	5.94	7.45	0,0,0/c1	Fin-specific	no-mutants
ATP6V1C2	0.16	0.15	0	0.03	0.58	0.94	0.87	0.99	1.73	1.46	0,0,0/c1	Fin-specific	no-mutants
ZNF516	-	-	-	-	0.43	0.64	1.61	1.89	2.18	2.32	0,0,0/c1	Fin-specific	no-mutants
ITIH2	0.03	0	0.01	0.04	0.08	0.43	1.23	0.86	1.48	0.94	0,0,0/c1	Fin-specific	no-mutants
LOC102356870	-	-	-	-	0.28	0.81	2.12	3.42	3.43	2.48	0,0,0/c1	Fin-specific	no-mutants
LOC102357026	-	-	-	-	1.16	2.22	2.55	2.6	4.42	4.15	0,0,0/c1	Fin-specific	no-mutants
SLC15A1	0.01	0.01	0.03	0.03	1.15	2.04	2.78	3.84	3.7	5.36	0,0,0/c1	Fin-specific	probably-unrelated
LOC102350046	-	-	-	-	9.54	14.44	25.72	30.1	30.23	46.17	0,0,0/c1	Fin-specific	no-mutants
MYOCD	0.02	0.02	0.14	0.55	0.39	0.54	1.33	1.53	1.56	2.11	0,0,0/c1	Fin-specific	embryonic lethality during organogenesis, complete penetrance,embryonic lethality, complete penetrance
LPAR3	0.55	0.37	0.48	0.46	0.5	0.45	0.54	0.88	1.31	1.58	0,0,0/c1	Fin-specific	probably-unrelated
LOC102573238	-	-	-	-	0.63	0.72	0.56	0.83	1.6	1.8	0,0,0/c1	Fin-specific	no-mutants
LOC102345597	-	-	-	-	0.28	0.74	1.62	2.31	1.49	2.58	0,0,0/c1	Fin-specific	no-mutants
FTL	-	-	-	-	4.6	7.62	9.92	12.99	13.18	20.71	0,0,0/c1	Fin-specific	no-mutants
RASAL1	0.08	0.05	0.14	0.36	0.65	1.17	2.1	2.67	2.47	3.9	0,0,0/c1	Fin-specific	no-mutants
ADGRA1	0	0.01	0.02	0.01	1.75	2.47	9.3	14.53	11.22	17.27	0,0,0/c1	Fin-specific	probably-unrelated
NPBWR2	-	-	-	-	0.15	0.22	0.99	1.89	0.73	1.59	0,0,0/c1	Fin-specific	no-mutants
KL	0	0	0.06	0.13	0.22	0.61	1.23	3.26	2.29	3.16	0,0,0/c1	Fin-specific	abnormal autopod morphology,abnormal femur morphology
LOC103177777	-	-	-	-	0.47	0.84	0.86	1.35	1.19	1.92	0,0,0/c1	Fin-specific	no-mutants
FOXO6	0.35	0.25	0.36	0.91	0.36	0.23	0.63	0.63	0.84	1.13	0,0,0/c1	Fin-specific	probably-unrelated
C1QTNF12	-	-	-	-	0.83	0.99	1.17	0.98	1.99	2.75	0,0,0/c1	Fin-specific	no-mutants
LINGO3	0.18	0.28	0.36	0.59	0.06	0.1	0.62	1.07	0.44	0.99	0,0,0/c1	Fin-specific	no-mutants
EHF	0.01	0	0.06	0.09	1.66	6.98	4.43	12.27	11.47	15.1	0,0,0/c1	Fin-specific	no-mutants
ABCB5	0.01	0.01	0.01	0.01	0.01	1.01	1.01	3.77	3.07	4.01	0,0,0/c1	Fin-specific	no-mutants
SOHO	-	-	-	-	0.39	2.04	1.56	2.14	2.86	3.79	0,0,0/c1	Fin-specific	no-mutants
LOC102363628	-	-	-	-	0.25	0.86	1.64	2.21	1.87	2.65	0,0,0/c1	Fin-specific	no-mutants
ZNF488	-	-	-	-	0.28	0.15	0.38	0.89	0.8	1	0,0,0/c1	Fin-specific	no-mutants
ALOXE3	0.3	0.09	0.09	0.15	0.91	2.38	4.81	7.77	7.68	10.47	0,0,0/c1	Fin-specific	probably-unrelated
SYN3	0.07	0.24	0.57	0.73	0.88	1.05	2.22	2.24	3.38	4.15	0,0,0/c1	Fin-specific	probably-unrelated
LOC103191542	-	-	-	-	62.16	154.1	224.04	298.76	388.72	495.19	0,0,0/c1	Fin-specific	no-mutants
LOC103182679	-	-	-	-	0.28	5.42	2.63	5.02	7.73	9.1	0,0,0/c1	Fin-specific	no-mutants
CACNG5	0	0.02	0.02	0.09	0.41	0.59	1.04	0.89	1.52	1.84	0,0,0/c1	Fin-specific	no-mutants
FOXL2	0.13	0.28	0.02	0.25	0.25	0.27	0.72	0.93	0.71	1.24	0,0,0/c1	Fin-specific	probably-unrelated
LOC102346001	-	-	-	-	0.94	1.13	2	2.22	3.05	3.95	0,0,0/c1	Fin-specific	no-mutants
GCNT4	0.26	0.46	0.54	0.41	0.1	0.6	0.55	0.94	0.89	1.41	0,0,0/c1	Fin-specific	probably-unrelated
MUC16	-	-	-	-	11.72	14.78	8.56	16.62	28.24	6.02	0,0,0/c1	Fin-specific	probably-unrelated
LOC106703688	-	-	-	-	28.82	50.35	54.54	78.48	75.34	98.88	0,0,0/c1	Fin-specific	no-mutants
KCNV1	0.01	0.01	0.01	0.05	0.57	0.53	0.59	0.7	1.35	1.15	0,0,0/c1	Fin-specific	probably-unrelated
LOC102353775	-	-	-	-	0.78	1.54	2.88	4.22	3.55	3.67	0,0,0/c1	Fin-specific	no-mutants
GSL	-	-	-	-	25.63	33.8	41.01	42.49	66.7	75.62	0,0,0/c1	Fin-specific	no-mutants
AR	0.01	0.01	0.03	0.09	0.76	0.76	1.43	1.62	1.46	2.12	0,0,0/c1	Fin-specific	polydactyly,syndactyly
TMEM233	0	0.07	0.06	0.3	0.33	1.27	0.93	1.45	1.24	1.86	0,0,0/c1	Fin-specific	no-mutants
LMOD1	0.18	0.1	0.17	0.4	0.48	0.12	1.52	1.74	1.22	1.62	0,0,0/c1	Fin-specific	no-mutants
RIPOR1	-	-	-	-	3.76	6.09	9.21	10.24	10.48	13.83	0,0,0/c1	Fin-specific	no-mutants
DNAH2	0.04	0.05	0.12	0.18	0.81	3.09	1.7	4.3	3.12	4.53	0,0,0/c1	Fin-specific	no-mutants
PLEKHG6	0.31	0.29	0.34	0.66	19.4	12.03	19.26	24.06	36.58	40.7	0,0,0/c1	Fin-specific	no-mutants
LOC102349279	-	-	-	-	0.62	0.29	0.41	0.79	1.23	1.12	0,0,0/c1	Fin-specific	no-mutants
LOC102567351	-	-	-	-	0.65	0.59	0.66	1.16	1.06	1.5	0,0,0/c1	Fin-specific	no-mutants
KIAA1211L	-	-	-	-	0.82	0.06	0.66	0.63	1.49	0.81	0,0,0/c1	Fin-specific	no-mutants
XIRP2	0	0	0	0	2.75	7.28	15.56	24.1	19.39	17.65	0,0,0/c1	Fin-specific	probably-unrelated
EPHA8	0.02	0.32	0.37	0.21	0.41	0.92	1.47	3.2	2.63	3.19	0,0,0/c1	Fin-specific	probably-unrelated
RHOGL	-	-	-	-	0.71	1.51	2.33	2.97	2.06	3.51	0,0,0/c1	Fin-specific	no-mutants
RHOH	0.03	0.1	0.09	0.33	0.55	0.36	0.38	0.61	1.08	1.22	0,0,0/c1	Fin-specific	probably-unrelated
RASGEF1A	0	0	0.03	0.03	1.64	2.2	2.74	3.18	4.87	5.39	0,0,0/c1	Fin-specific	no-mutants
ANO5	0.01	0.04	0.06	0.23	0.71	0.84	0.42	0.93	1.52	1.6	0,0,0/c1	Fin-specific	probably-unrelated
LOC103182545	-	-	-	-	0.38	0.5	0.26	0.68	1.02	1	0,0,0/c1	Fin-specific	no-mutants
PTX4	0.02	0.02	0.03	0.25	0.18	0.46	0.44	1.78	1.38	1.29	0,0,0/c1	Fin-specific	no-mutants
LRTM1	0.02	0.08	0.09	0.35	0.73	0.91	2.21	1.94	2.19	3.1	0,0,0/c1	Fin-specific	no-mutants
LOC102358659	-	-	-	-	1.66	1.88	2.14	2.32	4.1	4.85	0,0,0/c1	Fin-specific	no-mutants
TTN	0.01	0.01	0.11	0.75	1.59	5.45	14.86	55.31	35.96	27.42	0,0,0/c1	Fin-specific	embryonic lethality during organogenesis, incomplete penetrance,embryonic lethality during organogenesis, complete penetrance,embryonic lethality, complete penetrance
MYH7B	0.21	0.06	0.17	0.65	0.27	4.84	3.98	26.08	19.38	9.27	0,0,0/c1	Fin-specific	no-mutants
DMRT1	0.03	0.02	0.09	0.11	0.2	0.15	1.19	1.62	1.04	1.53	0,0,0/c1	Fin-specific	probably-unrelated
MAPT	0.18	0.21	0.6	0.76	0.47	1	0.33	1.05	1.14	1.53	0,0,0/c1	Fin-specific	probably-unrelated
LOC103190098	-	-	-	-	0.13	0.96	0.74	0.17	1.14	1.4	0,0,0/c1	Fin-specific	no-mutants
CASTOR1	-	-	-	-	0.89	1.48	2.16	2.45	2.95	2.55	0,0,0/c1	Fin-specific	probably-unrelated
SYT8	0.02	0.11	0	0	2.27	5.03	5.35	5.62	7.4	7.16	0,0,0/c1	Fin-specific	no-mutants
LOC103178590	-	-	-	-	0.35	0.69	0.48	1.12	1.14	0.78	0,0,0/c1	Fin-specific	no-mutants
IL4R	-	-	-	-	0.78	1.39	2.41	2.52	3.12	2.96	0,0,0/c1	Fin-specific	no-mutants
CCN1	-	-	-	-	11.46	22.49	32.59	33.15	40.18	41.1	0,0,0/c1	Fin-specific	no-mutants
SLC6A14	0	0.02	0.46	0.49	5.16	10.92	10.61	18.07	16.03	14.88	0,0,0/c1	Fin-specific	probably-unrelated
VGLL1	0.03	0.42	0.7	0.62	3.61	7.09	10.67	9.78	12.09	13.26	0,0,0/c1	Fin-specific	no-mutants
LOC102364054	-	-	-	-	1.8	2.73	4.61	4.23	5.88	5.51	0,0,0/c1	Fin-specific	no-mutants
RIPOR3	-	-	-	-	0.94	1.41	1.63	1.83	2.51	2.22	0,0,0/c1	Fin-specific	no-mutants
LOC103175281	-	-	-	-	1.07	1.63	1.87	2.61	2.87	2.31	0,0,0/c1	Fin-specific	no-mutants
LOC102346791	-	-	-	-	25.8	33.03	52.15	55.21	68.04	55.76	0,0,0/c1	Fin-specific	no-mutants
AGR3	0	0	0.05	0.06	22.76	206.46	164.43	294	289.06	204.53	0,0,0/c1	Fin-specific	no-mutants
SOWAHA	0.12	0.18	0.13	0.13	3.7	4.44	5.73	5.51	8.46	7.84	0,0,0/c1	Fin-specific	no-mutants
SYNM	0.06	0.03	0.12	0.32	1.1	2.72	4.19	5.3	4.59	4.83	0,0,0/c1	Fin-specific	probably-unrelated
CYP2G1	0	0	0	0	3.1	5.07	7.05	7.57	7.57	8.74	0,0,0/c1	Fin-specific	probably-unrelated
NAGS	0.03	0.12	0.04	0.02	1.35	1.43	2.01	2.18	2.63	2.9	0,0,0/c1	Fin-specific	probably-unrelated
LOC102348815	-	-	-	-	2.25	3.98	4.82	5.28	7.23	7.06	0,0,0/c1	Fin-specific	no-mutants
LOC102366250	-	-	-	-	0.4	0.91	0.8	1.09	1.53	1.17	0,0,0/c1	Fin-specific	no-mutants
ATP10B	0	0.03	0.25	0.69	0.5	1.08	0.99	1.35	1.8	1.1	0,0,0/c1	Fin-specific	no-mutants
SLC39A4	0.2	0.19	0.28	0.09	2.97	4.3	4.78	9.52	9.6	8.8	0,0,0/c1	Fin-specific	embryonic lethality during organogenesis, incomplete penetrance,embryonic lethality during organogenesis, complete penetrance
WDFY4	0.04	0.22	0.37	0.47	3.01	2.85	4.23	5.27	7.62	5.4	0,0,0/c1	Fin-specific	no-mutants
DHRS9	0.06	0	0.01	0.03	0.7	1.49	1.66	1.64	2.41	1.55	0,0,0/c1	Fin-specific	no-mutants
LOC102362177	-	-	-	-	0.83	1.05	1.33	1.48	2.12	2.18	0,0,0/c1	Fin-specific	no-mutants
LOC102346373	-	-	-	-	0.21	0.73	0.83	1.05	1.34	0.67	0,0,0/c1	Fin-specific	no-mutants
TMPRSS13	0.95	0.72	0.54	0.94	3.07	5.41	5.37	9.89	8.95	9.23	0,0,0/c1	Fin-specific	probably-unrelated
FAM107A	0.12	0.92	0.87	0.8	2.05	4.13	4.26	4.97	7.34	5.79	0,0,0/c1	Fin-specific	no-mutants
FAT2	0.3	0.29	0.47	0.94	5.65	5.22	6.32	7.64	10.9	7.52	0,0,0/c1	Fin-specific	probably-unrelated
ASCL1	0.18	0.36	0.39	0.04	1.51	2.58	2.39	3.43	3.07	4.05	0,0,0/c1	Fin-specific	probably-unrelated
P2RX2	0.06	0.12	0.3	0.47	1.1	1.65	2.65	1.78	3.08	2.54	0,0,0/c1	Fin-specific	probably-unrelated
LOC102363008	-	-	-	-	13.48	16.47	22.42	20.24	29.77	33.33	0,0,0/c1	Fin-specific	no-mutants
COL6A4	0	0	0.02	0.16	8.1	4.96	8.83	13.64	14.16	15.37	0,0,0/c1	Fin-specific	no-mutants
LOC103185676	-	-	-	-	1.1	1.2	1.39	1.28	2.31	1.82	0,0,0/c1	Fin-specific	no-mutants
HMX1	0.35	0.42	0.34	0.03	0.06	0.84	0.9	1.15	1.03	1.26	0,0,0/c1	Fin-specific	probably-unrelated
FGF14	0.01	0.1	0.03	0.3	1.1	0.8	1.75	2.46	2.68	2.77	0,0,0/c1	Fin-specific	probably-unrelated
COL5A3	0.04	0.03	0.12	0.25	26.31	37.13	66.98	68.8	75.94	86.09	0,0,0/c1	Fin-specific	probably-unrelated
BBOX1	0	0.04	0.13	0.33	5.3	9.44	12.58	13.65	15.14	17.57	0,0,0/c1	Fin-specific	probably-unrelated
CUNH1ORF210	-	-	-	-	0.49	1.31	1.26	1.33	1.85	1.47	0,0,0/c1	Fin-specific	no-mutants
GSTO2	0.51	0.59	0.42	0.54	9.61	44.82	88.22	81.83	91.8	98.91	0,0,0/c1	Fin-specific	probably-unrelated
LOC102357877	-	-	-	-	1.33	2.48	1.86	3.09	3.78	3.05	0,0,0/c1	Fin-specific	no-mutants
LOC103186466	-	-	-	-	1.84	5.5	6.15	6.71	8.84	6.45	0,0,0/c1	Fin-specific	no-mutants
TEDDM3	0	0	0	0	0.94	0.94	1.34	1.62	1.85	2.14	0,0,0/c1	Fin-specific	no-mutants
SLC9A3	0	0	0	0	3.03	6.62	12.5	14.44	15.67	12.64	0,0,0/c1	Fin-specific	probably-unrelated
LOC103177599	-	-	-	-	2.8	4.17	3.65	5.89	7.16	6.81	0,0,0/c1	Fin-specific	no-mutants
LOC102574423	-	-	-	-	3.4	3.57	3.39	6.26	7.51	6.01	0,0,0/c1	Fin-specific	no-mutants
SLC6A2	0.26	0.28	0.06	0.04	4.41	4.47	9.17	11.75	12.53	8.88	0,0,0/c1	Fin-specific	probably-unrelated
OVOL1	0.19	0.63	0.84	0.81	3.17	4.85	5.82	5.85	8.16	8.77	0,0,0/c1	Fin-specific	probably-unrelated
GCNT7	0	0	0	0	3.56	4.6	5.61	6.07	8.39	8.23	0,0,0/c1	Fin-specific	no-mutants
GRIK3	0.01	0.02	0.03	0.22	0.44	0.89	1.19	1.6	1.34	1.67	0,0,0/c1	Fin-specific	probably-unrelated
LOC102363141	-	-	-	-	0.38	0.54	0.94	0.74	1.16	1.13	0,0,0/c1	Fin-specific	no-mutants
OPCML	0.07	0.1	0.11	0.49	0	0.9	2.09	1.53	1.54	1.56	0,0,0/c1	Fin-specific	no-mutants
TMEM52	0	0	0	0.06	1.95	10.03	25.62	16.81	22.03	11.04	0,0,0/c1	Fin-specific	no-mutants
LOC103188789	-	-	-	-	1.64	1.52	0.94	2.02	3.25	0.66	0,0,0/c1	Fin-specific	no-mutants
LOC103175536	-	-	-	-	0.7	0.34	0.52	0.96	1.11	1.12	0,0,0/c1	Fin-specific	no-mutants
RNF17	0.62	0.44	0.3	0.44	1.64	1.45	1.39	1.3	2.78	1.54	0,0,0/c1	Fin-specific	probably-unrelated
LOC106737623	-	-	-	-	1.61	4.51	9.44	5.75	8.44	6.48	0,0,0/c1	Fin-specific	no-mutants
CYP1A1	0.24	0.04	0.02	0.02	0.69	9.68	15.23	9.07	10.22	13.18	0,0,0/c1	Fin-specific	probably-unrelated
NOXA1	0.04	0.12	0.05	0.06	9.22	13.07	14.77	14.68	18.86	23.45	0,0,0/c1	Fin-specific	probably-unrelated
PCLO	0.04	0.05	0.08	0.15	5.85	6.28	4.97	6.31	11.57	5.98	0,0,0/c1	Fin-specific	probably-unrelated
LOC106705774	-	-	-	-	98.4	98.05	249.04	100.33	213.39	164.79	0,0,0/c1	Fin-specific	no-mutants
HPX	0.02	0.03	0.03	0.03	0.3	0.96	0.97	0.84	1.3	0.91	0,0,0/c1	Fin-specific	probably-unrelated
FOLH1	0.01	0.01	0	0.08	4	5.38	6.78	7.49	8.52	10.61	0,0,0/c1	Fin-specific	probably-unrelated
WDR72	0.02	0.02	0.4	0.27	0.92	1.13	1.84	1.23	2.35	1.14	0,0,0/c1	Fin-specific	probably-unrelated
ZNF232	-	-	-	-	1.38	1.07	0.92	0.98	2.3	1.91	0,0,0/c1	Fin-specific	no-mutants
GABRA2	0.07	0.45	0.33	0.53	3.49	3.46	7.29	6.14	9.12	4.64	0,0,0/c1	Fin-specific	probably-unrelated
HIVEP3	0.01	0.04	0.07	0.17	2.4	2.72	4.14	3.25	4.57	5.68	0,0,0/c1	Fin-specific	polydactyly
VIT	0.02	0.01	0.02	0.07	16.08	16.21	29.12	32.5	36.88	43.11	0,0,0/c1	Fin-specific	probably-unrelated
ELAVL4	0.33	0.66	0.82	0.83	1.59	1.37	1.88	2.63	2.9	3.34	0,0,0/c1	Fin-specific	probably-unrelated
SOX2	0.06	0.47	0.66	0.66	0.34	0.75	1.39	1.13	1.26	1.69	0,0,0/c1	Fin-specific	embryonic lethality between implantation and placentation, complete penetrance,embryonic lethality between implantation and somite formation, complete penetrance
SCEL	0.01	0	0.17	0.87	28.8	68.22	75.4	56.96	110.66	76.14	0,0,0/c1	Fin-specific	probably-unrelated
LOC102357543	-	-	-	-	7.82	11.93	15.01	13.96	19.39	22.99	0,0,0/c1	Fin-specific	no-mutants
MGAT4E	0	0	0	0	2.15	3.29	4.09	4.19	6.04	3.56	0,0,0/c1	Fin-specific	no-mutants
ARAP2	0.15	0.12	0.28	0.53	0.7	0.23	1.17	1.55	1.16	1.51	0,0,0/c1	Fin-specific	probably-unrelated
TLR3	0.13	0.39	0.68	0.71	3.45	3.2	3.14	3.46	6.6	4.71	0,0,0/c1	Fin-specific	probably-unrelated
TNFSF13B	0.08	0	0.08	0.35	2.05	3.2	4.58	3.9	5.73	2.83	0,0,0/c1	Fin-specific	probably-unrelated
LOC103190767	-	-	-	-	1.41	2.09	2.23	1.71	3.73	1.84	0,0,0/c1	Fin-specific	no-mutants
LOC102560789	-	-	-	-	27.53	31.8	33.81	35.79	58.29	53.07	0,0,0/c1	Fin-specific	no-mutants
SOX3	0.18	0.22	0.1	0.05	5.05	9.38	10.75	13.47	13.9	16.8	0,0,0/c1	Fin-specific	probably-unrelated
VTN	0	0.2	0.03	0.03	0.65	0.91	1.29	1.09	1.69	1.01	0,0,0/c1	Fin-specific	probably-unrelated
LOC102362489	-	-	-	-	1.56	5.13	4.78	4.95	6.69	4.84	0,0,0/c1	Fin-specific	no-mutants
LOC102347832	-	-	-	-	3.46	4.21	6.42	7.39	7.72	9.47	0,0,0/c1	Fin-specific	no-mutants
AOC3	0.03	0.03	0.01	0.13	13.18	10.95	20.9	23.33	25.3	29.29	0,0,0/c1	Fin-specific	probably-unrelated
LOC102351334	-	-	-	-	4.43	5.4	5.72	4.24	10.36	1.71	0,0,0/c1	Fin-specific	no-mutants
LOC102352912	-	-	-	-	18.62	13.82	30.1	36.32	39.83	44.69	0,0,0/c1	Fin-specific	no-mutants
SHOX	-	-	-	-	13.39	14.22	42.69	46.82	43.67	46.27	0,0,0/c1	Fin-specific	no-mutants
RLN3	0.07	0	0	0	0.09	1.12	1.07	1.51	1.51	0.88	0,0,0/c1	Fin-specific	probably-unrelated
GPR160	0.05	0.16	0.24	0.67	1.23	3.87	3.78	3.55	5.25	3.15	0,0,0/c1	Fin-specific	no-mutants
KCNC3	0.16	0.19	0.21	0.18	0.87	0.7	1.49	1.34	1.59	1.97	0,0,0/c1	Fin-specific	probably-unrelated
LOC106703930	-	-	-	-	0.6	0.51	1.2	0.44	1.01	1.08	0,0,0/c1	Fin-specific	no-mutants
LOC102576705	-	-	-	-	1.9	2.25	2.94	2.98	3.02	4.27	0,0,0/c1	Fin-specific	no-mutants
LOC103180449	-	-	-	-	0.76	1.24	2.02	1.31	1.85	2.28	0,0,0/c1	Fin-specific	no-mutants
LOC107076967	-	-	-	-	8.13	35.48	31.26	25.11	40.45	25.83	0,0,0/c1	Fin-specific	no-mutants
LOC102359280	-	-	-	-	1.48	1.69	1.95	1.91	2.75	3.24	0,0,0/c1	Fin-specific	no-mutants
NR1D1	0.58	0.7	0.88	0.62	0.7	0.56	0.88	0.86	1	1.28	0,0,0/c1	Fin-specific	probably-unrelated
TMEM198	0.18	0.15	0.23	0.17	9.82	9.33	13.52	14.41	14.22	19.3	0,0,0/c1	Fin-specific	no-mutants
IL17REL	-	-	-	-	0.91	2.33	1.68	1.62	2.75	1.89	0,0,0/c1	Fin-specific	no-mutants
LOC102366343	-	-	-	-	0.27	0.7	1.12	1.29	1.16	0.8	0,0,0/c1	Fin-specific	no-mutants
LOC102362716	-	-	-	-	10.19	7.55	12.29	14.6	13.94	18.61	0,0,0/c1	Fin-specific	no-mutants
LOC102346777	-	-	-	-	14.01	21.43	42.54	38.74	29.35	32.86	0,0,0/c1	Fin-specific	no-mutants
LOC102363937	-	-	-	-	4.14	7.51	9.12	13.57	11.71	6.99	0,0,0/c1	Fin-specific	no-mutants
LOC103172777	-	-	-	-	3.43	2.2	3.92	1.82	4.66	1.68	0,0,0/c1	Fin-specific	no-mutants
LOC102348705	-	-	-	-	4.47	6.63	4.01	5.26	8.57	3.98	0,0,0/c1	Fin-specific	no-mutants
CNTN4	0.01	0.02	0.2	0.49	0.86	1.79	2.58	2.08	1.74	2.97	0,0,0/c1	Fin-specific	probably-unrelated
LOC102345506	-	-	-	-	1.05	0.83	1.09	0.72	1.79	0.66	0,0,0/c1	Fin-specific	no-mutants
AGER	0.41	0.18	0.16	0.46	0.88	3.32	5.52	3.92	3.26	5.69	0,0,0/c1	Fin-specific	probably-unrelated
CLIC2	-	-	-	-	0.44	1.6	0.64	1.15	1.24	1.37	0,0,0/c1	Fin-specific	no-mutants
LOC102367383	-	-	-	-	1.3	1.21	1.6	1.24	2.25	1.28	0,0,0/c1	Fin-specific	no-mutants
LOC103186529	-	-	-	-	2.54	3.28	6.35	7.33	4.95	5.99	0,0,0/c1	Fin-specific	no-mutants
CAPN9	0	0.02	0.02	0.08	31.56	59.68	81.66	66.34	90.11	64.67	0,0,0/c1	Fin-specific	probably-unrelated
LOC107076909	-	-	-	-	0.4	0.57	1.28	0.97	1.07	1.02	0,0,0/c1	Fin-specific	no-mutants
LOC102365218	-	-	-	-	2.91	3.47	4.2	5	4.95	6.18	0,0,0/c1	Fin-specific	no-mutants
PCDH11X	0.08	0.2	0.15	0.27	0.99	1.14	2.26	2.53	1.92	2.6	0,0,0/c1	Fin-specific	no-mutants
LOC103176047	-	-	-	-	1.26	1.49	1.99	1.93	2.1	2.59	0,0,0/c1	Fin-specific	no-mutants
FMN1	0.66	0.37	0.86	0.79	5.07	6.54	9.29	7.1	10.1	7.07	0,0,0/c1	Fin-specific	abnormal limb development,oligodactyly,fused phalanges,abnormal ulna morphology,abnormal digit morphology,abnormal limb morphology,syndactyly,short limbs,abnormal hindlimb morphology,abnormal tibia morphology,abnormal fibula morphology,abnormal autopod morphology,abnormal radius morphology,abnormal forelimb morphology
LOC103178319	-	-	-	-	0.69	0.52	0.88	0.78	1.17	1.13	0,0,0/c1	Fin-specific	no-mutants
MYO5C	0.09	0.04	0.11	0.12	0.83	1.33	1.25	1.15	1.95	1.62	0,0,0/c1	Fin-specific	no-mutants
RUBCNL	0.06	0.04	0.32	0.76	1.01	0.82	1.4	1.27	1.74	1.38	0,0,0/c1	Fin-specific	no-mutants
CPB1	0.06	0	0.05	0.1	1.04	3.79	5.02	5.58	5.52	4.72	0,0,0/c1	Fin-specific	no-mutants
ZNF704	-	-	-	-	0.75	1.11	1.92	1.11	1.53	1.78	0,0,0/c1	Fin-specific	no-mutants
LOC102367213	-	-	-	-	23.89	18.27	27.88	25.98	34.54	40.53	0,0,0/c1	Fin-specific	no-mutants
LOC771494	-	-	-	-	4.33	2.83	5.4	5.27	7.44	3.95	0,0,0/c1	Fin-specific	no-mutants
SCN1A	0.02	0.05	0.16	0.22	0.91	1.16	0.82	0.83	1.5	1.71	0,0,0/c1	Fin-specific	maximal tonic hindlimb extension seizures
NPB	0	0	0.16	0.59	0.81	1.32	2.27	1.44	1.53	1.9	0,0,0/c1	Fin-specific	probably-unrelated
SHC4	0.68	0.57	0.56	0.76	2.98	2.25	2.89	3.08	4.45	4.87	0,0,0/c1	Fin-specific	no-mutants
LOC102356093	-	-	-	-	8.47	8.6	10.5	9.62	15.19	9.44	0,0,0/c1	Fin-specific	no-mutants
CYP46A1	0.13	0.19	0.19	0.67	3.68	6.26	10.61	7.25	9.37	7.32	0,0,0/c1	Fin-specific	probably-unrelated
LOC103190735	-	-	-	-	1.85	3.82	2.45	3.55	4.64	3.5	0,0,0/c1	Fin-specific	no-mutants
LOC106707005	-	-	-	-	2.03	1.35	2.84	1.69	2.99	3.45	0,0,0/c1	Fin-specific	no-mutants
GDPD4	0	0	0	0	1.68	2.8	4.59	2.95	4.31	2.87	0,0,0/c1	Fin-specific	no-mutants
SLC45A1	0.12	0.17	0.74	0.59	1.59	1.35	1.76	2.85	2.38	2.22	0,0,0/c1	Fin-specific	no-mutants
CHST9	0.1	0.03	0.39	0.5	5.86	6.79	9.78	10.33	9.75	12.72	0,0,0/c1	Fin-specific	no-mutants
TMPRSS4	0.3	0.37	0.26	0.19	0.94	1.37	2.13	2.61	2.66	2.78	0,0,0/c1	Fin-specific	probably-unrelated
ZMAT4	0.27	0.86	0.48	0.82	0.46	0.8	1.06	1.1	1.11	1.41	0,0,0/c1	Fin-specific	no-mutants
LOC102345670	-	-	-	-	17.1	21.81	27.21	23.99	39.64	35.07	0,0,0/c1	Fin-specific	no-mutants
SLCO4A1	0.19	0.14	0.17	0.15	1.14	1.58	2.27	1.62	2.9	2.42	0,0,0/c1	Fin-specific	no-mutants
LOC102355620	-	-	-	-	1.9	2.55	4.38	3.78	5.13	4.71	0,0,0/c1	Fin-specific	no-mutants
MCF2	0.07	0.03	0.15	0.26	0.92	1.18	1.55	1.2	2.13	1.65	0,0,0/c1	Fin-specific	probably-unrelated
ZC3H12A	0.31	0.21	0.27	0.44	1.66	2.4	4.97	3.33	4.23	3.86	0,0,0/c1	Fin-specific	probably-unrelated
PXDNL	-	-	-	-	2.22	2.62	6.42	6.78	6.26	6.07	0,0,0/c1	Fin-specific	no-mutants
LOC103172536	-	-	-	-	3.68	15.41	23.22	13.01	22.85	23.12	0,0,0/c1	Fin-specific	no-mutants
GM4832	0	0	0	0	593.65	1253.61	1160.43	1555.39	1371.96	1799.28	0,0,0/c1	Fin-specific	no-mutants
ZNF683	-	-	-	-	0.8	1.22	0.83	1.4	1.64	1.82	0,0,0/c1	Fin-specific	no-mutants
ZFP536	0	0.05	0.3	0.87	1.71	2.02	3.44	3.25	3.45	4.29	0,0,0/c1	Fin-specific	probably-unrelated
LOC102562607	-	-	-	-	0.53	0.58	0.63	0.68	1.01	1.09	0,0,0/c1	Fin-specific	no-mutants
GSG1L2	-	-	-	-	0.35	0.58	0.88	0.66	1.02	0.7	0,0,0/c1	Fin-specific	no-mutants
PIK3C2G	0.02	0.06	0.02	0.07	0.65	0.65	0.81	0.68	1.22	0.77	0,0,0/c1	Fin-specific	probably-unrelated
METTL11B	0	0	0.17	0	2.44	3.28	4.37	4.1	4.79	5.96	0,0,0/c1	Fin-specific	no-mutants
ZDHHC23	0.22	0.61	0.64	0.61	1.31	1.41	2	1.9	2.84	1.95	0,0,0/c1	Fin-specific	probably-unrelated
LOC102349020	-	-	-	-	7.17	13.19	22.66	20.28	18.24	25.2	0,0,0/c1	Fin-specific	no-mutants
FLVCR2	-	-	-	-	5.08	5.69	9.99	6.72	11.04	12.36	0,0,0/c1	Fin-specific	probably-unrelated
NTSR1	0.23	0.04	0.02	0.14	0.48	1.23	2.71	2.45	2.14	2.57	0,0,0/c1	Fin-specific	probably-unrelated
RNF222	0.03	0.17	0.08	0.11	4.4	1.01	4.04	6.66	7.4	4.63	0,0,0/c1	Fin-specific	no-mutants
FGR	0	0.04	0.25	0.17	0.99	1.88	1.36	1	2.53	2.62	0,0,0/c1	Fin-specific	probably-unrelated
FOXE1	0	0	0	0	0.81	2.04	4.5	3.09	4.13	5.06	0,0,0/c1	Fin-specific	probably-unrelated
FAM3D	-	-	-	-	2.8	11.32	10.08	10.1	15.98	10.53	0,0,0/c1	Fin-specific	no-mutants
AIFM3	0.08	0.14	0.39	0.25	2.7	5.44	9.89	4.78	9.25	6.8	0,0,0/c1	Fin-specific	no-mutants
ADARB2	0	0	0.08	0.28	0.81	1.39	2.31	2.4	2.05	2.87	0,0,0/c1	Fin-specific	no-mutants
ITPKA	0.32	0.7	0.65	0.29	0.78	0.86	1.23	1.65	1.82	1.52	0,0,0/c1	Fin-specific	probably-unrelated
LOC102346566	-	-	-	-	42.75	85.12	78.05	102.68	110.03	110.2	0,0,0/c1	Fin-specific	no-mutants
TUBA8	0.51	0.52	0.72	0.6	18	36.23	43.16	44.27	51.92	53.49	0,0,0/c1	Fin-specific	probably-unrelated
S100Z	0	0	0	0	8.05	14.69	15.72	19.36	22.11	21.11	0,0,0/c1	Fin-specific	no-mutants
LOC103190235	-	-	-	-	743.16	1219.97	1436.56	1277.37	1793.1	1778.71	0,0,0/c1	Fin-specific	no-mutants
ICAM5	0	0	0.01	0.02	1.05	1.4	1.51	1.77	2.14	1.91	0,0,0/c1	Fin-specific	probably-unrelated
PRDM12	0.05	0	0	0	0.78	0.83	0.95	1.48	1.5	1.21	0,0,0/c1	Fin-specific	probably-unrelated
LOC102348321	-	-	-	-	621.74	947.64	1118.11	1286.15	1407.02	1356.78	0,0,0/c1	Fin-specific	no-mutants
LOC102363355	-	-	-	-	1.08	1.57	1.75	1.97	2.23	2.45	0,0,0/c1	Fin-specific	no-mutants
LOC102355548	-	-	-	-	29.99	44.41	50.73	53.68	69.89	57.28	0,0,0/c1	Fin-specific	no-mutants
RDH1	0.25	0.15	0.31	0.45	14.45	17.56	21.66	20.49	30.14	25.5	0,0,0/c1	Fin-specific	probably-unrelated
CUNH3ORF70	-	-	-	-	0.61	0.42	0.98	0.71	1.09	0.89	0,0,0/c1	Fin-specific	no-mutants
DSC1	0	0	0.02	0.07	23.15	23.48	29.6	29.54	42	40.36	0,0,0/c1	Fin-specific	probably-unrelated
LOC102356340	-	-	-	-	84.99	93.56	109.19	121.35	154.35	156.47	0,0,0/c1	Fin-specific	no-mutants
LOC103190151	-	-	-	-	4.12	7.98	10.57	9.22	11.64	9.9	0,0,0/c1	Fin-specific	no-mutants
TNFSF10	0.13	0.09	0.11	0.18	1.42	1.99	2.59	2.81	2.71	3.26	0,0,0/c1	Fin-specific	probably-unrelated
FER1L4	0.01	0	0.01	0	2.73	3.75	2.67	4.4	5.32	5.28	0,0,0/c1	Fin-specific	no-mutants
LOC106739543	-	-	-	-	57.06	62.96	81.66	83.73	109.52	110.73	0,0,0/c1	Fin-specific	no-mutants
LOC102346612	-	-	-	-	35.39	61.68	98.45	77.65	97.26	90.77	0,0,0/c1	Fin-specific	no-mutants
OLFM3	0	0.03	0.1	0.17	0.07	0.79	1.13	0.95	1.07	0.97	0,0,0/c1	Fin-specific	no-mutants
MAP1LC3C	-	-	-	-	2.98	2.9	3.87	5.81	5.49	5.48	0,0,0/c1	Fin-specific	no-mutants
MGAT4D	0	0	0	0	1.36	1.71	1.83	1.49	2.66	2.41	0,0,0/c1	Fin-specific	probably-unrelated
SLC26A4	0	0.03	0.03	0.02	3.45	8.11	11.05	9.07	11.89	8.77	0,0,0/c1	Fin-specific	probably-unrelated
LOC102569672	-	-	-	-	2.18	2.87	1.78	3.25	4.19	4.34	0,0,0/c1	Fin-specific	no-mutants
LOC102693618	-	-	-	-	0.32	0.98	1.1	1.48	1.17	1.33	0,0,0/c1	Fin-specific	no-mutants
GJC2	0.06	0.12	0.4	0.69	1.2	1.13	1.92	1.87	2.19	2.51	0,0,0/c1	Fin-specific	probably-unrelated
LOC103180169	-	-	-	-	3.33	3.61	4.52	4.11	6.51	5.48	0,0,0/c1	Fin-specific	no-mutants
RAB39	0.59	0.43	0.31	0.59	1.24	1.94	2.58	2.66	2.75	3.26	0,0,0/c1	Fin-specific	probably-unrelated
LOC102346832	-	-	-	-	0.38	0.87	1.34	1.38	1.42	1.35	0,0,0/c1	Fin-specific	no-mutants
SLC37A1	0.13	0.19	0.45	0.24	1.25	1.71	1.46	1.97	2.73	2.45	0,0,0/c1	Fin-specific	no-mutants
DSG4	0	0	0	0	16.46	20.02	27.2	22.61	35.91	32.78	0,0,0/c1	Fin-specific	probably-unrelated
ABCA15	0	0	0	0	0.92	1.13	1.28	1.88	1.95	1.52	0,0,0/c1	Fin-specific	no-mutants
LOC102351499	-	-	-	-	0.98	1.12	1.8	1.85	2.24	1.79	0,0,0/c1	Fin-specific	no-mutants
LOC102353252	-	-	-	-	2.38	5.43	5.97	7.16	7.77	7.4	0,0,0/c1	Fin-specific	no-mutants
LOC102346548	-	-	-	-	2.04	1.98	2.74	3.13	3.64	3.98	0,0,0/c1	Fin-specific	no-mutants
LOC102355770	-	-	-	-	8.88	8.81	11.56	14.76	17.09	17.69	0,0,0/c1	Fin-specific	no-mutants
LOC103174936	-	-	-	-	3.56	3.4	4.63	4.27	6.44	5.4	0,0,0/c1	Fin-specific	no-mutants
LOC102361629	-	-	-	-	14.67	31.69	27.93	27.17	33.33	29.27	0,0,0/c1	Fin-specific	no-mutants
FAM83C	0.05	0.02	0.07	0.23	2.24	3.12	3.47	3.26	4.24	3.71	0,0,0/c1	Fin-specific	no-mutants
PCDH20	0.21	0.25	0.48	0.84	2.61	2.75	3.36	3.55	4.31	4.55	0,0,0/c1	Fin-specific	no-mutants
SLC17A9	0.03	0.03	0.12	0.06	2.64	2.99	3.29	3.68	4.37	4.22	0,0,0/c1	Fin-specific	probably-unrelated
OTC	0	0	0.02	0	14.23	24.38	23.57	25.34	30.36	26.8	0,0,0/c1	Fin-specific	probably-unrelated
GRAMD2A	-	-	-	-	2.52	4.65	3.9	4.19	5.15	5.16	0,0,0/c1	Fin-specific	no-mutants
TLX2	0.02	0.27	0.09	0	2.75	3.4	4.15	4.72	5.38	4.8	0,0,0/c1	Fin-specific	embryonic lethality between implantation and somite formation, complete penetrance
C1QTNF5	0.11	0.03	0.34	0.58	31.44	43.1	46.82	52.09	68.29	55.95	0,0,0/c1	Fin-specific	probably-unrelated
ARL9	0	0	0	0	7.77	9.25	10.75	11.3	13.93	13.25	0,0,0/c1	Fin-specific	probably-unrelated
PLPBP	-	-	-	-	13.96	14.08	18.29	20.02	21.35	24.44	0,0,0/c1	Fin-specific	no-mutants
LOC102367300	-	-	-	-	12.07	18.78	16.19	15.98	23.24	23.38	0,0,0/c1	Fin-specific	no-mutants
GPA33	0.03	0.11	0.24	0.37	4.09	9.78	8.67	9.56	11.28	10.1	0,0,0/c1	Fin-specific	probably-unrelated
AVIL	0.03	0.02	0.04	0.09	54.26	59.94	75.19	80.91	94.25	88.88	0,0,0/c1	Fin-specific	hindlimb paralysis
CCN4	-	-	-	-	2.87	8.73	11.21	9.2	10.39	11.59	0,0,0/c1	Fin-specific	no-mutants
FAM241A	-	-	-	-	3.16	4.07	5.16	4.13	4.9	6.08	0,0,0/c1	Fin-specific	no-mutants
ETNPPL	0	0	0.03	0.05	2.13	2.15	2.26	2.7	3.47	2.84	0,0,0/c1	Fin-specific	no-mutants
LOC106737710	-	-	-	-	7.58	7.5	11.05	9.8	11.36	13.24	0,0,0/c1	Fin-specific	no-mutants
ALS2CL	0.17	0.36	0.55	0.96	5.93	8.08	8.65	7.33	11.39	9.45	0,0,0/c1	Fin-specific	no-mutants
SLC12A8	0.29	0.36	0.59	0.58	1.24	1.53	1.77	1.76	2.34	1.74	0,0,0/c1	Fin-specific	probably-unrelated
ALDOB	0.46	0.11	0.32	0	22.62	24.01	28.95	32.32	34.03	40.19	0,0,0/c1	Fin-specific	probably-unrelated
FOXP4L	-	-	-	-	3.48	6.54	7.53	8.79	7.48	7.09	0,0,0/c1	Fin-specific	no-mutants
CPEB3	0.1	0.28	0.39	0.51	10.09	11.3	12.73	12.23	13.42	17.43	0,0,0/c1	Fin-specific	probably-unrelated
TM6SF2	0.22	0.03	0.09	0.13	1.32	1.7	1.71	1.87	2.05	2.49	0,0,0/c1	Fin-specific	probably-unrelated
LOC103188612	-	-	-	-	28.15	57.26	58.1	77.15	68.91	68.18	0,0,0/c1	Fin-specific	no-mutants
DGKG	0.04	0.06	0.03	0.14	1.46	1.51	1.53	2.14	2.5	2.68	0,0,0/c1	Fin-specific	no-mutants
WDR49	-	-	-	-	0.34	0.61	1.04	0.86	1	0.72	0,0,0/c1	Fin-specific	no-mutants
TMEM8	0.23	0.43	0.74	0.71	2.51	3.56	3.31	4.85	5.24	4.36	0,0,0/c1	Fin-specific	embryonic lethality, incomplete penetrance
MFSD6L	0.13	0.12	0.08	0.12	2.82	3.59	4.03	3.77	5.55	5.07	0,0,0/c1	Fin-specific	no-mutants
IFIT1BL1	0.03	0	0.07	0.69	2.16	3.07	3.73	3.35	4.76	3.91	0,0,0/c1	Fin-specific	no-mutants
PARP14	0.03	0.13	0.3	0.66	1.3	2.09	2.11	1.93	2.9	2.71	0,0,0/c1	Fin-specific	probably-unrelated
SPAG1	0.42	0.36	0.51	0.42	2.15	2.7	3	3.09	4.16	3.2	0,0,0/c1	Fin-specific	no-mutants
LOC102365447	-	-	-	-	1.14	3.8	2.65	3.38	4	3.46	0,0,0/c1	Fin-specific	no-mutants
PPARA	0.04	0.08	0.24	0.53	1.89	2.08	2.26	2.32	3.38	2.77	0,0,0/c1	Fin-specific	probably-unrelated
ANO9	0.04	0.04	0.04	0.05	0.99	0.95	1.19	1.38	1.82	1.49	0,0,0/c1	Fin-specific	no-mutants
KRT42	0.04	0.26	0.11	0.03	482.73	1416.62	2254.83	2040.27	2102.55	1736.37	0,0,0/c1	Fin-specific	no-mutants
LOC103182519	-	-	-	-	0.57	1.01	0.54	1.04	0.94	1.21	0,0,0/c1	Fin-specific	no-mutants
EGF	0.13	0.03	0.11	0.11	0.67	1.21	1.6	1.82	1.85	1.41	0,0,0/c1	Fin-specific	probably-unrelated
SYTL5	0	0.02	0.08	0.21	7.44	11.63	11.39	14.05	15.93	11.21	0,0,0/c1	Fin-specific	no-mutants
LOC102362383	-	-	-	-	0.81	1.91	2.14	1.49	2.1	2.4	0,0,0/c1	Fin-specific	no-mutants
ANKFN1	0	0.01	0.03	0.18	1.7	1.65	1.59	2.07	2.78	2.42	0,0,0/c1	Fin-specific	probably-unrelated
LOC102356559	-	-	-	-	0.84	1.23	1.56	1.65	1.96	1.44	0,0,0/c1	Fin-specific	no-mutants
XDH	0.34	0.04	0.08	0.4	9.71	9.49	12.98	14.75	16.31	17.78	0,0,0/c1	Fin-specific	probably-unrelated
TMEM179	0.04	0.03	0.02	0.1	1.35	1.23	0.97	1.27	1.97	1.59	0,0,0/c1	Fin-specific	no-mutants
RBM11	0.09	0.03	0.19	0.39	8.99	14.06	13.99	14.62	14.14	19.52	0,0,0/c1	Fin-specific	no-mutants
LOC102566026	-	-	-	-	2.92	3.65	3.36	4.17	5.5	3.66	0,0,0/c1	Fin-specific	no-mutants
RASGRP1	0.06	0.07	0.14	0.18	0.99	1.26	2.02	1.29	1.95	1.34	0,0,0/c1	Fin-specific	probably-unrelated
CDH17	0.02	0	0.16	0.9	15.67	25.27	24.46	21.33	32.92	24.58	0,0,0/c1	Fin-specific	probably-unrelated
UNC13C	0.06	0.01	0.05	0.12	0.73	1.72	2.11	2.32	1.78	1.61	0,0,0/c1	Fin-specific	probably-unrelated
MAMDC4	0.34	0.09	0.22	0.32	1.11	1.73	1.32	1.33	1.55	2.16	0,0,0/c1	Fin-specific	no-mutants
CACNA2D2	0.27	0.4	0.25	0.86	1.56	1.89	2.1	1.96	2.11	2.9	0,0,0/c1	Fin-specific	hindlimb paralysis
LOC100857197	-	-	-	-	7.44	6.7	9.33	8.78	9.4	12.32	0,0,0/c1	Fin-specific	no-mutants
GABRB1	0	0	0	0.08	0.7	0.72	1.4	0.95	1.14	1.22	0,0,0/c1	Fin-specific	probably-unrelated
MARVELD3	0.18	0.22	0.32	0.6	4.54	8.68	9.95	8.42	10.87	7.88	0,0,0/c1	Fin-specific	no-mutants
LOC102570037	-	-	-	-	0.95	0.69	1.65	1.8	1.7	1.42	0,0,0/c1	Fin-specific	no-mutants
CYP4B1	0.08	0.16	0.62	0.34	1.88	2.37	2.88	3.03	2.84	3.91	0,0,0/c1	Fin-specific	probably-unrelated
UGT3A2	0	0.04	0	0	12.06	17.17	22.89	20.67	20.04	27.47	0,0,0/c1	Fin-specific	no-mutants
FRMPD4	0.01	0.02	0.07	0.12	3.38	2.95	4.6	4.46	5.62	3.56	0,0,0/c1	Fin-specific	probably-unrelated
GNRHR1/III	-	-	-	-	1.09	0.86	1.38	1.6	1.86	1.21	0,0,0/c1	Fin-specific	no-mutants
GRIN2C	0.12	0.27	0.08	0.1	1.54	1.07	1.48	1.14	2.1	1.94	0,0,0/c1	Fin-specific	probably-unrelated
ACAD6L	-	-	-	-	8.09	9.4	10.19	8.6	13.68	10.28	0,0,0/c1	Fin-specific	no-mutants
LOC102358392	-	-	-	-	1.69	3.02	3.77	4.01	4.16	2.5	0,0,0/c1	Fin-specific	no-mutants
SFMBT2	0.34	0.24	0.34	0.64	1.26	1.3	1.85	1.5	1.63	2.29	0,0,0/c1	Fin-specific	no-mutants
ACER1	0.16	0.03	0.05	0.02	1.02	2.16	2.42	1.52	2.48	1.75	0,0,0/c1	Fin-specific	probably-unrelated
POF1B	0.05	0.04	0.25	0.58	15.31	30.01	31.48	27.01	35.18	24.1	0,0,0/c1	Fin-specific	probably-unrelated
LOC106702680	-	-	-	-	1.21	1.33	2.29	2.63	1.73	2.49	0,0,0/c1	Fin-specific	no-mutants
LOC102571787	-	-	-	-	0.99	1.29	0.94	0.79	1.33	1.61	0,0,0/c1	Fin-specific	no-mutants
LOC102568749	-	-	-	-	6.71	6.68	10.8	9.72	9.02	12.81	0,0,0/c1	Fin-specific	no-mutants
CASTOR2	-	-	-	-	2.25	5.24	4.8	4.47	4.91	3.87	0,0,0/c1	Fin-specific	no-mutants
LOC102351049	-	-	-	-	16.42	22.08	19.83	18.33	26.22	18.83	0,0,0/c1	Fin-specific	no-mutants
LOC102360316	-	-	-	-	14.4	13.05	19.42	17.77	16.06	22.87	0,0,0/c1	Fin-specific	no-mutants
SLC5A5	0.02	0.06	0.11	0.16	0.58	0.6	1.05	0.67	0.81	0.88	0,0,0/c1	Fin-specific	probably-unrelated
CAVIN2	-	-	-	-	69.16	65.76	86.92	69.03	86.18	107.27	0,0,0/c1	Fin-specific	probably-unrelated
TMEM25	0.18	0.68	0.59	0.94	1.08	1.06	1.6	1.99	1.48	1.93	0,0,0/c1	Fin-specific	no-mutants
SGPP2	0.23	0.29	0.79	0.56	4.57	4.3	5.04	5.07	6.2	7.21	0,0,0/c1	Fin-specific	probably-unrelated
ADAM33	0.01	0	0.06	0.21	1.25	2.8	3.31	2.98	2.29	3.31	0,0,0/c1	Fin-specific	probably-unrelated
PLEKHN1	0.29	0.16	0.23	0.32	2.18	2.04	2.06	2.78	3.38	2.63	0,0,0/c1	Fin-specific	no-mutants
TPPP	0.03	0.05	0.14	0.45	1.14	1.64	1.39	1.18	1.68	1.99	0,0,0/c1	Fin-specific	probably-unrelated
LOC102366536	-	-	-	-	1.47	1.75	2.76	2.6	2.32	2.99	0,0,0/c1	Fin-specific	no-mutants
LOC103182510	-	-	-	-	5.44	8.27	7.74	7.7	10.2	7.68	0,0,0/c1	Fin-specific	no-mutants
NPY5R	0	0	0.02	0.02	3.88	3.58	3.44	3.83	5.76	4.56	0,0,0/c1	Fin-specific	probably-unrelated
PAQR5	0.03	0.05	0.36	0.6	4.44	4.13	6.8	6.76	6.23	7.77	0,0,0/c1	Fin-specific	no-mutants
LOC103182499	-	-	-	-	5.94	9.96	9.14	10.97	11.79	8.24	0,0,0/c1	Fin-specific	no-mutants
LOC102356838	-	-	-	-	1.98	4.25	4.12	3.6	4.66	3.79	0,0,0/c1	Fin-specific	no-mutants
GPR158	0	0	0.01	0.01	1.57	1.47	2.9	2.2	2.53	2.66	0,0,0/c1	Fin-specific	probably-unrelated
LOC102355793	-	-	-	-	0.62	0.75	0.8	0.49	1.02	0.54	0,0,0/c1	Fin-specific	no-mutants
LOC103179747	-	-	-	-	0.47	0.99	1.29	0.99	1.31	0.57	0,0,0/c1	Fin-specific	no-mutants
IL12A	0	0	0.06	0.04	0.38	1	0.63	0.38	1	0.81	0,0,0/c1	Fin-specific	probably-unrelated
LOC102349888	-	-	-	-	0.67	1.21	0.73	0.65	1.19	1.02	0,0,0/c1	Fin-specific	no-mutants
XKRX	0.09	0.06	0.12	0.18	1.77	2.07	3.98	3.76	2.86	2.48	0,0,0/c1	Fin-specific	probably-unrelated
NXPH1	0	0	0	0.19	1.14	1.88	1.74	2.43	2.49	1.09	0,0,0/c1	Fin-specific	probably-unrelated
LOC103186765	-	-	-	-	2.81	3.2	2.95	1.95	4.41	1.47	0,0,0/c1	Fin-specific	no-mutants
LOC102351409	-	-	-	-	0.92	1.3	1.04	0.87	1.72	0.9	0,0,0/c1	Fin-specific	no-mutants
KIAA0930	-	-	-	-	3.34	4.02	4.36	5	3.87	6.37	0,0,0/c1	Fin-specific	no-mutants
JCAD	-	-	-	-	2.09	2.19	2.39	2.98	2.49	3.79	0,0,0/c1	Fin-specific	no-mutants
TFCP2L1	0.06	0.09	0.13	0.31	4.95	5.95	4.7	5.1	8.6	3.88	0,0,0/c1	Fin-specific	probably-unrelated
SOD3	1	0.23	0.18	0.28	0.34	0.73	1.01	0.6	0.64	0.9	0,0,0/c1	Fin-specific	probably-unrelated
PROC	0.04	0.04	0.1	0.06	0.96	2.27	1.29	1.27	2.52	2.11	0,0,0/c1	Fin-specific	probably-unrelated
LOC102363509	-	-	-	-	2.17	3.53	5.75	3.07	5.46	2.63	0,0,0/c1	Fin-specific	no-mutants
FAM20A	0.17	0.25	0.34	0.29	3.08	3.22	3.16	3.29	4.82	5.3	0,0,0/c1	Fin-specific	probably-unrelated
EPGN	0.02	0.17	0.15	0.25	9.58	18.97	27.68	20.82	23.74	15.33	0,0,0/c1	Fin-specific	probably-unrelated
LOC102350180	-	-	-	-	2.3	1.65	2.51	3.12	2.69	3.72	0,0,0/c1	Fin-specific	no-mutants
P2RY10	0.05	0	0.1	0.23	2.1	1.94	2.79	3.24	3.56	1.96	0,0,0/c1	Fin-specific	no-mutants
SPATA2L	0.07	0.15	0.47	0.82	1.66	2.36	2.15	2.3	3.15	1.69	0,0,0/c1	Fin-specific	no-mutants
ZNF827	-	-	-	-	0.49	1.01	1.08	1.36	1.08	0.75	0,0,0/c1	Fin-specific	no-mutants
ACKR2	0.03	0.06	0.13	0.21	0.63	1.04	1.4	0.87	0.76	1.32	0,0,0/c1	Fin-specific	probably-unrelated
LOC102346348	-	-	-	-	0.6	1.01	1.28	1.23	1.46	0.47	0,0,0/c1	Fin-specific	no-mutants
CHL1	0.12	0.17	0.61	0.87	0.58	1.05	0.73	0.41	1.07	1.22	0,0,0/c1	Fin-specific	probably-unrelated
ELOVL3	0.12	0	0	0.05	1.42	2.07	1.35	1.81	2.66	1.71	0,0,0/c1	Fin-specific	probably-unrelated
CHIT1	0	0	0.03	0.03	4.4	7.3	6	7.1	9.68	5.3	0,0,0/c1	Fin-specific	probably-unrelated
LOC102352385	-	-	-	-	4.55	3.8	4.13	5.05	6.55	7.28	0,0,0/c1	Fin-specific	no-mutants
FAM83E	0.19	0	0.03	0.02	4.5	4.53	5.41	6.3	5.93	8.01	0,0,0/c1	Fin-specific	no-mutants
KCNT1	0.01	0.01	0.01	0.06	1.57	1.07	1.93	1.24	2.44	2.23	0,0,0/c1	Fin-specific	probably-unrelated
LOC102576203	-	-	-	-	8.66	8.75	11.49	11.28	11.37	15.57	0,0,0/c1	Fin-specific	no-mutants
LOC102362284	-	-	-	-	4.42	5.72	5.89	5.53	8.69	6.02	0,0,0/c1	Fin-specific	no-mutants
LOC102574396	-	-	-	-	5.45	6.56	7.44	9.34	10.96	5.9	0,0,0/c1	Fin-specific	no-mutants
ADGRV1	0.05	0.1	0.07	0.06	1.21	0.68	1.34	1.68	1.72	0.97	0,0,0/c1	Fin-specific	probably-unrelated
SULT3A1	0	0	0	0	4.4	9.46	11.62	7.96	10.9	7.43	0,0,0/c1	Fin-specific	no-mutants
LOC102350904	-	-	-	-	78.45	56.4	77.94	84.06	96.51	118.33	0,0,0/c1	Fin-specific	no-mutants
OIT1	0	0.16	0.18	0.12	1.03	3.12	3.9	2.26	3.62	2.19	0,0,0/c1	Fin-specific	probably-unrelated
LOC103173508	-	-	-	-	9.03	6.99	8.48	6.35	12.54	13.08	0,0,0/c1	Fin-specific	no-mutants
LOC102352429	-	-	-	-	0.75	1.84	2.68	2.49	1.9	2	0,0,0/c1	Fin-specific	no-mutants
TBX22	0	0.08	0.82	0.09	7.23	6.83	4.69	5.3	6.34	13.28	0,0,0/c1	Fin-specific	probably-unrelated
AADAC	0.05	0	0.03	0.04	4.82	2.29	3.08	3.78	4.92	8.26	0,0,0/c1	Fin-specific	no-mutants
LOC102685327	-	-	-	-	4.65	60.79	2.38	61.31	4.91	16.37	0,0,0/c1	Fin-specific	no-mutants
OASL2	0.08	0.49	0.46	0.53	1.78	2.43	6.81	2.07	3.08	2.5	0,0,0/c1	Fin-specific	probably-unrelated
LOC102361179	-	-	-	-	0.68	4.43	7.29	2.77	1.24	4.19	0,0,0/c1	Fin-specific	no-mutants
LOC112532351	-	-	-	-	1.21	1.99	0.57	2.8	0.26	0.5	0,0,0/c1	Fin-specific	no-mutants
SELENBP2	0.03	0	0	0.14	0.32	1.54	0.41	0.51	0.62	1.37	0,0,0/c1	Fin-specific	no-mutants
LOC106706918	-	-	-	-	1.69	2.81	0.79	3.75	0.3	0.91	0,0,0/c1	Fin-specific	no-mutants
LOC102688303	-	-	-	-	0	1.22	0.38	0.55	0.63	0.96	0,0,0/c1	Fin-specific	no-mutants
LOC102362301	-	-	-	-	1.69	1.4	1.55	0.66	1.46	2.81	0,0,0/c1	Fin-specific	no-mutants
4932438H23RIK	0	0	0.04	0.19	0.24	1.01	0.47	0.51	0.32	0.87	0,0,0/c1	Fin-specific	no-mutants
LOC102352273	-	-	-	-	0.39	0.65	1.49	0.94	0.35	0.32	0,0,0/c1	Fin-specific	no-mutants
LOC102358117	-	-	-	-	0.76	1.92	0.85	0.51	0.95	1.3	0,0,0/c1	Fin-specific	no-mutants
SCNN1A	0.45	0.69	0.79	0.82	1.11	1.17	2.61	0.75	0.95	0.79	0,0,0/c1	Fin-specific	embryonic lethality, complete penetrance
ITGA10	0.09	0.06	0.13	0.24	1.57	1.04	0.99	1.43	1.11	2.56	0,0,0/c1	Fin-specific	probably-unrelated
LOC103172106	-	-	-	-	0.31	1.59	1.45	0.56	0.96	0.29	0,0,0/c1	Fin-specific	no-mutants
CHIA1	0	0	0.03	0	1.56	1.68	2.83	2.03	0.47	0.32	0,0,0/c1	Fin-specific	probably-unrelated
LOC107079371	-	-	-	-	5.36	8.89	14.82	8.25	2.93	5.2	0,0,0/c1	Fin-specific	no-mutants
CALCA	0.03	0	0.1	0.54	1.43	3.67	2.42	1.51	2.34	2.41	0,0,0/c1	Fin-specific	probably-unrelated
HEPHL1	0.16	0	0	0	3.46	2.27	2.47	2.65	3.02	5.14	0,0,0/c1	Fin-specific	no-mutants
CES2E	0.02	0	0.04	0.03	0.02	0.78	1	0.38	0.62	0.21	0,0,0/c1	Fin-specific	no-mutants
LOC102365928	-	-	-	-	1.41	1.52	1.15	1.3	1.09	2.38	0,0,0/c1	Fin-specific	no-mutants
A4GNT	0.01	0	0	0	0.08	0.91	2.93	2.64	0.43	0.28	0,0,0/c1	Fin-specific	probably-unrelated
LOC102351845	-	-	-	-	0.4	1.73	3.29	2.98	0.52	0.8	0,0,0/c1	Fin-specific	no-mutants
DCT	0.08	0.09	0.47	0.86	0.43	1.47	0.53	0.87	0.8	0.65	0,0,0/c1	Fin-specific	probably-unrelated
SPX	0.21	0.19	0.06	0.25	0.61	0.86	1.19	0.77	0.07	0.12	0,0,0/c1	Fin-specific	no-mutants
LOC102345352	-	-	-	-	0.38	0.44	1	0.27	0.36	0.24	0,0,0/c1	Fin-specific	no-mutants
LOC102354359	-	-	-	-	0.83	1.55	0.3	0.43	0.9	0.97	0,0,0/c1	Fin-specific	no-mutants
CCNB1IP1	0.05	0.03	0.09	0.06	4.91	4.78	9.87	4.89	0.93	3.03	0,0,0/c1	Fin-specific	probably-unrelated
MMP24	0.01	0.01	0.02	0.03	3.99	1.98	3.26	2.77	2.72	6	0,0,0/c1	Fin-specific	probably-unrelated
LOC102356596	-	-	-	-	2.66	4.24	5.24	1.29	0.76	1.43	0,0,0/c1	Fin-specific	no-mutants
PLCXD3	0.08	0.31	0.9	0.41	4.75	10.12	9.53	4.05	1.73	1.03	0,0,0/c1	Fin-specific	no-mutants
GM7173	0.06	0.04	0	0.03	0.71	1.29	1.1	0.64	0.54	0.25	0,0,0/c1	Fin-specific	no-mutants
TCTEX1D1	0.09	0.1	0.09	0.2	0.54	0.82	1.06	0.18	0.18	0.2	0,0,0/c1	Fin-specific	no-mutants
SFTPB	0.02	0	0	0.1	16.2	28.55	37.17	26.66	3.47	4.41	0,0,0/c1	Fin-specific	probably-unrelated
SOWAHD	0.19	0.03	0	0	0.97	0.7	0.68	0.58	0.48	1.49	0,0,0/c1	Fin-specific	no-mutants
ADAD1	0.09	0.3	0.17	0.41	1.33	2.09	2.79	1.89	0.7	0.45	0,0,0/c1	Fin-specific	probably-unrelated
LOC102361701	-	-	-	-	0.45	1.35	1.02	0.25	0.99	0.12	0,0,0/c1	Fin-specific	no-mutants
LOC102348100	-	-	-	-	0.56	1.25	1.3	0.61	0.1	0.56	0,0,0/c1	Fin-specific	no-mutants
LOC102357462	-	-	-	-	0.91	1.5	1.1	0.65	0.69	0.51	0,0,0/c1	Fin-specific	no-mutants
LOC103186145	-	-	-	-	0.71	0.28	1.12	0.34	0.26	0.13	0,0,0/c1	Fin-specific	no-mutants
LOC102367189	-	-	-	-	0.79	0.26	0.68	0	0.23	1.05	0,0,0/c1	Fin-specific	no-mutants
MLXIPL	0.1	0.21	0.34	0.32	1.03	0.92	1.9	0.84	0.28	0.32	0,0,0/c1	Fin-specific	probably-unrelated
ZNF277	-	-	-	-	0.78	1.53	0.63	0.29	1.22	0.14	0,0,0/c1	Fin-specific	no-mutants
LOC103182137	-	-	-	-	8.4	14.65	10.22	8.25	8.01	5.18	0,0,0/c1	Fin-specific	no-mutants
LOC102362621	-	-	-	-	0.76	1.12	0.77	0.55	0.58	0.34	0,0,0/c1	Fin-specific	no-mutants
LOC102364128	-	-	-	-	0.46	1.45	0.89	0.25	0.84	0.17	0,0,0/c1	Fin-specific	no-mutants
LOC102358108	-	-	-	-	1.13	2.55	1.95	0.23	1.28	0.29	0,0,0/c1	Fin-specific	no-mutants
DYNLT1	-	-	-	-	0.93	2.6	1.35	0.87	1.07	1.04	0,0,0/c1	Fin-specific	no-mutants
LOC102361173	-	-	-	-	0.31	1.47	1.04	0.4	0.09	0.57	0,0,0/c1	Fin-specific	no-mutants
ADGRG5	0.05	0.1	0.06	0.03	1.01	2.08	0.74	0.65	0.95	0.27	0,0,0/c1	Fin-specific	no-mutants
SEZ6	0.03	0.13	0.08	0.06	0.87	1.5	0.86	0.6	0.28	0.38	0,0,0/c1	Fin-specific	probably-unrelated
LOC102562725	-	-	-	-	1.14	0.26	0.5	0.16	0.22	1.68	0,0,0/c1	Fin-specific	no-mutants
LOC102354411	-	-	-	-	3.15	4.85	2.12	3.88	0.51	0.7	0,0,0/c1	Fin-specific	no-mutants
LRRC9	0.08	0.24	0.34	0.26	2.28	3.57	2.53	1.75	1.38	1.41	0,0,0/c1	Fin-specific	no-mutants
LOC102363694	-	-	-	-	0.87	1.44	1.51	0	0.3	0.05	0,0,0/c1	Fin-specific	no-mutants
LOC102357335	-	-	-	-	1.54	2.95	0.93	0.34	1.14	0.85	0,0,0/c1	Fin-specific	no-mutants
SGK2	0.01	0	0.03	0	0.29	1	0.24	0.12	0.12	0	0,0,0/c1	Fin-specific	no-mutants
ACOD1	0	0.02	0.02	0.09	0.6	4.38	0.08	1.04	0.31	0.1	0,0,0/c1	Fin-specific	probably-unrelated
MLANA	0.32	0.09	0	0.12	0	2.06	0	0	0.22	0.69	0,0,0/c1	Fin-specific	probably-unrelated
EDNRB2	-	-	-	-	0.42	1.31	0.24	0	0.17	0.64	0,0,0/c1	Fin-specific	no-mutants
LOC102365265	-	-	-	-	0.78	1.89	0.63	0.43	0.4	0.73	0,0,0/c1	Fin-specific	no-mutants
LOC112531714	-	-	-	-	9.31	21.32	8.88	6.47	7.04	3.65	0,0,0/c1	Fin-specific	no-mutants
LOC102355690	-	-	-	-	0.07	1.52	0.21	0.33	0.58	0.38	0,0,0/c1	Fin-specific	no-mutants
LOC102352923	-	-	-	-	4.52	27.04	7.46	11.28	10.38	7.75	0,0,0/c1	Fin-specific	no-mutants
LOC102359098	-	-	-	-	2.85	0.65	0.63	1.34	1.88	4.23	0,0,0/c1	Fin-specific	no-mutants
CALCB	0	0	0.05	0.26	0.51	5.61	0.41	0.35	0.62	1.99	0,0,0/c1	Fin-specific	no-mutants
GATD1	-	-	-	-	0	4.86	2.18	1.7	0	0	0,0,0/c1	Fin-specific	no-mutants
LOC102565696	-	-	-	-	0.26	1.81	1.01	0.04	0.21	0.38	0,0,0/c1	Fin-specific	no-mutants
LOC107049095	-	-	-	-	0.18	1.23	2.09	0	0.07	0.11	0,0,0/c1	Fin-specific	no-mutants
CIDEB	0.15	0.6	0.76	0.54	0.02	3.5	9.89	0	0.1	0.01	0,0,0/c1	Fin-specific	probably-unrelated
LOC102352149	-	-	-	-	2.28	6.91	27.88	1.45	1.8	2.01	0,0,0/c1	Fin-specific	no-mutants
LOC103173767	-	-	-	-	0.3	1.95	4.13	1.23	0.27	0.31	0,0,0/c1	Fin-specific	no-mutants
CATSPER1	0	0	0	0	0.09	3.5	9.2	2.48	2.15	0	0,0,0/c1	Fin-specific	probably-unrelated
LOC102576099	-	-	-	-	0.87	3.28	7.77	1.22	1.15	0.86	0,0,0/c1	Fin-specific	no-mutants
AOX3	0.01	0.18	0.35	0.26	0.06	1.23	0.24	0.48	0.9	0.29	0,0,0/c1	Fin-specific	no-mutants
CUNH11ORF49	-	-	-	-	2.21	4.35	1.83	1.98	1.27	2.6	0,0,0/c1	Fin-specific	no-mutants
LOC109280626	-	-	-	-	0.06	0.59	1.12	0	0.06	0	0,0,0/c1	Fin-specific	no-mutants
C1QTNF9	0.03	0.04	0.36	0.97	0.21	0.41	1.64	0.52	0.34	0.26	0,0,0/c1	Fin-specific	probably-unrelated
NIPAL1	0.16	0.15	0.32	0.97	0.14	1.95	0.57	1.27	1.06	0.95	0,0,0/c1	Fin-specific	no-mutants
LOC102362356	-	-	-	-	51.17	80.77	67.6	61.99	61.72	45.2	0,0,0/c1	Fin-specific	no-mutants
PAPLN	0.06	0.04	0.16	0.52	2.35	3.93	2.98	2.92	2.39	2.51	0,0,0/c1	Fin-specific	probably-unrelated
TMEM45B	0.51	0.39	0.38	0.36	14.75	25.66	19.29	18.57	18.07	16.14	0,0,0/c1	Fin-specific	no-mutants
TAP2	0.09	0.15	0.53	0.95	14.15	16.33	21.95	14.44	12.17	12.6	0,0,0/c1	Fin-specific	probably-unrelated
CFAP299	-	-	-	-	3.64	5.94	5.73	4.62	4.07	4.05	0,0,0/c1	Fin-specific	probably-unrelated
LOC102356457	-	-	-	-	2.81	2.59	4.29	2.74	3.24	1.91	0,0,0/c1	Fin-specific	no-mutants
FAM131C	0.21	0.16	0.64	0.75	0.79	1.17	0.83	0.87	0.82	0.73	0,0,0/c1	Fin-specific	no-mutants
LOC102355337	-	-	-	-	30.39	45.14	33.37	30.54	36.57	26.09	0,0,0/c1	Fin-specific	no-mutants
CERKL	0.02	0.02	0.07	0.06	0.8	0.77	1.16	0.67	0.78	0.57	0,0,0/c1	Fin-specific	probably-unrelated
LOC106702563	-	-	-	-	3.4	4.69	4.11	2.4	2.67	3.11	0,0,0/c1	Fin-specific	no-mutants
C9ORF72	-	-	-	-	14.9	19.88	22.98	15.38	13.72	10.38	0,0,0/c1	Fin-specific	probably-unrelated
PCMT1L	-	-	-	-	2.99	4.87	4.41	3.61	3.31	3.18	0,0,0/c1	Fin-specific	no-mutants
FAM227B	0	0	0	0	0.96	1.51	1.18	0.94	1.29	0.6	0,0,0/c1	Fin-specific	no-mutants
STAB2	0.04	0.12	0.02	0.07	1.77	1.75	1.85	2.63	1.4	1.05	0,0,0/c1	Fin-specific	probably-unrelated
UGT2A3	0	0	0	0	1.37	1.52	2.09	1.42	1.12	1.34	0,0,0/c1	Fin-specific	no-mutants
LOC102360827	-	-	-	-	5.94	3.14	2.94	4.37	5.31	7.22	0,0,0/c1	Fin-specific	no-mutants
ZNF835	-	-	-	-	2.58	2.55	3.33	2.65	1.69	1.66	0,0,0/c1	Fin-specific	no-mutants
SERPINC1	0.21	0.39	0.11	0.8	0.9	1.21	0.95	0.42	1.17	0.6	0,0,0/c1	Fin-specific	probably-unrelated
CPAMD8	-	-	-	-	36.79	20.8	25.84	32.27	34.47	51.36	0,0,0/c1	Fin-specific	no-mutants
LOC103187045	-	-	-	-	1.21	2.16	2	1.42	1.13	1.65	0,0,0/c1	Fin-specific	no-mutants
FAM71B	0	0.04	0	0	1.38	2.56	1.7	1.72	1.94	1.38	0,0,0/c1	Fin-specific	no-mutants
DRAM1	0.04	0.13	0.16	0.63	0.86	0.58	1.32	0.78	0.72	0.34	0,0,0/c1	Fin-specific	no-mutants
UBE2D4	-	-	-	-	0.99	0.86	1.67	0.72	0.88	0.84	0,0,0/c1	Fin-specific	no-mutants
DMBT1L3	-	-	-	-	1.33	0.37	0.35	1.46	1.25	1.86	0,0,0/c1	Fin-specific	no-mutants
CCDC114	0.28	0.6	0.87	0.7	2.04	1.79	2.92	1.46	1.69	1.54	0,0,0/c1	Fin-specific	no-mutants
PDCD1LG2	0	0	0	0	0.79	1.17	1.13	0.85	0.59	0.72	0,0,0/c1	Fin-specific	probably-unrelated
LOC103181830	-	-	-	-	2.79	5.76	5.71	5	3.3	2.82	0,0,0/c1	Fin-specific	no-mutants
ZNF721	-	-	-	-	1.1	1.96	1.49	1.21	0.71	1.68	0,0,0/c1	Fin-specific	no-mutants
MCTP1	0.14	0.04	0.13	0.3	1.39	2.01	1.48	1.9	0.63	1.54	0,0,0/c1	Fin-specific	no-mutants
CARD11	0	0.03	0.6	0.48	1.13	1.66	1.31	0.9	1.24	1.06	0,0,0/c1	Fin-specific	probably-unrelated
LOC106704520	-	-	-	-	2.88	4.45	3.08	2.01	2.53	3.26	0,0,0/c1	Fin-specific	no-mutants
LOC103176070	-	-	-	-	3.52	5.88	5.81	4.67	3.76	3.4	0,0,0/c1	Fin-specific	no-mutants
PPEF1	0.05	0.07	0.14	0.27	1.42	2.06	1.69	1.6	1.6	0.72	0,0,0/c1	Fin-specific	probably-unrelated
CCDC81	0.07	0.04	0.03	0.11	2.64	3.58	3.13	3.46	1.44	1.81	0,0,0/c1	Fin-specific	no-mutants
MYADML2	0	0.08	0.15	0.36	6.75	4.27	5.59	5.79	3.8	8.54	0,0,0/c1	Fin-specific	no-mutants
KCTD19	0.01	0	0	0.03	4.06	5.38	4.68	3.03	3.84	2.71	0,0,0/c1	Fin-specific	no-mutants
FGF1	0.12	0.1	0.34	0.69	2.31	3.12	2.78	2.37	1.65	1.41	0,0,0/c1	Fin-specific	probably-unrelated
DCDC1	-	-	-	-	1.68	2.63	1.61	1.91	1.38	1.72	0,0,0/c1	Fin-specific	no-mutants
ESR2	0.07	0.08	0.21	0.23	2.28	2.61	3.59	2.83	1.64	1.26	0,0,0/c1	Fin-specific	probably-unrelated
CHRNA2	0	0	0	0	1.21	0.98	1.67	1.15	1.09	0.32	0,0,0/c1	Fin-specific	probably-unrelated
ARRDC5	0.03	0.08	0	0	2.17	1.14	1.06	2.16	1.27	2.74	0,0,0/c1	Fin-specific	no-mutants
NAXE	-	-	-	-	8.39	4.03	5.45	8.18	7.11	11.31	0,0,0/c1	Fin-specific	no-mutants
SYCP3	0.14	0.04	0.38	0.05	2.89	4.13	2.78	3.18	2.39	2.49	0,0,0/c1	Fin-specific	probably-unrelated
NACAD	0.03	0.07	0.27	0.76	3.58	3.41	5.02	3.99	3.03	1.72	0,0,0/c1	Fin-specific	probably-unrelated
LOC106737636	-	-	-	-	4.78	6.71	4.09	4.84	5.65	3.28	0,0,0/c1	Fin-specific	no-mutants
LOC106702414	-	-	-	-	0.89	1.53	1.36	1.51	0.66	0.6	0,0,0/c1	Fin-specific	no-mutants
LMNTD1	0	0	0.06	0.06	1.35	2.02	1.67	1.36	1.43	0.83	0,0,0/c1	Fin-specific	no-mutants
LOC102346213	-	-	-	-	1.04	0.32	0.58	1.49	0.67	1.37	0,0,0/c1	Fin-specific	no-mutants
ACAT3	0.13	0.29	0.12	0.14	1.09	1.79	1.76	1.57	0.95	0.48	0,0,0/c1	Fin-specific	no-mutants
FAM177B	-	-	-	-	3.75	7.14	7.24	5.28	4.05	2.86	0,0,0/c1	Fin-specific	no-mutants
ZNF3	-	-	-	-	1.67	2.8	2.39	2.06	0.17	1.65	0,0,0/c1	Fin-specific	no-mutants
SIM1	0.37	0.36	0.34	0.26	2.59	5.41	5.47	3.57	2.32	3.17	0,0,0/c1	Fin-specific	probably-unrelated
ADAP2	0.04	0.03	0.06	0.19	0.52	1.14	1.21	0.86	0.59	0.53	0,0,0/c1	Fin-specific	no-mutants
ACSM3	0.04	0.05	0.02	0	1.67	3.47	4.43	2.18	2.31	1.96	0,0,0/c1	Fin-specific	probably-unrelated
LOC102363557	-	-	-	-	6.92	4.61	4.47	4.66	6.62	10.13	0,0,0/c1	Fin-specific	no-mutants
NOXO1	0.17	0.35	0.38	0.81	6.65	4.25	10.11	4.11	5.01	5.5	0,0,0/c1	Fin-specific	probably-unrelated
LOC102361636	-	-	-	-	1.29	1.63	2.59	1.7	1.21	0.97	0,0,0/c1	Fin-specific	no-mutants
KISS1R	0.05	0.02	0.18	0.3	1.86	1.96	3.13	1.62	1.44	0.55	0,0,0/c1	Fin-specific	probably-unrelated
LOC102351234	-	-	-	-	2.18	3.23	1.75	1.94	2.13	1.54	0,0,0/c1	Fin-specific	no-mutants
LOC102361952	-	-	-	-	1.69	1.15	1.31	1.39	0.42	2.22	0,0,0/c1	Fin-specific	no-mutants
ZSCAN5B	0.02	0.02	0	0	7.28	3.61	3.85	5.35	3.42	8.38	0,0,0/c1	Fin-specific	no-mutants
LEXM	0.03	0.06	0.02	0.27	1.31	1.93	1.61	1.24	1.14	0.48	0,0,0/c1	Fin-specific	embryonic lethality
LOC102574048	-	-	-	-	0.86	1.33	0.74	0.91	0.84	0.48	0,0,0/c1	Fin-specific	no-mutants
LOC103177685	-	-	-	-	12.35	17.58	14.12	10.89	12.63	5.86	0,0,0/c1	Fin-specific	no-mutants
SCUBE2	0.01	0	0.17	0.69	2.42	1.4	1.36	1.57	1.47	2.97	0,0,0/c1	Fin-specific	probably-unrelated
CADM3	0.49	0.75	0.53	0.91	2.46	3.06	4.06	1.52	1.35	2.33	0,0,0/c1	Fin-specific	probably-unrelated
MYO7B	0.02	0.01	0.02	0	0.84	1.23	1.37	1.02	0.63	0.46	0,0,0/c1	Fin-specific	probably-unrelated
LOC103185943	-	-	-	-	2.45	3.5	2.45	2.15	2.44	1.46	0,0,0/c1	Fin-specific	no-mutants
OLFM5	0	0.02	0	0	1.86	2.84	2.62	1.54	1.19	1.01	0,0,0/c1	Fin-specific	no-mutants
PTPN5	0.03	0.11	0.15	0.24	0.78	1.16	1.12	0.83	0.39	0.23	0,0,0/c1	Fin-specific	probably-unrelated
ADTRP	0.22	0.33	0.03	0.19	1.2	0.72	0.68	0.81	0.68	1.54	0,0,0/c1	Fin-specific	no-mutants
LOC102351176	-	-	-	-	9.44	4.2	5.59	5.37	5.81	12.87	0,0,0/c1	Fin-specific	no-mutants
TRARG1	-	-	-	-	1.99	2.37	3.62	1.72	1.23	1.09	0,0,0/c1	Fin-specific	probably-unrelated
HENMT1	0.18	0.36	0.42	0.89	1.46	3.13	1.24	1.89	2.38	1.16	0,0,0/c1	Fin-specific	probably-unrelated
FSD2	0.01	0.06	0.05	0.24	3.23	2.03	2.45	2.77	2.06	4.65	0,0,0/c1	Fin-specific	no-mutants
PRRT1	0	0	0	0.11	0.9	2.14	2.43	1.35	0.64	0.77	0,0,0/c1	Fin-specific	probably-unrelated
CYP2AC7	-	-	-	-	1.03	1.14	1.8	0.57	0.67	0.59	0,0,0/c1	Fin-specific	no-mutants
KCNJ11	0.17	0.16	0.33	0.86	4.64	2.99	3.75	3.67	2.44	6.45	0,0,0/c1	Fin-specific	probably-unrelated
TTC25	0.37	0.5	0.45	0.34	0.97	1	0.54	0.74	0.79	1.44	0,0,0/c1	Fin-specific	probably-unrelated
LOC102353925	-	-	-	-	1.1	0.79	0.49	0.59	0.66	1.28	0,0,0/c1	Fin-specific	no-mutants
LOC103175532	-	-	-	-	1.61	1.96	0.86	1.43	1.5	0.51	0,0,0/c1	Fin-specific	no-mutants
LOC102570188	-	-	-	-	18.32	7.48	9.37	14.59	11.74	23.01	0,0,0/c1	Fin-specific	no-mutants
LOC102365798	-	-	-	-	1.7	0.16	0.24	1.61	0.76	1.53	0,0,0/c1	Fin-specific	no-mutants
LOC102356667	-	-	-	-	2.47	3.31	1.91	1.87	2.12	1.87	0,0,0/c1	Fin-specific	no-mutants
TTLL2	0	0	0	0	1.57	1.76	1.3	1.02	1.22	0.56	0,0,0/c1	Fin-specific	no-mutants
FAM162B	0.45	0.17	0.33	0.69	1.04	1.12	0.71	0.89	0.89	0.24	0,0,0/c1	Fin-specific	no-mutants
GSDME	-	-	-	-	12.84	15.33	10.08	9.38	10.93	6.28	0,0,0/c1	Fin-specific	probably-unrelated
OFCC1	0.43	0.23	0.09	0	0.93	1.02	0.53	0.55	0.85	0.41	0,0,0/c1	Fin-specific	probably-unrelated
LOC102355001	-	-	-	-	1.06	1.24	0.62	0.69	1.39	0.08	0,0,0/c1	Fin-specific	no-mutants
PPP1R42	0.02	0	0.09	0	2.17	2.71	1.51	1.71	2.52	0.58	0,0,0/c1	Fin-specific	probably-unrelated
MEGF11	0.04	0.18	0.39	0.31	1.53	1.83	0.92	1.63	1.19	0.57	0,0,0/c1	Fin-specific	probably-unrelated
LOC102363540	-	-	-	-	6.48	7.5	7.63	4.48	3.8	3.19	0,0,0/c1	Fin-specific	no-mutants
LOC103190299	-	-	-	-	5.48	6.31	4.32	3.98	4.84	2.07	0,0,0/c1	Fin-specific	no-mutants
SATL1	0	0	0	0	2.29	2.05	0.58	0.61	2.5	1.87	0,0,0/c1	Fin-specific	no-mutants
CCDC183	0	0	0	0	2.42	2.75	2.14	1.66	2.13	1.04	0,0,0/c1	Fin-specific	no-mutants
LOC103191257	-	-	-	-	2.71	3.39	1.98	1.62	2.71	1.95	0,0,0/c1	Fin-specific	no-mutants
FN3K	0	0.04	0.83	0.62	4.38	1.86	5.19	2.69	3.2	2.29	0,0,0/c1	Fin-specific	probably-unrelated
LOC102363381	-	-	-	-	26.91	28.51	26.93	19.82	19.53	9.55	0,0,0/c1	Fin-specific	no-mutants
LOC103189645	-	-	-	-	39.77	29.11	16.48	37.58	36.16	13.62	0,0,0/c1	Fin-specific	no-mutants
GCNA	-	-	-	-	3.87	4.09	3.65	2.85	2.89	0.92	0,0,0/c1	Fin-specific	no-mutants
CABCOCO1	-	-	-	-	3.71	4.59	3.41	3.24	3.8	1.76	0,0,0/c1	Fin-specific	no-mutants
LOC102362993	-	-	-	-	2.05	1.75	2.44	2.99	1.44	1.19	0,0,0/c1	Fin-specific	no-mutants
SETD9	-	-	-	-	2.58	3.37	2.07	2.18	2.57	1.94	0,0,0/c1	Fin-specific	no-mutants
TMEM154	0.15	0.1	0.26	0.73	1.37	1.32	1.26	1.86	0.64	0.45	0,0,0/c1	Fin-specific	no-mutants
LOC407092	-	-	-	-	3.51	1.79	4.04	1.5	2.79	1.24	0,0,0/c1	Fin-specific	no-mutants
LOC102356543	-	-	-	-	0.59	0.61	0.62	1.06	0.63	1.4	0,0,0/c1	Fin-specific	no-mutants
LOC102560429	-	-	-	-	1.01	1.77	1.83	1.66	1.33	2.88	0,0,0/c1	Fin-specific	no-mutants
RASGRF1	0	0.04	0.13	0.13	0.53	0.48	0.84	0.48	0.76	1.22	0,0,0/c1	Fin-specific	probably-unrelated
PILRB	-	-	-	-	0.38	0.86	0.44	0.76	0.46	1.27	0,0,0/c1	Fin-specific	no-mutants
LOC102347935	-	-	-	-	0.91	0.74	0.74	1.36	1.1	2	0,0,0/c1	Fin-specific	no-mutants
LOC102365381	-	-	-	-	0.16	0.27	0.06	1	0.05	0.37	0,0,0/c1	Fin-specific	no-mutants
ATCAY	0.01	0.07	0.25	0.35	0.98	1.1	1.27	1.29	0.64	2.07	0,0,0/c1	Fin-specific	probably-unrelated
LOC102355509	-	-	-	-	1.07	1.16	0.6	1.08	0.94	2.13	0,0,0/c1	Fin-specific	no-mutants
EFHD1	0.37	0.34	0.52	0.85	0.88	1.55	1.01	1.4	0.93	2.37	0,0,0/c1	Fin-specific	no-mutants
LOC102346418	-	-	-	-	3.19	2.34	2.79	3.86	3.8	6.47	0,0,0/c1	Fin-specific	no-mutants
LOC102351129	-	-	-	-	27.8	31.64	28.03	47.37	28.91	67.3	0,0,0/c1	Fin-specific	no-mutants
LOC102360025	-	-	-	-	7.75	16.67	24.7	15.46	9.02	29.82	0,0,0/c1	Fin-specific	no-mutants
CLCN1	0.07	0.08	0.03	0.05	1.83	3.27	6.22	3.29	1.56	6.81	0,0,0/c1	Fin-specific	forelimb paralysis,hindlimb paralysis
LOC107049132	-	-	-	-	2.01	0.97	3.91	1.79	1.39	3.45	0,0,0/c1	Fin-specific	no-mutants
CLEC19A	-	-	-	-	1.39	2.05	1.46	1.53	1.76	3.45	0,0,0/c1	Fin-specific	no-mutants
LOC102351700	-	-	-	-	1.26	1.35	1.32	1.61	1.6	2.95	0,0,0/c1	Fin-specific	no-mutants
LOC106706718	-	-	-	-	0.99	1.32	0.99	1.24	1.14	2.33	0,0,0/c1	Fin-specific	no-mutants
CFAP77	0.11	0.17	0.57	0.76	0.56	0.74	1.51	0.66	0.62	1.09	0,0,0/c1	Fin-specific	no-mutants
LOC102359834	-	-	-	-	0.15	0.36	1.02	0.38	0.45	0.57	0,0,0/c1	Fin-specific	no-mutants
AQP12	0	0.03	0	0.05	0.34	0.57	0.56	1.16	0.59	0.39	0,0,0/c1	Fin-specific	probably-unrelated
LOC103181763	-	-	-	-	0.04	0.45	0.82	1.08	0.37	0.24	0,0,0/c1	Fin-specific	no-mutants
CACNA1B	0.87	0.65	0.52	0.87	0.66	0.82	0.57	0.94	0.59	1.4	0,0,0/c1	Fin-specific	probably-unrelated
LOC102352573	-	-	-	-	1.38	3.84	1.78	1.54	1.79	4.21	0,0,0/c1	Fin-specific	no-mutants
LOC102348175	-	-	-	-	0.39	0.51	1.83	0.11	0.79	1.01	0,0,0/c1	Fin-specific	no-mutants
FAM149B1	-	-	-	-	1.24	0.67	2.76	0	1.31	2.23	0,0,0/c1	Fin-specific	no-mutants
PTAFR	0.25	0.27	0.5	0.7	0.44	1.24	0.64	2.05	0.86	1.54	0,0,0/c1	Fin-specific	probably-unrelated
CNTN3	0.06	0.1	0.13	0.97	0.34	0.62	0.91	0.6	0.64	1.2	0,0,0/c1	Fin-specific	no-mutants
LOC103187893	-	-	-	-	0.98	1.86	1.69	2.06	1.43	3.09	0,0,0/c1	Fin-specific	no-mutants
ASIC3	0.02	0.07	0.23	0.26	0.36	0.76	0.37	1.34	0.45	0.81	0,0,0/c1	Fin-specific	probably-unrelated
GRM2	0.01	0.02	0.01	0.01	0.52	0.5	0.62	1.59	0.27	0.67	0,0,0/c1	Fin-specific	probably-unrelated
LOC102364152	-	-	-	-	0.38	0.75	1.34	0.39	0.48	1.12	0,0,0/c1	Fin-specific	no-mutants
LOC102361680	-	-	-	-	0.73	556.88	1.64	1289.01	2.44	7.56	0,0,0/c1	Fin-specific	no-mutants
LOC109284402	-	-	-	-	1.56	2	1.34	1.85	1.97	3.27	0,0,0/c1	Fin-specific	no-mutants
HSPA1L	0.03	0.04	0.08	0.27	1.75	19.34	0.97	47.33	0.99	1.47	0,0,0/c1	Fin-specific	no-mutants
AVPR1B	0	0	0.01	0.01	0.5	0.38	0.56	0.78	0.56	1.22	0,0,0/c1	Fin-specific	probably-unrelated
LOC102352270	-	-	-	-	0.89	0.71	1.53	1.04	1.08	2.41	0,0,0/c1	Fin-specific	no-mutants
LOC102365358	-	-	-	-	4.09	3.87	5.45	5.46	5.19	9.66	0,0,0/c1	Fin-specific	no-mutants
PRSS39	0	0	0	0	0.41	0.53	0.96	0.32	0.56	1.23	0,0,0/c1	Fin-specific	no-mutants
NEURL1B	0.06	0.04	0.21	0.55	0.91	1.11	1.17	1.05	1.07	2.21	0,0,0/c1	Fin-specific	no-mutants
LOC102358166	-	-	-	-	0.64	0.29	0.69	0.94	0.16	1.22	0,0,0/c1	Fin-specific	no-mutants
DLEC1	0.07	0.05	0.14	0.28	1.77	1.72	1.29	1.6	1.73	3.87	0,0,0/c1	Fin-specific	probably-unrelated
FAR2	0	0.02	0.18	0.52	0.69	0.76	1	0.94	0.72	1.74	0,0,0/c1	Fin-specific	probably-unrelated
TNFSF13	0	0	0	0	0.84	0.45	0.87	0.98	0.58	1.73	0,0,0/c1	Fin-specific	probably-unrelated
AICDA	0.03	0.06	0.09	0.22	1.9	0.9	1.01	1.73	1.57	3.76	0,0,0/c1	Fin-specific	probably-unrelated
RPP25	0.51	0.71	0.29	0.61	2.18	1.89	2.15	1.88	2.22	4.92	0,0,0/c1	Fin-specific	no-mutants
LOC102351979	-	-	-	-	2.93	2.61	6.84	4.2	3.22	9.24	0,0,0/c1	Fin-specific	no-mutants
TNFAIP8L3	0.27	0.09	0.06	0.62	0.52	1.37	1.38	1.13	1.02	2.46	0,0,0/c1	Fin-specific	no-mutants
RNF207	0	0.01	0	0	1.06	0.72	1.02	1.97	0.87	2.78	0,0,0/c1	Fin-specific	no-mutants
ANGPT4	0.46	0.06	0.05	0.25	1.47	1.21	2.38	2.67	1.62	4.01	0,0,0/c1	Fin-specific	no-mutants
LOC102559949	-	-	-	-	6.55	8.36	10.83	10.15	8.31	19.49	0,0,0/c1	Fin-specific	no-mutants
FGF16	0	0	0.02	0.43	4.27	4.63	4.56	5.88	7.45	11.68	0,0,0/c1	Fin-specific	embryonic lethality during organogenesis, complete penetrance
SLIT1	0.17	0.54	0.25	0.15	7.43	7.24	19.32	12.24	9.1	26.73	0,0,0/c1	Fin-specific	probably-unrelated
LOC102348449	-	-	-	-	1.54	2.7	2.99	3.31	2.85	5.35	0,0,0/c1	Fin-specific	no-mutants
LOC107078375	-	-	-	-	0.73	0.63	1.08	1.05	1.27	2.05	0,0,0/c1	Fin-specific	no-mutants
LOC102354153	-	-	-	-	4.56	4.52	5.66	7.28	8.07	13.04	0,0,0/c1	Fin-specific	no-mutants
STK17A	-	-	-	-	4.62	8.71	8.58	10.29	12.67	16.97	0,0,0/c1	Fin-specific	no-mutants
CD209E	0	0	0	0	40.63	50.7	71.27	84.88	103.65	134.17	0,0,0/c1	Fin-specific	no-mutants
SCN10A	0	0	0	0.01	0.44	0.48	0.55	0.69	0.9	1.21	0,0,0/c1	Fin-specific	probably-unrelated
LOC103173015	-	-	-	-	29.56	34.16	50.09	55.61	67.89	89.73	0,0,0/c1	Fin-specific	no-mutants
NCAN	0.04	0.17	0.65	0.72	0.62	0.73	0.9	0.75	1.23	1.73	0,0,0/c1	Fin-specific	probably-unrelated
PARP3	0.24	0.46	0.86	0.87	9.99	10.92	15.38	15.93	20.94	29.28	0,0,0/c1	Fin-specific	no-mutants
MELTF	0.01	0.02	0.09	0.32	0.84	0.69	1.12	1.27	1.49	2.27	0,0,0/c1	Fin-specific	no-mutants
AADACL3	0	0	0	0	0.89	0.71	1.12	1.31	1.6	2.34	0,0,0/c1	Fin-specific	no-mutants
LOC103183101	-	-	-	-	0.42	0.47	0.9	0.69	0.89	1.41	0,0,0/c1	Fin-specific	no-mutants
DHX58	0.18	0.16	0.18	0.5	0.44	0.49	1.38	1.12	1.15	1.86	0,0,0/c1	Fin-specific	probably-unrelated
DOCK2	0.17	0.1	0.48	0.91	0.57	0.65	0.71	0.74	1.36	1.73	0,0,0/c1	Fin-specific	probably-unrelated
FAM198A	0.13	0.25	0.38	0.81	0.44	0.54	0.54	0.48	1.02	1.25	0,0,0/c1	Fin-specific	no-mutants
STYK1	0.06	0.29	0.76	0.76	11.35	12.36	19.2	20.01	26.54	34.99	0,0,0/c1	Fin-specific	no-mutants
SOX15	0.05	0.14	0.23	0.35	0	6.3	1.47	7.41	4.17	8.63	0,0,0/c1	Fin-specific	probably-unrelated
NOX1	0	0	0	0	0.73	2.69	3.19	8.13	4.82	5.95	0,0,0/c1	Fin-specific	probably-unrelated
DYNLRB2	0	0.08	0.1	0	5.79	11.74	10.98	14.2	12.02	21.35	0,0,0/c1	Fin-specific	probably-unrelated
NRG1	0.08	0.11	0.42	0.53	0.71	0.97	1.46	1.41	1.44	2.22	0,0,0/c1	Fin-specific	embryonic lethality during organogenesis, complete penetrance
DISP3	0.03	0.1	0.13	0.14	0.08	0.4	0.62	1.35	0.98	1.01	0,0,0/c1	Fin-specific	no-mutants
RNF225	0.32	0.23	0.3	0.29	5.32	5.94	9.41	9.93	9.84	15.23	0,0,0/c1	Fin-specific	no-mutants
CD163	0.01	0.03	0	0.03	1.29	1.22	3.83	6.72	4.27	5.81	0,0,0/c1	Fin-specific	probably-unrelated
LOC103179462	-	-	-	-	0.13	1.07	7.08	8.81	3.17	4.46	0,0,0/c1	Fin-specific	no-mutants
LOC102354306	-	-	-	-	3.77	3.4	4.56	4.85	5.5	8.24	0,0,0/c1	Fin-specific	no-mutants
LOC103190313	-	-	-	-	0.27	0.15	0.34	1.49	0.59	0.3	0,0,0/c1	Fin-specific	no-mutants
LOC102358245	-	-	-	-	2.36	1.67	3.44	3.7	3.52	5.59	0,0,0/c1	Fin-specific	no-mutants
LOC102367521	-	-	-	-	0.22	0.51	0.19	1.26	0.71	0.93	0,0,0/c1	Fin-specific	no-mutants
LOC102349917	-	-	-	-	0.66	0.57	0.84	2	0.83	1.94	0,0,0/c1	Fin-specific	no-mutants
LOC106706315	-	-	-	-	0.88	0.76	1.31	0.76	1.28	2.02	0,0,0/c1	Fin-specific	no-mutants
LOC102359506	-	-	-	-	0.45	0.93	0.64	4.17	0.72	2.48	0,0,0/c1	Fin-specific	no-mutants
BTBD8	0.38	0.35	0.38	0.75	2.2	2.34	2.69	2.67	3.44	5.19	0,0,0/c1	Fin-specific	no-mutants
LINGO2	0	0.01	0.17	0.34	0.52	0.57	1.22	1.04	0.86	1.71	0,0,0/c1	Fin-specific	no-mutants
A830010M20RIK	0.36	0.25	0.43	0.84	2.84	3.02	3.76	4.01	4.81	7.57	0,0,0/c1	Fin-specific	no-mutants
LOC102346581	-	-	-	-	2.53	3.07	3.47	3.15	4.29	6.73	0,0,0/c1	Fin-specific	no-mutants
LGALS4	0.07	0.07	0.06	0.07	14.27	14.3	20.15	22.72	22.32	39.52	0,0,0/c1	Fin-specific	no-mutants
DPEP2	0	0.13	0.03	0	0.16	0.46	0.44	1.24	0.77	0.82	0,0,0/c1	Fin-specific	no-mutants
SPATA20	0.02	0.01	0	0.11	3.16	3.5	4.92	4.38	6.45	8.43	0,0,0/c1	Fin-specific	probably-unrelated
ESRRG	0.22	0.5	0.51	0.9	0.95	1.01	1.37	1.55	1.63	2.65	0,0,0/c1	Fin-specific	probably-unrelated
LOC102357659	-	-	-	-	0.31	0.52	0.75	0.43	0.76	1.11	0,0,0/c1	Fin-specific	no-mutants
KIAA1522	-	-	-	-	1.1	1.36	2.04	1.68	2.15	3.29	0,0,0/c1	Fin-specific	no-mutants
LOC107075464	-	-	-	-	0.67	2.05	0.84	2.3	0.69	1.64	0,0,0/c1	Fin-specific	no-mutants
LOC102562844	-	-	-	-	75.2	193.65	88.61	242.1	80.74	68.59	0,0,0/c1	Fin-specific	no-mutants
RTBDN	0	0	0	0	0.24	1.17	1.07	0.4	0.5	1.05	0,0,0/c1	Fin-specific	probably-unrelated
LOC102353550	-	-	-	-	0.33	1.2	2.37	1.49	1.15	0.68	0,0,0/c1	Fin-specific	no-mutants
CAVIN4	-	-	-	-	5.9	3.7	5.08	6.73	4.66	9.52	0,0,0/c1	Fin-specific	probably-unrelated
OSBP2	0.15	0.18	0.34	0.47	2.24	3.58	1.76	4.58	1.28	2.63	0,0,0/c1	Fin-specific	probably-unrelated
LOC103186291	-	-	-	-	0.25	1.37	0.65	1.38	1.04	0	0,0,0/c1	Fin-specific	no-mutants
F2RL1	0.21	0.26	0.2	0.92	2.13	6.98	3.93	3.56	6.38	2.96	0,0,0/c1	Fin-specific	oligodactyly,embryonic lethality, complete penetrance
LOC102360556	-	-	-	-	0.66	1.21	1.23	1.99	0.65	0.67	0,0,0/c1	Fin-specific	no-mutants
LOC103185242	-	-	-	-	0.74	0.79	0.27	1.28	1.04	0.19	0,0,0/c1	Fin-specific	no-mutants
LOC103189490	-	-	-	-	1.66	3.27	2.86	1.81	2.44	1.94	0,0,0/c1	Fin-specific	no-mutants
LOC102346563	-	-	-	-	1.25	2.29	2.52	3.02	1.91	0.86	0,0,0/c1	Fin-specific	no-mutants
SLC13A2	0	0	0.02	0.02	9.34	7.98	16.74	14.04	11.99	6.69	0,0,0/c1	Fin-specific	probably-unrelated
LOC106703376	-	-	-	-	0.75	1	1.48	0.67	1.06	0.66	0,0,0/c1	Fin-specific	no-mutants
LOC103181273	-	-	-	-	0.5	1.37	1.1	1.03	0.94	1.04	0,0,0/c1	Fin-specific	no-mutants
LOC102346031	-	-	-	-	2.12	3.75	2.67	2.33	2.84	1.93	0,0,0/c1	Fin-specific	no-mutants
LOC102354759	-	-	-	-	1.62	1.57	1.43	1.96	0.92	2.45	0,0,0/c1	Fin-specific	no-mutants
HIST1H2BO	-	-	-	-	0.48	0.94	0.81	1.11	0.46	0.69	0,0,0/c1	Fin-specific	no-mutants
RSPH14	0	0	0	0	0.89	1	1.68	0.83	0.84	1.02	0,0,0/c1	Fin-specific	no-mutants
BCAS1	0.28	0.06	0.18	0.3	1.5	2.91	2.33	1.51	1.64	1.94	0,0,0/c1	Fin-specific	no-mutants
PLEKHS1	0.04	0.05	0	0.06	0.49	0.64	1.21	0.71	0.83	0.34	0,0,0/c1	Fin-specific	no-mutants
LOC103180455	-	-	-	-	0.51	1.29	1.2	0.82	0.94	0.7	0,0,0/c1	Fin-specific	no-mutants
RAB19	0.15	0.31	0.32	0.5	1.44	3.58	3.03	2.04	2.44	2.3	0,0,0/c1	Fin-specific	probably-unrelated
LOC103182004	-	-	-	-	0.52	0.9	0.91	1.32	0.71	0.12	0,0,0/c1	Fin-specific	no-mutants
LOC102358817	-	-	-	-	5.55	17.99	18.63	8.91	12.2	4.86	0,0,0/c1	Fin-specific	no-mutants
TFR2	0.41	0.32	0.42	0.14	1.18	2.9	1.74	1.23	1.98	2.19	0,0,0/c1	Fin-specific	probably-unrelated
GM1527	0	0	0	0	0.38	1.03	0.78	0.61	0.88	0.33	0,0,0/c1	Fin-specific	no-mutants
LOC107078451	-	-	-	-	0.98	1.99	2.22	1.65	1.92	0.75	0,0,0/c1	Fin-specific	no-mutants
LOC102570289	-	-	-	-	0.66	0.85	1.16	0.56	1.01	0.5	0,0,0/c1	Fin-specific	no-mutants
S1PR5	0.04	0.07	0.36	0.48	0.53	0.74	1.08	0.84	0.54	0.74	0,0,0/c1	Fin-specific	probably-unrelated
BTC	0.01	0.04	0.12	0.75	4.28	8.51	5.23	5.87	7.79	5.16	0,0,0/c1	Fin-specific	probably-unrelated
GAD1	0.11	0	0.04	0	1.24	1.01	0.64	1.84	1.67	0.84	0,0,0/c1	Fin-specific	preaxial polydactyly
EREG	0	0.02	0.01	0.01	1.9	3.86	3.5	2.91	3.17	2.49	0,0,0/c1	Fin-specific	probably-unrelated
LOC106703996	-	-	-	-	0.67	1.36	1.09	0.88	1.2	1	0,0,0/c1	Fin-specific	no-mutants
GPR75	0.04	0.04	0.17	0.13	2.23	1.91	3.77	3.09	2.63	1.61	0,0,0/c1	Fin-specific	no-mutants
LOC102569370	-	-	-	-	0.88	1.36	0.87	1.14	1.11	0.83	0,0,0/c1	Fin-specific	no-mutants
CUNH3ORF33	-	-	-	-	1	1.75	1.57	1.03	1.47	1.31	0,0,0/c1	Fin-specific	no-mutants
HPD	0	0	0	0	1.05	1.22	1.91	1.23	1.38	1.17	0,0,0/c1	Fin-specific	probably-unrelated
LOC106702084	-	-	-	-	0.6	1.13	1.03	0.53	1.38	0.68	0,0,0/c1	Fin-specific	no-mutants
LOC102349817	-	-	-	-	0.97	0.83	1.15	0.79	1.11	1.56	0,0,0/c1	Fin-specific	no-mutants
MED12L	0.26	0.18	0.48	0.89	1.5	1.21	1.43	1.45	1.5	2.23	0,0,0/c1	Fin-specific	no-mutants
SHC3	0.23	0.08	0.31	0.6	0.9	0.73	0.9	0.87	0.79	1.37	0,0,0/c1	Fin-specific	no-mutants
AQP9	0.01	0.04	0.08	0.11	1.43	1.67	2.97	2.31	2.17	1.31	0,0,0/c1	Fin-specific	probably-unrelated
CAPN11	0.1	0.46	0.08	0.2	177.37	141.82	202.88	206.59	171.65	290.42	0,0,0/c1	Fin-specific	probably-unrelated
L3MBTL1	0.01	0	0.02	0.03	0.51	1.03	0.58	1.27	0.84	0.6	0,0,0/c1	Fin-specific	no-mutants
LOC102575274	-	-	-	-	1.06	1.59	0.6	1.83	1.95	0.75	0,0,0/c1	Fin-specific	no-mutants
LOC103181744	-	-	-	-	0.75	0.48	0.07	1.02	1.07	0.61	0,0,0/c1	Fin-specific	no-mutants
CNTNAP5A	0	0	0	0	0.32	0.58	1.21	0.85	0.79	0.47	0,0,0/c1	Fin-specific	no-mutants
KLHDC8A	0.21	0.04	0.03	0.04	1.28	1.51	3.04	2.26	1.45	2.01	0,0,0/c1	Fin-specific	no-mutants
GPR37L1	0	0	0	0	1.5	1.29	3.53	2.49	1.91	1.04	0,0,0/c1	Fin-specific	probably-unrelated
SULT1C1	0	0	0	0	352.56	297.37	371.91	342.41	356.71	567.9	0,0,0/c1	Fin-specific	probably-unrelated
FAM181A	0.12	0.03	0.03	0.03	0.85	1	1.07	1.71	0.88	0.95	0,0,0/c1	Fin-specific	no-mutants
AGMO	0.26	0.1	0.27	0.31	0.62	0.81	0.95	1.33	0.62	0.6	0,0,0/c1	Fin-specific	no-mutants
LOC102350663	-	-	-	-	9.75	8.93	11.27	11.15	10.9	17.01	0,0,0/c1	Fin-specific	no-mutants
JPT1	-	-	-	-	101.98	94.83	107.08	128.02	111.36	174.4	0,0,0/c1	Fin-specific	no-mutants
LOC102558012	-	-	-	-	0.58	0.55	0.66	0.73	0.58	1.02	0,0,0/c1	Fin-specific	no-mutants
TTC24	0	0	0	0	0.76	0.64	0.63	0.57	0.85	1.13	0,0,0/c1	Fin-specific	no-mutants
GTSF1	0	0	0	0	1.3	1.73	1.47	3.06	2.27	1.24	0,0,0/c1	Fin-specific	probably-unrelated
LOC102362440	-	-	-	-	5.5	5.43	6.34	6.24	6.45	10.28	0,0,0/c1	Fin-specific	no-mutants
SPATC1L	0	0.03	0	0	1.69	0.87	0	0.77	1.72	1.16	0,0,0/c1	Fin-specific	no-mutants
NCAM2	0	0.04	0.15	0.7	0.53	0.52	1.38	1.09	0.61	0.63	0,0,0/c1	Fin-specific	probably-unrelated
LOC102352268	-	-	-	-	7.01	5.43	6.56	9.21	7.37	12.3	0,0,0/c1	Fin-specific	no-mutants
EPHA10	0.02	0.02	0.02	0.02	1.07	1.09	1.39	1.36	1.18	2.11	0,0,0/c1	Fin-specific	probably-unrelated
WWC3	-	-	-	-	13.49	13.21	13.45	16.37	16.22	22.67	0,0,0/c1	Fin-specific	no-mutants
DNAAF1	0	0	0.02	0	1.41	1.41	1.81	2.13	1.75	2.72	0,0,0/c1	Fin-specific	probably-unrelated
PLA2G3	0.35	0.44	0.21	0.11	1.5	2.01	5.15	4.41	4.33	1.27	0,0,0/c1	Fin-specific	embryonic lethality before implantation, complete penetrance
LOC106701826	-	-	-	-	0.32	0.99	0.49	0.57	1.08	0.65	0,0,0/c1	Fin-specific	no-mutants
NECAB1	0.07	0.14	0.17	0.84	0.5	0.9	0.65	0.6	0.58	1.08	0,0,0/c1	Fin-specific	no-mutants
CLVS2	0.1	0.03	0.03	0	0.79	0.15	0.67	0.5	1.02	0.52	0,0,0/c1	Fin-specific	no-mutants
UPB1	0.1	0.14	0.15	0.1	17.24	18.03	20.98	23.76	20.79	33.52	0,0,0/c1	Fin-specific	no-mutants
OMD	0.7	0.26	0.24	0.43	4.1	9.19	17.99	21.73	17.9	12.13	0,0,0/c1	Fin-specific	probably-unrelated
ENTHD2	-	-	-	-	0.63	0.38	0.2	0.4	1.06	0.55	0,0,0/c1	Fin-specific	no-mutants
GRIK2	0.3	0.3	0.52	0.76	3.69	2.47	4.67	6.72	4.24	5.18	0,0,0/c1	Fin-specific	probably-unrelated
VWA7	0.09	0	0.03	0.02	1.59	2.27	3.71	4.65	2.59	2.7	0,0,0/c1	Fin-specific	no-mutants
ADCY8	0.01	0.02	0.1	0.2	0.43	0.57	1.38	1.54	0.93	0.74	0,0,0/c1	Fin-specific	probably-unrelated
IRGC1	0.02	0	0	0	1.26	1.41	1.86	2.86	1.13	2.31	0,0,0/c1	Fin-specific	no-mutants
KLHL14	0.01	0.14	0.24	0.34	2.12	1.62	5.24	5.54	2.89	3.05	0,0,0/c1	Fin-specific	probably-unrelated
LOC106705668	-	-	-	-	2.49	0.42	0.07	1.03	2.41	1.67	0,0,0/c1	Fin-specific	no-mutants
CEMIP	0.09	0.05	0.14	0.95	2.12	4.2	10.76	8.39	5.73	4.68	0,0,0/c1	Fin-specific	probably-unrelated
LOC102357748	-	-	-	-	0.86	1.07	1.09	1.45	0.45	1.69	0,0,0/c1	Fin-specific	no-mutants
ITIH4	0.03	0	0.06	0.03	0.09	0.68	0.99	1.33	0.9	0.45	0,0,0/c1	Fin-specific	probably-unrelated
ADCYAP1	0.03	0.14	0.1	0.48	0.61	2.96	10.17	11.08	7.41	2.56	0,0,0/c1	Fin-specific	probably-unrelated
MXRA5	-	-	-	-	1.21	2.3	4.08	5.3	3.8	2.62	0,0,0/c1	Fin-specific	no-mutants
LOC102357331	-	-	-	-	0.6	0.54	0.54	0.7	0.82	1.09	0,0,0/c1	Fin-specific	no-mutants
LOC103185852	-	-	-	-	0.74	2.85	1.34	1.72	2.84	1.17	0,0,0/c1	Fin-specific	no-mutants
LOC102356697	-	-	-	-	0.6	0.61	0.71	0.93	0.65	1.17	0,0,0/c1	Fin-specific	no-mutants
SLC18A2	0.17	0.36	0.73	0.65	0.68	0.24	0.15	1.06	0.83	0.63	0,0,0/c1	Fin-specific	probably-unrelated
MGST2	0.32	0.23	1	0.38	1.3	4.4	2.52	2.21	4.23	2.09	0,0,0/c1	Fin-specific	probably-unrelated
LOC103189097	-	-	-	-	1.6	2.8	4.05	5.17	2.79	3.25	0,0,0/c1	Fin-specific	no-mutants
LOC102356578	-	-	-	-	0.71	0.63	0.98	1.27	0.69	1.45	0,0,0/c1	Fin-specific	no-mutants
SDR16C5	0	0	0	0	8.17	7.15	0.7	5.45	12.26	6.75	0,0,0/c1	Fin-specific	no-mutants
LOC103181077	-	-	-	-	1.14	4.39	3.49	2.17	5.51	1.97	0,0,0/c1	Fin-specific	no-mutants
LOC103186103	-	-	-	-	0.53	0.48	0	0.92	1.05	0.64	0,0,0/c1	Fin-specific	no-mutants
LOC421419	-	-	-	-	0.7	0.57	1.7	2.09	1.36	1.24	0,0,0/c1	Fin-specific	no-mutants
LOC103190156	-	-	-	-	3.73	4.39	4.78	5.32	6.34	8.34	0,0,0/c1	Fin-specific	no-mutants
NOS1	0.17	0.25	0.24	0.24	3.32	4.12	3.98	8.91	5.55	7.29	0,0,0/c1	Fin-specific	probably-unrelated
LOC102564354	-	-	-	-	0.04	0.38	1.01	0.44	0.64	0.8	0,0,0/c1	Fin-specific	no-mutants
ACAA1B	0.37	0.43	0.52	0.66	3.57	6.78	7.59	5.84	6.54	9.9	0,0,0/c1	Fin-specific	probably-unrelated
KCNG1	0.95	0.41	0.56	0.74	1.97	1.05	0.87	0.92	2.59	1.69	0,0,0/c1	Fin-specific	no-mutants
F2	0.01	0.02	0.12	0.49	0.93	0.75	0.53	0.6	1.42	0.79	0,0,0/c1	Fin-specific	embryonic lethality during organogenesis, incomplete penetrance,embryonic lethality, incomplete penetrance
HHIPL1	0.05	0.09	0.12	0.46	1.31	1.16	1.65	1.33	2.08	2.56	0,0,0/c1	Fin-specific	probably-unrelated
TRY10	0	0	0	0	11.42	11.39	2.87	12.14	19.64	6.83	0,0,0/c1	Fin-specific	no-mutants
LOC102349675	-	-	-	-	2.07	3.43	4.84	3.98	3.77	6.05	0,0,0/c1	Fin-specific	no-mutants
LOC103181135	-	-	-	-	0.79	1.12	1.24	1.5	1.28	2	0,0,0/c1	Fin-specific	no-mutants
NRG2	0.13	0.11	0.17	0.37	0.5	0.32	0.67	1.02	0.74	0.66	0,0,0/c1	Fin-specific	probably-unrelated
LUZP2	0.02	0.05	0.45	0.69	1.19	3.12	8.89	10.81	7.67	8.44	0,0,0/c1	Fin-specific	probably-unrelated
MCRIP2	-	-	-	-	2.44	2.6	3.9	5.63	4.4	6.83	0,0,0/c1	Fin-specific	no-mutants
SUGCT	0.09	0.17	0.52	0.17	3.88	3.3	5.13	6.46	7.53	9.2	0,0,0/c1	Fin-specific	no-mutants
AGBL4	0.02	0	0.05	0	0.82	0.05	0.27	0.77	1.23	0.75	0,0,0/c1	Fin-specific	probably-unrelated
LOC102346586	-	-	-	-	0.4	0.85	0.62	0.87	0.8	1.23	0,0,0/c1	Fin-specific	no-mutants
FBN3	-	-	-	-	70.84	44.85	70.01	92.02	94.69	130.08	0,0,0/c1	Fin-specific	no-mutants
RIBC2	0	0.07	0.27	0.56	2.31	1.73	2.51	3.53	4.04	5.19	0,0,0/c1	Fin-specific	no-mutants
NR4A3	0.03	0.09	0.2	0.33	0.42	0.34	2.8	0.78	2.06	2.23	0,0,0/c1	Fin-specific	embryonic lethality between somite formation and embryo turning, complete penetrance
LOC102365446	-	-	-	-	1.27	1.5	2.35	1.82	2.19	3.25	0,0,0/c1	Fin-specific	no-mutants
SERPIND1	0.06	0	0.09	0.26	13.38	11.25	16.85	20.01	21.31	29.64	0,0,0/c1	Fin-specific	embryonic lethality between somite formation and embryo turning, complete penetrance
TFPI2	0.66	0.81	0.28	0.79	0.26	0.44	2.43	2.8	1.68	1.99	0,0,0/c1	Fin-specific	no-mutants
RPRML	0	0.27	0.08	0.19	0.53	0.83	1.52	2.46	1.5	1.82	0,0,0/c1	Fin-specific	no-mutants
RETREG1	-	-	-	-	1	0.97	1.42	1.86	1.3	2.27	0,0,0/c1	Fin-specific	probably-unrelated
CASS4	0.03	0.04	0.09	0.21	5.01	3.88	5.05	4.67	6.37	9.08	0,0,0/c1	Fin-specific	no-mutants
CALCR	0.4	0.38	0.25	0.07	0.26	0.31	2.45	2.85	1.3	0.97	0,0,0/c1	Fin-specific	embryonic lethality during organogenesis, complete penetrance
LOC102362258	-	-	-	-	1.04	1.86	2.09	1.81	1.6	3.07	0,0,0/c1	Fin-specific	no-mutants
CRHR2	0.04	0	0	0.09	0.7	0.58	0.78	0.95	1.14	1.48	0,0,0/c1	Fin-specific	probably-unrelated
LOC103186698	-	-	-	-	0.06	0.38	1.05	0.32	0.75	0.43	0,0,0/c1	Fin-specific	no-mutants
GCH1	0.66	0.75	0.68	0.69	0.28	1.07	1.29	1.99	1.12	1.43	0,0,0/c1	Fin-specific	embryonic lethality during organogenesis, complete penetrance
MGTNIPA2L	-	-	-	-	1.05	0	0.14	0.57	1.4	0.5	0,0,0/c1	Fin-specific	no-mutants
LOC102347731	-	-	-	-	2.47	3.89	3.71	4.14	4.53	6.74	0,0,0/c1	Fin-specific	no-mutants
LOC107077076	-	-	-	-	0.15	0.49	1.54	1.12	0.73	1.14	0,0,0/c1	Fin-specific	no-mutants
ANO3	0.01	0.04	0.01	0.02	0.64	0.77	2.57	3.72	2.09	2.2	0,0,0/c1	Fin-specific	no-mutants
CDCA4L	-	-	-	-	2.19	2.45	3.37	3.42	3.69	5.52	0,0,0/c1	Fin-specific	no-mutants
SHISA8	0.38	0.17	0.05	0.16	1.55	0.26	0.24	0.12	0.12	0	119,0,136/c2	Fin-specific	no-mutants
LOC102348842	-	-	-	-	1.94	0.35	0	0.07	0.07	0.07	119,0,136/c2	Fin-specific	no-mutants
LOC103178495	-	-	-	-	88.2	19.52	5.39	5.13	6.19	3.5	119,0,136/c2	Fin-specific	no-mutants
OPRD1	0.27	0.1	0.16	0.29	2.17	0.73	0.11	0.03	0.11	0.12	119,0,136/c2	Fin-specific	probably-unrelated
LOC103182178	-	-	-	-	1.26	0.18	0	0.14	0	0	119,0,136/c2	Fin-specific	no-mutants
ZNF883	-	-	-	-	2.63	0.74	0.04	0.17	0.27	0.21	119,0,136/c2	Fin-specific	no-mutants
TDRD9	0.16	0.29	0.19	0.28	3.81	1.67	0.36	0.39	0.8	0.22	119,0,136/c2	Fin-specific	probably-unrelated
GPR39	0.02	0.01	0.05	0	3.37	1.49	0.76	0.56	0.46	0.05	119,0,136/c2	Fin-specific	probably-unrelated
LOC103178493	-	-	-	-	22.04	10.84	1.63	1.75	2	1.64	119,0,136/c2	Fin-specific	no-mutants
LOC102358538	-	-	-	-	1.6	0.61	0.17	0.32	0.23	0.11	119,0,136/c2	Fin-specific	no-mutants
RET	0.37	0.16	0.12	0.24	6.81	2.54	1.4	0.86	0.46	1.19	119,0,136/c2	Fin-specific	probably-unrelated
LOC102366449	-	-	-	-	1.76	0.69	0.46	0.1	0.18	0.16	119,0,136/c2	Fin-specific	no-mutants
GRID2	0	0.06	0.32	0.76	6.77	2.75	1.35	1.01	1.05	0.33	119,0,136/c2	Fin-specific	hindlimb paralysis
EFCAB6	0.05	0.06	0.07	0.04	6.52	2.78	1.53	0.98	0.95	0.27	119,0,136/c2	Fin-specific	no-mutants
ZMYND15	0.03	0.03	0.06	0.12	1.09	0.5	0.05	0.11	0.16	0.1	119,0,136/c2	Fin-specific	no-mutants
LOC102348691	-	-	-	-	3.04	1.17	0.21	0.17	0.08	0.1	119,0,136/c2	Fin-specific	no-mutants
COL10A1	0.01	0	0.03	0.45	4.94	2.18	0.35	0.11	0.68	0.24	119,0,136/c2	Fin-specific	abnormal femur morphology,abnormal pelvic girdle bone morphology
LOC102367588	-	-	-	-	2.37	1.05	0.25	0.18	0.06	0.28	119,0,136/c2	Fin-specific	no-mutants
MUC6	0	0	0	0	2.57	1.2	0.4	0.55	0.75	0.34	119,0,136/c2	Fin-specific	no-mutants
TOPAZ1	0.01	0	0	0	1.86	0.67	0.38	0.47	0.55	0.19	119,0,136/c2	Fin-specific	probably-unrelated
IL12RB2	0.02	0.05	0.04	0.26	1.54	0.61	0.37	0.35	0.26	0.27	119,0,136/c2	Fin-specific	probably-unrelated
SPTBN4	0.13	0.21	0.16	0.2	7.26	2.03	2.23	1.4	1.16	1.99	119,0,136/c2	Fin-specific	hindlimb paralysis
ELFN1	0.02	0.09	0.3	0.91	5.08	2.03	1.41	1.08	1.3	1.45	119,0,136/c2	Fin-specific	probably-unrelated
LOC103178492	-	-	-	-	2.86	0.96	0.42	0.35	1.14	0.24	119,0,136/c2	Fin-specific	no-mutants
LOC102348584	-	-	-	-	2.86	1.03	0.77	0.5	0.48	0.49	119,0,136/c2	Fin-specific	no-mutants
FLVCR1	-	-	-	-	126.99	51.53	22.94	22.09	25.39	19.87	119,0,136/c2	Fin-specific	abnormal limb development,abnormal autopod morphology,abnormal digit development,embryonic lethality during organogenesis, incomplete penetrance
NTRK1	0.07	0.1	0.2	0.98	1.3	0.54	0.24	0.32	0.09	0.16	119,0,136/c2	Fin-specific	abnormal digit morphology
ATP6V1B1	0	0	0	0	7.98	2.58	1.63	1.11	1.35	1.56	119,0,136/c2	Fin-specific	probably-unrelated
HTR1B	0.05	0.23	0.22	0.76	1.54	0.33	0.26	0.2	0.26	0.29	119,0,136/c2	Fin-specific	probably-unrelated
LOC103176483	-	-	-	-	16.55	5.84	2.94	3.34	3.35	1.38	119,0,136/c2	Fin-specific	no-mutants
HELT	0	0	0	0	1.23	0.4	0.2	0.17	0.17	0.2	119,0,136/c2	Fin-specific	probably-unrelated
DNAH3	-	-	-	-	3.26	1.04	0.55	0.57	1.19	0.8	119,0,136/c2	Fin-specific	no-mutants
LOC103180127	-	-	-	-	4.36	1.3	0.35	0.43	1.16	1.53	119,0,136/c2	Fin-specific	no-mutants
LOC103174491	-	-	-	-	6.97	2.58	0.59	0.76	2.42	2.79	119,0,136/c2	Fin-specific	no-mutants
PTPRO	0.01	0.08	0.38	0.59	11.46	4.61	3.23	2.23	3.32	3.39	119,0,136/c2	Fin-specific	probably-unrelated
LRRC23	0.11	0.22	0.38	0.4	4.35	1.51	0.81	0.99	1.29	0.82	119,0,136/c2	Fin-specific	probably-unrelated
LOC102568476	-	-	-	-	1.24	0.15	0.11	0.54	0.11	0.43	119,0,136/c2	Fin-specific	no-mutants
LOC103188796	-	-	-	-	8.76	1.76	0.61	2.66	3.14	2.06	119,0,136/c2	Fin-specific	no-mutants
TEX11	0.04	0.01	0	0	3.24	1.36	0.25	0.54	1.62	0.55	119,0,136/c2	Fin-specific	probably-unrelated
TUT4	-	-	-	-	5.23	1.45	0.5	1.3	1.55	0.94	119,0,136/c2	Fin-specific	probably-unrelated
LOC102354318	-	-	-	-	1.48	0.36	0.35	0.15	0.44	0.32	119,0,136/c2	Fin-specific	no-mutants
LOC106737823	-	-	-	-	1.05	0.23	0	0.17	0.09	0.37	119,0,136/c2	Fin-specific	no-mutants
DDX39A	-	-	-	-	19.46	10	4.9	2.92	4.53	3.37	119,0,136/c2	Fin-specific	no-mutants
BTNL2	0.01	0.02	0	0.04	1.7	0.94	0.12	0.33	0	0.57	119,0,136/c2	Fin-specific	no-mutants
LOC102355137	-	-	-	-	16.19	6.9	5.89	3.31	3.32	2.28	119,0,136/c2	Fin-specific	no-mutants
LOC103173090	-	-	-	-	8.01	3.32	3.1	2.15	0.54	1.83	119,0,136/c2	Fin-specific	no-mutants
NFASC	0.06	0.08	0.12	0.18	4.15	2.16	1.03	0.76	0.47	0.64	119,0,136/c2	Fin-specific	probably-unrelated
FAM57B	0.07	0.2	0.32	0.21	5.31	2.49	1.91	0.74	1.17	0.87	119,0,136/c2	Fin-specific	no-mutants
CNGA3	0.04	0.03	0.02	0	3.92	1.98	1.1	0.75	0.75	0.25	119,0,136/c2	Fin-specific	probably-unrelated
LOC102567728	-	-	-	-	1.45	0.91	0	0.14	0.23	0.4	119,0,136/c2	Fin-specific	no-mutants
GPR25	0.04	0.05	0.04	0.97	4.31	2.29	1.08	0.67	0.6	0.21	119,0,136/c2	Fin-specific	no-mutants
TMEM71	0.01	0.04	0.07	0.11	14.67	7.54	4.77	3.63	3.83	2.98	119,0,136/c2	Fin-specific	no-mutants
GRM3	0.01	0.05	0	0.49	3.28	1.44	1.25	1	0.29	1.14	119,0,136/c2	Fin-specific	probably-unrelated
LOC103184983	-	-	-	-	1.03	0.56	0.23	0.22	0.24	0.4	119,0,136/c2	Fin-specific	no-mutants
NLRC5	0	0	0.01	0.01	3.2	1.48	1.23	1.07	0.64	0.69	119,0,136/c2	Fin-specific	probably-unrelated
CEBPE	0	0.04	0.04	0	10.02	4.99	3.91	3.04	1.53	2.8	119,0,136/c2	Fin-specific	probably-unrelated
RIMBP2	0.03	0.06	0.1	0.06	4.96	2.06	1.86	1.34	0.58	1.49	119,0,136/c2	Fin-specific	probably-unrelated
LOC102360809	-	-	-	-	1.33	0.64	0.31	0.41	0.52	0.22	119,0,136/c2	Fin-specific	no-mutants
LOC102361544	-	-	-	-	125.35	61.11	45.12	35.84	29.2	39.45	119,0,136/c2	Fin-specific	no-mutants
LOC103185741	-	-	-	-	2.02	0.8	0.75	0.64	0.6	0.49	119,0,136/c2	Fin-specific	no-mutants
SPTBN4L	-	-	-	-	1.04	0.29	0.41	0.31	0.25	0.19	119,0,136/c2	Fin-specific	no-mutants
LOC102558673	-	-	-	-	9.35	4.12	2.63	2.28	1.78	2.43	119,0,136/c2	Fin-specific	no-mutants
CATSPER2	0.46	0.12	0.21	0.32	3.64	1.57	1.12	0.93	1.01	0.48	119,0,136/c2	Fin-specific	probably-unrelated
LOC107078604	-	-	-	-	1.17	0.4	0.31	0.43	0.44	0.2	119,0,136/c2	Fin-specific	no-mutants
RYR2	0.04	0.01	0.07	0.1	6.99	2.85	0.84	1.98	1.51	2.64	119,0,136/c2	Fin-specific	embryonic lethality prior to tooth bud stage,embryonic lethality during organogenesis, complete penetrance,embryonic lethality, complete penetrance
LOC103187253	-	-	-	-	2.38	0.76	0.34	0.9	0.23	0.67	119,0,136/c2	Fin-specific	no-mutants
RASEF	0.53	0.55	0.59	0.93	4.76	3.47	2.26	1.47	1.28	0.79	119,0,136/c2	Fin-specific	no-mutants
LOC103176485	-	-	-	-	17.88	12.05	6.78	5.84	3.53	2.68	119,0,136/c2	Fin-specific	no-mutants
LOC103177507	-	-	-	-	5.21	3.97	1.63	1.29	1.53	0.85	119,0,136/c2	Fin-specific	no-mutants
CFAP65	0	0	0	0	2.67	1.87	1.17	0.7	0.7	0.68	119,0,136/c2	Fin-specific	no-mutants
CFAP100	0.01	0	0.04	0.04	3.08	2	1.46	0.92	0.61	0.54	119,0,136/c2	Fin-specific	no-mutants
ASIC4	0.74	0.72	0.15	0.61	5.4	3.22	2.42	1.49	0.87	0.9	119,0,136/c2	Fin-specific	probably-unrelated
FGF22	0	0.19	0	0	27.29	19.3	11.1	4.67	3.63	1.33	119,0,136/c2	Fin-specific	probably-unrelated
LOC102362624	-	-	-	-	3.61	2.01	1.81	0.97	0.64	0.25	119,0,136/c2	Fin-specific	no-mutants
LRP2	0.14	0.04	0.04	0.02	9.64	6.41	3.54	2.16	2.33	1.29	119,0,136/c2	Fin-specific	probably-unrelated
ABCA4	0.43	0.51	0.72	0.63	8.59	6.22	2.65	1.98	1.98	0.88	119,0,136/c2	Fin-specific	probably-unrelated
VWDE	0.18	0.63	0.53	0.33	12.12	8.12	4.98	2.83	2.69	1.75	119,0,136/c2	Fin-specific	no-mutants
KLK15	0.18	0	0.48	0	1.19	0.62	0.39	0.22	0.22	0.05	119,0,136/c2	Fin-specific	no-mutants
CCDC33	0.01	0.06	0	0.15	4.51	2.88	0.53	0.66	0.46	0.14	119,0,136/c2	Fin-specific	probably-unrelated
HOXB13	0.03	0	0	0	3.67	2.4	0.64	0.47	0.49	0.28	119,0,136/c2	Fin-specific	abnormal tail morphology
MYO1H	0.04	0.05	0.11	0.1	1.46	1.01	0.49	0.07	0.02	0.01	119,0,136/c2	Fin-specific	probably-unrelated
BTBD17	0.01	0.24	0.45	0.97	1.74	1.15	0.28	0	0.06	0.24	119,0,136/c2	Fin-specific	no-mutants
UMODL1	0.04	0.04	0.03	0.06	3.52	2.25	1.16	0.48	0.39	0.27	119,0,136/c2	Fin-specific	no-mutants
LOC102349405	-	-	-	-	3.37	2.21	1.12	0.62	0.51	0.88	119,0,136/c2	Fin-specific	no-mutants
ZNF385C	-	-	-	-	5.41	3.24	2.09	1.66	1.36	1.1	119,0,136/c2	Fin-specific	no-mutants
FAM227A	0.12	0.07	0.09	0.09	3.72	2.06	1.27	1.01	0.75	0.55	119,0,136/c2	Fin-specific	no-mutants
LHX1	0.3	0.04	0.38	0	2.03	1.24	0.76	0.5	0.32	0.18	119,0,136/c2	Fin-specific	embryonic lethality during organogenesis, incomplete penetrance,embryonic lethality during organogenesis, complete penetrance
LOC102360863	-	-	-	-	2.48	1.56	0.85	0.56	0.35	0.51	119,0,136/c2	Fin-specific	no-mutants
LOC103182585	-	-	-	-	21.3	11.74	6.41	5.2	2.68	5.58	119,0,136/c2	Fin-specific	no-mutants
LOC102347837	-	-	-	-	1.38	0.94	0.26	0.19	0.19	0.4	119,0,136/c2	Fin-specific	no-mutants
LOC102352752	-	-	-	-	1.62	0.95	0.41	0.63	0.36	0.29	119,0,136/c2	Fin-specific	no-mutants
LOC103176722	-	-	-	-	13.94	7.84	4.77	4.22	4.37	3.89	119,0,136/c2	Fin-specific	no-mutants
RSPH1	0.48	0.4	0.45	0.38	1.66	0.98	0.64	0.58	0.53	0.23	119,0,136/c2	Fin-specific	probably-unrelated
CCDC150	0.17	0.14	0.1	0.09	5.62	3.32	1.75	2.04	1.74	0.97	119,0,136/c2	Fin-specific	no-mutants
MYCS	0.01	0.02	0	0	169.23	95.36	63.2	47.96	44.55	36.3	119,0,136/c2	Fin-specific	no-mutants
SKAP1	0.16	0.04	0.06	0.17	12.61	7.41	3.02	2.55	3.31	2.79	119,0,136/c2	Fin-specific	probably-unrelated
DNAJB13	0	0	0	0.08	2.66	1.34	1.18	0.44	1.16	0.15	119,0,136/c2	Fin-specific	no-mutants
GSAP	0.19	0.21	0.59	0.85	2.6	1.48	0.94	0.74	0.88	0.55	119,0,136/c2	Fin-specific	no-mutants
LOC106703128	-	-	-	-	1.66	0.95	0.72	0.48	0.7	0.65	119,0,136/c2	Fin-specific	no-mutants
LOC102695071	-	-	-	-	1.16	0.33	0.11	0.24	0.47	0.71	119,0,136/c2	Fin-specific	no-mutants
DNAH14	-	-	-	-	54.01	4.03	1	25.72	42.85	0.64	119,0,136/c2	Fin-specific	no-mutants
LOC418114	-	-	-	-	3.33	1.01	1.24	1.72	0.72	1.61	119,0,136/c2	Fin-specific	no-mutants
ICOSLG	-	-	-	-	1.19	0.09	0.3	0.24	0.79	0.46	119,0,136/c2	Fin-specific	no-mutants
MAP6D1	0.2	0.22	0.24	0.59	21.17	12.78	8.75	8.34	8.16	9.43	119,0,136/c2	Fin-specific	no-mutants
LOC102361405	-	-	-	-	2.97	1.18	1.25	1.07	0.73	1.36	119,0,136/c2	Fin-specific	no-mutants
EEF1AKMT3	-	-	-	-	5.95	2.93	1.64	2.96	3.01	1.41	119,0,136/c2	Fin-specific	no-mutants
PLEKHD1	0.04	0	0.03	0.03	1.2	0.62	0.31	0.78	0.45	0.36	119,0,136/c2	Fin-specific	no-mutants
LOC102363464	-	-	-	-	6	2.98	2.61	1.95	2.5	2.48	119,0,136/c2	Fin-specific	no-mutants
PIWIL2	0.04	0.04	0.07	0.06	1.21	0.51	0.19	0.72	0.33	0.53	119,0,136/c2	Fin-specific	probably-unrelated
KIAA0319	-	-	-	-	1.38	0.49	0.6	0.74	0.15	0.69	119,0,136/c2	Fin-specific	no-mutants
DCST1	0	0.02	0	0	1.11	0.36	0.5	0.53	0.25	0.41	119,0,136/c2	Fin-specific	no-mutants
PLEKHG4	0.08	0.05	0.03	0.1	23.63	11.67	9.22	9.98	8.87	9.33	119,0,136/c2	Fin-specific	no-mutants
CATSPER4	0	0	0	0	1.07	0.64	0.21	0.31	0.53	0.26	119,0,136/c2	Fin-specific	probably-unrelated
LOC102361566	-	-	-	-	88.1	44.05	31.68	32.03	34.52	27.33	119,0,136/c2	Fin-specific	no-mutants
LINGO4	0	0	0	0.02	3.66	1.94	1.56	1.42	1.31	1.56	119,0,136/c2	Fin-specific	no-mutants
PSD2	0.46	0.31	0.55	0.87	2.31	1.53	0.9	0.55	1.03	1.07	119,0,136/c2	Fin-specific	no-mutants
CELF3	0.09	0.13	0.05	0.02	4.95	2.36	2.41	1.67	1.78	1.95	119,0,136/c2	Fin-specific	probably-unrelated
CAR10	0.02	0.05	0.01	0.17	17.86	8.35	5.2	5.23	5.14	8.39	119,0,136/c2	Fin-specific	no-mutants
TREH	0	0	0	0	2.07	1.07	0.5	0.75	1.13	0.22	119,0,136/c2	Fin-specific	probably-unrelated
LOC102349388	-	-	-	-	6.49	2.65	1.78	2.08	1.72	3.02	119,0,136/c2	Fin-specific	no-mutants
LOC102355420	-	-	-	-	11.16	5.39	5.08	4.32	3.06	3.52	119,0,136/c2	Fin-specific	no-mutants
ZNF148	-	-	-	-	2.16	1.05	0.68	1.27	0.63	0.76	119,0,136/c2	Fin-specific	no-mutants
LOC102350191	-	-	-	-	1.7	0.56	0.85	0.65	0.71	0.48	119,0,136/c2	Fin-specific	no-mutants
LOC102357746	-	-	-	-	19.7	10.8	8.32	6.43	5.93	6.44	119,0,136/c2	Fin-specific	no-mutants
LOC103186310	-	-	-	-	1.05	0.43	0.33	0.4	0.33	0.24	119,0,136/c2	Fin-specific	no-mutants
SYN2	0.03	0.2	0.69	0.77	2.11	0.9	0.68	0.68	0.5	0.8	119,0,136/c2	Fin-specific	probably-unrelated
LOC106706821	-	-	-	-	2.78	1.28	1.11	0.87	0.65	0.73	119,0,136/c2	Fin-specific	no-mutants
PTPRN	0.16	0.08	0.12	0.05	4.68	2.04	1.78	1.96	1.28	1.11	119,0,136/c2	Fin-specific	probably-unrelated
CFAP46	0.01	0.01	0.03	0.05	3.04	0.84	0.18	0.31	1.1	1.54	119,0,136/c2	Fin-specific	no-mutants
LOC102360937	-	-	-	-	2.28	0.16	0.35	0.61	0.78	1	119,0,136/c2	Fin-specific	no-mutants
LOC103181448	-	-	-	-	1.04	0.15	0.08	0.33	0.16	0.51	119,0,136/c2	Fin-specific	no-mutants
LOC102576311	-	-	-	-	1.04	0.24	0.11	0.52	0.16	0.57	119,0,136/c2	Fin-specific	no-mutants
GRID1	0.07	0.1	0.12	0.85	1.24	0.78	0.8	0.55	0	0.38	119,0,136/c2	Fin-specific	probably-unrelated
LOC102350131	-	-	-	-	1.32	0.59	1.02	0.21	0.32	0.19	119,0,136/c2	Fin-specific	no-mutants
CFAP54	-	-	-	-	1.03	0.69	0.55	0.35	0.43	0.34	119,0,136/c2	Fin-specific	probably-unrelated
LOC102359386	-	-	-	-	1.22	0.82	0.61	0.53	0.38	0.21	119,0,136/c2	Fin-specific	no-mutants
NEK5	0	0	0.02	0.04	2.02	1.34	1.07	0.94	0.64	0.53	119,0,136/c2	Fin-specific	probably-unrelated
LOC102353540	-	-	-	-	2.63	1.75	1.51	0.88	1.02	0.88	119,0,136/c2	Fin-specific	no-mutants
LOC103178603	-	-	-	-	1.6	1.17	0.61	0.5	0.85	0.23	119,0,136/c2	Fin-specific	no-mutants
LOC103175490	-	-	-	-	5.31	3.67	2.26	2.05	2.46	1.48	119,0,136/c2	Fin-specific	no-mutants
ENO4	0.28	0.12	0.34	0.22	2.66	1.61	1.36	1.01	0.99	0.65	119,0,136/c2	Fin-specific	probably-unrelated
CCDC39	0.23	0.36	0.48	0.57	3.08	1.86	2.01	1.26	1.22	0.98	119,0,136/c2	Fin-specific	probably-unrelated
KCNH6	0.01	0	0.02	0.02	9.14	4.86	5.45	4.03	2.09	2.99	119,0,136/c2	Fin-specific	no-mutants
LOC102350738	-	-	-	-	1.01	0.64	0.47	0.41	0.36	0.3	119,0,136/c2	Fin-specific	no-mutants
IQCA	0	0	0.02	0.12	3.88	2.41	1.95	1.37	1.37	1.26	119,0,136/c2	Fin-specific	no-mutants
LOC106706083	-	-	-	-	4.31	2.58	2.45	1.72	1.58	1.21	119,0,136/c2	Fin-specific	no-mutants
LOC102362179	-	-	-	-	3.34	2.23	1.3	1.35	0.91	0.94	119,0,136/c2	Fin-specific	no-mutants
LOC106705525	-	-	-	-	1.23	0.67	0.67	0.38	0.22	0.31	119,0,136/c2	Fin-specific	no-mutants
LOC103179522	-	-	-	-	1.45	1.09	0.44	0.48	0.64	0.21	119,0,136/c2	Fin-specific	no-mutants
FOXN4	0.01	0.03	0.03	0.02	1.81	1.15	0.84	0.77	0.54	0.39	119,0,136/c2	Fin-specific	probably-unrelated
TMEM131L	-	-	-	-	18.97	12.1	8.28	7.02	6.61	5.09	119,0,136/c2	Fin-specific	no-mutants
LOC106704465	-	-	-	-	6.03	4.03	2.24	2.15	1.89	1.82	119,0,136/c2	Fin-specific	no-mutants
ADAMTS6	0.23	0.19	0.48	0.99	9.83	5.91	3.99	3.88	2.94	2.36	119,0,136/c2	Fin-specific	abnormal hindlimb morphology
ZNF519	-	-	-	-	5.16	3.38	1.95	0.51	2.32	2.71	119,0,136/c2	Fin-specific	no-mutants
SYT10	0	0	0	0	1.83	0.96	0.55	0.44	0.46	0.76	119,0,136/c2	Fin-specific	probably-unrelated
STRC	0	0	0	0	2.09	1.13	0.78	0.78	0.78	0.67	119,0,136/c2	Fin-specific	probably-unrelated
LOC102348931	-	-	-	-	3.73	2.25	1.94	1.36	1.7	0.59	119,0,136/c2	Fin-specific	no-mutants
LOC102362531	-	-	-	-	1.75	0.63	0.95	0.59	0.6	0.27	119,0,136/c2	Fin-specific	no-mutants
TSPEAR	0.62	0.33	0.48	0.41	2.32	1.34	0.98	0.97	1.05	0.54	119,0,136/c2	Fin-specific	no-mutants
CCDC65	0.11	0.27	0.45	0.36	5.57	3.67	2.25	2.46	2.32	1.22	119,0,136/c2	Fin-specific	no-mutants
LOC102366311	-	-	-	-	8.93	4.31	5.02	3.69	3.46	2.18	119,0,136/c2	Fin-specific	no-mutants
LOC102366770	-	-	-	-	1.5	0.71	0.46	0.3	0.13	0.84	119,0,136/c2	Fin-specific	no-mutants
CNTNAP1	0.02	0.01	0.07	0.1	7.36	4.8	2.04	2.41	2.5	2.33	119,0,136/c2	Fin-specific	probably-unrelated
LOC422308	-	-	-	-	1.07	0.49	0.52	0.26	0.44	0.08	119,0,136/c2	Fin-specific	no-mutants
GMNC	0.01	0.09	0.52	0.18	5.04	2.75	2.12	1.64	1.69	1.03	119,0,136/c2	Fin-specific	probably-unrelated
UNC80	0	0	0.02	0.03	6.35	3.47	2.4	2.05	2.48	1.29	119,0,136/c2	Fin-specific	no-mutants
SLC12A3	0.01	0	0	0	2.13	1.16	0.78	0.21	0.78	0.79	119,0,136/c2	Fin-specific	probably-unrelated
KLK11	0	0	0	0.04	2.09	1.35	0.31	0.43	0.59	1.05	119,0,136/c2	Fin-specific	no-mutants
LOC102346156	-	-	-	-	11.27	5.66	4.46	3.66	3.42	3.56	119,0,136/c2	Fin-specific	no-mutants
PLB1	0.14	0.1	0.19	0.05	13.01	6.54	4.8	4.9	3.73	3.23	119,0,136/c2	Fin-specific	no-mutants
LOC102357592	-	-	-	-	3.55	2.13	1.08	1.19	1.09	1.12	119,0,136/c2	Fin-specific	no-mutants
LOC102357669	-	-	-	-	8.36	3.88	3.64	2.41	3.93	1.41	119,0,136/c2	Fin-specific	no-mutants
LOC103181883	-	-	-	-	4.83	2.35	2.25	2	1.47	1.05	119,0,136/c2	Fin-specific	no-mutants
CFAP44	0.04	0.03	0.03	0.02	5.03	2.57	2.1	1.89	1.59	1.17	119,0,136/c2	Fin-specific	probably-unrelated
LOC102354822	-	-	-	-	1.92	0.65	0.55	0.73	0.67	2.45	119,0,136/c2	Fin-specific	no-mutants
ASZ1	0.16	0	0	0	1.32	1.81	1.38	0.89	0.51	0.12	119,0,136/c2	Fin-specific	probably-unrelated
SYN1	0.06	0.06	0.06	0.4	10.83	16.96	7.66	7.63	8.95	3.04	119,0,136/c2	Fin-specific	probably-unrelated
LOC103182454	-	-	-	-	0.85	1.11	0.79	0.5	0.39	0.33	119,0,136/c2	Fin-specific	no-mutants
LOC102576357	-	-	-	-	8.5	15.34	1.67	7.71	0.66	3.39	119,0,136/c2	Fin-specific	no-mutants
LOC102563559	-	-	-	-	2.16	2.84	1.29	1.81	0.13	0.57	119,0,136/c2	Fin-specific	no-mutants
SLC24A4	0	0	0	0.2	0.97	1.64	0.88	0.26	0.17	0.23	119,0,136/c2	Fin-specific	probably-unrelated
SLC2A6	0.32	0.17	0.54	0.28	1.1	1.58	0.89	0.38	0.64	0.5	119,0,136/c2	Fin-specific	no-mutants
FTCD	0.08	0.07	0.06	0.09	2.34	1.71	1.97	0.91	0.55	0.1	119,0,136/c2	Fin-specific	no-mutants
LRRIQ1	0.02	0.02	0.02	0.04	9.55	8.13	5.51	4.4	3.33	2.3	119,0,136/c2	Fin-specific	no-mutants
LOC102359332	-	-	-	-	5.43	3.43	3.55	2.39	1.78	0	119,0,136/c2	Fin-specific	no-mutants
LOC109280563	-	-	-	-	17.32	14.1	12.14	6.66	4.98	5.23	119,0,136/c2	Fin-specific	no-mutants
TRIM40	0	0	0	0	4.74	4.19	2.43	1.61	1.34	1.09	119,0,136/c2	Fin-specific	no-mutants
DAO	0	0.02	0	0	1.11	1.04	0.52	0.29	0.44	0.22	119,0,136/c2	Fin-specific	probably-unrelated
LOC102692558	-	-	-	-	18.24	15.53	11.59	7.38	5.64	2.53	119,0,136/c2	Fin-specific	no-mutants
GM42368	-	-	-	-	1.26	1.19	1.05	0.3	0.18	0.06	119,0,136/c2	Fin-specific	no-mutants
HYAL5	0	0	0	0	6.4	5.76	3.65	2.38	2.1	1.77	119,0,136/c2	Fin-specific	no-mutants
MYH1B	-	-	-	-	0.9	1.37	0.17	0.04	0.18	0.04	119,0,136/c2	Fin-specific	no-mutants
KCNS3	0.08	0.18	0.3	0.68	1.4	1.65	0.84	0.61	0.33	0.12	119,0,136/c2	Fin-specific	no-mutants
LOC102568784	-	-	-	-	0.85	1.27	0.59	0	0	0.32	119,0,136/c2	Fin-specific	no-mutants
LOC102364353	-	-	-	-	2.07	2.9	0.52	0.84	0.66	0.62	119,0,136/c2	Fin-specific	no-mutants
LOC102352358	-	-	-	-	4.3	4.74	2.47	1.14	0.69	0.43	119,0,136/c2	Fin-specific	no-mutants
MAATS1	0.02	0	0.12	0.09	2.01	2.18	1.2	0.54	0.89	0.68	119,0,136/c2	Fin-specific	no-mutants
HAO2	0.05	0.04	0	0.07	4.88	5.96	3.62	1.95	1.84	1.97	119,0,136/c2	Fin-specific	no-mutants
LOC103188831	-	-	-	-	2.91	3.17	1.71	1.25	1.12	0.72	119,0,136/c2	Fin-specific	no-mutants
LOC102576703	-	-	-	-	4.99	5.77	3.5	2.27	1.5	0.63	119,0,136/c2	Fin-specific	no-mutants
ZNF687	-	-	-	-	2.01	2.58	0.63	1.19	0.93	0.74	119,0,136/c2	Fin-specific	no-mutants
OLIG3	0	0	0	0	0.94	1.09	0.54	0.21	0.22	0.19	119,0,136/c2	Fin-specific	probably-unrelated
LOC102350249	-	-	-	-	1.82	1.4	0.4	0.42	0.7	0.19	119,0,136/c2	Fin-specific	no-mutants
LOC102365610	-	-	-	-	7.07	5.12	3.43	2.73	1.96	1.82	119,0,136/c2	Fin-specific	no-mutants
IQCH	0.03	0.11	0.09	0.03	3.6	2.63	2.21	0.8	1.15	0.96	119,0,136/c2	Fin-specific	no-mutants
ACTL7B	0	0	0.03	0	3.2	2.35	1.51	0.76	0.79	0.98	119,0,136/c2	Fin-specific	no-mutants
LOC103183503	-	-	-	-	2.17	1.73	0.73	0.45	0.64	0.27	119,0,136/c2	Fin-specific	no-mutants
NWD2	0.02	0	0.03	0.09	14.02	10	6.92	3.91	4.16	2.57	119,0,136/c2	Fin-specific	no-mutants
TSPOAP1	0.06	0.07	0.12	0.24	1.84	1.46	0.96	0.46	0.48	0.55	119,0,136/c2	Fin-specific	probably-unrelated
GM11992	0.11	0.06	0.03	0.14	4.21	3.36	2.28	0.78	0.16	1.74	119,0,136/c2	Fin-specific	no-mutants
LOC102355689	-	-	-	-	1.8	1.42	0.9	0.54	0.33	0.23	119,0,136/c2	Fin-specific	no-mutants
LOC102351684	-	-	-	-	10.11	10.51	0	0	0.02	0	119,0,136/c2	Fin-specific	no-mutants
C6	0	0.01	0.01	0.03	10.57	8.29	5.95	2.54	0.78	0.78	119,0,136/c2	Fin-specific	probably-unrelated
LOC102358221	-	-	-	-	1.15	1.13	0.2	0.08	0.29	0.37	119,0,136/c2	Fin-specific	no-mutants
LOC102347947	-	-	-	-	1.21	1.04	0.59	0.27	0.29	0.24	119,0,136/c2	Fin-specific	no-mutants
CRB1	0.01	0	0.01	0.01	3.72	4.47	1.43	0.28	0.03	0.04	119,0,136/c2	Fin-specific	probably-unrelated
FOXA1	0.05	0.05	0.08	0.08	2.53	2.1	0.98	0.66	0.67	0.64	119,0,136/c2	Fin-specific	probably-unrelated
MMEL1	0.18	0.04	0.02	0.02	2	1.65	1.14	0.48	0.29	0.24	119,0,136/c2	Fin-specific	probably-unrelated
ITLN1	0	0	0	0	2.2	1.89	1.29	0.43	0.48	0.13	119,0,136/c2	Fin-specific	probably-unrelated
LOC107079406	-	-	-	-	1.83	1.76	0.49	0.77	0.33	0.31	119,0,136/c2	Fin-specific	no-mutants
TTC41	0.79	0.6	0.48	0.58	3.81	2.96	1.79	1.16	1.25	0.68	119,0,136/c2	Fin-specific	no-mutants
LOC102364841	-	-	-	-	12.33	10.11	5.24	4.36	4.41	4.07	119,0,136/c2	Fin-specific	no-mutants
CCDC69	0.27	0.27	0.31	0.66	3.98	3.37	2.03	1.56	1.15	1.11	119,0,136/c2	Fin-specific	no-mutants
CYP2D10	0	0	0	0	1.26	1.03	0.5	0.43	0.35	0.31	119,0,136/c2	Fin-specific	no-mutants
GYG2	-	-	-	-	10.11	8.04	5.45	4.99	1.04	0.54	119,0,136/c2	Fin-specific	no-mutants
WDR88	-	-	-	-	7.42	5.38	4.33	2.71	1.38	1.08	119,0,136/c2	Fin-specific	no-mutants
WDR27	0	0	0	0	3.38	2.49	1.62	1.56	1.29	0.97	119,0,136/c2	Fin-specific	no-mutants
LOC102360780	-	-	-	-	18.79	10.88	11.52	6.62	6.39	4.35	119,0,136/c2	Fin-specific	no-mutants
FANK1	0.02	0.02	0.06	0.05	3.26	2.12	2.41	1.55	1.27	0.58	119,0,136/c2	Fin-specific	no-mutants
PHF21B	0.5	0.12	0.38	0.34	3.18	2.38	1.65	1.74	1.09	0.67	119,0,136/c2	Fin-specific	no-mutants
ADAM8	0.18	0.12	0.26	0.2	4.12	3.78	2	0.95	0.97	2.41	119,0,136/c2	Fin-specific	probably-unrelated
LOC112530477	-	-	-	-	50.36	39.28	19.42	22.46	16.58	14.53	119,0,136/c2	Fin-specific	no-mutants
RAB3C	0.26	0.08	0.1	0.23	11.19	8.29	7.12	4.7	4.17	3.36	119,0,136/c2	Fin-specific	no-mutants
TBATA	0.04	0.04	0.12	0.05	3.27	2.05	2.2	1.59	0.74	0.16	119,0,136/c2	Fin-specific	probably-unrelated
LOC102362150	-	-	-	-	6.23	4.73	4.2	2.6	1.92	0.92	119,0,136/c2	Fin-specific	no-mutants
TAAR1	0	0	0	0	3.5	2.4	2.63	1.75	1.02	0.09	119,0,136/c2	Fin-specific	probably-unrelated
MAPK10	0.02	0.03	0.06	0.12	1.99	1.34	1.21	0.97	0.87	0.26	119,0,136/c2	Fin-specific	probably-unrelated
TNN	0.01	0	0.01	0.3	31.54	23.91	18.55	13.94	12.9	6.51	119,0,136/c2	Fin-specific	no-mutants
LOC103178974	-	-	-	-	1.79	1.17	1.22	0.58	0.59	0.23	119,0,136/c2	Fin-specific	no-mutants
UBE2U	0.22	0.56	0.36	0.32	5.94	4.81	2.58	2.89	2.64	1.13	119,0,136/c2	Fin-specific	probably-unrelated
CHRNA6	0.06	0.05	0	0	1.28	0.6	1.14	0.44	0.43	0.33	119,0,136/c2	Fin-specific	probably-unrelated
LOC106737735	-	-	-	-	2.68	2.12	1.88	1	1.15	0.66	119,0,136/c2	Fin-specific	no-mutants
LOC107078497	-	-	-	-	1	0.6	0.78	0.56	0.23	0.12	119,0,136/c2	Fin-specific	no-mutants
SLC22A16	0.04	0	0	0	8.17	6.54	6.4	3.72	2.28	2.11	119,0,136/c2	Fin-specific	no-mutants
KCNH1	0.06	0	0.09	0.47	2.27	1.24	1.77	1.06	0.93	0.58	119,0,136/c2	Fin-specific	probably-unrelated
LOC102565606	-	-	-	-	5.64	4.8	3.7	2.35	2.62	1.2	119,0,136/c2	Fin-specific	no-mutants
NLRP1L	-	-	-	-	7.23	6.06	4.48	3.41	3.39	2.05	119,0,136/c2	Fin-specific	no-mutants
KCNB1	0.07	0.15	0.25	0.79	2.26	1.43	1.98	1.19	0.77	0.44	119,0,136/c2	Fin-specific	probably-unrelated
LOC103178746	-	-	-	-	1.96	1.59	1.36	0.76	0.73	0.57	119,0,136/c2	Fin-specific	no-mutants
LOC106739708	-	-	-	-	1.76	1.63	0.67	0.25	1.32	0.27	119,0,136/c2	Fin-specific	no-mutants
LOC102357686	-	-	-	-	64.38	16.78	14.49	16.7	31.29	57.44	119,0,136/c2	Fin-specific	no-mutants
MAP3K8	0.72	0.47	0.54	0.51	2.51	2.06	1.67	1.07	1.22	0.93	119,0,136/c2	Fin-specific	probably-unrelated
LOC102356564	-	-	-	-	5.59	6.84	7.64	4.08	1.82	2.89	119,0,136/c2	Fin-specific	no-mutants
LOC102349803	-	-	-	-	0.86	0.75	1.07	0.49	0.23	0.36	119,0,136/c2	Fin-specific	no-mutants
KLHL34	0.05	0.12	0.02	0.02	1.88	0.68	1.27	1.05	0.71	2.2	119,0,136/c2	Fin-specific	no-mutants
LOC103175909	-	-	-	-	1.43	1.47	0.66	0.61	0.86	2.08	119,0,136/c2	Fin-specific	no-mutants
DRD5	0	0.03	0.09	0.02	1.65	0.72	0.76	1.04	0.81	1.72	119,0,136/c2	Fin-specific	probably-unrelated
LOC102366337	-	-	-	-	1.07	0.52	0.48	0.66	0.41	1.11	119,0,136/c2	Fin-specific	no-mutants
ZNF142	-	-	-	-	0.89	0.21	0.94	0.32	0.33	1.13	119,0,136/c2	Fin-specific	no-mutants
LOC103179672	-	-	-	-	2.31	0.4	1.1	1.71	1.08	3.07	119,0,136/c2	Fin-specific	no-mutants
LOC102363031	-	-	-	-	1.82	2.42	1.46	1.39	1.43	0.48	119,0,136/c2	Fin-specific	no-mutants
LOC102346321	-	-	-	-	286.14	431.15	231.92	249.74	244.2	144.23	119,0,136/c2	Fin-specific	no-mutants
LOC107077478	-	-	-	-	6.19	8.95	6.09	4.61	4.47	2.35	119,0,136/c2	Fin-specific	no-mutants
ARMC3	0	0.03	0.03	0.02	0.94	1.39	0.95	0.63	0.74	0.41	119,0,136/c2	Fin-specific	no-mutants
ZBBX	0	0	0	0	0.91	1.08	0.77	0.35	0.62	0.29	119,0,136/c2	Fin-specific	no-mutants
LOC102573998	-	-	-	-	1.38	1.76	1.03	0.78	1.33	0.19	119,0,136/c2	Fin-specific	no-mutants
TDRD6	0	0	0.01	0	4.59	4.24	2.92	1.88	2.16	1.02	119,0,136/c2	Fin-specific	probably-unrelated
CPNE4	0.17	0.08	0.04	0.22	14.77	15.14	10.75	8.77	8.98	1.66	119,0,136/c2	Fin-specific	no-mutants
GPAT2	0.02	0.15	0.09	0.04	1.96	0.52	0.29	0.54	0.9	2.16	119,0,136/c2	Fin-specific	no-mutants
NAALADL1	0.1	0.03	0.06	0.13	1.24	1.49	0.48	0.31	0.67	0.49	119,0,136/c2	Fin-specific	no-mutants
FAM180A	0	0	0	0.03	1.52	1.57	1.02	0.57	0.71	0.27	119,0,136/c2	Fin-specific	no-mutants
LOC102357299	-	-	-	-	0.82	0.11	1.17	0.18	0.19	0.22	119,0,136/c2	Fin-specific	no-mutants
TRPM6	0.01	0.06	0.1	0.18	4.45	4.93	4.06	1.52	2.08	0.74	119,0,136/c2	Fin-specific	embryonic lethality during organogenesis, incomplete penetrance
LOC102560400	-	-	-	-	2.36	1.14	3.15	0.88	0.59	0.96	119,0,136/c2	Fin-specific	no-mutants
LOC103175319	-	-	-	-	0.94	1.1	0.59	0.75	0.48	0.05	119,0,136/c2	Fin-specific	no-mutants
LOC102359288	-	-	-	-	0.97	0.63	1.13	0.36	0.41	0.37	119,0,136/c2	Fin-specific	no-mutants
ARHGEF37	0.04	0.05	0.11	0.49	3.33	4.24	1.73	2.1	2.58	1.64	119,0,136/c2	Fin-specific	no-mutants
ZFP92	0.03	0.04	0.23	0.31	2.96	3.31	1.47	2.19	1.65	0.71	119,0,136/c2	Fin-specific	no-mutants
CDX2	0.21	0.07	0.04	0	7.86	8.32	6.66	3.88	4.31	2.04	119,0,136/c2	Fin-specific	embryonic lethality before implantation, complete penetrance,embryonic lethality, complete penetrance,embryonic lethality during organogenesis, complete penetrance,absent hindlimb buds,sirenomelia,embryonic lethality between implantation and somite formation, complete penetrance
PIWIL1	0	0.01	0	0	1.81	0.7	0.58	0.79	1.36	1.78	119,0,136/c2	Fin-specific	probably-unrelated
MARC1	0.33	0.05	0.06	0.05	4.12	4.12	3.09	1.81	1.13	1.55	119,0,136/c2	Fin-specific	no-mutants
DAW1	0	0.03	0	0	1.45	1.42	1.28	0.86	0.35	0.33	119,0,136/c2	Fin-specific	probably-unrelated
RERGL	0	0	0	0	2.93	2.81	1.94	1.35	1.64	0.48	119,0,136/c2	Fin-specific	no-mutants
KHDRBS2	0.1	0.65	0.23	0.61	3.77	3.34	2.15	2.06	1.74	0.95	119,0,136/c2	Fin-specific	probably-unrelated
LOC106702273	-	-	-	-	7.95	6.97	6.26	2.88	5.84	0.53	119,0,136/c2	Fin-specific	no-mutants
CUNH16ORF71	-	-	-	-	1.04	0.84	0.82	0.41	0.55	0.22	119,0,136/c2	Fin-specific	no-mutants
DDX43	0.04	0.06	0.11	0.11	3.68	2.94	2.86	1.77	1.76	0.87	119,0,136/c2	Fin-specific	no-mutants
ZFP385C	0.05	0.11	0.21	0.2	10.14	9.3	5.95	4.74	4.93	3.45	119,0,136/c2	Fin-specific	no-mutants
FBXO15	0.55	0.64	0.69	0.28	4.64	4.21	2.14	2.21	2.47	1.62	119,0,136/c2	Fin-specific	probably-unrelated
LOC102354150	-	-	-	-	1.02	0.86	0.31	0.55	0.76	0.3	119,0,136/c2	Fin-specific	no-mutants
IRF7	0.33	0.14	0.17	0.58	3.1	1.11	1.25	1.25	1.93	2.06	119,0,136/c2	Fin-specific	probably-unrelated
C12ORF56	-	-	-	-	1.99	1	0.77	0.42	0.53	1.8	119,0,136/c2	Fin-specific	no-mutants
LOC106702623	-	-	-	-	1.33	0.99	0.84	0.43	0.75	0.3	119,0,136/c2	Fin-specific	no-mutants
LOC102560730	-	-	-	-	6.6	4.27	4.47	3.49	3.05	2.12	119,0,136/c2	Fin-specific	no-mutants
LRRIQ3	0.18	0.3	0.21	0.16	4.15	3.27	2.13	2.1	1.71	1.71	119,0,136/c2	Fin-specific	no-mutants
ILDR2	0.6	0.73	0.39	0.29	5.64	4.81	2.88	2.7	3	1.43	119,0,136/c2	Fin-specific	probably-unrelated
LOC102363977	-	-	-	-	3.33	2.9	1.92	1.49	1.64	1.12	119,0,136/c2	Fin-specific	no-mutants
CCNO	0.05	0.02	0.04	0.08	1.13	0.79	0.85	0.69	0.27	0.41	119,0,136/c2	Fin-specific	probably-unrelated
LOC102348511	-	-	-	-	1.43	1.36	0.62	0.39	0.45	0.92	119,0,136/c2	Fin-specific	no-mutants
SLC26A9	0	0	0	0.01	11.19	8.62	5.8	5.14	6.58	2.81	119,0,136/c2	Fin-specific	probably-unrelated
LOC102364097	-	-	-	-	1.27	1.08	0.43	0.43	1.1	0.27	119,0,136/c2	Fin-specific	no-mutants
LOC102354474	-	-	-	-	1.92	1.73	0.78	0.81	1.11	0.92	119,0,136/c2	Fin-specific	no-mutants
LOC102574323	-	-	-	-	3.56	1.12	2.07	1.54	1.73	2.84	119,0,136/c2	Fin-specific	no-mutants
FAM19A3	0.08	0.06	0.29	0.44	1.69	1.35	1.13	1.14	0.68	0.39	119,0,136/c2	Fin-specific	probably-unrelated
LOC103181785	-	-	-	-	4.27	3.48	3.72	3.16	1.9	0.34	119,0,136/c2	Fin-specific	no-mutants
CCDC190	0	0.06	0.09	0.1	1.58	1.23	1.32	0.96	0.67	0.44	119,0,136/c2	Fin-specific	no-mutants
CELF6	0	0.06	0	0.07	1.46	1.17	0.99	0.87	0.94	0.26	119,0,136/c2	Fin-specific	probably-unrelated
LOC102355229	-	-	-	-	2.12	1.7	1.24	1.17	0.97	0.93	119,0,136/c2	Fin-specific	no-mutants
MOGAT1	0.27	0.29	0.47	0.16	4.42	2.86	3.79	2.04	1.96	2.09	119,0,136/c2	Fin-specific	probably-unrelated
LOC102357479	-	-	-	-	11.91	9.96	7.62	7.19	5.93	4.9	119,0,136/c2	Fin-specific	no-mutants
FCGBP	0.06	0.12	0.13	0.12	3.34	1.25	1.81	2.07	1.12	2.68	119,0,136/c2	Fin-specific	no-mutants
CCDC173	0.54	0.56	0.93	0.64	1.92	1.64	1.18	1.21	0.81	0.69	119,0,136/c2	Fin-specific	no-mutants
LRRC39	0.41	0.26	0.31	0.33	1.96	1.7	1.3	1.19	0.88	0.84	119,0,136/c2	Fin-specific	no-mutants
GM3325	-	-	-	-	3.64	1.35	2.4	1.43	1.13	3.08	119,0,136/c2	Fin-specific	no-mutants
CCDC87	0.01	0	0.04	0.07	1.01	0.87	0.53	0.73	0.44	0.26	119,0,136/c2	Fin-specific	no-mutants
FAM186A	-	-	-	-	1.55	1.34	0.82	0.9	0.69	0.54	119,0,136/c2	Fin-specific	no-mutants
ANO4	0.39	0.42	0.19	0.11	1.93	1.24	1.86	1.33	0.66	0.57	119,0,136/c2	Fin-specific	no-mutants
LOC112531750	-	-	-	-	91.88	79.7	50.67	48.85	54.98	28.33	119,0,136/c2	Fin-specific	no-mutants
LOC103187482	-	-	-	-	1.43	0.45	0.73	1.04	0.22	1.35	119,0,136/c2	Fin-specific	no-mutants
C7	0	0.01	0.02	0.05	3.42	2.43	3.57	2.36	1.2	1.16	119,0,136/c2	Fin-specific	no-mutants
QRICH2	0.61	0.27	0.11	0.22	6.24	5.33	5.53	3.46	2.52	1.32	119,0,136/c2	Fin-specific	no-mutants
LOC102354453	-	-	-	-	2.08	1.82	1.74	1.24	0.67	1.04	119,0,136/c2	Fin-specific	no-mutants
C20H20ORF112	-	-	-	-	2.25	2.06	1.37	0.89	1.47	0.8	119,0,136/c2	Fin-specific	no-mutants
LOC102362994	-	-	-	-	3.28	3.04	0.74	0.36	2.55	1.47	119,0,136/c2	Fin-specific	no-mutants
POU4F2	0	0	0	0	1.14	0.91	0.93	0.78	0.2	0.53	119,0,136/c2	Fin-specific	probably-unrelated
LOC102359668	-	-	-	-	1.05	0.75	0	0.61	0.54	1.15	119,0,136/c2	Fin-specific	no-mutants
LOC102565104	-	-	-	-	4.48	4.27	4.37	2.24	2.59	1.72	119,0,136/c2	Fin-specific	no-mutants
LOC102351833	-	-	-	-	8.35	8.13	5.72	4.76	5.61	4.45	119,0,136/c2	Fin-specific	no-mutants
LOC102363998	-	-	-	-	7.34	7.26	5.47	4.8	4.59	3.01	119,0,136/c2	Fin-specific	no-mutants
LOC102347408	-	-	-	-	1.06	0.94	1.15	0.41	0.5	0.41	119,0,136/c2	Fin-specific	no-mutants
LOC102355715	-	-	-	-	2.47	2.07	1.02	1.05	1.14	2.63	119,0,136/c2	Fin-specific	no-mutants
NSUN7	0	0.02	0.07	0.11	2.34	2.25	2	1.84	1.22	0.79	119,0,136/c2	Fin-specific	probably-unrelated
DDO	0.13	0.01	0.08	0.09	1.95	2.34	1.33	1.39	1.13	1.28	119,0,136/c2	Fin-specific	probably-unrelated
LOC107055438	-	-	-	-	456.44	440.67	294	277.74	281.18	184.41	119,0,136/c2	Fin-specific	no-mutants
LOC102686673	-	-	-	-	348.36	292.33	323.11	250.58	172	156.73	119,0,136/c2	Fin-specific	no-mutants
LOC102364495	-	-	-	-	6	5.71	2.06	3.34	1.98	6.96	119,0,136/c2	Fin-specific	no-mutants
NEIL2	0.47	0.43	0.6	0.81	5.88	6.47	5.86	3.64	3.37	2.19	119,0,136/c2	Fin-specific	probably-unrelated
DNAIC2	0.03	0.11	0.29	0.45	1.88	2.16	1.5	1.18	1.2	0.85	119,0,136/c2	Fin-specific	probably-unrelated
POTEG	0	0	0	0	3.72	4.21	1.96	1.39	3.61	1.42	119,0,136/c2	Fin-specific	no-mutants
PPP1R17	0.02	0	0.02	0.03	13.6	14.39	11.86	8.3	6.5	4.51	119,0,136/c2	Fin-specific	no-mutants
CLG26H11ORF88	-	-	-	-	14.08	15.48	15.78	7.82	5.99	3.6	119,0,136/c2	Fin-specific	no-mutants
LOC102347356	-	-	-	-	0.99	1.13	0.61	0.64	0.84	0.34	119,0,136/c2	Fin-specific	no-mutants
LOC102356923	-	-	-	-	1.48	1.43	1.6	0.72	0.72	0.4	119,0,136/c2	Fin-specific	no-mutants
CNGA4	0	0.01	0.05	0	2.25	2.47	2.2	1.08	0.37	1.2	119,0,136/c2	Fin-specific	probably-unrelated
LOC102365688	-	-	-	-	3.21	3.54	2.39	1.91	2.15	0.99	119,0,136/c2	Fin-specific	no-mutants
KCNG4	0	0.02	0.03	0.01	2.92	2.86	3.51	1.82	1.54	0.64	119,0,136/c2	Fin-specific	no-mutants
LOC102348990	-	-	-	-	14.34	5.06	9.5	8.35	6.62	13.76	119,0,136/c2	Fin-specific	no-mutants
LOC102356288	-	-	-	-	1.22	1.21	0.7	0.65	0.57	0.61	119,0,136/c2	Fin-specific	no-mutants
LOC109280443	-	-	-	-	1.94	1.91	0.67	0.92	0.73	1.53	119,0,136/c2	Fin-specific	no-mutants
GYS2	0	0	0	0	8.21	8.44	5.88	4.71	3.22	3.35	119,0,136/c2	Fin-specific	probably-unrelated
LOC102363928	-	-	-	-	1.8	1.18	0.5	0.51	1.37	1.43	119,0,136/c2	Fin-specific	no-mutants
RXFP1	0	0	0.02	0.06	1.87	1.35	1.76	1.25	0.86	0.82	119,0,136/c2	Fin-specific	probably-unrelated
LOC103173281	-	-	-	-	3.16	3.17	1.88	1.7	1.97	1.53	119,0,136/c2	Fin-specific	no-mutants
CABP4	0.02	0	0	0	4.28	4.02	3.66	3.24	1.4	1.59	119,0,136/c2	Fin-specific	probably-unrelated
LOC102356280	-	-	-	-	2.28	2.14	1.87	1.08	0.93	1.07	119,0,136/c2	Fin-specific	no-mutants
ZMYND10	0.09	0.16	0.1	0.33	3.82	3.61	2.99	2.37	1.82	1.39	119,0,136/c2	Fin-specific	probably-unrelated
LOC103180283	-	-	-	-	1.03	0.96	0.61	0.43	0.74	0.39	119,0,136/c2	Fin-specific	no-mutants
LOC102350653	-	-	-	-	1.61	1.13	1.41	0.9	0.75	0.65	119,0,136/c2	Fin-specific	no-mutants
EFCAB12	0.13	0.27	0.23	0.18	6.17	4.45	4.83	3	2.69	2.97	119,0,136/c2	Fin-specific	no-mutants
LOC103184164	-	-	-	-	10.34	8.23	8.1	4.66	5.57	4.66	119,0,136/c2	Fin-specific	no-mutants
LOC102350412	-	-	-	-	19.7	15.01	16.46	12.5	8.88	9	119,0,136/c2	Fin-specific	no-mutants
LOC107077613	-	-	-	-	1.12	1.01	0.64	0.52	0.66	0.6	119,0,136/c2	Fin-specific	no-mutants
DNAI1	-	-	-	-	3.62	2.98	2.3	1.44	2.67	1.71	119,0,136/c2	Fin-specific	no-mutants
LOC106701959	-	-	-	-	4.17	3.67	2.81	2.32	2.58	2.37	119,0,136/c2	Fin-specific	no-mutants
ADGRD1	0.01	0	0.01	0.03	36.93	22.64	21.25	18.72	14.33	32.43	119,0,136/c2	Fin-specific	probably-unrelated
LOC103173332	-	-	-	-	3.45	3.95	1.6	2.39	1.1	3.19	119,0,136/c2	Fin-specific	no-mutants
IAPP	0.05	0.05	0	0.07	1.83	1.36	1.03	0.6	0.92	1.66	119,0,136/c2	Fin-specific	probably-unrelated
LOC102356862	-	-	-	-	1.97	1.25	0.86	1.06	0.87	1.65	119,0,136/c2	Fin-specific	no-mutants
KITLG	-	-	-	-	2.35	2.11	1.76	1.43	1.04	1.27	119,0,136/c2	Fin-specific	no-mutants
LOC103180176	-	-	-	-	3.41	2.8	2.56	2.16	2.14	1.83	119,0,136/c2	Fin-specific	no-mutants
CUNH11ORF74	-	-	-	-	1.89	1.69	1.35	1.14	1.03	1.29	119,0,136/c2	Fin-specific	no-mutants
MINDY4	-	-	-	-	4.86	3.37	3.93	3.14	3.07	2.67	119,0,136/c2	Fin-specific	no-mutants
REXO5	-	-	-	-	8.13	6.41	5.23	5.21	5.74	4.17	119,0,136/c2	Fin-specific	no-mutants
LOC102363991	-	-	-	-	42.03	20.12	30.16	32.38	22.56	30.39	119,0,136/c2	Fin-specific	no-mutants
ERICH3	0	0	0.09	0.19	8.43	6.09	7.75	5.97	4.77	4.63	119,0,136/c2	Fin-specific	no-mutants
HSD17B2	0.16	0	0.1	0	4.56	3.09	3.6	2.43	3.69	2.18	119,0,136/c2	Fin-specific	embryonic lethality during organogenesis, incomplete penetrance
SERPINE3	0	0	0	0	1.02	0.75	0.72	0.41	0.47	0.85	119,0,136/c2	Fin-specific	no-mutants
LOC106705253	-	-	-	-	10.64	6.66	6.16	6.5	4.96	9.45	119,0,136/c2	Fin-specific	no-mutants
LOC102566961	-	-	-	-	1.66	0.87	1.09	1.04	1	1.47	119,0,136/c2	Fin-specific	no-mutants
LOC102356241	-	-	-	-	12.43	8.3	8.22	7.59	10.69	4.6	119,0,136/c2	Fin-specific	no-mutants
LOC102350406	-	-	-	-	380.91	190.16	258.41	228.58	206.24	315.9	119,0,136/c2	Fin-specific	no-mutants
LOC102572765	-	-	-	-	10.78	8.81	6.56	6.22	7.21	6.16	119,0,136/c2	Fin-specific	no-mutants
LOC102350929	-	-	-	-	8.14	4.86	4.87	5.18	4.21	6.67	119,0,136/c2	Fin-specific	no-mutants
LOC103190394	-	-	-	-	2.25	1.12	1.54	2.13	0.49	1.74	119,0,136/c2	Fin-specific	no-mutants
DMBX1	0.01	0.02	0.27	0.1	1.08	0.89	0.73	0.93	0.58	0.51	119,0,136/c2	Fin-specific	probably-unrelated
AXDND1	-	-	-	-	1.37	1.19	0.84	0.77	0.99	0.74	119,0,136/c2	Fin-specific	no-mutants
LOC102350085	-	-	-	-	1.53	1.51	0.85	0.83	0.85	1.19	119,0,136/c2	Fin-specific	no-mutants
ACOT3	0.03	0	0.03	0.06	22.37	20.22	17.12	13.08	12.55	12.74	119,0,136/c2	Fin-specific	no-mutants
OPN1MW	0	0	0	0	1.75	0.78	1.58	1.33	1.29	0.6	119,0,136/c2	Fin-specific	probably-unrelated
LOC102565856	-	-	-	-	4.83	2.69	3.56	2.56	1.83	4.08	119,0,136/c2	Fin-specific	no-mutants
LOC102347130	-	-	-	-	1.17	0.99	0.72	0.75	0.83	0.42	119,0,136/c2	Fin-specific	no-mutants
POT1	-	-	-	-	8.6	6.73	6.71	4.99	5.4	4.44	119,0,136/c2	Fin-specific	no-mutants
UCP1	0	0	0	0	3.79	2.98	1.98	1.91	2.62	2.41	119,0,136/c2	Fin-specific	probably-unrelated
LOC103184163	-	-	-	-	10.16	7.81	6.65	5.4	4.67	6.97	119,0,136/c2	Fin-specific	no-mutants
LOC102347819	-	-	-	-	4.3	3.28	2.52	1.87	2.2	3.01	119,0,136/c2	Fin-specific	no-mutants
4930562C15RIK	0	0	0.01	0	2.11	1.17	1.17	1.05	1.19	1.73	119,0,136/c2	Fin-specific	no-mutants
NALCN	0	0.02	0.1	0.65	5.89	4.95	2.53	2.31	4.27	4.11	119,0,136/c2	Fin-specific	probably-unrelated
GDAP1	0.12	0.31	0.12	0.21	3.95	3.25	2.32	2.82	2.09	1.88	119,0,136/c2	Fin-specific	abnormal autopod morphology
CACNA1E	0.01	0.02	0.05	0.18	2.41	1.27	1.19	1.56	1.21	1.91	119,0,136/c2	Fin-specific	probably-unrelated
KIF27	0.15	0.18	0.38	0.57	3.86	2.52	2.53	2.5	2.27	2.32	119,0,136/c2	Fin-specific	probably-unrelated
LOC103173085	-	-	-	-	9.25	6.39	5.93	6.46	5.49	6.19	119,0,136/c2	Fin-specific	no-mutants
LOC102352053	-	-	-	-	18.04	12.55	11.59	11.32	12.22	10.05	119,0,136/c2	Fin-specific	no-mutants
ZNF462	-	-	-	-	41.31	29.53	31.5	26.82	26.36	22.8	119,0,136/c2	Fin-specific	no-mutants
PIP4P2	-	-	-	-	13.34	9.81	9.16	8.1	7.9	9.21	119,0,136/c2	Fin-specific	no-mutants
LOC102353791	-	-	-	-	17.89	10.25	12.83	13.31	10.04	12.44	119,0,136/c2	Fin-specific	no-mutants
MAP7D2	0.68	0.48	0.5	0.59	5.19	3.56	3.28	3.79	3.17	2.98	119,0,136/c2	Fin-specific	probably-unrelated
ELP1	-	-	-	-	15.7	11.64	11.09	9.37	10.01	9.67	119,0,136/c2	Fin-specific	abnormal autopod morphology,embryonic lethality during organogenesis, complete penetrance
ANKS1B	0	0.01	0.11	0.18	40.9	24.84	26.49	26.93	22.34	29.88	119,0,136/c2	Fin-specific	probably-unrelated
ZNF132	-	-	-	-	9.68	5.57	7.28	6.02	5.33	6.42	119,0,136/c2	Fin-specific	no-mutants
LOC102560849	-	-	-	-	4.23	2.98	2.59	2.38	3.04	2.61	119,0,136/c2	Fin-specific	no-mutants
HSH2D	0	0	0	0.08	37.92	24.31	27.09	21.95	25.31	17.16	119,0,136/c2	Fin-specific	probably-unrelated
LOC102568430	-	-	-	-	2.94	2.48	1.99	1.75	1.67	1.47	119,0,136/c2	Fin-specific	no-mutants
TTC29	0	0	0.02	0	2.34	1.62	1.46	1.76	1.32	0.94	119,0,136/c2	Fin-specific	no-mutants
LOC102357529	-	-	-	-	1.47	1.09	0.64	1.18	0.89	0.63	119,0,136/c2	Fin-specific	no-mutants
SPATA4	0	0	0	0	8.24	6.35	5.65	4.35	5.01	4.13	119,0,136/c2	Fin-specific	probably-unrelated
LOC102355908	-	-	-	-	16.87	9.09	10.18	12.09	9.24	11.2	119,0,136/c2	Fin-specific	no-mutants
RIMS1	0.18	0.15	0.3	0.53	3.11	1.55	1.91	1.89	1.81	2.32	119,0,136/c2	Fin-specific	probably-unrelated
LOC106737022	-	-	-	-	6.57	5.37	3.89	4.13	4.41	3.58	119,0,136/c2	Fin-specific	no-mutants
HTD2	-	-	-	-	18.93	15.55	12.92	10.79	11.67	9.47	119,0,136/c2	Fin-specific	no-mutants
SLC22A31	-	-	-	-	2.25	1.68	1.71	1.35	1.12	1.3	119,0,136/c2	Fin-specific	no-mutants
UGT2A2	0	0	0	0	3.62	2.75	2.12	2.34	2.23	1.66	119,0,136/c2	Fin-specific	no-mutants
BICD1	0.39	0.27	0.52	0.59	1.21	0.78	0.58	0.98	0.66	0.64	119,0,136/c2	Fin-specific	probably-unrelated
AJM1	-	-	-	-	1.22	0.63	1.05	0.75	0.47	0.77	119,0,136/c2	Fin-specific	no-mutants
LDHD	0.07	0	0.1	0.02	33.9	26.67	21.91	22.98	16.66	22.26	119,0,136/c2	Fin-specific	no-mutants
OXTR	0.02	0.03	0.39	0.46	1.97	1.4	1.32	1.52	0.87	1.24	119,0,136/c2	Fin-specific	probably-unrelated
ADA2	-	-	-	-	17.51	12.28	10.48	9.36	11.2	10.36	119,0,136/c2	Fin-specific	no-mutants
SUPT20H	-	-	-	-	31.71	21.86	19.37	15.05	19.67	20.16	119,0,136/c2	Fin-specific	no-mutants
TEDC2	-	-	-	-	25.97	16.99	17.87	16.07	16.35	12.74	119,0,136/c2	Fin-specific	no-mutants
KHDC4	-	-	-	-	38.42	26.92	23.41	22.25	20.87	20.89	119,0,136/c2	Fin-specific	no-mutants
OTUD7A	0.06	0.05	0.06	0.11	5.42	3.91	3.23	3.1	3.35	2.78	119,0,136/c2	Fin-specific	probably-unrelated
LRRC6	0.05	0.04	0.02	0	2.25	1.47	1.63	1.41	1.24	1.18	119,0,136/c2	Fin-specific	no-mutants
LOC102349744	-	-	-	-	8.54	5.41	5.87	4.62	4.54	4.82	119,0,136/c2	Fin-specific	no-mutants
DCAF1	-	-	-	-	19.83	11.24	12.85	13.06	12.72	10.81	119,0,136/c2	Fin-specific	embryonic lethality before implantation,embryonic lethality, complete penetrance
ZNF638	-	-	-	-	67.33	37.35	43.02	41.32	39.58	41.92	119,0,136/c2	Fin-specific	no-mutants
TASOR2	-	-	-	-	6.26	3.91	4.52	4.05	3.03	3.99	119,0,136/c2	Fin-specific	no-mutants
CYBC1	-	-	-	-	21.83	16.79	13.58	12.26	13.44	11.49	119,0,136/c2	Fin-specific	probably-unrelated
LOC102357343	-	-	-	-	8.29	5.56	4.87	4.38	5.91	3.98	119,0,136/c2	Fin-specific	no-mutants
LOC103173065	-	-	-	-	1.25	0.79	0.91	0.87	0.69	0.57	119,0,136/c2	Fin-specific	no-mutants
DBF4B	-	-	-	-	12.81	9.96	7.74	7.32	7.54	6.22	119,0,136/c2	Fin-specific	no-mutants
LOC102346064	-	-	-	-	3.91	1.88	2.66	2.93	1.84	2.15	119,0,136/c2	Fin-specific	no-mutants
MLA3A	-	-	-	-	6.02	3.84	3.41	3.28	3.82	3.44	119,0,136/c2	Fin-specific	no-mutants
LOC106705111	-	-	-	-	27.53	18.43	15.43	15.3	16.01	15.54	119,0,136/c2	Fin-specific	no-mutants
FAM161A	0.22	0.12	0.58	0.75	3	2.04	1.83	1.82	1.8	1.41	119,0,136/c2	Fin-specific	probably-unrelated
LOC107076591	-	-	-	-	1.2	0.8	0.9	0.69	0.63	0.52	119,0,136/c2	Fin-specific	no-mutants
OPN4	0	0	0	0.09	2.59	1.81	1.25	1.06	1.54	1.39	119,0,136/c2	Fin-specific	probably-unrelated
LOC102349566	-	-	-	-	25.15	19.34	15.91	15.89	14.29	9.05	119,0,136/c2	Fin-specific	no-mutants
RAPGEF4	0.47	0.68	0.46	0.62	5.11	3.48	1.68	2.33	2.8	3.39	119,0,136/c2	Fin-specific	probably-unrelated
LAT2	0.24	0.38	0.33	0.66	1.7	1.16	1.24	0.96	0.98	0.58	119,0,136/c2	Fin-specific	probably-unrelated
LOC102363151	-	-	-	-	2.49	1.64	1.59	2.22	1.14	0.94	119,0,136/c2	Fin-specific	no-mutants
TMEM63C	0.01	0	0.02	0.17	1.52	0.82	1.11	0.94	1.04	0.42	119,0,136/c2	Fin-specific	no-mutants
FSHR	0	0	0	0.02	6.59	4.3	4.85	4.02	3.37	2.76	119,0,136/c2	Fin-specific	abnormal femur morphology
NFKBIZ	0.63	0.3	0.81	0.82	5.85	4.25	4.39	3.14	3.64	2.53	119,0,136/c2	Fin-specific	probably-unrelated
WEE2	0.07	0.1	0	0.02	2.09	1.39	1.59	1.18	0.92	1.19	119,0,136/c2	Fin-specific	probably-unrelated
LOC103182082	-	-	-	-	2.01	0.9	0.34	1.55	1.67	1.04	119,0,136/c2	Fin-specific	no-mutants
LOC102348487	-	-	-	-	12.93	9.14	10.17	8.45	7.33	5.48	119,0,136/c2	Fin-specific	no-mutants
RHBDL2	0.24	0.06	0.32	0.33	2.95	2.41	1.21	1.4	2.1	1.94	119,0,136/c2	Fin-specific	no-mutants
DNALI1	0	0.02	0.02	0	4.58	3.53	2.77	2.94	2.31	2.7	119,0,136/c2	Fin-specific	no-mutants
KIF17	0	0.09	0.24	0.32	3.97	2.86	2.57	2.31	2.17	1.73	119,0,136/c2	Fin-specific	probably-unrelated
KAT14	-	-	-	-	24.69	17.65	15.63	14.38	14.24	11.34	119,0,136/c2	Fin-specific	embryonic lethality, complete penetrance
LOC102354107	-	-	-	-	1.34	0.53	0.98	0.88	0.7	0.65	119,0,136/c2	Fin-specific	no-mutants
TP53BP1	-	-	-	-	14.67	7.67	8.85	8.06	7.27	9.23	119,0,136/c2	Fin-specific	no-mutants
CDH20	0.31	0.06	0.11	0.14	3.55	1.39	1.62	1.99	2.87	1.95	119,0,136/c2	Fin-specific	no-mutants
LRRC3C	0	0	0	0	4.02	2.33	2.46	1.83	2.54	2.09	119,0,136/c2	Fin-specific	no-mutants
TRIM17	0	0	0.1	0.63	37.95	28.06	25.27	22.53	17.46	21.23	119,0,136/c2	Fin-specific	no-mutants
SAMD15	0.08	0.1	0.08	0.24	41.91	25.72	28.48	23.42	23.27	18.48	119,0,136/c2	Fin-specific	no-mutants
4930430A15RIK	0	0	0	0	1.82	0.5	1.44	1.44	0.67	1.04	119,0,136/c2	Fin-specific	no-mutants
ITGAX	0.01	0	0.05	0.02	1.93	1.11	1.36	1.18	1.04	0.73	119,0,136/c2	Fin-specific	probably-unrelated
CA14	-	-	-	-	3.88	2.22	2.62	2.67	1.57	1.88	119,0,136/c2	Fin-specific	no-mutants
ATP10D	-	-	-	-	9.09	5.49	5.7	4.85	5.56	4.49	119,0,136/c2	Fin-specific	no-mutants
LOC102349362	-	-	-	-	36.27	20.06	22.07	21.96	19.83	19.44	119,0,136/c2	Fin-specific	no-mutants
SLITRK3	0	0.01	0.09	0.64	1.78	1.02	1.3	1.21	0.97	0.81	119,0,136/c2	Fin-specific	probably-unrelated
PP2D1	0.04	0.04	0.05	0.12	1.73	1.03	0.96	0.95	1.16	0.86	119,0,136/c2	Fin-specific	no-mutants
MARCO	0	0	0.02	0.1	95.52	38.44	42.67	59.24	70.36	47.55	119,0,136/c2	Fin-specific	probably-unrelated
LOC102365715	-	-	-	-	4.6	3	2.61	2.6	3.02	1.97	119,0,136/c2	Fin-specific	no-mutants
SARM1	0.13	0.46	0.55	0.82	16.41	7.96	10.77	10.55	8.48	7.84	119,0,136/c2	Fin-specific	probably-unrelated
LOC103187855	-	-	-	-	11.05	6.7	5.83	6.72	6.8	4.88	119,0,136/c2	Fin-specific	no-mutants
LOC106703254	-	-	-	-	6.01	3.09	3.52	3.52	3.7	2.87	119,0,136/c2	Fin-specific	no-mutants
LOC102346973	-	-	-	-	4.15	2.96	2.14	2.24	2.59	1.79	119,0,136/c2	Fin-specific	no-mutants
LOC102346856	-	-	-	-	59.81	32.92	34.36	28.4	29.01	35.49	119,0,136/c2	Fin-specific	no-mutants
LOC102365920	-	-	-	-	7.9	5.18	3.51	4.19	5.86	2.75	119,0,136/c2	Fin-specific	no-mutants
LOC420992	-	-	-	-	8.56	5.73	4.84	3.79	5.35	3.66	119,0,136/c2	Fin-specific	no-mutants
LOC103186336	-	-	-	-	1.05	0.61	0.33	0.67	0.76	0.34	119,0,136/c2	Fin-specific	no-mutants
LOC102355507	-	-	-	-	1.05	0.6	0.59	0.62	0.34	0.52	119,0,136/c2	Fin-specific	no-mutants
NRSN1	0.46	0.55	0.39	0.82	4.87	2.44	2.01	2.58	2.44	2.72	119,0,136/c2	Fin-specific	probably-unrelated
LOC102363115	-	-	-	-	12.26	7.95	6.99	5.99	7.07	5.51	119,0,136/c2	Fin-specific	no-mutants
CENPC	-	-	-	-	16.55	9.25	7.62	9.2	10.11	6.48	119,0,136/c2	Fin-specific	no-mutants
LOC102576796	-	-	-	-	7.2	2.94	4.51	4.41	3.27	3.42	119,0,136/c2	Fin-specific	no-mutants
LOC102352539	-	-	-	-	19.52	9.61	9.43	11.59	12.44	11.5	119,0,136/c2	Fin-specific	no-mutants
TECTA	0	0.03	0.07	0.08	7.3	4.64	3.49	3.84	4.12	3.25	119,0,136/c2	Fin-specific	probably-unrelated
LOC102357999	-	-	-	-	8.23	3.9	3.72	4.26	5.41	3.6	119,0,136/c2	Fin-specific	no-mutants
SGO1	-	-	-	-	26.18	15.23	14.65	14.15	14.92	10.52	119,0,136/c2	Fin-specific	probably-unrelated
TCP11	0.13	0.29	0.59	0.7	29.17	16.17	16.58	12.82	13.61	14.32	119,0,136/c2	Fin-specific	probably-unrelated
LOC102362853	-	-	-	-	3.52	1.68	1.7	1.84	1.9	2.23	119,0,136/c2	Fin-specific	no-mutants
CPLANE1	-	-	-	-	8.8	4.72	4.16	4.54	4.93	4.42	119,0,136/c2	Fin-specific	polydactyly,preaxial polydactyly
LOC102363940	-	-	-	-	12.56	6.51	6.91	6.81	7.03	4.92	119,0,136/c2	Fin-specific	no-mutants
LOC102574147	-	-	-	-	5.81	3.7	3.62	2.58	3	2.61	119,0,136/c2	Fin-specific	no-mutants
LOC102367617	-	-	-	-	48.03	27.47	23.85	23.73	20.66	26.05	119,0,136/c2	Fin-specific	no-mutants
BCLAF3	-	-	-	-	29.63	20.48	16.39	14.99	16.59	12.64	119,0,136/c2	Fin-specific	probably-unrelated
RSPH4A	0.01	0	0.03	0.04	3.44	2.15	2.1	1.64	1.47	1.81	119,0,136/c2	Fin-specific	no-mutants
RSPH6A	0	0.02	0	0	4.45	2.83	2.69	2.38	1.54	2.64	119,0,136/c2	Fin-specific	no-mutants
IQUB	0.01	0	0.02	0.01	1.36	0.84	0.61	0.65	0.69	0.54	119,0,136/c2	Fin-specific	probably-unrelated
RASGRF2	0.03	0.03	0	0.01	2.19	0.7	1.34	1.09	0.95	1.5	119,0,136/c2	Fin-specific	probably-unrelated
C1ORF112	-	-	-	-	3.62	2.69	2.43	2.13	1.5	1.69	119,0,136/c2	Fin-specific	no-mutants
LOC102357090	-	-	-	-	6.87	5.57	3.62	4.36	2.73	3.67	119,0,136/c2	Fin-specific	no-mutants
BHMT	0.08	0	0.06	0.05	1.5	1.21	0.39	0.65	0.81	0.96	119,0,136/c2	Fin-specific	probably-unrelated
DZANK1	0.09	0.2	0.34	0.5	1.94	1.35	1.38	1.11	0.92	0.59	119,0,136/c2	Fin-specific	probably-unrelated
SINHCAF	-	-	-	-	33	23.41	20.46	16.93	14.84	12.99	119,0,136/c2	Fin-specific	no-mutants
LOC102367273	-	-	-	-	1.38	1.07	0.77	0.74	0.51	0.53	119,0,136/c2	Fin-specific	no-mutants
TNXB	0.01	0.01	0.02	0.02	437.67	312.82	287.2	262.01	212.29	152.69	119,0,136/c2	Fin-specific	probably-unrelated
LOC106706111	-	-	-	-	5.36	3.79	3.86	3.9	2.44	1.12	119,0,136/c2	Fin-specific	no-mutants
SSU2	0.47	0.53	0.85	0.6	2.26	1.29	1.01	1.03	0.63	1.79	119,0,136/c2	Fin-specific	probably-unrelated
TLNRD1	-	-	-	-	10.57	3.21	5.69	4.99	4.84	6.83	119,0,136/c2	Fin-specific	no-mutants
HEATR4	-	-	-	-	3.01	2.28	1.41	1.27	1.71	1.44	119,0,136/c2	Fin-specific	no-mutants
LOC102360860	-	-	-	-	22.71	16.1	10.72	13.74	8.96	14.76	119,0,136/c2	Fin-specific	no-mutants
6820408C15RIK	0.53	0.18	0.37	0.29	6.41	3.98	4.1	3.52	3.87	2.36	119,0,136/c2	Fin-specific	no-mutants
LOC102366908	-	-	-	-	7.91	5.21	4.28	5.73	2.79	3.38	119,0,136/c2	Fin-specific	no-mutants
LAMC3	0.02	0.08	0.11	0.15	6.78	3.53	3.67	3.46	2.95	4.57	119,0,136/c2	Fin-specific	probably-unrelated
PNPLA3	0.01	0	0.01	0	3.52	2.45	1.81	2.76	1.53	1.11	119,0,136/c2	Fin-specific	no-mutants
ZNF256	-	-	-	-	5.03	2.61	2.18	2.72	2.08	3.66	119,0,136/c2	Fin-specific	no-mutants
LOC102355555	-	-	-	-	4.06	2.69	2.16	2.3	1.24	1.82	119,0,136/c2	Fin-specific	no-mutants
CCDC96	0.32	0.6	0.4	0.27	5.82	3.24	2.52	2.32	2.04	4.15	119,0,136/c2	Fin-specific	no-mutants
LOC102361110	-	-	-	-	4.93	3.58	2.81	2	2.65	1.75	119,0,136/c2	Fin-specific	no-mutants
MAP7D3	0.46	0.25	0.46	0.87	58.77	38.43	27.57	30.48	29.04	26.35	119,0,136/c2	Fin-specific	no-mutants
TRPV5	0	0	0	0	2.27	1.39	1.05	1.13	0.9	1.32	119,0,136/c2	Fin-specific	probably-unrelated
LOC102366812	-	-	-	-	1	0.57	0.54	0.58	0.29	0.63	119,0,136/c2	Fin-specific	no-mutants
FGL1	0.59	0.5	0.66	0.49	12.26	5.94	5.92	5.89	6.47	7.08	119,0,136/c2	Fin-specific	probably-unrelated
LOC102565203	-	-	-	-	2.24	0.98	1.14	0.85	0.66	1.19	119,0,136/c2	Fin-specific	no-mutants
CHRNB4	0.41	0.5	0.2	0.11	1.49	0.78	0.45	0.34	0.89	0.8	119,0,136/c2	Fin-specific	probably-unrelated
LOC106706822	-	-	-	-	4.82	2.74	3.06	2.39	2.5	1.14	119,0,136/c2	Fin-specific	no-mutants
LOC103189974	-	-	-	-	20.28	8.87	9.63	7.51	8.3	9.16	119,0,136/c2	Fin-specific	no-mutants
LOC103172338	-	-	-	-	9.79	5.03	5.74	4.76	5.23	3.25	119,0,136/c2	Fin-specific	no-mutants
LOC103182153	-	-	-	-	3.51	2.41	1.76	1.11	1.18	1.95	119,0,136/c2	Fin-specific	no-mutants
SLC22A26	0	0	0	0	1.61	0.68	0	1.43	0	1.33	119,0,136/c2	Fin-specific	no-mutants
KIAA1210	-	-	-	-	18.33	10.36	8.09	8.45	6.56	9.12	119,0,136/c2	Fin-specific	no-mutants
KCNJ9	0	0	0.01	0.01	13.35	5.43	7.08	5.93	4.06	5.88	119,0,136/c2	Fin-specific	probably-unrelated
BC030499	0.04	0	0.01	0.01	3.56	2.16	1.36	1.11	1.86	1.37	119,0,136/c2	Fin-specific	no-mutants
MOXD2	0	0	0.02	0	2.25	0.59	0.72	1.07	0.16	1.82	119,0,136/c2	Fin-specific	no-mutants
ATP4A	0.05	0.05	0.05	0.05	1.78	1	0.43	0.61	0.88	0.58	119,0,136/c2	Fin-specific	probably-unrelated
LOC103173744	-	-	-	-	7.2	2.5	3.08	3.62	4.04	2.69	119,0,136/c2	Fin-specific	no-mutants
SPDYA	0.12	0.25	0.5	0.41	4.44	2.33	1.56	1.43	2.58	1.53	119,0,136/c2	Fin-specific	probably-unrelated
BOD1L1	-	-	-	-	9.22	4.45	2.81	3.76	5.34	3.57	119,0,136/c2	Fin-specific	no-mutants
LOC102361617	-	-	-	-	4.42	1.62	2.03	1.85	2.16	1.98	119,0,136/c2	Fin-specific	no-mutants
LOC102352461	-	-	-	-	5.88	2.12	1.77	2.11	2.83	2.74	119,0,136/c2	Fin-specific	no-mutants
LOC102354605	-	-	-	-	15.13	6.97	7.11	7.91	6.5	7.23	119,0,136/c2	Fin-specific	no-mutants
MMP21	0	0	0	0	4.68	1.49	2.02	2.16	1.79	2.53	119,0,136/c2	Fin-specific	probably-unrelated
LOC103173087	-	-	-	-	6.38	3.3	3.32	2.95	3.62	2.14	119,0,136/c2	Fin-specific	no-mutants
BICRAL	-	-	-	-	5.24	3.34	2.53	2.42	2.73	1.92	119,0,136/c2	Fin-specific	embryonic lethality during organogenesis, complete penetrance
LOC102352248	-	-	-	-	23.54	13.34	11.23	11.82	13.71	6.72	119,0,136/c2	Fin-specific	no-mutants
LOC414835	-	-	-	-	6.22	3.75	3.54	3.07	2.92	2.6	119,0,136/c2	Fin-specific	no-mutants
XNTRPC	0.31	0.14	0.42	0.52	2.1	0.46	1.16	1.39	0.62	0.95	119,0,136/c2	Fin-specific	no-mutants
LOC102360923	-	-	-	-	9.46	3.79	4.67	4.66	3.52	5.37	119,0,136/c2	Fin-specific	no-mutants
LOC102350109	-	-	-	-	5.17	3.43	2.77	2.57	2.47	2	119,0,136/c2	Fin-specific	no-mutants
LOC102358143	-	-	-	-	1.25	0.78	0.82	0.49	0.89	0.25	119,0,136/c2	Fin-specific	no-mutants
NPC1L1	0.01	0.03	0.03	0.01	1.41	0.86	0.56	1.17	0.39	0.5	119,0,136/c2	Fin-specific	probably-unrelated
CFAP53	0.12	0.04	0.13	0.33	2.63	1.64	1.47	1.07	1.12	1.26	119,0,136/c2	Fin-specific	probably-unrelated
LOC102347858	-	-	-	-	5.35	3.41	2.71	2.33	2.97	1.86	119,0,136/c2	Fin-specific	no-mutants
TRIM66	0	0.01	0.01	0.01	44.53	18.09	22.61	21.19	20.95	24.1	119,0,136/c2	Fin-specific	probably-unrelated
LOC420294	-	-	-	-	14.85	7.98	8.74	7.63	6.43	6.97	119,0,136/c2	Fin-specific	no-mutants
LOC103189941	-	-	-	-	1.16	0.8	0.25	0.9	0.38	0.28	119,0,136/c2	Fin-specific	no-mutants
LOC106705849	-	-	-	-	6.11	3.95	2.25	3.3	2.97	1.62	119,0,136/c2	Fin-specific	no-mutants
BBOF1	0.06	0.07	0.22	0.37	1.6	0.97	0.29	0.41	1.27	0.43	119,0,136/c2	Fin-specific	no-mutants
CDH12	0.01	0.03	0.19	0.43	8.84	4.49	6	2.95	4.35	3.4	119,0,136/c2	Fin-specific	no-mutants
FBXO24	0.27	0.32	0.16	0.02	2.49	1.11	1.03	0.87	0.35	1.59	119,0,136/c2	Fin-specific	no-mutants
LOC102346262	-	-	-	-	1.51	0.76	1.03	0.96	0.46	0.39	119,0,136/c2	Fin-specific	no-mutants
XRRA1	0.07	0.11	0.17	0.15	2.26	1.21	1.38	1.13	0.9	0.7	119,0,136/c2	Fin-specific	no-mutants
CDH18	0.03	0.06	0.12	0.35	12.27	7.35	6.22	5.7	4.3	4.72	119,0,136/c2	Fin-specific	no-mutants
SLC12A1	0	0	0	0.01	4.82	1.54	3.24	2.41	1.77	1.19	119,0,136/c2	Fin-specific	probably-unrelated
CACNA1F	0	0	0.01	0.01	3.39	1.24	0.75	0.97	0.81	2.25	119,0,136/c2	Fin-specific	probably-unrelated
PTPRN2	0.1	0.1	0.1	0.06	13.17	6.93	6.35	5.67	4.53	5	119,0,136/c2	Fin-specific	probably-unrelated
SPEF2	0.08	0.14	0.09	0.03	2.66	1.51	1.47	1.26	1.15	0.42	119,0,136/c2	Fin-specific	probably-unrelated
TASOR	-	-	-	-	6.15	4.41	2.86	2.68	2.37	2.38	119,0,136/c2	Fin-specific	no-mutants
CELSR3	0.03	0.02	0.02	0.01	13.19	7.59	7.5	6.25	5.79	2.85	119,0,136/c2	Fin-specific	probably-unrelated
LOC102367281	-	-	-	-	2.56	1.4	1.47	1.1	0.89	0.92	119,0,136/c2	Fin-specific	no-mutants
C2	0.08	0.01	0.05	0.37	1.02	0.51	0.54	0.37	0.49	0.28	119,0,136/c2	Fin-specific	no-mutants
LOC102366391	-	-	-	-	3.14	2.21	0.97	0.96	0.27	1.94	119,0,136/c2	Fin-specific	no-mutants
SCNN1G	0	0.05	0.04	0.11	1.28	0.5	0.38	0.43	0.76	0.82	119,0,136/c2	Fin-specific	probably-unrelated
GALNT17	-	-	-	-	3.16	1.76	1.27	0.93	0.98	2.23	119,0,136/c2	Fin-specific	probably-unrelated
MYCBPAP	0.16	0.23	0.94	0.75	6.71	4.52	4.04	3.34	3.49	2.06	119,0,136/c2	Fin-specific	no-mutants
JHY	0	0.08	0.09	0.13	1.47	1.13	0.59	0.6	0.7	0.48	119,0,136/c2	Fin-specific	probably-unrelated
MARCH10	0	0	0.03	0.03	1.04	0.33	0.79	0.44	0.27	0.48	119,0,136/c2	Fin-specific	no-mutants
LOC102365890	-	-	-	-	6.44	4.15	4.13	3.59	2.6	1.35	119,0,136/c2	Fin-specific	no-mutants
KCNG3	0	0.03	0	0	20.12	12.94	15.34	8.52	8.75	5.62	119,0,136/c2	Fin-specific	no-mutants
CFAP70	0.04	0.07	0.05	0.09	2.68	1.98	1.5	1.39	1.15	0.87	119,0,136/c2	Fin-specific	no-mutants
AK8	0.27	0.37	0.3	0.59	2.24	1.57	1.35	1.2	1.19	0.43	119,0,136/c2	Fin-specific	probably-unrelated
LOC102354709	-	-	-	-	4.03	2.96	2.11	1.68	1.38	1.72	119,0,136/c2	Fin-specific	no-mutants
CCDC13	0.06	0.15	0.27	0.29	3.59	2.58	1.53	1.51	1.67	1.29	119,0,136/c2	Fin-specific	no-mutants
DNAH9	0.01	0	0.01	0.03	6.31	4.17	3.64	3.11	2.87	1.37	119,0,136/c2	Fin-specific	no-mutants
C2CD4C	0.09	0.12	0.21	0.26	1.12	0.52	0.89	0.51	0.29	0.45	119,0,136/c2	Fin-specific	probably-unrelated
SCD5	-	-	-	-	4.08	2.55	2.62	2.11	1.78	0.93	119,0,136/c2	Fin-specific	no-mutants
LOC102346638	-	-	-	-	1.6	0.95	0.89	0.9	0.63	0.41	119,0,136/c2	Fin-specific	no-mutants
CYCT	0.38	0.18	0	0.08	62.52	93.46	80.88	72.61	81.58	61.55	131,0,154/c3	Fin-specific	probably-unrelated
SLC26A5	0	0.02	0.04	0.01	1.5	1.87	1.6	1.31	2.07	1.31	131,0,154/c3	Fin-specific	probably-unrelated
KCNJ3	0.01	0.01	0.04	0.19	1.19	0.63	0.79	1.13	1.08	1.53	131,0,154/c3	Fin-specific	probably-unrelated
CFAP206	0.02	0.07	0.07	0.14	0.64	1.11	0.65	1	0.96	0.73	131,0,154/c3	Fin-specific	no-mutants
LOC102354732	-	-	-	-	4.02	5.28	3.84	3.54	5.42	3.35	131,0,154/c3	Fin-specific	no-mutants
LOC102358651	-	-	-	-	17.95	29.01	23.91	23.68	22.89	21.17	131,0,154/c3	Fin-specific	no-mutants
FAM129C	0.25	0.2	0.21	0.3	1.47	2.3	2.09	2.17	1.6	1.4	131,0,154/c3	Fin-specific	no-mutants
SLC7A4	0.07	0.15	0.39	0.96	1.16	1.02	0.81	1.14	1.47	0.67	131,0,154/c3	Fin-specific	no-mutants
ZNF521	-	-	-	-	7.55	4.84	6.77	7.48	5.74	10.01	131,0,154/c3	Fin-specific	no-mutants
LOC102347646	-	-	-	-	2.18	2.52	3.11	2.64	2.06	1.71	131,0,154/c3	Fin-specific	no-mutants
LOC103188147	-	-	-	-	13.1	17.59	14.58	12.57	16.24	11.12	131,0,154/c3	Fin-specific	no-mutants
LRRC74B	0	0	0.02	0	4.33	5.98	6.82	4.33	5.84	2.91	131,0,154/c3	Fin-specific	no-mutants
CPNE6	0.02	0	0.08	0.3	2.21	1.26	1.86	2.78	1.06	2.77	131,0,154/c3	Fin-specific	no-mutants
CYP2U1	0.03	0.39	0.34	0.44	1.78	2.14	1.81	1.18	2.22	1.12	131,0,154/c3	Fin-specific	probably-unrelated
MFSD13B	0.02	0	0.09	0.05	5.27	6.56	5.94	4.26	6.51	4.16	131,0,154/c3	Fin-specific	no-mutants
LOC103189025	-	-	-	-	1.35	1.79	1.71	1.42	1.67	0.84	131,0,154/c3	Fin-specific	no-mutants
LOC102356298	-	-	-	-	11.28	13.19	15.43	16.99	9.73	9.96	131,0,154/c3	Fin-specific	no-mutants
LOC103184049	-	-	-	-	6.54	3.2	3.74	5.07	6.56	7.52	131,0,154/c3	Fin-specific	no-mutants
ANKEF1	0.05	0.18	0.1	0.09	1.42	1.86	1.59	1.88	1.99	0.67	131,0,154/c3	Fin-specific	no-mutants
KIAA1328	-	-	-	-	3.88	4.91	3.93	3.71	4.03	2.95	131,0,154/c3	Fin-specific	no-mutants
LOC102357932	-	-	-	-	1.19	1.08	0.59	0.66	1.24	1.12	131,0,154/c3	Fin-specific	no-mutants
RHBDL1	0.44	0.41	0.38	0.56	1.82	2.2	1.77	1.62	2.14	1.46	131,0,154/c3	Fin-specific	embryonic lethality prior to organogenesis
LOC102353442	-	-	-	-	5.52	6.97	5.77	4.3	6.88	4.96	131,0,154/c3	Fin-specific	no-mutants
LOC102567249	-	-	-	-	16.59	22.53	21.03	19.14	17.21	14.98	131,0,154/c3	Fin-specific	no-mutants
KIAA1257	-	-	-	-	1.43	1.36	1.35	1.3	1.88	0.93	131,0,154/c3	Fin-specific	no-mutants
LOC102566577	-	-	-	-	1.75	2.19	1.73	1.62	2.06	1.4	131,0,154/c3	Fin-specific	no-mutants
LRRC31	0.2	0.02	0.08	0.18	2.93	4.14	3.34	3.08	3.28	2.99	131,0,154/c3	Fin-specific	no-mutants
D930020B18RIK	0.13	0.12	0.48	0.41	1.91	1.83	1.78	2.31	2.57	1.32	131,0,154/c3	Fin-specific	no-mutants
CYP2D26	0	0.02	0	0	5.27	3.34	3.42	5.52	5.52	6.63	131,0,154/c3	Fin-specific	no-mutants
AZGP1	0	0	0	0.04	2.38	3.31	3.18	2.15	1.07	3.47	131,0,154/c3	Fin-specific	probably-unrelated
ZPBP2	0.07	0.11	0.26	0.11	0.65	0.66	0.96	1.03	0.83	0.6	131,0,154/c3	Fin-specific	probably-unrelated
CLIC5	0.46	0.03	0.28	0.55	1.37	1.82	2.13	1.35	1.76	1.29	131,0,154/c3	Fin-specific	probably-unrelated
MSH4	0.03	0.02	0	0.01	1.03	1.38	0.69	0.84	1.38	1.11	131,0,154/c3	Fin-specific	probably-unrelated
CNN1	0.54	0.27	0.19	0.3	0.87	1.1	1.39	1.38	0.85	0.91	131,0,154/c3	Fin-specific	probably-unrelated
ARMC4	0.05	0.07	0.03	0.09	2.15	2.95	2.6	2.74	2.82	1.63	131,0,154/c3	Fin-specific	probably-unrelated
TMEM235	0	0	0	0	2.47	2.81	2.68	1.85	3.26	2.44	131,0,154/c3	Fin-specific	no-mutants
LOC102365926	-	-	-	-	1.19	0.96	1.41	1.61	1.31	0.77	131,0,154/c3	Fin-specific	no-mutants
AFG1L	-	-	-	-	8.07	10.31	9.33	8.44	8.65	7.4	131,0,154/c3	Fin-specific	no-mutants
LOC102561457	-	-	-	-	12.16	10.8	11.22	12.17	8.92	15.01	131,0,154/c3	Fin-specific	no-mutants
LOC103189494	-	-	-	-	2.59	2.96	3.58	2.44	2.28	2.73	131,0,154/c3	Fin-specific	no-mutants
DUOXA2	0.06	0.17	0	0	29.87	35.35	44.64	37.11	34.94	30.61	131,0,154/c3	Fin-specific	abnormal ulna morphology,abnormal femur morphology,abnormal humerus morphology,abnormal tibia morphology,abnormal radius morphology
LOC107078439	-	-	-	-	2.56	2.99	2.33	2.15	2.74	2.28	131,0,154/c3	Fin-specific	no-mutants
LOC102355635	-	-	-	-	32.98	23.75	26.04	26.42	34.04	39.75	131,0,154/c3	Fin-specific	no-mutants
LOC106703256	-	-	-	-	3.19	3.95	4.01	3.42	4.3	2.6	131,0,154/c3	Fin-specific	no-mutants
LOC102363594	-	-	-	-	2.14	2.49	1.27	1.84	2.64	2.42	131,0,154/c3	Fin-specific	no-mutants
MESD	-	-	-	-	41.59	58.73	54.62	48.56	55.54	40.18	131,0,154/c3	Fin-specific	probably-unrelated
IYD	0	0	0	0.03	2.86	2.78	2.22	2.31	3.55	2.75	131,0,154/c3	Fin-specific	no-mutants
PRPH2	0	0.06	0	0	1.9	1.42	1.98	2.55	1.47	2.62	131,0,154/c3	Fin-specific	probably-unrelated
LOC102345276	-	-	-	-	0.88	1.01	0.5	0.6	0.94	0.9	131,0,154/c3	Fin-specific	no-mutants
LOC102698467	-	-	-	-	5.82	3.41	5.32	6.22	4.3	7.63	131,0,154/c3	Fin-specific	no-mutants
LOC102570082	-	-	-	-	1.48	1.81	1.71	1.13	1.62	1.28	131,0,154/c3	Fin-specific	no-mutants
ADMP	-	-	-	-	6.24	7.92	7.18	5.78	8.02	4.54	131,0,154/c3	Fin-specific	no-mutants
LOC102345892	-	-	-	-	2.35	3.08	2.43	2.34	2.4	2.57	131,0,154/c3	Fin-specific	no-mutants
LOC102349640	-	-	-	-	10.14	7.32	9.48	9.58	9.59	13.25	131,0,154/c3	Fin-specific	no-mutants
PTCHD3	0.01	0.01	0.04	0.03	2.55	1.48	1.46	1.69	2.71	2.94	131,0,154/c3	Fin-specific	no-mutants
POU6F2	0.03	0.03	0.1	0.1	1.92	1.3	1.56	2.34	2.25	1.38	131,0,154/c3	Fin-specific	probably-unrelated
BUD23	-	-	-	-	22.14	22.54	31.83	26.23	21.57	22.68	131,0,154/c3	Fin-specific	no-mutants
TTC22	0.01	0.07	0.07	0.23	7.52	10.09	8.06	7.94	9.3	6.84	131,0,154/c3	Fin-specific	no-mutants
TRAF1	0.02	0.01	0.07	0.2	4.71	4.29	4.08	4.3	5.98	3.4	131,0,154/c3	Fin-specific	probably-unrelated
LOC102347122	-	-	-	-	27.52	44.02	45.09	37.79	48.53	33.38	131,0,154/c3	Fin-specific	no-mutants
LOC100857682	-	-	-	-	231.28	279.94	283.51	367.52	216	383.57	131,0,154/c3	Fin-specific	no-mutants
LOC103177660	-	-	-	-	7.28	15.05	16.65	13.38	13.47	11.69	131,0,154/c3	Fin-specific	no-mutants
CENPS	-	-	-	-	23.65	34.44	32.62	33.52	39.05	25.24	131,0,154/c3	Fin-specific	no-mutants
ANTXRL	0	0	0	0	5.51	5.33	5.89	5.26	7.32	5.23	131,0,154/c3	Fin-specific	no-mutants
LOC103186130	-	-	-	-	14.8	21.85	20.76	19.25	23.35	15.56	131,0,154/c3	Fin-specific	no-mutants
RAB5IF	-	-	-	-	13.34	19.34	17.17	15.26	20.16	14.6	131,0,154/c3	Fin-specific	no-mutants
NR0B1	0.05	0.87	0.59	0.08	1.37	1.9	2.07	2.19	1.71	1.26	131,0,154/c3	Fin-specific	probably-unrelated
RFPL4	0	0	0	0	8.64	9.76	14.5	10.33	9.44	13.23	131,0,154/c3	Fin-specific	no-mutants
LOC102361141	-	-	-	-	4.86	5.6	7.56	6.98	6.56	4.21	131,0,154/c3	Fin-specific	no-mutants
RNF213	-	-	-	-	2.15	2.95	2.27	2.65	3.01	2.05	131,0,154/c3	Fin-specific	probably-unrelated
NBEAL2	0.19	0.25	0.39	0.51	3.66	3.72	3.95	3.63	5.25	3.39	131,0,154/c3	Fin-specific	probably-unrelated
UBE2D2	-	-	-	-	5.16	7.57	6.89	6.01	7.33	4.58	131,0,154/c3	Fin-specific	no-mutants
AKR1C2	-	-	-	-	1.2	1.31	2.04	1.6	1.36	1.63	131,0,154/c3	Fin-specific	no-mutants
LOC106706019	-	-	-	-	1.95	2.74	1.97	2.03	2.48	2.37	131,0,154/c3	Fin-specific	no-mutants
LOC107078543	-	-	-	-	69.09	108.04	89.31	90.63	98.63	83.89	131,0,154/c3	Fin-specific	no-mutants
LOC103177417	-	-	-	-	4.19	4.66	5.22	4.54	3.71	6.23	131,0,154/c3	Fin-specific	no-mutants
LOC103188067	-	-	-	-	3.39	2.5	2.6	2.73	3.86	4.22	131,0,154/c3	Fin-specific	no-mutants
GLOD5	0	0.06	0.14	0.08	27.69	39.19	34.63	34	38.35	26.81	131,0,154/c3	Fin-specific	probably-unrelated
TPH2	0.04	0.12	0.1	0.05	5.5	6.12	8.74	7.34	6.62	5.9	131,0,154/c3	Fin-specific	probably-unrelated
XCC	-	-	-	-	6.67	7.37	10.25	8.17	7.15	8.74	131,0,154/c3	Fin-specific	no-mutants
LTO1	-	-	-	-	15.79	20.03	24.3	15.24	13.67	22.89	131,0,154/c3	Fin-specific	no-mutants
TBR1	0.01	0.04	0.05	0.17	4.87	5.16	7.28	7.09	4.8	5.84	131,0,154/c3	Fin-specific	probably-unrelated
INHBB	0.24	0.07	0.27	0.76	1.72	1.68	2.57	2.19	1.84	2.42	131,0,154/c3	Fin-specific	probably-unrelated
STX10	-	-	-	-	7.63	7	6.6	7.88	8.02	10.43	131,0,154/c3	Fin-specific	no-mutants
BICDL2	-	-	-	-	9.31	8.34	9.28	9.43	10.49	12.97	131,0,154/c3	Fin-specific	no-mutants
LOC102363450	-	-	-	-	15.36	12.43	17.62	21.19	15.74	21.39	131,0,154/c3	Fin-specific	no-mutants
MYH11	0.02	0.01	0.02	0.13	5.57	6.73	6.3	7.93	4.98	8.51	131,0,154/c3	Fin-specific	probably-unrelated
LOC102350981	-	-	-	-	1.34	1.03	1.34	1.88	1.51	1.73	131,0,154/c3	Fin-specific	no-mutants
LOC102353002	-	-	-	-	3.22	2.71	2.8	3.57	3.62	4.38	131,0,154/c3	Fin-specific	no-mutants
NR5A2	0.14	0.18	0.29	0.51	0.87	0.62	1.25	1.24	0.8	1.28	131,0,154/c3	Fin-specific	embryonic lethality between implantation and somite formation, incomplete penetrance,embryonic lethality during organogenesis, complete penetrance,embryonic lethality between implantation and somite formation, complete penetrance
NLGN1	0.01	0.05	0.26	0.72	2.47	1.81	2.12	2.89	3.31	3.14	131,0,154/c3	Fin-specific	probably-unrelated
SLC13A4	0.23	0.18	0.09	0.04	0.62	0.86	0.86	0.81	0.62	1.1	131,0,154/c3	Fin-specific	probably-unrelated
CNTNAP4	0.23	0.2	0.19	0.64	0.78	0.44	1.08	1.18	0.92	0.94	131,0,154/c3	Fin-specific	probably-unrelated
LOC102357034	-	-	-	-	0.79	0.74	0.59	0.79	1.05	1.14	131,0,154/c3	Fin-specific	no-mutants
RASGEF1C	0.1	0.05	0.07	0.15	1.75	2.85	2.88	2.15	3.12	2.03	131,0,154/c3	Fin-specific	no-mutants
RIMKLA	0.2	0.38	0.58	0.91	3.09	3.42	3.52	3.05	4.38	2.95	131,0,154/c3	Fin-specific	no-mutants
STAP1	0	0	0.21	0.31	0.83	1.09	1.38	1.44	1.36	0.67	131,0,154/c3	Fin-specific	no-mutants
OTOP3	0.03	0.01	0	0	1.58	2.44	2.91	1.85	2.68	2.01	131,0,154/c3	Fin-specific	no-mutants
CASKIN1	0.23	0.22	0.72	0.98	1.88	1.87	3.25	3	2.32	2.89	131,0,154/c3	Fin-specific	probably-unrelated
RNF175	-	-	-	-	8.04	17.03	16.18	14.53	17.86	10.53	131,0,154/c3	Fin-specific	no-mutants
LOC102358487	-	-	-	-	3.27	4.2	4.69	5.38	3.86	6.35	131,0,154/c3	Fin-specific	no-mutants
LOC102351060	-	-	-	-	8.6	9.24	10.09	10.78	9.64	14.01	131,0,154/c3	Fin-specific	no-mutants
LOC102570306	-	-	-	-	0.79	0.77	1.29	1	0.88	1.38	131,0,154/c3	Fin-specific	no-mutants
ZNF410	-	-	-	-	5.92	6.04	6.99	4.36	7.35	9.2	131,0,154/c3	Fin-specific	no-mutants
LOC102352409	-	-	-	-	6.8	9.15	9.26	7.81	11.69	7.61	131,0,154/c3	Fin-specific	no-mutants
ZBTB7C	0.15	0.34	0.14	0.51	2.76	4.21	4.77	3	5.19	3.73	131,0,154/c3	Fin-specific	probably-unrelated
LOC102569146	-	-	-	-	1.8	1.68	1.45	1.51	2.51	2.11	131,0,154/c3	Fin-specific	no-mutants
LOC102359632	-	-	-	-	0.82	1.2	1.63	1.23	1.02	1.52	131,0,154/c3	Fin-specific	no-mutants
2010300C02RIK	0.29	0.39	0.51	0.98	2.22	3.62	4.37	4.13	4.55	2.34	131,0,154/c3	Fin-specific	probably-unrelated
INAVA	-	-	-	-	1.23	1.59	1.36	1.33	1.98	1.53	131,0,154/c3	Fin-specific	probably-unrelated
MAL	0.2	0.39	0.05	0.65	76.02	134.27	136.12	101.54	146.53	83.07	131,0,154/c3	Fin-specific	probably-unrelated
LOC102365857	-	-	-	-	2.01	3.74	3.11	3.4	3.56	2.42	131,0,154/c3	Fin-specific	no-mutants
SYT1	0.13	0.1	0.31	0.93	1.73	2.54	3.75	3.5	1.95	3.3	131,0,154/c3	Fin-specific	probably-unrelated
LOC102347245	-	-	-	-	0.69	1.07	1.47	1.31	1.3	0.71	131,0,154/c3	Fin-specific	no-mutants
LOC102354301	-	-	-	-	3.12	5.03	6.57	5.27	4.46	4.32	131,0,154/c3	Fin-specific	no-mutants
LOC109283636	-	-	-	-	29.7	38.33	26.74	31.4	45.29	29.68	131,0,154/c3	Fin-specific	no-mutants
ZNF7L	-	-	-	-	2.8	3.87	5.75	3.99	3.69	5.24	131,0,154/c3	Fin-specific	no-mutants
SLC5A8	0.11	0.05	0.06	0.09	0.98	0.85	0.86	1.21	1.4	0.76	131,0,154/c3	Fin-specific	probably-unrelated
TMEM125	0.24	0.34	0.3	0.83	2.6	6.1	5.8	4.49	6.06	2.74	131,0,154/c3	Fin-specific	no-mutants
ANKRD22	0.48	0.26	0.15	0.44	11.38	26.03	21.56	21.66	24.77	16.36	131,0,154/c3	Fin-specific	no-mutants
LOC102353058	-	-	-	-	0.63	1.47	1.63	1.74	0.71	1.49	131,0,154/c3	Fin-specific	no-mutants
INSYN1	-	-	-	-	0.99	1.42	1.54	1.38	1.01	1.96	131,0,154/c3	Fin-specific	no-mutants
RBBP8NL	0.29	0.46	0.38	0.5	3.56	5.19	4.35	3.8	6.02	3.66	131,0,154/c3	Fin-specific	no-mutants
SELENOI	-	-	-	-	3.93	4.44	4.24	3.44	5.53	3.71	131,0,154/c3	Fin-specific	no-mutants
UPK3A	0	0	0	0	43.55	69.56	76.52	65.72	63.61	38.02	131,0,154/c3	Fin-specific	probably-unrelated
GNB3	0.02	0.13	0.09	0.13	1.53	1.61	1.83	1.08	2.16	1.49	131,0,154/c3	Fin-specific	probably-unrelated
LOC102346464	-	-	-	-	4.5	6.02	4.41	4.99	6.43	4.1	131,0,154/c3	Fin-specific	no-mutants
LOC102353584	-	-	-	-	2.81	4.28	3.33	3.79	4.12	2.35	131,0,154/c3	Fin-specific	no-mutants
LOC102345120	-	-	-	-	1.32	1.74	1.22	1.43	1.87	1.14	131,0,154/c3	Fin-specific	no-mutants
LOC102366920	-	-	-	-	2.53	4.53	4.39	4.05	4.64	1.57	131,0,154/c3	Fin-specific	no-mutants
DOC2A	0.23	0.65	0.95	0.98	0.95	1.69	1.67	1.3	0.64	1.68	131,0,154/c3	Fin-specific	probably-unrelated
SLC44A3	0.16	0.2	0.1	0.3	7.88	13.7	12.68	10.6	12.21	8.86	131,0,154/c3	Fin-specific	no-mutants
ALPK1	0.11	0.08	0.13	0.56	1.37	2.28	1.46	1.45	2.07	1.76	131,0,154/c3	Fin-specific	no-mutants
SLC38A11	0	0	0.06	0.12	1.29	1.36	1.15	1.05	1.81	0.89	131,0,154/c3	Fin-specific	no-mutants
LOC102354945	-	-	-	-	2.22	1.54	1.85	2.75	2.78	3.37	131,0,154/c3	Fin-specific	no-mutants
LOC103186577	-	-	-	-	0.52	0.88	1.11	0.96	0.34	1.2	131,0,154/c3	Fin-specific	no-mutants
LRRC63	0	0.05	0.06	0.02	1.05	1.87	1.21	1.65	1.91	1.09	131,0,154/c3	Fin-specific	no-mutants
MAP3K6	0.3	0.42	0.68	0.83	2.09	2.39	2.01	2.38	2.71	2.59	131,0,154/c3	Fin-specific	probably-unrelated
MFSD7A	0.07	0.04	0.03	0.08	3.51	3.3	3.28	3.46	4.14	4.49	131,0,154/c3	Fin-specific	no-mutants
CYP2AC1	-	-	-	-	18.05	18.86	18.32	16.36	22.11	23.97	131,0,154/c3	Fin-specific	no-mutants
LOC107077205	-	-	-	-	0.95	1.26	0.99	1.41	1.24	1.25	131,0,154/c3	Fin-specific	no-mutants
SLC27A2	0.01	0.01	0.14	0.29	19.68	19.87	23.9	25.66	23.89	28.97	131,0,154/c3	Fin-specific	probably-unrelated
LOC102349707	-	-	-	-	47.63	57.03	64.39	61.29	53.04	70.99	131,0,154/c3	Fin-specific	no-mutants
CUNH4ORF48	-	-	-	-	2.88	3.19	2.88	3.18	3.05	3.99	131,0,154/c3	Fin-specific	no-mutants
SCN2A	0.1	0.1	0.19	0.28	2.7	2.53	2.6	3.26	3.52	3.18	131,0,154/c3	Fin-specific	probably-unrelated
PRKN	-	-	-	-	1.55	1.74	1.55	1.86	1.58	2.11	131,0,154/c3	Fin-specific	probably-unrelated
ATP8B1	0.06	0.06	0.2	0.34	7.41	7.28	6.89	7.58	9.39	8.2	131,0,154/c3	Fin-specific	probably-unrelated
BCAS4	-	-	-	-	5.83	5.51	6.7	6.22	7.41	5.92	131,0,154/c3	Fin-specific	no-mutants
LOC102357945	-	-	-	-	3	2.57	3.56	3.37	3.32	4.04	131,0,154/c3	Fin-specific	no-mutants
PLEKHG4B	-	-	-	-	12.98	11.91	12.99	13.33	15.91	14.82	131,0,154/c3	Fin-specific	no-mutants
EIF3J2	0.31	0.19	0.1	0.25	27.2	31.29	30.53	29.47	36.35	31.75	131,0,154/c3	Fin-specific	no-mutants
LOC102563728	-	-	-	-	1.01	0.98	0.97	1.06	1.24	1.13	131,0,154/c3	Fin-specific	no-mutants
CRYBG2	-	-	-	-	9.48	10	12.45	9.67	13.14	10.77	131,0,154/c3	Fin-specific	no-mutants
SLC4A11	0.07	0.1	0.22	0.22	2.09	1.82	2.3	2.2	2.58	2.85	131,0,154/c3	Fin-specific	probably-unrelated
TDH	0.46	0	0.09	0.3	9.22	11.33	9.23	10.76	12.91	11.89	131,0,154/c3	Fin-specific	no-mutants
LOC102359238	-	-	-	-	2.39	3.26	3.19	3.19	2.73	3.7	131,0,154/c3	Fin-specific	no-mutants
LOC102365632	-	-	-	-	1.62	2.08	2.39	2.48	1.98	2.05	131,0,154/c3	Fin-specific	no-mutants
LOC102568168	-	-	-	-	75.56	77.42	84.91	106.9	100.72	92.11	131,0,154/c3	Fin-specific	no-mutants
EFCC1	0.28	0.1	0.09	0.1	26.45	21.05	29.62	26.38	33.35	34.84	131,0,154/c3	Fin-specific	no-mutants
CCNQ	-	-	-	-	55.33	50.5	46.66	61.91	56.12	69.6	131,0,154/c3	Fin-specific	embryonic lethality prior to tooth bud stage
EPSTI1	0.04	0	0.22	0.45	0.81	0.81	1.14	0.86	0.97	0.97	131,0,154/c3	Fin-specific	no-mutants
LOC102569453	-	-	-	-	1726.49	2682.97	2784.36	2623.48	2441.76	2170.87	131,0,154/c3	Fin-specific	no-mutants
GNA14	0.39	0.3	0.27	0.55	12.2	18.81	16.95	17.01	17.8	16.86	131,0,154/c3	Fin-specific	no-mutants
CCDC88B	0.05	0.09	0.17	0.33	2.04	1.99	2.01	2.75	2.32	2.67	131,0,154/c3	Fin-specific	probably-unrelated
PPP1R14D	0.35	0.05	0.29	0.21	8.34	9.31	10.57	9.16	11.31	8.44	131,0,154/c3	Fin-specific	probably-unrelated
SRCIN1	0.17	0.21	0.42	0.7	1.18	1.25	0.93	1.58	1.34	1.5	131,0,154/c3	Fin-specific	probably-unrelated
FAAH2	-	-	-	-	4.49	4.39	4.1	4.81	4.99	5.97	131,0,154/c3	Fin-specific	no-mutants
QKI	-	-	-	-	49.77	57.4	58.4	61.78	68.65	75.49	131,0,154/c3	Fin-specific	no-mutants
LOC102358273	-	-	-	-	0.98	1.38	1.44	1.64	1.61	1.47	131,0,154/c3	Fin-specific	no-mutants
CDK15	0	0.05	0.03	0.06	2.97	3.22	3.96	3.73	4.21	3.47	131,0,154/c3	Fin-specific	no-mutants
PIRT	0.03	0.05	0.03	0.08	4.38	6.68	6.56	7.37	6.87	5.65	131,0,154/c3	Fin-specific	probably-unrelated
LOC102561497	-	-	-	-	17.67	17.7	18.53	20.41	22.26	25.05	131,0,154/c3	Fin-specific	no-mutants
LOC103174924	-	-	-	-	5.73	8.46	7.74	8.59	8.18	7.58	131,0,154/c3	Fin-specific	no-mutants
FSIP1	0.54	0.84	0.9	0.81	1.9	2.69	2.7	2.99	2.92	2.15	131,0,154/c3	Fin-specific	no-mutants
PUDP	-	-	-	-	3.31	3.97	4.91	3.72	4.9	4.36	131,0,154/c3	Fin-specific	no-mutants
RAB26	0.09	0.21	0.27	0.31	3.12	3.7	3.72	3.59	3.96	4.79	131,0,154/c3	Fin-specific	no-mutants
GPR68	0.14	0.11	0.23	0.11	2.68	3.34	4.28	4.17	4.47	3.63	131,0,154/c3	Fin-specific	probably-unrelated
LOC102363082	-	-	-	-	2.89	3.97	4.45	3.37	4.18	4.78	131,0,154/c3	Fin-specific	no-mutants
LEMD1	0.07	0.36	0.3	0.05	23.78	24.85	30.84	29.18	32.51	29.52	131,0,154/c3	Fin-specific	no-mutants
LOC102364754	-	-	-	-	4.68	5.62	5.78	6.27	6.63	6.82	131,0,154/c3	Fin-specific	no-mutants
[truncated: 13,908 more rows]

## Sheet: Sheet2
CNST	3.44	6.12	8.86	12.02	2.39	3.07	2.83	2.7	3.5	3.12	0,0,0:c1	no-mutants
TNFRSF19	18.42	23.13	26.99	44.62	27.06	28.27	33.23	32.81	35.91	35.06	0,0,0:c1	probably-unrelated
LRRC8D	4.79	8.1	12.2	15.35	37.18	30.02	42.55	42.12	42.72	45.94	0,0,0:c1	no-mutants
SLC9A1	3.86	7.64	11.13	13.98	6.48	5.9	7.73	6.94	8.32	7.7	0,0,0:c1	probably-unrelated
ATL1	0.71	1.28	1.23	2.22	8.12	8.87	9.65	9.23	11.39	10.21	0,0,0:c1	abnormal autopod morphology
TOB2	3.54	6.48	11.9	13.2	10.99	10.01	12.82	12.97	14.48	14.38	0,0,0:c1	probably-unrelated
TMEM263	11.89	18.09	31.82	41.46	36.6	54.62	51.74	47.7	60.37	46.49	0,0,0:c1	no-mutants
ZFP652	6.39	10.36	17.35	19.81	9.11	9.82	9.81	9.97	12.45	11.17	0,0,0:c1	no-mutants
UBC	218.17	325.96	495.41	679.36	2129.81	2570.91	2874.97	3091.78	2686.44	3039.38	0,0,0:c1	embryonic lethality during organogenesis, incomplete penetrance
PLCD1	1.98	5.88	10.65	12.02	27.44	37.29	41.47	33.28	42.21	43.58	0,0,0:c1	probably-unrelated
UBR4	4.68	7.39	12.51	14.7	25.68	22.37	24.91	28.34	34.44	27.8	0,0,0:c1	embryonic lethality during organogenesis, complete penetrance
TMEM127	9.29	14.71	21.34	27.99	16.37	16.12	18.24	18.06	19.96	21.19	0,0,0:c1	polydactyly
TOB1	4.93	9.82	20.84	23.39	10.62	16.19	16.58	17.27	18.2	18.32	0,0,0:c1	probably-unrelated
RAB27A	1.43	4.09	7.78	9.09	10.53	15.18	14.52	15.39	17.61	13.87	0,0,0:c1	probably-unrelated
P3H2	2.83	2.9	4.65	7.43	5.8	7.94	4.83	9.27	6.82	9.22	0,0,0:c1	embryonic lethality during organogenesis, complete penetrance,embryonic lethality, incomplete penetrance
SORT1	6.84	13.82	21.24	25.27	8.81	9.22	11.58	11.61	11.63	12.93	0,0,0:c1	probably-unrelated
SYTL1	0.53	1.15	1.77	2.3	16.18	33.01	29.06	28	34.39	30.15	0,0,0:c1	probably-unrelated
STK17B	3.66	4.94	7.43	10.18	2.83	4.27	3.56	3.84	4.87	4.55	0,0,0:c1	probably-unrelated
PXK	3.57	6.88	9.39	12.15	3.84	5.78	6.69	6.03	2.87	3.65	0,0,0:c1	no-mutants
WDFY1	5.23	8.99	13.94	16.14	47.73	48.5	50.7	55.75	59.83	64.12	0,0,0:c1	no-mutants
RNF144B	1.56	1.78	1.84	3.52	0.66	1.01	0.85	0.87	1.05	1.07	0,0,0:c1	probably-unrelated
SLC18B1	2.45	6.97	11.74	14.57	7.34	11.08	10.52	9.93	13.5	7.41	0,0,0:c1	no-mutants
PITPNC1	4.13	10.18	12.12	16.53	18.32	13.42	19.61	19.99	19.84	22.47	0,0,0:c1	no-mutants
SLA	0.44	0.82	1.89	2.19	0.72	1.11	1.44	0.89	0.89	0.81	0,0,0:c1	probably-unrelated
TMEM104	1.39	2.2	3.33	4.43	5.18	4.91	5.65	5.43	6.84	5.41	0,0,0:c1	no-mutants
COL4A3BP	4.98	7.3	10.9	13.42	6.24	6.16	6.12	7.04	7.18	8.49	0,0,0:c1	embryonic lethality during organogenesis, complete penetrance
MACF1	5.8	4.3	8.88	12.61	48.56	57.29	63.76	82.18	74.16	72.77	0,0,0:c1	embryonic lethality between implantation and somite formation, complete penetrance
PCIF1	11.32	23.3	36.5	40.34	3.81	4.99	4.39	6.48	6.06	6.05	0,0,0:c1	no-mutants
CARD19	6.3	9.69	15.93	18.84	3.04	4.72	4.88	4.67	5.72	4.98	0,0,0:c1	no-mutants
SLC10A7	5.5	8.69	9.97	15.82	2.7	4.85	5.09	3.91	5.72	3.84	0,0,0:c1	no-mutants
ELMSAN1	3.54	5.24	7.86	9.72	28.01	23.88	30.06	31.95	31.46	37.88	0,0,0:c1	no-mutants
PLPP5	6.58	9.34	13.58	18.17	12.26	9.85	12.13	12.3	13.5	15.86	0,0,0:c1	no-mutants
ETV1	4.1	3.43	4.63	8.56	13.73	14.03	18.48	21.54	20.61	21.26	0,0,0:c1	probably-unrelated
USHBP1	0.36	0.7	1.07	1.55	2.14	2.56	3.75	2.98	1.71	2.25	0,0,0:c1	probably-unrelated
SLK	6.26	6.61	11.71	14.68	17.33	20.5	23.61	24.24	24.28	26.14	0,0,0:c1	abnormal limb development
GLB1	6.91	15.83	19.8	25.7	11.53	12.15	17.27	15.72	14.96	18	0,0,0:c1	probably-unrelated
TAGLN	16.08	7.27	8.78	24.76	84.71	175.63	220.77	233.58	216.81	178.7	0,0,0:c1	probably-unrelated
CASKIN2	5.38	7.42	11.89	15.13	4.23	3.7	4.07	4.31	4.41	5.59	0,0,0:c1	probably-unrelated
PDE2A	2.09	6.64	6.09	9.23	2.24	2.39	2.73	2.39	2.9	3.25	0,0,0:c1	probably-unrelated
NYAP1	0.78	1.8	4.01	4.24	14.3	9.45	17.28	20.86	12.31	15.18	0,0,0:c1	no-mutants
PACS1	9.93	19.25	28.87	36.05	6.17	5.51	5	6.37	6.6	8.28	0,0,0:c1	no-mutants
CHMP2B	34.74	42.35	61.64	93.26	16.07	22.94	23.19	23.46	26.84	28.97	0,0,0:c1	probably-unrelated
PLEKHO2	2.71	4.98	7.51	9.28	27.28	29.79	27.04	28.63	28.47	39.1	0,0,0:c1	no-mutants
CCBE1	1.13	0.71	1.6	2.15	1.95	2.71	2.81	2.81	2.69	3.37	0,0,0:c1	probably-unrelated
S100A10	140.14	116.31	139.76	294.33	190.61	486.22	402.99	503.27	538.76	516.19	0,0,0:c1	probably-unrelated
B2M	37.67	71.01	96.84	135.59	56.52	79.3	103.03	93.95	112.25	93.5	0,0,0:c1	embryonic lethality during organogenesis, incomplete penetrance
GRN	16.03	39.97	54.51	71.58	66.42	57.72	77.09	73.32	82.93	93.38	0,0,0:c1	probably-unrelated
FAM126B	1.17	1.17	1.66	2.29	2.52	2.75	1.78	2.39	2.22	3.26	0,0,0:c1	no-mutants
MARCH9	3.43	4.83	11.24	15	1.22	1.26	0.23	0.83	1.84	0.82	0,0,0:c1	probably-unrelated
ANXA11	3.57	4.19	6.88	10.43	183.38	223.36	249.4	265.4	300.85	315.96	0,0,0:c1	no-mutants
CNNM4	1.7	3.59	6.3	7.49	8.39	5.89	9.18	8.14	9.76	11.01	0,0,0:c1	probably-unrelated
DAPK2	1.54	1.9	4.21	5.24	5.99	7.22	7.54	8.57	8.79	9.56	0,0,0:c1	probably-unrelated
SOX7	1.57	4.1	4.92	7.7	1.53	2.34	2.07	2.97	1.36	2.32	0,0,0:c1	embryonic lethality during organogenesis, incomplete penetrance
TEX264	9.21	18.36	25.68	36.05	29.12	31.02	38.43	40.5	35.76	46.4	0,0,0:c1	no-mutants
JAG2	5.83	6.32	7.37	12.75	9.15	6.6	9.13	10.76	9.75	12.42	0,0,0:c1	abnormal embryonic autopod plate morphology,abnormal tail morphology,abnormal phalanx morphology,syndactyly,abnormal autopod morphology,fused phalanges,abnormal digit development
BTG2	2.52	5.46	12.64	14.63	39.04	64.19	65.16	69.06	83.61	66.18	0,0,0:c1	probably-unrelated
GALNT4	2.21	4.38	5.23	8.53	5.6	6.28	6.45	6.14	8.3	8.12	0,0,0:c1	probably-unrelated
TSPAN5	10.83	10.87	15.26	24.35	11.65	8.96	11.84	11.46	11.77	15.93	0,0,0:c1	no-mutants
BCL6B	1.66	3.73	4.59	6.62	18.02	15.17	16.05	16.39	15.59	22.61	0,0,0:c1	probably-unrelated
IFNGR2	8.19	16.55	24.9	36.28	4.54	4.48	5.91	5.61	7.05	5.96	0,0,0:c1	probably-unrelated
GNS	11.9	21.8	32.52	42.72	5.1	4.62	5.71	6.34	7.42	6.53	0,0,0:c1	probably-unrelated
IL13RA1	2.27	2.77	4.01	5.93	8.86	15.61	15.43	17.22	17.57	16.99	0,0,0:c1	probably-unrelated
STX2	4.82	9.28	14.84	18.33	6.07	4.91	6.58	5.44	6.05	7.81	0,0,0:c1	probably-unrelated
STX17	3.53	5.58	8.61	11.16	23.63	24.23	24.93	30.34	25.12	34.27	0,0,0:c1	no-mutants
HDAC11	6.42	9.89	16.33	21.37	1.57	2.69	3.4	2.97	3.36	3.42	0,0,0:c1	probably-unrelated
SYDE2	1.79	1.89	2.84	4.45	5.12	6.25	7.94	8.3	8.46	7.79	0,0,0:c1	no-mutants
ZFP106	14.68	14.31	23.02	30.88	28.16	19.46	20.9	21.13	20.61	33	0,0,0:c1	probably-unrelated
TEK	2.38	4.24	5.7	7.96	9.77	12.32	14.07	16.86	14.93	14.1	0,0,0:c1	embryonic lethality during organogenesis, complete penetrance
MAP1LC3A	35.6	59.1	90.05	115.05	32.8	43.91	47.71	51.35	56.96	53.25	0,0,0:c1	no-mutants
PPARD	4.39	7.21	11.22	14.15	2.84	3.34	3.88	4.21	4.09	4.55	0,0,0:c1	embryonic lethality during organogenesis, incomplete penetrance
C2CD3	4.28	7.62	13.99	17.56	20.22	18.14	22.59	27.77	18.67	26.43	0,0,0:c1	polydactyly,embryonic lethality during organogenesis, complete penetrance
IRF2	2.42	2.86	6.61	9.2	0.61	0.84	0.79	1.1	1.03	0.59	0,0,0:c1	probably-unrelated
KIF1C	9.26	14.96	23.91	33.08	13.35	11.9	15.44	16.64	14.65	18.06	0,0,0:c1	probably-unrelated
BSPRY	0.92	1	1.09	2.07	3.92	5.39	5.33	6.28	5.82	6.24	0,0,0:c1	no-mutants
RARA	11.63	16.53	28.29	36.31	12.95	11.78	11.91	14.64	14.13	16.51	0,0,0:c1	interdigital webbing
TBC1D23	3.16	4.26	7.7	9.76	10.76	15.67	15.1	16.19	17.19	17.21	0,0,0:c1	probably-unrelated
ACAP2	4.81	6.61	10.06	13.75	9.13	12.69	11.85	11.74	10.86	14.53	0,0,0:c1	no-mutants
OXCT1	27.72	87.93	126.34	157.12	42.38	41.66	55.5	62.5	61.22	63.3	0,0,0:c1	probably-unrelated
RGS3	4.68	8.78	16.86	21.82	10.98	19.86	17.77	17.98	22.52	17.94	0,0,0:c1	probably-unrelated
SH3PXD2B	6.17	19.8	33.91	42.13	15.37	15.06	18.08	15.08	16.57	20.85	0,0,0:c1	probably-unrelated
FAM49A	1.73	2.89	4.61	7.01	4.61	5.17	5.26	5	6.82	4.99	0,0,0:c1	no-mutants
SYTL4	0.57	1.15	2.05	2.5	9.47	12.76	10.06	12.46	11.79	13.94	0,0,0:c1	probably-unrelated
DCHS1	6.67	21.81	40.47	47.33	7.77	6.16	8.71	10.75	10.19	10.5	0,0,0:c1	probably-unrelated
TBC1D24	1.92	2.87	5.03	6.89	2.51	2.91	2.88	3.6	3.31	3.58	0,0,0:c1	no-mutants
LOXL2	25.4	22.72	28.7	58.03	60.65	51.93	65.13	61.08	63.54	74.87	0,0,0:c1	probably-unrelated
HERC3	0.55	1.41	3	3.19	5.05	4.67	5.12	5.24	4.93	6.62	0,0,0:c1	probably-unrelated
SLC41A1	2.51	5.27	8.1	10.18	23.31	17.08	22.36	19.13	21.51	27.69	0,0,0:c1	no-mutants
SH3GLB1	20.98	28.35	42.33	62.09	43.73	57.79	59.25	61.18	61.47	64.38	0,0,0:c1	probably-unrelated
NHLRC3	2.09	3.42	5.74	7.56	18.71	21.18	24.14	27.24	26.87	27.51	0,0,0:c1	no-mutants
ZMYND11	12.85	15.81	26.42	38.37	21.46	24.83	22.61	24.69	30.8	27.27	0,0,0:c1	probably-unrelated
ITM2B	88.9	141.81	224.33	324.51	84.26	118	112.59	115.06	133.93	120.87	0,0,0:c1	probably-unrelated
PIP4K2B	12.05	18.49	30.18	39.73	12.23	13.68	15.13	14.61	16.5	17.13	0,0,0:c1	embryonic lethality during organogenesis, complete penetrance
RBFOX2	19.67	32.11	50.94	67.43	2.31	2.71	2.85	2.9	3.36	3.35	0,0,0:c1	probably-unrelated
FOXC1	1.61	2.79	11.77	11.12	6.49	10.23	11.26	10.07	9.72	9.84	0,0,0:c1	abnormal fibula morphology,abnormal tibia morphology,abnormal phalanx morphology,short limbs,abnormal femur morphology,abnormal limb bone morphology,embryonic lethality during organogenesis, complete penetrance,abnormal humerus morphology,abnormal hindlimb morphology
LRIG3	5.03	20.82	30.88	38.77	30.49	29.25	36.07	39.12	40.85	35.74	0,0,0:c1	probably-unrelated
PHACTR4	8.95	14.79	25.83	29.85	7.65	4.59	8.22	8.71	9.55	8.17	0,0,0:c1	embryonic lethality during organogenesis, incomplete penetrance
GJC3	0.64	0.62	1.13	1.48	114.58	75.92	120.43	114.89	138.82	118.45	0,0,0:c1	probably-unrelated
DDHD1	1.81	2.17	3.62	5.08	4.83	3.56	4.46	4.51	5.94	4.85	0,0,0:c1	probably-unrelated
SIK1	5.86	6.86	10.33	15.39	1.79	1.43	1.89	1.89	2.24	2.11	0,0,0:c1	probably-unrelated
SFT2D2	4.6	10.37	14.48	19.12	6.02	6.47	5.86	5.1	8.41	6.44	0,0,0:c1	no-mutants
ZFP423	8.02	15.54	24.15	30.95	44.59	38.37	44.25	48.32	54.99	49.29	0,0,0:c1	probably-unrelated
SLC8B1	1	1.96	2.89	3.72	2.82	2.94	3.34	3.58	3.52	3.6	0,0,0:c1	probably-unrelated
TMEM131	11.4	14.72	26.48	34.2	3.87	7.15	6.24	5.33	5.68	6.35	0,0,0:c1	no-mutants
WSCD1	0.25	0.77	1.24	1.59	0.72	0.78	1.02	0.91	0.61	0.6	0,0,0:c1	probably-unrelated
ROBO4	1.18	5.17	6.76	9.54	7.73	6.38	9.83	12.3	10.54	5.21	0,0,0:c1	probably-unrelated
LPP	1.83	3.1	5.44	7.43	5.46	8.03	6.49	6.74	9.07	6.14	0,0,0:c1	probably-unrelated
CHST14	11.05	21.11	31.97	41.74	9.48	11.36	11.05	9.78	13.75	11.01	0,0,0:c1	abnormal tibia morphology
RDH14	7.93	14.06	18.01	25.16	23.22	24.56	24.05	26.45	24.86	30.22	0,0,0:c1	no-mutants
ASIC2	0.64	0.57	0.18	1.23	1.9	1.45	2.04	1.86	2.05	2.28	0,0,0:c1	probably-unrelated
RALGAPA1	3.55	5.54	8.04	11.16	2.58	2.87	2.57	3.06	2.63	3.34	0,0,0:c1	no-mutants
CUX2	0.59	1.02	2.52	3.03	8.4	7.44	12.22	4.98	7.71	7.02	0,0,0:c1	probably-unrelated
FCHSD2	4.85	8.46	14.53	16.75	5.66	6.12	6.37	6.3	7.27	6.66	0,0,0:c1	no-mutants
SLC11A1	0.49	0.62	1.2	1.41	1.12	1.5	1.74	1.34	1.06	1.53	0,0,0:c1	probably-unrelated
RNF24	2.48	6.59	11.79	13.04	2.69	3.49	3.78	3.29	3.72	3.36	0,0,0:c1	no-mutants
RHPN1	0.91	1.81	2.6	3.43	1.55	1.9	2.06	1.64	2.26	1.67	0,0,0:c1	probably-unrelated
SNX9	11.29	17.09	23.53	32.69	3.87	4.67	4.87	4.5	3.98	5.13	0,0,0:c1	no-mutants
GNB4	11.7	15.09	18.47	27.17	7.02	7.1	9.16	7.5	7.42	8.81	0,0,0:c1	no-mutants
4931406P16RIK	5.4	9.55	12.74	17.14	16.33	18.33	21.5	19.83	17.67	21.39	0,0,0:c1	no-mutants
RPH3AL	0.46	0.84	2.67	2.45	2.42	3.58	4.32	3.96	3.01	3.53	0,0,0:c1	probably-unrelated
SLCO3A1	1.6	3.02	3.53	5.23	0.93	1.68	1.54	1.45	1.58	1.36	0,0,0:c1	no-mutants
TTYH3	25.18	61.9	101.6	113.33	37.37	31.4	36.19	37.43	45.38	45.81	0,0,0:c1	no-mutants
RNF217	5.09	7.87	10.36	15	2.39	2.78	2.8	2.83	3.39	2.5	0,0,0:c1	no-mutants
PLEKHM1	2.61	4.31	6.66	8.77	2.97	3.09	3.05	2.91	3.89	3.23	0,0,0:c1	probably-unrelated
GHDC	2.85	3.9	5.56	7.45	14.2	16.77	13.72	17.65	15.29	18.64	0,0,0:c1	no-mutants
CYB5D2	1.21	1.18	2.45	3.08	12.91	18.87	16.94	16.81	17.11	17.49	0,0,0:c1	probably-unrelated
LDLRAP1	6.57	11.64	16.49	21.22	3.03	3.36	3.15	3.2	2.87	3.62	0,0,0:c1	probably-unrelated
USP49	2.17	3.67	6.64	8.74	1.01	1.15	1.42	1.09	0.72	0.9	0,0,0:c1	no-mutants
SLC36A4	4.02	9.6	19.28	18.87	3.27	3.09	3.49	4.09	4.1	3.79	0,0,0:c1	no-mutants
EXOC8	1.93	1.42	2.56	3.51	29.6	21.83	28.52	27.56	25.03	35.62	0,0,0:c1	embryonic lethality prior to tooth bud stage,embryonic lethality prior to organogenesis
CLCN5	7.01	11.29	19.55	25.14	5.65	7.13	7.02	6.7	8	6.59	0,0,0:c1	probably-unrelated
LPAR1	32.05	72.75	118.52	136.95	23.97	17.62	23.47	25.71	26.17	27.88	0,0,0:c1	probably-unrelated
CHST10	2.79	4.92	8.48	10.55	3.92	4.2	4.02	4.17	5.26	4.21	0,0,0:c1	probably-unrelated
SYDE1	8.43	17.33	27.14	33.59	32.69	37.58	34.02	35.79	28.86	42.02	0,0,0:c1	probably-unrelated
ITGA6	11.44	13.21	17.8	28.01	11.91	11.7	13.19	13.29	15.09	13.1	0,0,0:c1	probably-unrelated
UST	2.14	2.43	4.71	5.64	6.34	6.9	6.92	7.41	6.47	8.19	0,0,0:c1	no-mutants
CRTAP	25.13	42.56	58.61	87.04	13.86	15.87	16.75	15.15	17.78	16.22	0,0,0:c1	probably-unrelated
SLC44A2	11.36	24.99	34.15	47.49	40.82	41.26	48.84	50.3	51.4	51.27	0,0,0:c1	probably-unrelated
RNF43	1.01	1.02	1.23	2.25	5.45	4.85	5.31	6.16	6.29	5.54	0,0,0:c1	probably-unrelated
CARF	1.1	0.97	1.66	2.65	5.82	6.38	6.17	6.22	5.62	7.3	0,0,0:c1	probably-unrelated
SOCS5	3.51	7.15	11.91	15.01	4.43	3.99	4.31	4.2	5.82	3.8	0,0,0:c1	probably-unrelated
PRKCH	2.44	4.64	6.14	9.46	4.64	3.53	4.65	4.33	5.88	2.99	0,0,0:c1	probably-unrelated
FAM167B	1.85	2.53	2.44	5.57	0.57	1.28	0.99	1.11	1.09	0.9	0,0,0:c1	no-mutants
FAM214B	1.79	3.27	5.47	8.26	2.18	4.25	3.51	3.13	3.06	3.44	0,0,0:c1	no-mutants
PIEZO1	3.77	5.32	7.62	10.79	4.36	3.24	5	5.18	5.24	4.25	0,0,0:c1	embryonic lethality during organogenesis, incomplete penetrance
PSEN2	1.76	3.88	5.77	7.83	7.63	8.86	10.49	10.59	9.51	10.86	0,0,0:c1	probably-unrelated
MXD4	6.75	14.09	40.05	37.89	16.64	16.33	18.14	18.13	20.11	21.29	0,0,0:c1	no-mutants
WASF2	10.26	23.93	39.55	48.69	36.47	36.61	39.28	38.86	45.08	42.72	0,0,0:c1	embryonic lethality during organogenesis, complete penetrance
TOM1L2	2.68	5.2	9.84	12.39	25.58	31.22	37.5	32.2	34.86	38.2	0,0,0:c1	probably-unrelated
TTBK2	1.29	1.78	3.77	5.45	1.26	0.92	1.4	1.72	1.48	1.16	0,0,0:c1	embryonic lethality during organogenesis, complete penetrance,abnormal limb development
FLII	11.77	19.17	29.61	35.05	20.27	15.16	18.09	18.86	19.74	24.44	0,0,0:c1	embryonic lethality at implantation, complete penetrance
HCFC1R1	15.71	27.01	39.55	51.22	41.52	37.54	52.33	47.22	37.62	56.24	0,0,0:c1	no-mutants
HIPK1	6.81	11.7	19.33	22.24	6.82	7.77	7.48	7.55	9.7	8.49	0,0,0:c1	embryonic lethality during organogenesis, incomplete penetrance,embryonic lethality during organogenesis
GOLGA2	7.76	8.25	13.86	17.62	22.41	21.67	23.63	20.89	24.35	28.97	0,0,0:c1	no-mutants
MEGF8	4.02	10.23	15.18	17.49	53.68	44.15	53.32	48.41	64.55	52.93	0,0,0:c1	polydactyly,abnormal autopod morphology,preaxial polydactyly,delayed limb development
BAHD1	3.15	5.24	8.71	10.29	6.05	5.1	5.75	6.43	5.69	7.29	0,0,0:c1	oligodactyly
RAB12	18.35	26.13	34.31	47.47	16.81	20.48	18.9	21.39	23.92	23.33	0,0,0:c1	no-mutants
ARFGAP1	15.19	21.66	28.19	38.47	12	11.54	12.89	12.08	14.86	14.98	0,0,0:c1	no-mutants
TGFB1	4.65	7.08	11.07	13.22	1.62	1.44	1.8	1.26	1.53	2.07	0,0,0:c1	embryonic lethality during organogenesis, incomplete penetrance
DYNC1H1	9.04	13.6	25.97	28.48	103.42	150.94	160.02	153.99	159.63	153.19	0,0,0:c1	embryonic lethality between somite formation and embryo turning, complete penetrance,embryonic lethality between implantation and somite formation, complete penetrance
KBTBD7	6.26	12.78	18.51	22.35	10.45	8.93	13.04	10.87	13.94	10.28	0,0,0:c1	no-mutants
NEDD4	248.11	522.49	787.25	876.7	5.21	5.85	5.74	7.04	6.6	6.84	0,0,0:c1	probably-unrelated
EAF2	1.82	1.89	4.46	5.32	4.3	8.45	6.44	5.87	6.76	6.76	0,0,0:c1	probably-unrelated
CLTB	7	8.23	12.1	16.27	144.91	188.77	191.32	203.02	176.38	191.23	0,0,0:c1	no-mutants
4930523C07RIK	0.45	0.51	1.01	1.41	23.27	45.73	33.79	33.51	41.84	28.24	0,0,0:c1	no-mutants
CDR2	12.48	14.48	21.88	28.06	6.15	5.92	7.2	7.04	8.15	6.43	0,0,0:c1	probably-unrelated
CTDSP2	40.88	101	156.5	189.12	6.43	8.34	9.41	7.87	9.94	6.94	0,0,0:c1	probably-unrelated
RNF169	2.83	4.67	8.36	9.37	4.5	5.32	6.33	5.87	5.58	6.28	0,0,0:c1	probably-unrelated
TMEM245	1.94	2.89	4.12	5.22	6.22	6.02	8.22	7.81	7.28	8.07	0,0,0:c1	no-mutants
CHN2	2.48	2.91	4.19	6.74	7.88	14.03	12.59	11.87	14.99	10.65	0,0,0:c1	probably-unrelated
PDXDC1	15.74	26.34	38.84	47.34	62.16	68.92	67.61	70.21	82.68	77.32	0,0,0:c1	no-mutants
ANO10	5.3	13.7	19.78	24.69	19.34	22.21	23.99	21.12	27.11	22.57	0,0,0:c1	probably-unrelated
FKBP9	54.31	83.35	112.44	154.99	25.92	31.65	38.34	34.84	37.18	36.41	0,0,0:c1	probably-unrelated
2310022B05RIK	20.32	40.83	52.41	67.54	18.25	22.88	22.41	21.86	22.09	25.34	0,0,0:c1	probably-unrelated
ITGB1	87.64	110.68	150.34	208.22	130.53	115.26	135.98	144.9	164.19	149.06	0,0,0:c1	embryonic lethality between implantation and somite formation, complete penetrance,embryonic lethality, complete penetrance,embryonic lethality, incomplete penetrance,abnormal limb morphology,embryonic lethality during organogenesis, complete penetrance,embryonic lethality before implantation, complete penetrance,embryonic lethality during organogenesis, incomplete penetrance,abnormal digit devel…
KLF13	3.65	5.39	8.91	9.99	5.78	5.27	5.91	5.59	7.35	5.93	0,0,0:c1	probably-unrelated
NFKB1	6.67	9.37	12.82	16.11	11	11.45	11.71	11.55	12.21	14.1	0,0,0:c1	abnormal long bone morphology
SLC9A6	5.48	8.43	10.55	13.5	8.49	8.94	8.87	9.15	10.27	11.04	0,0,0:c1	probably-unrelated
SLC36A1	0.92	2.3	3.09	3.7	4.89	5.7	5.85	5.45	6.73	5.4	0,0,0:c1	no-mutants
PNPLA8	10.88	13.53	18.35	23.9	17.64	17.27	18.68	20.18	22.95	21.09	0,0,0:c1	probably-unrelated
MAPK9	5.59	12.51	17.64	20.72	11.34	13.95	15.91	13.85	16.45	14.78	0,0,0:c1	probably-unrelated
MCUB	0.86	6.57	11.75	6.57	8.35	10.51	14.29	12.28	16.3	10.48	0,0,0:c1	probably-unrelated
ZBTB44	2.42	3.53	5.29	6.47	7.33	8.73	10.34	8.82	9.85	9.32	0,0,0:c1	no-mutants
DUSP7	16.54	28.65	51.7	56.35	25.34	36.11	38.37	38.54	39.26	32.48	0,0,0:c1	probably-unrelated
AP1S3	1.95	2.64	3.64	5.1	4.92	8.9	6.44	4.87	8.32	4.47	0,0,0:c1	no-mutants
RHOB	47.92	46.6	57.32	84.71	80.64	97.68	96.23	103.29	85.6	107.3	0,0,0:c1	probably-unrelated
PANK3	8.02	17.48	28.55	34.19	0.76	1.5	1.2	1.07	1.47	0.77	0,0,0:c1	no-mutants
MAP3K3	9.89	14.88	21.51	26.49	3.34	3.54	3.87	3.52	3.73	4.27	0,0,0:c1	embryonic lethality during organogenesis, complete penetrance
CERS6	3.37	4.42	6.23	8.57	11.16	12.97	12.79	11.33	15.42	13.52	0,0,0:c1	probably-unrelated
STK3	10.85	17.19	25.78	28.64	3.09	4.12	4.26	3.12	3.8	4.38	0,0,0:c1	short limbs,embryonic lethality during organogenesis, complete penetrance,abnormal limb bone morphology
MTMR1	2.05	3.83	5.94	6.76	22.59	16.91	20.45	19.74	23.67	25.27	0,0,0:c1	probably-unrelated
SGSH	1.63	2.46	4.08	4.71	5.03	2.66	4.66	4.57	4.39	5.63	0,0,0:c1	probably-unrelated
RHOF	0.51	1.14	3.27	2.38	1.19	2.87	2.32	3.1	2.15	1.79	0,0,0:c1	probably-unrelated
FNBP1L	19.96	37.07	58	69.05	9.68	12.61	12.33	11.55	12.36	11.04	0,0,0:c1	probably-unrelated
RNF11	29.38	35.42	53.1	70.69	17.72	19.02	17.84	19.92	21.5	19.03	0,0,0:c1	no-mutants
GALNT2	18.26	34.36	48.72	61.65	27.76	28.46	29.81	28.01	33.12	30.2	0,0,0:c1	no-mutants
GP1BB	0.49	0.98	3.09	2.04	1.19	1.79	1.96	2.23	1.92	1.7	0,0,0:c1	probably-unrelated
PLK2	31.39	36.69	39.4	69.82	16.54	28.42	28.99	28.67	26.05	23.41	0,0,0:c1	probably-unrelated
TRIM3	2.94	4.97	7.34	8.67	4.13	5.15	4.53	4.35	4.53	5.12	0,0,0:c1	probably-unrelated
NTF3	3.7	9.75	15.77	18.82	4.58	4.72	5.51	4.86	5.81	4.51	0,0,0:c1	probably-unrelated
SEC14L1	14	27.07	39.82	50.09	20.18	22.39	25.02	23.46	25.85	24.91	0,0,0:c1	no-mutants
ZC3H4	13.23	21.91	33.48	39.74	7.52	8.07	7.75	8.94	7.02	9.83	0,0,0:c1	probably-unrelated
PPARGC1A	0.06	0.56	1.28	1.01	1.29	2.17	1.98	1.92	1.11	1.83	0,0,0:c1	probably-unrelated
RGS18	0.59	0.65	2.16	1.58	1.2	1.5	1.83	1.68	1.83	1.44	0,0,0:c1	probably-unrelated
TMEM170B	1.12	1.88	3.25	4.64	1.91	2.82	1.88	1.95	2.74	1.47	0,0,0:c1	no-mutants
CTSB	51.64	57.72	73.21	106.23	67.91	80.74	68.38	70.24	63.47	82.34	0,0,0:c1	probably-unrelated
MFAP2	88.74	227.09	318.97	375.25	194.43	156.82	212.29	222.04	221.32	227.61	0,0,0:c1	probably-unrelated
SQSTM1	43.71	58.55	87.23	115.27	58.91	68.73	67.91	72.35	74.83	64.97	0,0,0:c1	probably-unrelated
NPEPL1	11.53	19.8	28.1	35.01	95.47	105.84	127.68	114.57	96.52	109.29	0,0,0:c1	no-mutants
FBXL17	1.37	2.63	4.04	5	3.48	3.79	4.46	3.44	4.41	3.13	0,0,0:c1	no-mutants
EIF4A2	80.33	60.79	63.18	125.5	171.4	203.57	187.68	184.14	178.31	219.09	0,0,0:c1	no-mutants
NAGLU	1.71	3.11	4.04	5.23	3.22	3.59	3.5	3.75	4.1	3.42	0,0,0:c1	probably-unrelated
FAM117A	8.66	13.99	26.89	25.55	5.14	5.22	5.63	5.24	6.18	6.47	0,0,0:c1	no-mutants
ZFP712	1.47	1.76	3.1	3.43	8.88	11.1	10.1	8.81	9.75	11.76	0,0,0:c1	no-mutants
DYRK2	6.62	9.04	13.8	16.55	3.78	3.59	4.79	4.27	4	4.35	0,0,0:c1	no-mutants
ACOX3	1.4	3.3	5.36	5.61	3.36	4.64	4.56	3.88	4.13	4.09	0,0,0:c1	no-mutants
HBP1	37.89	54.18	70.26	90.33	15.84	20.53	17.43	20.05	20.71	18.15	0,0,0:c1	no-mutants
CCSAP	2.03	3.97	5.53	5.93	7.43	8.87	7.59	7.16	6.56	9.25	0,0,0:c1	no-mutants
STRN	3.02	5.3	8.01	9.04	14.18	14.37	15.46	14.88	16.84	16.47	0,0,0:c1	embryonic lethality, complete penetrance
TNK2	7.8	14.85	22.27	25.86	4.51	4.22	3.8	5.14	4.27	5.18	0,0,0:c1	no-mutants
ZFP551	0.88	2.22	2.19	3.24	23.65	21.7	31.97	29.21	27.16	25.49	0,0,0:c1	no-mutants
TRADD	4.83	5.13	6.59	9.85	6.98	7.02	8	7.32	7.86	8.39	0,0,0:c1	probably-unrelated
CD1D1	2.14	4.64	6.67	8.01	7.29	9.62	8.05	9.21	9.39	9.58	0,0,0:c1	probably-unrelated
PARD6G	19.78	42.25	57.54	67.18	6.02	5.73	7.08	6.44	7.07	7.21	0,0,0:c1	no-mutants
MTMR12	3.9	10.35	13.92	15.85	2.93	3.48	3.17	2.97	3.65	3.56	0,0,0:c1	probably-unrelated
PDLIM2	2.58	4.83	9.2	8.12	11.66	18.41	18.63	15.64	14.64	13.39	0,0,0:c1	probably-unrelated
UBL3	20.31	17.97	26.85	35	5.89	7.13	7.09	6.56	8.4	6.09	0,0,0:c1	no-mutants
CYTH3	11.39	30.64	33.96	38.57	9.09	11.58	10.34	11.62	12.6	10.92	0,0,0:c1	no-mutants
GAK	12.25	18.31	25.75	28.23	7.19	6.95	7.09	7.52	9.45	7.34	0,0,0:c1	embryonic lethality, complete penetrance
NAPEPLD	1.47	2.86	3.62	4.1	7.35	7.3	8.09	7.33	9.18	8.43	0,0,0:c1	probably-unrelated
HSD17B4	28.24	60.89	81.34	86.13	21.68	26.35	26.31	24.42	30.19	25.68	0,0,0:c1	probably-unrelated
FBXO4	1.21	1.52	1.77	2.37	3.97	4.66	4.95	5.16	5.68	5.65	0,0,0:c1	probably-unrelated
OGDHL	4.82	10.66	14.38	14.92	8.67	7.52	8.28	9.26	10.94	10.42	0,0,0:c1	no-mutants
STXBP3	6.06	7.32	8.4	11.71	3.62	6.17	4.62	4.61	5.87	5	0,0,0:c1	embryonic lethality between implantation and somite formation, complete penetrance
MOSPD1	17.35	18	23.61	32.26	2.22	4.13	2.22	3.95	2.7	3.2	0,0,0:c1	probably-unrelated
DYRK1B	6.61	15.45	20.45	18.72	13.75	8.97	12.26	10.57	11.11	16.6	0,0,0:c1	probably-unrelated
DNAJC5	17.77	34.89	42.82	48.46	7.71	9.03	9.69	8.18	10.67	8.83	0,0,0:c1	probably-unrelated
AADAT	0.91	1.05	2.12	0.65	3.9	3.27	4.02	4.86	4.54	5.44	0,0,0:c1	probably-unrelated
RAC3	18.92	27.47	31.36	40.77	21.26	18.61	20.7	21.43	20.82	26.03	0,0,0:c1	probably-unrelated
ZSCAN2	5.73	11.66	17	16.67	38.61	38.07	44.59	37.7	40.84	49.32	0,0,0:c1	probably-unrelated
ZDHHC24	2.35	3.34	4.6	5.49	28.81	21.94	38.67	29.52	24.51	22.68	0,0,0:c1	probably-unrelated
FAM151B	1.81	0.93	1.18	2.17	4.76	5.47	6.97	7.3	6.95	7.05	0,0,0:c1	probably-unrelated
NEK8	1.66	2.16	3.65	3.39	2.14	2.44	2.42	2.06	2.7	2.39	0,0,0:c1	probably-unrelated
LYSMD4	7.28	9.73	12.78	15.9	5.19	6.77	6.49	5.67	7.16	5.93	0,0,0:c1	no-mutants
ARFIP1	16.39	22.74	27.41	34.91	22.17	31.76	26.48	24.07	31.78	25.56	0,0,0:c1	no-mutants
POMK	5.78	8.32	9.61	12.14	9.4	7.97	10.72	8.76	11.74	8.13	0,0,0:c1	probably-unrelated
ERI3	46.37	95.42	114.14	130.61	26.95	35.06	33.57	33.5	37.01	31.24	0,0,0:c1	no-mutants
ASAH1	30.74	35.34	48.41	58.78	6.37	7.53	6.72	8.4	8.49	7.47	0,0,0:c1	embryonic lethality, complete penetrance
IFI35	2.03	1.92	1.68	3.24	3.86	3.76	4.44	4.42	5.12	4.17	0,0,0:c1	no-mutants
FAR1	20.03	24.3	26.44	36.57	31.38	29.63	35.04	29.39	40.22	29.67	0,0,0:c1	no-mutants
IK	65.76	92	132.01	146.99	44.74	58.55	62.92	62.72	62.88	64.13	0,0,0:c1	no-mutants
DEDD	13.29	18.42	22.55	26.86	31.86	25.1	32.23	30.67	31.14	38.67	0,0,0:c1	probably-unrelated
CD2AP	8.79	6.86	10.47	14.37	18.34	22.2	20.42	22.07	26.57	21.7	0,0,0:c1	probably-unrelated
SLC45A4	4.17	7.31	10	10.93	2.68	2.41	2.81	2.9	3.28	2.44	0,0,0:c1	no-mutants
TMEM181A	7.84	11.08	14.24	16.34	7.86	8.3	9.9	8.82	10.11	9.54	0,0,0:c1	probably-unrelated
LAMP2	45.86	50.82	62.26	82.22	16.86	16.05	16.59	17.09	21.31	16.3	0,0,0:c1	probably-unrelated
XKR8	1.87	3	3.69	4.31	6.07	5.59	6.66	7.63	7.59	7.66	0,0,0:c1	no-mutants
FOXP4	26.33	42.91	39.56	58.19	1.67	2.04	2.47	1.45	2.6	1.66	0,0,0:c1	embryonic lethality during organogenesis, incomplete penetrance
ABHD6	4.41	6.23	9.44	9.3	2.05	1.94	1.89	1.81	2.33	2.44	0,0,0:c1	no-mutants
DGCR2	34.34	72.38	88.13	96.26	36.66	29.24	33.77	34.74	37.72	42.96	0,0,0:c1	probably-unrelated
ZFP710	5.37	4.81	7	8.83	14.18	15.59	17.03	16.97	17.88	15	0,0,0:c1	no-mutants
R3HDM4	39.31	78.16	100.22	107.33	19.97	22.1	20.76	22.39	25.15	20.12	0,0,0:c1	no-mutants
CDO1	42.93	131.42	112.94	148.68	25.51	35.77	31.98	27.08	32.98	33.96	0,0,0:c1	abnormal forelimb morphology,abnormal digit morphology
CDH1	10.36	14.35	15.88	20.71	46.72	45.99	49.46	45.6	58.88	41.48	0,0,0:c1	embryonic lethality, complete penetrance,embryonic lethality during organogenesis, complete penetrance,embryonic lethality before implantation, complete penetrance,embryonic lethality between implantation and somite formation, complete penetrance
SPOP	36.01	39.35	53.81	65.07	9.24	11.05	10.35	10.1	11.98	9.79	0,0,0:c1	brachydactyly,abnormal femur morphology
GPHN	6.35	7.79	10.13	12.28	12.37	11	11.91	12.39	11.86	14.48	0,0,0:c1	probably-unrelated
SPPL3	29.16	54.65	69.62	77.3	22.07	19.63	23.76	22.19	25.76	21.89	0,0,0:c1	probably-unrelated
FAM43A	3.2	9.14	8.81	10.79	1.51	1.93	2.08	2.12	1.66	2.15	0,0,0:c1	no-mutants
SCYL1	21.38	24.31	33.2	38.46	48.8	40.12	50.1	52.79	41.38	55.3	0,0,0:c1	abnormal pelvic girdle bone morphology,hindlimb paralysis
RNH1	36.34	49.42	61.12	73.69	12.61	10.39	13.27	11.59	12.38	14.02	0,0,0:c1	no-mutants
TAX1BP3	56.38	110	139.52	151.77	41.28	57.6	54.13	51.3	52.31	44.43	0,0,0:c1	no-mutants
OCLN	0.47	1.27	1.3	1.6	21.38	26.57	22.93	23.36	25.22	20.86	0,0,0:c1	abnormal femur morphology
CCNYL1	10.92	20.71	23.77	28.09	5.78	5.04	5.45	5.16	5.94	6.51	0,0,0:c1	probably-unrelated
BBX	3.87	2.31	3.53	5.12	2.67	2.93	3.63	3.27	2.76	2.96	0,0,0:c1	probably-unrelated
MIB1	8.11	11.21	17.07	18.11	29.17	25.45	29.58	27.13	27.29	33.67	0,0,0:c1	syndactyly,abnormal interdigital cell death,embryonic lethality during organogenesis, complete penetrance,embryonic lethality,fused phalanges,abnormal digit development
CENPC1	10.44	9.59	14.78	18.35	2.34	2.36	2.8	2.75	1.82	2.85	0,0,0:c1	embryonic lethality, complete penetrance
TES	50.99	86.18	109.03	121.24	31.45	30.51	29.74	30.57	33.54	35.76	0,0,0:c1	probably-unrelated
HSPA13	28.86	29.13	41.29	49.76	8.3	5.28	8.18	8.48	6.7	8.3	0,0,0:c1	no-mutants
DECR2	7.92	12.55	14.46	18.47	24.79	30.32	29.6	30.66	26.79	24.49	0,0,0:c1	no-mutants
BORCS6	5.11	7.65	10.15	12.09	11.19	16.46	14.04	11.89	13.78	12.2	0,0,0:c1	no-mutants
FAM219B	6.95	5.67	7.91	10.76	7.64	7.89	7.05	8.23	9.15	8.56	0,0,0:c1	no-mutants
ZER1	5.6	10.14	15.75	15.58	12.32	10.59	12.95	12.47	11.58	14.37	0,0,0:c1	no-mutants
TMEM184C	12.7	15.4	17.89	23.69	9.38	10.15	10.69	9.42	12.01	8.24	0,0,0:c1	no-mutants
PIK3R4	5.59	9.54	12.67	14.53	86.4	86.89	106.38	93.22	106.19	89.47	0,0,0:c1	embryonic lethality, complete penetrance
ETFDH	13.34	23.25	26.6	33.86	10.87	11.01	10.99	11.32	11.85	12.31	0,0,0:c1	probably-unrelated
COG5	10.49	12.31	16.37	20	6.57	6.68	6.51	6.3	8.12	7.03	0,0,0:c1	no-mutants
NUDT13	1.79	2.96	4	4.47	9.77	9.77	10.08	12.11	9.24	10.82	0,0,0:c1	no-mutants
ZFP628	4.19	7.1	9.74	10.72	61.62	45.3	58.03	55.8	43.09	73.43	0,0,0:c1	no-mutants
CAPN5	2.4	3.13	4.26	5.16	18.89	17.5	18.2	18.46	17.98	21.17	0,0,0:c1	embryonic lethality before implantation, complete penetrance
H1FX	73.63	156.1	247.76	189	476.64	519.24	618.72	558.64	586.45	554.64	0,0,0:c1	probably-unrelated
HMGN3	38.51	71.82	93.3	114.08	194.08	303.37	292.41	294.1	304.57	272.41	0,0,0:c1	probably-unrelated
PLA2G15	4.66	9.33	11.54	13.86	3.03	2.65	2.61	2.36	3.07	3.62	0,0,0:c1	probably-unrelated
DHTKD1	0.59	0.94	1.33	1.56	109.17	82.47	112.34	102.77	119.8	130.07	0,0,0:c1	no-mutants
LIPE	2.68	4.39	4.84	6.54	9.76	8.48	11.11	10.31	8.46	11.74	0,0,0:c1	probably-unrelated
PDLIM4	32.87	60.28	97	93.2	15.52	20.83	24.43	27.12	20.02	18.15	0,0,0:c1	no-mutants
RIPK4	3.79	4.85	4.68	7.46	5.7	6.35	7.47	6.43	7.44	7.42	0,0,0:c1	short limbs,interdigital webbing,abnormal hindlimb morphology,abnormal tail morphology
MBTPS1	40.38	83.96	109.47	125.47	29.89	25.39	32.83	30.7	32.15	36.04	0,0,0:c1	embryonic lethality at implantation, complete penetrance,abnormal limb morphology
TVP23A	4.22	8.24	13.4	15.43	1.34	3.22	2.01	2.56	2.23	1.84	0,0,0:c1	no-mutants
HERPUD2	8.91	12.34	15.93	20.64	22.68	25.35	29.2	27.45	29.87	28.46	0,0,0:c1	no-mutants
BCL2L1	20.49	34.4	53.69	56.85	13.67	16.5	18.1	17.12	15.84	18.32	0,0,0:c1	probably-unrelated
PEA15A	29.64	41.46	51.57	70.03	77.61	120.41	129.98	123.62	105.19	130.88	0,0,0:c1	probably-unrelated
STARD5	4.62	9.01	12.66	14.08	4.51	6.06	6.5	5.24	6.24	6.26	0,0,0:c1	probably-unrelated
TSC22D1	182.71	331.64	375.61	498.47	24.99	28.3	29.62	28.18	34.32	31.24	0,0,0:c1	probably-unrelated
USP20	1.6	3.22	4.31	5.08	30.41	39.32	43.63	41.43	44.95	40.1	0,0,0:c1	probably-unrelated
ARHGAP33	1.44	3.8	6.54	5.51	1140.24	1787.7	1981.87	1973.39	1729.77	1742.31	0,0,0:c1	probably-unrelated
ALOX5AP	1.62	4.65	8.64	8.46	0.43	1.64	1.18	1.31	0.91	1.05	0,0,0:c1	probably-unrelated
ZYX	37.15	80.61	91.44	119.41	193.46	182.57	215.16	232.48	180.12	249.88	0,0,0:c1	probably-unrelated
SIRT5	4.95	13.71	19.29	20.6	47.21	59.18	60.69	60.14	60.84	66.33	0,0,0:c1	probably-unrelated
LASP1	28.5	76.43	113.67	125.89	40.66	49.48	51.55	50.08	57.98	43.67	0,0,0:c1	abnormal tail morphology
GAS2L3	1.83	2.95	4.47	5.01	2.04	2.17	2.3	2.61	2.46	2.66	0,0,0:c1	probably-unrelated
KEAP1	13	22.19	29.78	36.27	7.36	8.74	9.66	8.95	10.43	10.11	0,0,0:c1	probably-unrelated
SLC30A1	2.56	3.54	5.05	6.07	8.83	8.24	10.71	10.55	11.41	10.9	0,0,0:c1	embryonic lethality during organogenesis, complete penetrance
CYFIP1	14.55	25.64	35.35	42.51	2.52	2.27	3.29	2.82	1.03	3.4	0,0,0:c1	embryonic lethality, complete penetrance,embryonic lethality between somite formation and embryo turning, complete penetrance
GPX7	26.3	48.8	57.12	68.54	34.79	45.32	47.23	43.03	49.6	45.83	0,0,0:c1	probably-unrelated
PRDX5	103.55	117.31	129.57	181.28	167.13	234.54	254.9	264.41	204.44	271.43	0,0,0:c1	no-mutants
RNF167	21.1	34.15	39.02	48.6	10.06	10.83	12.86	12.8	10.63	14.09	0,0,0:c1	no-mutants
ACVRL1	2.85	5.14	6.72	7.5	21.34	18.81	19.85	20.37	25.87	23.42	0,0,0:c1	embryonic lethality during organogenesis, complete penetrance
MMP2	46.11	141.24	186.81	189.02	79.87	67.35	76.01	86.5	95.66	101.39	0,0,0:c1	embryonic lethality during organogenesis, complete penetrance
PPP1R37	13.06	17.84	23.16	29.91	15.4	11.23	20.05	16.37	18.29	19.8	0,0,0:c1	no-mutants
MMAA	3.85	4.48	6.2	7.8	4.55	6.1	4.78	5.69	6.01	6.35	0,0,0:c1	no-mutants
RAB10	29.46	67.07	76.75	97.1	39.23	54.81	53.17	49.35	60.15	48.18	0,0,0:c1	no-mutants
ATP6AP1	33.1	50.26	61.21	77.14	88.36	63.31	97.72	92.56	83.12	107.36	0,0,0:c1	probably-unrelated
NMNAT3	1.3	1.39	2.42	2.61	1.77	2.71	2.13	2.37	2.51	2.47	0,0,0:c1	probably-unrelated
PLEKHA8	7.51	15.5	23.01	22.12	65.78	56.38	97.49	81.05	88.01	48.2	0,0,0:c1	probably-unrelated
TTPAL	9.01	18.28	25.31	30.2	1.24	2.5	1.82	2	2.2	1.52	0,0,0:c1	no-mutants
NFATC3	12.79	23	31.73	35.3	22.63	23	28.21	27.71	29.93	30.23	0,0,0:c1	embryonic lethality during organogenesis, complete penetrance,embryonic lethality during organogenesis, incomplete penetrance
KLF10	4.63	8.35	12.71	13.65	7.23	8.44	12.22	10.17	9.63	8.98	0,0,0:c1	abnormal tibia morphology
ERLEC1	6.37	7.07	10.03	12.7	15.01	15.34	15.45	16.13	19.11	17.35	0,0,0:c1	no-mutants
DCX	0.84	6.72	5.94	8.17	33.46	45.91	59.49	60.46	50.41	42.85	0,0,0:c1	probably-unrelated
RAB11B	21.47	40.4	55.05	61.49	50.1	57.32	65.14	64.14	60.74	68.18	0,0,0:c1	no-mutants
TWSG1	18.62	47.84	61.97	72	49.27	40.35	46.76	49.05	51.74	59.42	0,0,0:c1	hindlimb paralysis,abnormal tail morphology,abnormal limb bone morphology
NECAP2	19.7	31.52	42.01	47.48	13.44	14.65	14.82	14.81	15.79	16.5	0,0,0:c1	no-mutants
ITPR3	0.82	2.17	3.5	3.13	4.37	5.28	5.55	4.03	5.88	4.04	0,0,0:c1	probably-unrelated
SND1	48.24	68.46	92.42	107.42	75.31	62.32	82.28	75.26	79.55	90.41	0,0,0:c1	no-mutants
FKBP1B	3.69	6.67	8.54	9.56	179.35	215.08	235.35	204.01	239.65	210.98	0,0,0:c1	probably-unrelated
ACACB	0.49	0.74	1.24	1.19	1.45	1.34	1.31	1.84	1.38	1.5	0,0,0:c1	probably-unrelated
PFKM	13.36	28.33	41.07	46.89	11.35	6.44	13.61	13.41	3.77	11.31	0,0,0:c1	probably-unrelated
SLC39A1	32.55	54.05	66.59	80.93	32.25	21.81	30.75	27.88	30.06	36.75	0,0,0:c1	abnormal limb development
CFAP97	5.81	8.78	11.46	14.21	11.55	10.75	12.33	12.87	11.62	13.84	0,0,0:c1	no-mutants
SLC17A5	2.17	4.6	5.44	6.51	10.24	12.27	11.94	12.77	13	10.44	0,0,0:c1	probably-unrelated
ARRDC1	3.01	4.06	4.84	6.51	4.82	6.02	5.34	5.1	6.64	5.4	0,0,0:c1	probably-unrelated
SIL1	7.42	8.72	11.54	14.94	5.4	4.65	5.47	5.2	5.26	6.24	0,0,0:c1	probably-unrelated
VEGFC	4.96	7.31	7.69	10.88	7.47	5.44	6.23	6.24	6.65	8.07	0,0,0:c1	probably-unrelated
DPYSL4	3.7	13.55	19.25	15.21	54.26	53.07	71.69	68.12	70.56	48.29	0,0,0:c1	probably-unrelated
STAT5B	4.32	9.06	10.39	12.8	13.31	13.29	16.29	15.93	16.17	16.82	0,0,0:c1	probably-unrelated
SEC22C	2.88	4.82	6.92	7.44	3.3	3.15	4.33	3.47	3.43	3.93	0,0,0:c1	no-mutants
HIST1H2BE	0.99	1.6	2.66	2.46	0.95	1.2	1.14	1.4	0.98	1.07	0,0,0:c1	no-mutants
VPS37C	9.85	14.52	19.14	23.06	9.48	9.07	10.45	8.57	8.62	11.98	0,0,0:c1	no-mutants
CHPT1	7.96	9.12	13.29	16.38	28.32	31.9	31.91	30.99	33.75	29.81	0,0,0:c1	no-mutants
C87436	3.52	5.8	6.97	9.02	3.69	3.62	3.64	3.59	3.96	4.16	0,0,0:c1	no-mutants
ESRP1	7.96	8.65	10.36	15.28	5.42	5.83	5.43	4.69	6.73	4.62	0,0,0:c1	short limbs,abnormal forelimb morphology,syndactyly
BACH1	10.84	19.27	26.41	30.96	3.74	4.76	4.99	4.14	4.41	3.58	0,0,0:c1	probably-unrelated
N4BP3	8.1	10.58	12.57	19.15	7.19	6.03	9.03	6.48	7.57	6.08	0,0,0:c1	no-mutants
XPR1	3.18	10.53	11.17	13.2	2.79	2.49	3.33	2.92	2.92	3.13	0,0,0:c1	probably-unrelated
RSPH3B	8.15	16.96	21.79	24.03	1.15	1.4	1.01	1.18	1.48	1.37	0,0,0:c1	no-mutants
ASAP2	5.22	11.03	16.08	15.08	8.62	7.42	7.49	7.93	9.64	8.92	0,0,0:c1	no-mutants
VTI1A	4.44	6.69	8.8	10.37	13.46	12.52	13.35	13.99	15.47	14.92	0,0,0:c1	probably-unrelated
GLRX	9.39	20.06	25.31	29.03	215.32	308.07	321.97	320.24	260.01	256.75	0,0,0:c1	probably-unrelated
SMAP2	10.4	16.2	20.16	25.6	9.11	8.43	12.48	11.33	9.55	8.52	0,0,0:c1	probably-unrelated
LSM11	2.88	3.88	5.91	6.8	6.6	7.34	8.43	7.47	8.62	6.95	0,0,0:c1	probably-unrelated
KLHL11	3.58	5.91	9.32	10.68	3.79	3.13	4.93	3.81	3.01	3.6	0,0,0:c1	no-mutants
TMED8	1.57	2.41	3.1	3.74	11.87	11.53	10.89	11.33	11.24	13.66	0,0,0:c1	no-mutants
SELENOO	4.88	5.39	7.61	9.54	13.76	15.05	17.23	15.77	16.13	15.59	0,0,0:c1	no-mutants
ZKSCAN3	17.73	23.16	27.34	36.4	3.19	2.67	3.04	3.23	3.1	3.52	0,0,0:c1	no-mutants
SOX4	26.54	54.33	96.28	97.89	235.1	278.92	290.74	312.43	211.78	227.63	0,0,0:c1	probably-unrelated
AW554918	3.15	5.26	6.93	8.8	4.96	5.12	5.88	5.76	6.34	5.13	0,0,0:c1	no-mutants
RIC1	6.32	9.77	15.16	16.97	4.27	3.61	4.15	3.71	4.49	4.93	0,0,0:c1	probably-unrelated
TMF1	1.42	0.76	1.62	2.45	6.04	7.28	9.89	9.46	6.95	6.99	0,0,0:c1	probably-unrelated
SUMF1	8.63	8.73	13.17	17.48	7.38	5.29	8.09	7.35	6.71	8.52	0,0,0:c1	short limbs
CTTNBP2NL	10.46	19.9	32.99	34.55	3.92	4.55	5.53	5.05	4.52	3.84	0,0,0:c1	no-mutants
PIP5K1C	15.04	22.27	32.99	39.65	1.75	2.58	2.39	1.92	2.22	2.25	0,0,0:c1	embryonic lethality during organogenesis, complete penetrance
ISL1	0.43	0.74	1.37	1.08	0.71	0.96	0.95	1.12	1.26	0.48	0,0,0:c1	absent hindlimb,embryonic lethality, complete penetrance,oligodactyly,abnormal hindlimb zeugopod morphology,embryonic lethality during organogenesis, complete penetrance,abnormal hindlimb bud morphology
RSBN1	4.48	8.99	13.42	14.32	3.65	3.69	4.55	3.81	3.79	4.35	0,0,0:c1	probably-unrelated
EVI5	8.4	12.27	18.29	20.14	9.12	9.44	9.63	9.45	10.83	10.22	0,0,0:c1	probably-unrelated
SDR39U1	13.27	22.78	30.39	39.47	10.37	8.97	12.56	10.6	6.97	12.51	0,0,0:c1	no-mutants
SNX24	4.25	9.17	11.65	14.32	5.19	7.59	7.26	6.79	7.21	5.35	0,0,0:c1	no-mutants
MFN2	8.12	12.68	13.98	19	23.4	20.42	18.63	21.36	22.45	26.53	0,0,0:c1	embryonic lethality during organogenesis, incomplete penetrance
CIRBP	33.16	37.17	73.93	58.44	1198	1554	1609.28	1543.9	1518.4	1304.33	0,0,0:c1	probably-unrelated
GAN	1.17	1.03	2.29	2.09	2.33	3.38	3.85	3.06	3.62	2.92	0,0,0:c1	probably-unrelated
ZKSCAN8	2.9	5.29	6.86	8.2	14.7	15.59	16.41	17.11	18.36	18.1	0,0,0:c1	no-mutants
PGPEP1	6.32	14.41	18.74	22.39	9.22	11.24	12.06	11.29	12.26	10.57	0,0,0:c1	no-mutants
TTL	7.55	14.79	18.06	22.63	9.29	8.61	9.77	9.31	8.68	11.18	0,0,0:c1	probably-unrelated
TBC1D5	3.29	5.82	8.3	9.19	10.27	12.72	14.62	12.4	13.67	11.29	0,0,0:c1	no-mutants
MOB3A	15.22	26.11	34.75	37.59	1.79	3.72	3.49	3.8	4.52	3.62	0,0,0:c1	no-mutants
DHX32	6.11	8.95	10.83	11.59	0.44	1.16	0.81	1.61	0.86	0.18	0,0,0:c1	no-mutants
PLIN2	41.05	54.35	66.76	76.42	10.54	13.37	25.9	20.14	19.94	15.43	0,0,0:c1	probably-unrelated
PCYT1A	11.69	29.28	30.53	33.9	10.19	11.34	15.16	14.07	15.07	17.29	0,0,0:c1	embryonic lethality before implantation, complete penetrance
MIGA1	4.59	9.23	10.25	10.74	0.77	0.75	1.67	0.9	1.07	1.08	0,0,0:c1	probably-unrelated
FLI1	6.23	13.46	17.62	14.38	20.33	24.48	24.09	27.88	36.27	25.96	0,0,0:c1	embryonic lethality during organogenesis, complete penetrance
PROM1	13.24	31.67	35.75	31.51	4.71	3.97	3.88	5.74	6.78	6.36	0,0,0:c1	probably-unrelated
ERGIC1	71.65	121.22	138.02	157.74	11.2	10.25	11.03	10.74	15.44	13.25	0,0,0:c1	no-mutants
LRP3	8.69	14.33	15.79	17.67	14.42	10.99	14.91	14.98	15.18	19.69	0,0,0:c1	no-mutants
LHX9	35.43	60.75	72.02	60.31	34.39	28.66	84.92	68.87	68.77	46.13	0,0,0:c1	probably-unrelated
MYL12B	130.93	157.59	218.26	240.89	152.22	233.98	237.71	241.43	280.06	296.12	0,0,0:c1	probably-unrelated
SLITRK6	2.44	10.59	12.26	10.62	3.41	4.53	5.71	6.14	6.74	6.65	0,0,0:c1	probably-unrelated
TMEM19	7.01	14.85	18.13	18.01	2.95	2.24	3.23	3.27	3.99	3.68	0,0,0:c1	no-mutants
LHFP	18.02	60.45	45.12	59.92	8.54	7.91	13.97	11.55	11.3	13.18	0,0,0:c1	no-mutants
TPK1	2.49	3.69	4.67	5.14	11.25	17.46	22.28	24.05	22.08	15.07	0,0,0:c1	no-mutants
RAB36	1.22	2.84	3.4	3.24	1.09	2.11	1.99	1.89	2.28	2.06	0,0,0:c1	probably-unrelated
PIGV	4.52	6.87	7.5	8.55	2.45	1.97	2.36	2.13	2.54	3.18	0,0,0:c1	probably-unrelated
GSTA4	53.96	90.54	138.17	124.18	9.74	25.18	23.22	26.3	22.8	22.03	0,0,0:c1	probably-unrelated
AURKB	64.65	96.39	90.93	78.77	4.4	9.47	2.77	13.68	5.39	2.64	0,0,0:c1	embryonic lethality
MYL6	902.23	1013.59	1181.69	1465.03	1570.93	1650.07	1549.44	2509.85	1800.49	2035.6	0,0,0:c1	no-mutants
SHC1	31.21	56.29	66.85	69.66	0.99	0.9	1.28	1.12	0.86	1.48	0,0,0:c1	embryonic lethality during organogenesis, complete penetrance,embryonic lethality during organogenesis, incomplete penetrance
HTATIP2	3.99	3.07	4.26	5.78	10.27	10.9	11.66	10.6	13.47	14.21	0,0,0:c1	probably-unrelated
TBC1D10A	8.65	13.15	15.8	18.11	11.32	15.2	16.92	17.39	18.99	19.35	0,0,0:c1	probably-unrelated
LMO4	49.18	88.58	134.85	124.63	5	11.75	13.38	5.21	10.04	0.24	0,0,0:c1	probably-unrelated
PDIA4	158.76	139.77	151.9	220.87	81.87	76.69	94.15	91.36	118.46	93.83	0,0,0:c1	probably-unrelated
GLCE	15.98	15.05	18.56	25.38	13.42	17.68	20.99	17.67	23.98	22.75	0,0,0:c1	polydactyly,abnormal phalanx morphology
MPST	26.27	33.44	43.41	47.17	11.75	15.63	17.93	18.38	19.54	20.78	0,0,0:c1	probably-unrelated
SEPSECS	3.18	2.75	3.31	4.52	4.51	5.38	5.72	5.94	7.77	6.05	0,0,0:c1	no-mutants
CBL	4.92	8.63	11.26	10.92	10.46	17.1	27.84	22.97	18.75	18.5	0,0,0:c1	probably-unrelated
MTDH	38.51	44.7	57.18	64.67	36.19	27.37	31.76	30.42	33.97	44.62	0,0,0:c1	probably-unrelated
TMEM42	7.18	6.78	8.6	11.09	8.99	13.98	15.21	14.38	18.64	12.33	0,0,0:c1	probably-unrelated
MPZL2	8.45	14.39	13.68	17.19	12.37	10.37	15.1	16.69	15.29	17.61	0,0,0:c1	probably-unrelated
LIMS1	25.49	38.81	43.87	56.92	12.23	16.59	16.57	17	19.96	16.68	0,0,0:c1	embryonic lethality before implantation, complete penetrance,embryonic lethality between implantation and somite formation, complete penetrance
SMIM24	1.41	2.81	4.19	3.05	3.39	2.24	5.22	3.44	2.4	3.33	0,0,0:c1	no-mutants
LYSMD2	8.28	8.51	10.44	14.21	7.09	6.65	7.52	7.07	8.21	9.16	0,0,0:c1	no-mutants
SERTAD4	16.92	46.76	59.76	61.09	21.7	27.9	28.72	29.3	33.23	26.83	0,0,0:c1	no-mutants
GDI1	25.23	49.7	55.85	66.84	22.34	20.28	22.77	22.32	28.04	24.41	0,0,0:c1	probably-unrelated
NCSTN	23.3	32.87	43.37	49.76	70.48	49.54	59.48	68.32	64.45	83.55	0,0,0:c1	embryonic lethality, complete penetrance,embryonic lethality during organogenesis, complete penetrance
CNN3	308.6	449.04	532.34	652.29	87.26	103.43	96.57	101.84	120.72	118.27	0,0,0:c1	probably-unrelated
SLC9A3R2	8.04	23.85	29.28	32.57	7.92	7.75	9.6	10.18	10.86	9.61	0,0,0:c1	no-mutants
TXNDC15	25.11	45.43	54.04	61.56	28.02	31.18	35.78	36.17	38.74	35.77	0,0,0:c1	no-mutants
LAPTM4A	225.92	258.99	302.39	396.01	53.08	61.97	61.47	63.84	71.03	68.33	0,0,0:c1	probably-unrelated
MPC2	42.37	57.94	76.52	94.7	55.58	91.91	95.67	96.1	98.38	100.04	0,0,0:c1	no-mutants
UPRT	2.59	2.74	3.13	4.45	15.36	22.71	21.63	21.73	23.3	23.53	0,0,0:c1	no-mutants
ATG10	4.81	4.16	7.56	9.13	7.27	13.56	12.34	10.22	14.9	8.53	0,0,0:c1	no-mutants
AMACR	6.56	7.6	7.9	11.06	6.91	10.09	9.91	10.64	11.04	9.84	0,0,0:c1	probably-unrelated
SPRYD3	5.12	5.65	7.2	8.76	3.64	3.33	2.81	4.72	3.71	3.91	0,0,0:c1	probably-unrelated
STX16	8.5	11.98	12.99	16.53	4.68	5.45	5.8	5.68	6.46	6.67	0,0,0:c1	probably-unrelated
RNF13	12.79	11.62	15.93	20.19	8.55	10.5	10.82	11.77	13.14	13.68	0,0,0:c1	abnormal limb position,abnormal hindlimb morphology
RIMKLB	16.44	19.64	25.02	25.92	1.12	1.13	1.76	1.56	0.08	1.8	0,0,0:c1	probably-unrelated
CDC42EP4	30.9	90.68	109.3	104.65	7.61	10.03	10.97	10.48	11.82	10.66	0,0,0:c1	probably-unrelated
BORCS5	4.33	7.83	10.3	11.01	2.39	6.54	5.66	5.9	6.83	4.67	0,0,0:c1	no-mutants
SHISA3	6.11	4.18	5.27	7.67	0.77	0.87	0.49	1.2	0.5	0.72	0,0,0:c1	probably-unrelated
VPS37B	9.59	17.97	24.9	24.77	21.07	28.01	29.24	25.48	33.18	23.68	0,0,0:c1	no-mutants
PHLDA1	15.45	12.55	15.5	22.8	15.52	25.65	29.33	30.4	25.2	28.54	0,0,0:c1	no-mutants
PSME1	65.16	90.65	124.51	126.76	64.43	36.48	34.46	71.87	68.12	78.96	0,0,0:c1	no-mutants
METAP1D	7.38	8.25	10.27	12.37	2.05	1.73	1.45	2.54	1.44	1.98	0,0,0:c1	no-mutants
CNPY3	19.71	31.03	32.5	41.03	10.05	9.36	12.61	11.09	13.83	12.64	0,0,0:c1	probably-unrelated
TMEM109	28.07	45.75	49.17	60.64	45.32	28.02	39.1	40.66	43.11	55.64	0,0,0:c1	probably-unrelated
DRAM2	11.29	10.4	12.23	17.18	3.48	4.22	4.91	5.11	5.78	5.6	0,0,0:c1	no-mutants
SYVN1	11.69	14.42	17.25	21.25	18.18	10.05	15.39	14.72	15.91	20.45	0,0,0:c1	probably-unrelated
HS2ST1	19.54	29.75	35.6	43.25	33.45	38.76	39.22	39.7	48.27	37.58	0,0,0:c1	polydactyly
AI661453	2.59	1.7	2.35	3.61	6.82	11.97	11.75	13.84	14.39	10.62	0,0,0:c1	no-mutants
SLC25A12	8.42	15.36	19.89	21	11.82	16.64	15.92	16.85	18.56	17.95	0,0,0:c1	probably-unrelated
STX5A	28.6	50.04	56.7	68.59	36.72	26.93	33.4	34.73	35.02	46.03	0,0,0:c1	no-mutants
FAM168B	42.01	89.88	115.86	121.84	21.28	23.62	25.74	24.3	30.63	23.78	0,0,0:c1	no-mutants
UBALD1	22.7	32.99	36.82	48.97	15.95	20.79	20.01	21.87	26.91	22.95	0,0,0:c1	no-mutants
RALB	33.1	38.13	44.97	64.45	13.4	15.66	16.47	14.99	20.95	15.6	0,0,0:c1	probably-unrelated
EML4	26.38	41.21	53.67	60.24	11.26	12.04	13.38	13.83	16.39	14.97	0,0,0:c1	no-mutants
TMEM135	5.56	7.62	9.59	11.46	7.19	7.9	7.94	9.9	8.93	10.95	0,0,0:c1	no-mutants
NCF4	2.11	1.36	3.68	2.4	5.09	6.96	5.6	8	9.94	8.21	0,0,0:c1	embryonic lethality during organogenesis, incomplete penetrance
SYNGR2	10.61	15.7	20.35	25.05	12.12	14.09	19.12	17.31	20.35	19.71	0,0,0:c1	no-mutants
ABI1	15.55	24.82	29.49	36.2	29.78	34.28	34.45	35.84	45.12	45.45	0,0,0:c1	embryonic lethality, complete penetrance,embryonic lethality during organogenesis, complete penetrance
WRNIP1	10.71	15.36	21.4	23.62	5.45	6	6.71	8.01	6.5	8.75	0,0,0:c1	probably-unrelated
GMDS	13.41	15.89	23.42	27.72	0.97	1.17	1.37	1.66	1.56	1.17	0,0,0:c1	probably-unrelated
VPS41	19.8	35.94	44.92	49.85	13.24	12.45	17.2	15.47	17.2	19.81	0,0,0:c1	embryonic lethality between somite formation and embryo turning, complete penetrance
FAM122B	3.1	5.62	6.44	7.7	5.78	4.25	5.73	5.85	5.08	7.61	0,0,0:c1	probably-unrelated
PML	4.33	9.41	13.64	14.34	7.05	20.16	15.06	17.15	19.83	19.69	0,0,0:c1	probably-unrelated
TRPT1	2.38	3.55	5.66	5.88	10.44	9.34	5.93	16.76	11.06	9.15	0,0,0:c1	no-mutants
EFNB1	12.58	52.92	79.82	73.27	7.65	7.94	9.96	11.04	12.04	10.22	0,0,0:c1	polydactyly,abnormal autopod morphology,preaxial polydactyly,polysyndactyly
GPR137	7.59	13.61	13.88	17.62	7.62	4.96	7.45	7.28	7.59	10.12	0,0,0:c1	no-mutants
TOM1L1	8.79	8.93	11.13	14.67	2.52	2.7	3.81	4.42	4.08	3.14	0,0,0:c1	no-mutants
SWAP70	10.65	11.15	14.47	17.88	3.13	4.48	6.55	6.51	6.83	6.91	0,0,0:c1	probably-unrelated
COX20	56.08	72.66	80.41	108.38	1.35	1.18	2.49	1.3	1.63	1.08	0,0,0:c1	no-mutants
XIAP	14.35	18.57	22.47	29.05	1.08	2.02	1.56	1.72	2.51	1.52	0,0,0:c1	embryonic lethality during organogenesis, complete penetrance
TBL1X	26.55	47.08	56.82	63.41	0.72	1.09	0.6	1.63	0.81	0.42	0,0,0:c1	no-mutants
RBSN	7.6	14.19	19.03	22	16.1	29.71	41.66	17.71	30.26	20.56	0,0,0:c1	probably-unrelated
MAN1B1	23.44	32.77	40.79	48.02	5.47	6.07	5.74	6.48	7.28	8.56	0,0,0:c1	no-mutants
PTTG1IP	32.7	46.1	54.86	69.04	7.33	11.31	10.64	11.7	14.88	13.07	0,0,0:c1	no-mutants
PLXNA2	4.44	3.22	3.03	6.01	5.28	3.67	4.36	5.11	5.97	6.38	0,0,0:c1	probably-unrelated
ADAM9	7.9	12.25	12.98	17.43	5.68	4.68	5.09	5.43	5.99	7.89	0,0,0:c1	probably-unrelated
STX12	25.02	40.32	51.08	58.69	11.46	15.88	15.88	16.49	18.96	18.9	0,0,0:c1	no-mutants
SERINC3	26.32	44.08	62.51	64.05	10.34	17.8	16.56	17.37	20.09	19.05	0,0,0:c1	probably-unrelated
D10JHU81E	34.85	39.69	58.18	68.58	155.98	266.45	167.96	331.03	156.52	142.54	0,0,0:c1	no-mutants
AKT2	43.98	68.28	77.98	95.08	9.63	10.9	13.16	11.82	13.42	14.71	0,0,0:c1	probably-unrelated
ZC3H14	36.23	49.87	59.49	68.04	28.15	23.09	24.96	29.68	31.61	38.06	0,0,0:c1	probably-unrelated
TMEM259	23.56	38.21	44.46	50.9	4.99	3.47	5.48	2.65	6.47	5.29	0,0,0:c1	probably-unrelated
VOPP1	14.11	31.46	39.47	43.51	16.38	20.41	23.33	24.93	27.76	25.5	0,0,0:c1	no-mutants
SGK3	4.71	6	7.44	9.18	2.16	3.43	3.68	3.47	4.37	3.37	0,0,0:c1	probably-unrelated
TTC26	5.45	10.93	12.13	11.5	0	1.41	0.59	1.1	0.77	0.56	0,0,0:c1	polydactyly,preaxial polydactyly
ACAP3	3.11	7.2	9.38	9.37	34.94	52.24	58.57	61.64	59.43	62.95	0,0,0:c1	probably-unrelated
SRF	12.6	19.63	22.27	25.54	3.93	3.4	4.56	3.39	3.98	5.39	0,0,0:c1	embryonic lethality, complete penetrance,embryonic lethality during organogenesis, complete penetrance
FGD6	1.65	2.14	3.84	3.72	8.1	7.57	7.52	8.06	10.26	10.66	0,0,0:c1	no-mutants
ZRANB1	9.38	18.47	24.64	27.48	22.93	21.87	25.82	25.84	25.62	30.56	0,0,0:c1	polydactyly
ZFAND4	1.82	2.33	3.57	4.31	7.25	8.13	11.87	8.34	11.29	9.06	0,0,0:c1	no-mutants
SH2D3C	3.67	8.76	10.63	12.65	4.26	3.67	3.92	4.51	4.21	5.47	0,0,0:c1	probably-unrelated
MAD1L1	12.38	15.89	24.99	27.27	1.19	0.56	0.91	1.13	1.12	1.31	0,0,0:c1	probably-unrelated
TESK1	9.68	21.65	33.34	33.63	14.8	16.62	16.28	17.89	20.98	17.62	0,0,0:c1	no-mutants
SLC30A7	3.58	6.95	9.03	10.14	15.59	17.74	18.22	16.37	21.38	18.88	0,0,0:c1	probably-unrelated
CYB561	2.11	5.72	4.77	7.03	2.38	2.44	2.54	2.25	3.22	2.67	0,0,0:c1	probably-unrelated
ANKRD46	24.18	52.09	59.2	71.98	23.21	32.97	38.1	37.71	36.51	36.62	0,0,0:c1	no-mutants
TNRC6A	6.73	6.68	14.67	15.76	0.93	0.61	0.96	0.17	1.03	0.6	0,0,0:c1	embryonic lethality during organogenesis, complete penetrance,embryonic lethality during organogenesis, incomplete penetrance
CANT1	12.33	21.1	23.99	31.21	5.98	6.3	7.22	6.1	8.27	6.47	0,0,0:c1	probably-unrelated
PPIC	132.59	131.74	173.95	222.59	2.77	2.2	2.97	3.14	3.46	3.51	0,0,0:c1	no-mutants
GOSR1	6.22	9.47	12.71	15.31	7.92	10.65	11.24	9.83	12.63	9.45	0,0,0:c1	no-mutants
ICK	6.95	14.04	19.27	20.89	6.59	7.68	7.33	7.04	9.02	6.54	0,0,0:c1	abnormal long bone morphology,preaxial polydactyly,short limbs,abnormal ulna morphology,abnormal digit development
SESN1	13.44	16.71	25.49	29.7	1.38	1.16	2.18	1.52	1.85	1.06	0,0,0:c1	probably-unrelated
CST3	155.97	218.2	269.58	325.93	115.39	158.7	182.57	199.75	153.01	175.6	0,0,0:c1	probably-unrelated
GLRB	3.77	9.51	11.06	13.41	0.97	1.8	1.69	2.02	2.01	1.61	0,0,0:c1	probably-unrelated
TM7SF3	9.1	14.47	17.07	21.81	12.01	10.92	13.69	13.8	16.65	14.91	0,0,0:c1	no-mutants
PLSCR3	17.92	43.72	57.19	61.55	23.62	21.22	26.71	27.16	26.89	32.98	0,0,0:c1	probably-unrelated
TMEM50B	6.6	12.96	16	19.96	10.3	17.78	16.31	17.44	20.29	18.8	0,0,0:c1	no-mutants
D2HGDH	4.47	6.76	7.6	9.8	4.19	3.45	3.84	3.74	4.69	5.33	0,0,0:c1	no-mutants
DNAJB9	14.85	15.56	20.13	29.19	10.41	17.64	15.83	17.67	20.84	15.41	0,0,0:c1	probably-unrelated
BMPR1A	38.16	64.88	80.51	95.91	15.76	13.59	17.89	18.1	21.87	17.11	0,0,0:c1	polydactyly,absent hindlimb,abnormal digit development,abnormal tail morphology,syndactyly,short limbs,ectopic digits,abnormal radius morphology,abnormal digit morphology,abnormal ulna morphology,embryonic lethality during organogenesis, complete penetrance,embryonic lethality between implantation and somite formation, complete penetrance,abnormal hindlimb morphology
RASL12	2.68	4.56	5.23	6.85	8.39	10.83	14.17	12.57	14.75	10.61	0,0,0:c1	no-mutants
SCAMP2	9.12	20.27	27.6	34.35	0.38	1.03	0.18	0.85	0.66	0.5	0,0,0:c1	no-mutants
HNRNPUL2	34.33	45.04	68.72	79.22	282.95	125.01	161.27	232.76	228.52	305.68	0,0,0:c1	no-mutants
HMG20A	13.99	26.92	33.06	38.08	9.69	10.27	10.48	10.42	10.68	13.31	0,0,0:c1	no-mutants
ACBD3	10.81	15.39	20.3	25.9	6.41	3.94	7.06	3.17	8.19	5.36	0,0,0:c1	probably-unrelated
TMEM9B	9.33	12.82	14.01	22.63	3.16	6.88	4.29	4.52	6.22	4.7	0,0,0:c1	no-mutants
MID1IP1	3.99	9.66	16.09	13.86	37.4	65.53	57.05	63.73	69.31	65.97	0,0,0:c1	probably-unrelated
FITM2	4.01	6.67	7.91	10.28	5.89	7.83	7.81	7.37	9.58	7.56	0,0,0:c1	probably-unrelated
ARHGAP35	11.29	23.63	40.93	47.14	12.39	14.11	16.28	12.2	17.59	15.69	0,0,0:c1	probably-unrelated
DNAJB14	3.4	3.55	5.23	7.44	2.44	3.76	3.29	3.11	4.13	3.87	0,0,0:c1	no-mutants
ACOT9	14.26	15.21	18.72	30.01	11.09	10.33	10.76	11.58	12.85	14.26	0,0,0:c1	no-mutants
CCDC136	2.87	5.64	10.01	10.61	0.74	0.94	1.23	0.89	0.91	1.2	0,0,0:c1	probably-unrelated
TPCN1	6.14	10.05	14.28	17.44	8.64	8.53	9.88	9.75	12.01	11.16	0,0,0:c1	probably-unrelated
FAM160B2	4.21	6.62	8.5	10.96	7.09	7.44	8.68	8.92	8.19	10.17	0,0,0:c1	no-mutants
ADD1	39.84	81.8	110.72	134.65	57.35	59.83	68.91	72.8	74.45	80.43	0,0,0:c1	probably-unrelated
SPICE1	3.09	3.52	4.48	6.47	5.29	5.06	5.94	6.27	6.59	7.19	0,0,0:c1	probably-unrelated
SRC	10.93	22.97	37.47	41.89	4.67	5.82	5.86	5.92	6.88	6.06	0,0,0:c1	abnormal long bone morphology,abnormal femur morphology,abnormal limb morphology
MAN1A2	7.83	13.98	19.85	23.97	9.68	7.6	11.07	8.24	9.29	12.26	0,0,0:c1	probably-unrelated
FBXO7	6.85	10.42	13.28	17.93	4.14	4.57	5.41	5.95	5.5	5.82	0,0,0:c1	probably-unrelated
CERK	3.53	8.37	13.11	14.86	10.19	12.12	14.11	11.69	15.69	13.25	0,0,0:c1	probably-unrelated
DAP	32.1	38.71	69.64	76.74	113.32	158.04	198.68	204.11	180.15	207.56	0,0,0:c1	probably-unrelated
SRD5A1	4.46	9.36	12.68	14.85	9.3	10.06	10.31	10.53	13.24	13.03	0,0,0:c1	probably-unrelated
CDC42BPG	0.83	0.87	1.69	2.44	2.99	2.94	4.9	3.4	1.95	2.6	0,0,0:c1	no-mutants
MTMR10	2.69	4.99	6.67	8.64	6.34	5.72	6.03	6.14	7.66	8.03	0,0,0:c1	no-mutants
PLOD3	12.56	20.85	24.63	33.12	16.85	8.12	19.69	13.53	18.4	21.36	0,0,0:c1	embryonic lethality during organogenesis, complete penetrance,embryonic lethality during organogenesis, incomplete penetrance
MMP15	5.74	12.16	16.91	19.54	27.32	22.67	32.7	32.09	27.33	37.99	0,0,0:c1	probably-unrelated
APPL1	7.21	11.73	14.38	19.97	4.89	5.26	5.89	5.84	7.56	6.53	0,0,0:c1	probably-unrelated
SH3GL3	3.8	10.63	13.86	15.35	3.49	3.11	3.59	5.02	2.17	3	0,0,0:c1	probably-unrelated
HPS6	2.08	3.09	4.28	5.16	3.61	2.59	3.53	3.68	3.37	4.62	0,0,0:c1	probably-unrelated
MALT1	1.69	1.5	3.21	3.32	1.68	1.55	2.18	2	2.01	2.39	0,0,0:c1	probably-unrelated
AI464131	0.85	2.83	2.69	3.74	2.69	2.75	3.02	2.82	3.09	3.8	0,0,0:c1	probably-unrelated
FAM45A	9.87	8.94	10.78	17.58	4.54	4.4	5.68	5.05	5.76	6.31	0,0,0:c1	no-mutants
STX7	14.24	15.02	24.82	30.79	9.13	13.99	12.55	11.93	15.53	13.96	0,0,0:c1	no-mutants
LONP2	18.63	22.1	31.53	38.96	6.52	6.48	7.73	7.65	8.11	8.84	0,0,0:c1	no-mutants
PNRC1	20.03	32.59	44.98	51.96	20.88	19.93	25.85	25.43	26.41	28.12	0,0,0:c1	no-mutants
ATP2B1	10.82	15.8	16.7	24.11	19.71	16.79	18.58	19.01	23.14	24.94	0,0,0:c1	probably-unrelated
PTEN	8.02	10.48	13.84	18.21	19.9	18.73	22.37	22.47	28.5	23.1	0,0,0:c1	hindlimb paralysis,abnormal long bone morphology,embryonic lethality between implantation and somite formation, complete penetrance,embryonic lethality, complete penetrance,embryonic lethality during organogenesis, complete penetrance,embryonic lethality,embryonic lethality during organogenesis, incomplete penetrance
RYK	36.02	73.92	87.88	103.49	6.19	5.19	8.43	4.82	6.08	8.28	0,0,0:c1	short limbs,abnormal hindlimb morphology
RFNG	7.92	10.5	14.47	18.08	8.81	7.27	9.91	9.76	12.13	11.62	0,0,0:c1	oligodactyly,syndactyly
LIPA	15.38	22.41	24.99	38.3	24.85	32.7	33.11	29.66	40.09	30.39	0,0,0:c1	probably-unrelated
TMEM231	4.39	13.38	15.62	19.52	6.78	6.83	7.07	7.18	9.14	7.9	0,0,0:c1	polydactyly
LTA4H	58.38	100.64	121.19	154.45	29.07	27.58	33.95	33.87	39.79	39.79	0,0,0:c1	probably-unrelated
HECW2	0.92	1.15	1.34	1.99	6.22	6.57	6.91	6.42	8.79	7.98	0,0,0:c1	probably-unrelated
SKIL	5.84	10.18	15.56	16.11	1.98	2.25	2.77	2.32	3.1	2.75	0,0,0:c1	embryonic lethality before implantation, complete penetrance
PORCN	1.72	3.52	5.61	5.17	43.17	27.45	44.78	49.91	39.12	57.44	0,0,0:c1	abnormal tail morphology,syndactyly,short limbs,oligodactyly,embryonic lethality, incomplete penetrance,embryonic lethality, complete penetrance,brachydactyly,embryonic lethality between implantation and somite formation, complete penetrance,abnormal digit morphology,embryonic lethality during organogenesis, complete penetrance,abnormal autopod morphology,embryonic lethality during organogenesis,…
RCAN2	0.46	1.66	1.78	2.77	10.6	24.17	28.7	16.31	13.69	10.9	0,0,0:c1	probably-unrelated
TLCD2	3.99	4.65	5.33	9.01	1.39	2.91	1.97	2.51	3.3	2.24	0,0,0:c1	no-mutants
FAM83H	1.77	1.66	2.76	4.09	0.72	0.4	1.12	0.46	0.98	0.36	0,0,0:c1	probably-unrelated
INAFM2	4.29	5.72	10.07	10.76	16.94	16.32	18.91	19.62	20.43	24.87	0,0,0:c1	no-mutants
EXT2	20.38	40.62	52.75	62.48	15.68	15.34	16.97	15.15	22.48	20.68	0,0,0:c1	embryonic lethality between implantation and somite formation, complete penetrance
CHIC1	0.74	1.08	1.35	1.76	4.17	3.51	5.76	4.67	5.57	6.48	0,0,0:c1	probably-unrelated
ANXA9	0.69	0.67	1.24	1.4	105.04	154.9	185.33	193.2	211.4	204.34	0,0,0:c1	probably-unrelated
TRIM8	8.67	9.96	16.98	19.54	10.76	10.71	12.07	12.94	15.04	16.38	0,0,0:c1	no-mutants
AQP8	0.84	0.44	1.84	0.3	12.24	9.96	13.5	13.93	23.1	12.7	0,0,0:c1	probably-unrelated
SLC27A4	6.7	13.93	19.44	22.42	2.36	2.36	2.75	2.08	2.98	3.56	0,0,0:c1	embryonic lethality, complete penetrance
COPG1	38.58	63.78	84.88	93.21	72.76	66.3	86.42	85.25	83	105.48	0,0,0:c1	probably-unrelated
GNA12	15.49	33.23	48.87	51.46	4.02	4.34	4.79	4.52	4.45	6.09	0,0,0:c1	embryonic lethality, complete penetrance,embryonic lethality during organogenesis, complete penetrance
RMND5B	9.27	13.84	22.25	24.78	2.54	4.52	3.14	2.64	5.41	2.07	0,0,0:c1	no-mutants
FBXO42	5.76	11.15	16.05	18.35	3.19	2.92	4.17	3.53	2.31	4.84	0,0,0:c1	no-mutants
WDR13	1.85	3.75	6.61	8.15	0.9	0.77	1.36	0.91	0.15	0.59	0,0,0:c1	probably-unrelated
CEP126	0.9	0.7	1.18	1.62	1.64	2.95	3.42	1.59	3.98	1.51	0,0,0:c1	no-mutants
DAG1	24.92	49.56	55.15	70.92	67.59	56.97	82	75.52	70.56	97.07	0,0,0:c1	embryonic lethality during organogenesis, incomplete penetrance
STX4A	14.45	25.52	32.83	40.25	29.31	25.39	31.52	31.97	31.5	40.17	0,0,0:c1	embryonic lethality between implantation and somite formation, complete penetrance
ACSS1	1.91	2.85	4.12	4.84	7.08	5.42	7.97	6.41	8	9.5	0,0,0:c1	probably-unrelated
GLI1	1.18	4.86	9.63	9.34	0.97	2.61	2.99	3.06	1.2	0.98	0,0,0:c1	polydactyly,embryonic lethality during organogenesis, complete penetrance,abnormal digit morphology
SFXN5	1.15	1.14	1.97	2.69	1.9	2.35	2.78	3.78	3.07	2.6	0,0,0:c1	no-mutants
FUCA1	9.53	15.23	21.73	25.13	8.34	8.73	10.43	10.8	10.88	13.22	0,0,0:c1	probably-unrelated
STON2	3.02	2.06	3.67	5.37	4.23	5.92	7.09	7.82	8.69	7.79	0,0,0:c1	probably-unrelated
TMPPE	1.3	2.65	4.75	4.33	8.75	9.11	11.29	10.89	9.95	13.32	0,0,0:c1	no-mutants
AMBRA1	7.78	10.87	18.65	20.61	9.89	6.31	9.87	11.69	11.13	13.69	0,0,0:c1	embryonic lethality during organogenesis, incomplete penetrance
EZR	13.41	16.97	26.11	34.82	22.79	36.05	33.04	35.2	47.07	38.2	0,0,0:c1	probably-unrelated
SP1	13.09	23.53	29.07	37.6	49.54	31.51	41.8	56.31	41.57	61.32	0,0,0:c1	embryonic lethality during organogenesis, complete penetrance,abnormal phalanx morphology
ST5	7.66	13.89	21.47	24.15	17.39	14.81	22.69	24.81	19.8	24.93	0,0,0:c1	no-mutants
RAPGEF1	13.67	20.1	35.88	38.54	8.18	8.26	9.14	9.33	9.14	11.43	0,0,0:c1	embryonic lethality during organogenesis, complete penetrance,embryonic lethality between implantation and somite formation, complete penetrance
SELENON	18.65	44.39	59.99	72.63	30.1	28.3	40.38	38.43	45.46	46.84	0,0,0:c1	probably-unrelated
TSC22D2	2.84	3.74	5.64	6.76	15.54	12.68	15.19	16.27	16.54	21.42	0,0,0:c1	no-mutants
CTDSP1	36.47	66.6	91.67	109.25	18.71	25.04	32.25	32.47	26.81	34.92	0,0,0:c1	probably-unrelated
CALU	125.26	173.74	223.33	298.7	102	88.23	110.26	112.38	128.41	147.35	0,0,0:c1	no-mutants
B4GALT4	7.86	11.92	15.29	20.28	8.42	13.15	18.53	16.29	18.24	16.64	0,0,0:c1	no-mutants
LRMP	0.44	0.67	1.33	1.4	4.17	4.08	5.14	3.5	6.08	5.77	0,0,0:c1	no-mutants
PDP1	3.26	4.74	6.67	9.08	5.83	5.19	5.1	4.06	8.71	4.86	0,0,0:c1	no-mutants
SGCB	6.88	8.07	12.01	15.54	11.68	10.7	11.61	11.63	14.81	16.58	0,0,0:c1	probably-unrelated
KLF11	3.3	5.12	6.29	9.16	6.35	8.71	10.47	9.3	12.25	10.15	0,0,0:c1	probably-unrelated
MRC2	12.72	21.17	27.41	36.45	49.76	32.14	53.02	60.12	57.42	67.08	0,0,0:c1	probably-unrelated
KDM1B	3.08	5.5	7.72	10.21	9.55	10.62	10.02	9.19	10.24	8.86	0,0,0:c1	probably-unrelated
CLGN	0.31	0.8	1.62	1.36	8.29	5.7	6.29	7.07	7.76	8.16	0,0,0:c1	probably-unrelated
TDRD3	11.47	13.6	20.64	27.32	23.91	18.83	20.42	20.87	22.17	22.18	0,0,0:c1	probably-unrelated
POFUT2	22.02	35.11	50.43	68.58	16.34	16.3	18.33	15.53	15.92	15.7	0,0,0:c1	embryonic lethality, complete penetrance,embryonic lethality during organogenesis, complete penetrance,embryonic lethality,embryonic lethality between implantation and somite formation, complete penetrance
AIFM2	1.41	4.43	4.95	7.2	22.27	21.94	18.2	20.44	20.28	20.27	0,0,0:c1	probably-unrelated
PLS1	0.47	1.42	1.94	2.46	4.58	5.9	5.78	4.91	4.68	4.18	0,0,0:c1	probably-unrelated
SH3RF1	4.51	4.3	7.05	9.49	10.52	7.8	8.53	8.53	10.09	11.09	0,0,0:c1	no-mutants
CIR1	11.98	11.86	21.94	28.26	17.24	18.44	16.8	15.88	15.42	16.99	0,0,0:c1	probably-unrelated
PRKX	2.44	4.65	7.79	9.07	40.85	39.21	39.03	38.33	41.18	37.08	0,0,0:c1	no-mutants
LRCH3	3.82	5.16	9.56	12.61	5.39	6.82	4.73	5.33	5.79	5.45	0,0,0:c1	no-mutants
VMAC	3.79	10.44	17.61	19.53	14.3	12.51	13.74	11.54	13.8	12.87	0,0,0:c1	no-mutants
WAC	15.65	18.47	30.48	39.94	17.69	16.05	17.01	16.18	16.75	16.01	0,0,0:c1	no-mutants
AMER1	4.92	5.58	8.71	11.66	5.7	5.43	4.91	4.87	5.36	5.34	0,0,0:c1	abnormal appendicular skeleton morphology,abnormal long bone morphology,abnormal ulna morphology,abnormal radius morphology
RDH10	22.72	14.98	14.83	40.84	16.88	16.88	15.96	14.79	14.24	13.17	0,0,0:c1	abnormal digit development,syndactyly,brachydactyly,small forelimb buds,abnormal limb morphology,abnormal forelimb morphology,embryonic lethality during organogenesis, complete penetrance,abnormal autopod morphology,abnormal forelimb bud morphology
ANKFY1	7.59	15.15	23.55	27.99	11.93	10.67	10.75	11.22	11.22	10.47	0,0,0:c1	embryonic lethality, complete penetrance,embryonic lethality, incomplete penetrance
CARMIL1	3.9	2.06	4.16	6.48	21.71	18.74	19.23	16.28	17.93	18.66	0,0,0:c1	probably-unrelated
STOML1	2.88	4.8	7.46	10.81	9.26	10.29	7.91	7.85	8.89	7.94	0,0,0:c1	probably-unrelated
PHF3	8.35	5.43	11.39	16.59	25.08	20.9	20.36	20.35	23.65	20.24	0,0,0:c1	no-mutants
ZFP27	3.94	4.04	6.94	9.36	31.19	26.35	30.98	27.7	24.99	28.84	0,0,0:c1	no-mutants
CGNL1	5.01	3.39	7.16	11.01	5.56	7.04	6.07	4.7	5.55	5.21	0,0,0:c1	no-mutants
CTNND1	27.87	54.57	74.21	94.37	18.36	11.36	14.13	17.07	16.05	16.03	0,0,0:c1	probably-unrelated
TRIOBP	12.34	14.59	26.27	31.76	35.4	26.95	30.27	30.7	30.75	32.86	0,0,0:c1	embryonic lethality
TMCO3	2.68	5.81	7.83	10.86	18.52	21.89	18.02	17.48	20.27	16.43	0,0,0:c1	no-mutants
SLX4IP	3.91	6.2	8.61	12.58	8.58	8.84	7.25	7.61	8.98	6.75	0,0,0:c1	probably-unrelated
PLPPR2	1.4	5.88	8.09	10.46	7.17	5.15	7.76	5.77	6.27	5.97	0,0,0:c1	no-mutants
CDK20	2.44	3.73	6.19	7.83	42.12	38.51	38.4	39.74	32.55	39.03	0,0,0:c1	abnormal ulna morphology,abnormal radius morphology,preaxial polydactyly
CDK13	6.14	7.62	13.35	16.47	15.19	11.44	13.87	11.06	13.43	14.53	0,0,0:c1	no-mutants
RASAL2	1.28	1.55	2.94	3.68	15.45	14.61	14.89	14.07	13.87	13.81	0,0,0:c1	probably-unrelated
APP	51.5	75.91	94.68	141.35	418.22	354.11	322.16	344.49	336.26	411.39	0,0,0:c1	probably-unrelated
RB1CC1	4.17	3.4	7.19	9.84	5.14	5	4.38	4.84	5.01	3.98	0,0,0:c1	probably-unrelated
ZC3H12C	1.41	1.6	2.65	3.47	3.82	3.24	3.4	3.26	3.79	3.01	0,0,0:c1	no-mutants
SOS2	4.12	4.36	6.59	9.04	25.9	21.15	21.54	20.57	23.64	22.44	0,0,0:c1	probably-unrelated
AP3D1	12.35	18.56	29.05	36.31	27.51	23.19	23.73	23.18	28.15	23.16	0,0,0:c1	probably-unrelated
FBXO41	0.05	0.43	1.54	0.85	3.93	4.47	2.66	3.07	3.13	2.58	0,0,0:c1	probably-unrelated
MEX3B	15.08	41.78	57.31	67.25	67.23	45.51	51.73	58.28	54.67	63.61	0,0,0:c1	probably-unrelated
VPS13A	1.12	1.99	2.5	3.35	5.26	4.29	5.59	5.01	5.36	4.36	0,0,0:c1	probably-unrelated
ZFP609	5.65	7.42	14.2	16.14	22.59	20.74	22.73	21.46	19.48	20.07	0,0,0:c1	probably-unrelated
HAS2	9.14	9	19.77	23.54	9.6	9.55	9.66	7.34	8.73	7.86	0,0,0:c1	abnormal limb development,abnormal phalanx morphology,short limbs,abnormal digit morphology,embryonic lethality during organogenesis, complete penetrance,abnormal digit development
FSTL3	0.38	0.6	1.2	1.49	5.07	5.41	5.97	4.13	3.24	3.54	0,0,0:c1	probably-unrelated
ZFP729A	2.24	2.61	3.98	5.36	29.31	27.12	27.33	26.87	23.83	24.73	0,0,0:c1	no-mutants
TRPC1	0.34	0.33	1.02	1.16	2.59	3.19	3.19	2.48	3.02	1.72	0,0,0:c1	probably-unrelated
TNFAIP2	2	3.8	5.33	7.39	54.97	58.38	51.14	52.83	56.02	44.31	0,0,0:c1	no-mutants
ADCK2	3.64	6.36	7.56	12.78	6.75	8.31	6.64	6.47	6.81	4.54	0,0,0:c1	probably-unrelated
SOWAHC	4.92	5.02	7.52	11.39	4.94	5.05	5.06	4.8	5.03	3.53	0,0,0:c1	no-mutants
NID1	13.59	33.51	39.84	54.84	337.9	206.31	292.56	273.81	296.88	282.65	0,0,0:c1	probably-unrelated
CMPK2	1.47	2.17	5.42	6.41	3.35	2.78	3.47	3.15	3.11	2.35	0,0,0:c1	probably-unrelated
FBXL8	0.32	0.43	0.77	1.07	2.62	3.06	2.23	2.32	2.38	2.47	0,0,0:c1	no-mutants
FAM126A	6.83	8.15	14.95	20.79	13.24	15.8	14.38	11.83	12.9	10.67	0,0,0:c1	probably-unrelated
JAG1	1.61	2.59	13.25	8.98	31.7	30.52	27.01	26.38	28.14	28.18	0,0,0:c1	embryonic lethality during organogenesis, complete penetrance,embryonic lethality during organogenesis
CNNM2	1.14	2.35	3.39	4.48	8.67	6.36	7.75	7.74	8.16	6	0,0,0:c1	embryonic lethality prior to tooth bud stage
KLHL42	1.82	3.87	7.15	9	3.79	4.01	4.09	3.56	3.03	2.64	0,0,0:c1	no-mutants
ROCK2	4.24	2.96	5.56	8.3	12.28	9.75	9.83	9.96	10.46	10.23	0,0,0:c1	embryonic lethality, complete penetrance
PRKD2	4.2	9.26	12.23	16.72	2.07	1.88	1.01	1.47	1.91	1.91	0,0,0:c1	probably-unrelated
TNFSF12	1.97	2.6	3.62	5.31	2.85	2.2	2.83	2.76	1.55	2.47	0,0,0:c1	probably-unrelated
DOCK5	0.75	0.97	1.94	2.3	2.37	2.03	1.52	1.97	1.81	2.39	0,0,0:c1	probably-unrelated
TBC1D16	6.52	12.8	25.27	29.97	7.03	7.49	7.03	5.43	7.02	5.71	0,0,0:c1	no-mutants
BCL9	11.29	19.92	36.52	40.97	9.33	5.92	7.61	7.66	7.87	8.29	0,0,0:c1	probably-unrelated
CHD8	8.94	10.38	18.93	23.32	13.03	12.15	10.77	10.75	11.25	11.02	0,0,0:c1	embryonic lethality, complete penetrance,embryonic lethality during organogenesis, complete penetrance
ZFP292	4.24	4.86	9.66	12.69	5.13	5.44	4.74	4.65	4.72	4.1	0,0,0:c1	no-mutants
SDCCAG8	1.97	2.25	3.55	5.33	2.76	2.33	2.81	2.4	2.49	2.38	0,0,0:c1	polydactyly
ZFP939	1.03	0.94	1.53	2.56	6.06	6.27	6.12	5.6	5.19	4.97	0,0,0:c1	no-mutants
PRKCE	2.01	3.21	5.07	6.88	6.8	5.41	5.77	6.21	6.29	5.29	0,0,0:c1	probably-unrelated
PGAP1	0.82	2.3	3.59	5.06	2.88	3.44	3.13	2.84	2.76	2.36	0,0,0:c1	probably-unrelated
TBC1D2	0.63	0.6	1.2	1.64	2.81	2.44	1.45	2.49	2.4	2.68	0,0,0:c1	probably-unrelated
BCHE	1.65	1.13	2.12	3.4	9.76	8.82	9.91	8.86	8.85	7.6	0,0,0:c1	probably-unrelated
UPF2	5.21	4.88	11.16	14.23	17.33	14.56	14.65	14.6	15.74	14.14	0,0,0:c1	embryonic lethality, complete penetrance
PJA2	15.44	27.99	43.4	59.61	8.19	8.19	7.72	6.55	6.81	7.72	0,0,0:c1	probably-unrelated
NET1	32.86	57.4	87.98	120.75	82.38	92.58	78.03	75.39	68.54	81.84	0,0,0:c1	probably-unrelated
PRKAB2	1.83	1.92	3.15	4.73	5.17	5.99	5.4	4.66	4.11	4.65	0,0,0:c1	probably-unrelated
D5ERTD579E	3.39	4.03	7.54	10.01	12.65	9.59	10.03	9.55	10.71	11.46	0,0,0:c1	no-mutants
TRAPPC9	5.26	10.73	19.42	23.57	6.71	6.15	5.15	5.85	6.29	5.67	0,0,0:c1	probably-unrelated
TCTA	3.08	3.7	6.34	9.85	3.59	3.62	3.22	2.7	3.82	2.66	0,0,0:c1	no-mutants
TLE3	18.89	26.52	47.11	61.58	13.8	12.5	11.82	10.66	11.33	12.64	0,0,0:c1	embryonic lethality, complete penetrance
PTPRG	6.12	11.48	18.2	23.26	12.28	8.47	9.57	9.71	10.48	10.73	0,0,0:c1	probably-unrelated
ADD3	13.17	21.33	36.63	50.19	31.67	31.34	27.74	26.26	27.33	24.82	0,0,0:c1	probably-unrelated
RBM41	1.92	1.79	3.28	5.07	63.08	54.28	57.85	50.88	49.96	43.03	0,0,0:c1	probably-unrelated
DNAJC1	2.5	2.4	4.19	6.16	17.29	13.59	16.03	14.37	16.67	15.66	0,0,0:c1	no-mutants
PHF21A	3.78	5.35	10.97	14.24	7.34	7.49	6.97	6.93	7.67	6.68	0,0,0:c1	probably-unrelated
RNFT2	0.54	1.13	3.2	3.68	3.54	3.79	3.48	4.14	3.28	2.88	0,0,0:c1	no-mutants
PHF20L1	2.46	2.3	3.76	5.96	32.19	27.16	29.37	25.72	28.99	28.26	0,0,0:c1	no-mutants
ATXN7	1.18	1.45	2.29	3.37	3.43	3.18	3.09	2.74	3.23	2.99	0,0,0:c1	probably-unrelated
TMEM169	0.22	1.66	3.11	3.63	3.57	3.27	3.2	2.88	3.19	3.3	0,0,0:c1	no-mutants
DSEL	2.88	5.12	7.93	11.53	3.56	3.79	3.91	3	2.82	3.29	0,0,0:c1	probably-unrelated
SSH2	1.38	3.24	6.25	7.54	4.57	3.67	3.73	3.91	4.39	3.86	0,0,0:c1	no-mutants
MAP3K2	1.08	1.78	2.87	4.04	3.28	3.49	2.82	2.44	2.97	2.95	0,0,0:c1	probably-unrelated
RCOR1	5.95	9.94	19.05	24.01	26.66	24.86	23.62	21.85	26.3	23.49	0,0,0:c1	embryonic lethality, incomplete penetrance
CPD	5.97	11.5	18.59	23.98	52.08	38.23	44.03	51.62	42.66	44.62	0,0,0:c1	no-mutants
TRIM56	0.62	0.85	1.9	2.29	6.39	5.27	6.42	5.91	6.22	4.99	0,0,0:c1	probably-unrelated
LPIN1	0.84	1.15	2.41	2.95	4.08	3.41	3.82	4.04	4.21	3.48	0,0,0:c1	embryonic lethality during organogenesis, complete penetrance,hindlimb paralysis
PLXNB2	25.79	41.8	75.19	98.83	24.23	19.53	22.01	20.49	24.84	19.4	0,0,0:c1	probably-unrelated
AEBP2	6.97	10.21	14.75	19.93	10.16	8.44	9.05	8.86	8.15	9.7	0,0,0:c1	embryonic lethality, complete penetrance
OSBPL8	3.33	3.95	7.38	9.76	4.59	4.41	3.91	4.05	5.54	3.5	0,0,0:c1	probably-unrelated
ACBD5	5.18	7.04	11.17	15.03	8.15	8.55	6.35	7.56	7.21	8.47	0,0,0:c1	probably-unrelated
MMRN2	1.97	3.98	5.26	7.46	2.29	2.04	2.65	2.57	2.28	1.9	0,0,0:c1	no-mutants
DSTYK	2.64	6.07	9.92	11.86	35.79	28.21	28.51	31.97	30.34	36.45	0,0,0:c1	probably-unrelated
KANSL3	6.75	9.24	14.08	18.58	40.06	29.78	34.2	34.71	35.51	40.14	0,0,0:c1	no-mutants
EXT1	14.04	27.82	40.58	52.25	13.8	11.98	14.8	13.14	14.27	12.98	0,0,0:c1	abnormal radius morphology,abnormal limb morphology,abnormal forelimb morphology,embryonic lethality during organogenesis, complete penetrance,embryonic lethality,embryonic lethality between implantation and somite formation, complete penetrance
MYZAP	1.87	2.88	4.44	6.74	10.45	11.81	8.86	8.84	10.9	10.04	0,0,0:c1	probably-unrelated
MARK1	3.42	3.76	6.72	8.93	38.78	36.46	37.82	31.86	33.27	36.57	0,0,0:c1	no-mutants
SETD1B	4.11	7.07	13.8	15.56	15.39	12.24	14.02	13.21	12.74	14.59	0,0,0:c1	embryonic lethality during organogenesis, complete penetrance
RABGAP1	10.17	14.03	24.98	33.12	15.84	16.89	14.71	15.37	17.11	14.1	0,0,0:c1	no-mutants
TECPR2	1.13	1.2	2.11	3.03	4.29	4.34	3.63	3.52	4.38	3.66	0,0,0:c1	no-mutants
CEP128	1.81	2.1	4.3	5.5	4.62	4.6	4.69	4.02	4.5	4.18	0,0,0:c1	no-mutants
TAB2	23.44	34.5	55.63	71.35	19.69	14.36	17.68	16.88	17.19	18.46	0,0,0:c1	embryonic lethality, complete penetrance,embryonic lethality during organogenesis, complete penetrance
ZCCHC14	6.56	11.47	22.12	26.2	3.2	2.82	3.06	3	3.08	2.74	0,0,0:c1	probably-unrelated
MYH9	15.06	17.17	37.45	44.44	93.48	72.1	79.54	88.73	99.47	79.72	0,0,0:c1	embryonic lethality during organogenesis, complete penetrance,embryonic lethality between implantation and somite formation, complete penetrance
CAMKK2	2.79	5.57	9.21	10.41	8.87	9.18	8.81	8.55	9.76	9.99	0,0,0:c1	probably-unrelated
TEX2	1.97	1.88	3.42	4.88	3.21	4.18	3.57	3.73	4.42	3.51	0,0,0:c1	no-mutants
ESRP2	1.49	3.35	4.15	5.76	22.64	22.62	22.17	18.9	24.26	23.67	0,0,0:c1	probably-unrelated
EFR3A	6.8	8.81	13.02	17.56	5.32	5.74	5.96	5.55	6.34	5.78	0,0,0:c1	no-mutants
EPHB2	4.11	7.7	15.19	17.66	10.92	8.28	13.67	10.6	10.28	9.71	0,0,0:c1	probably-unrelated
KLHL20	4.4	7.02	10.07	12.85	8.98	8.22	10.36	9.04	9.61	10.14	0,0,0:c1	probably-unrelated
EPB41L4B	1.69	2.85	6.6	7.11	1.9	2.34	2.04	1.91	2.08	2.19	0,0,0:c1	probably-unrelated
RUNDC1	3.61	6.48	8.68	11.61	4.26	4.5	4.65	4.17	4.63	4.97	0,0,0:c1	probably-unrelated
CASP7	6.53	12.7	15.68	22.72	12.75	17	17	16.59	16.54	12.96	0,0,0:c1	probably-unrelated
IL17RC	0.38	0.91	1.4	1.8	3.43	4.13	4.28	3.76	4.14	3.73	0,0,0:c1	probably-unrelated
PCMTD1	2.5	4.57	6.75	9.02	6.08	7.72	7.08	7.23	7.06	6.84	0,0,0:c1	no-mutants
MANBA	0.85	1.49	2.57	3.23	1.78	2.64	2.29	2.45	2.61	1.96	0,0,0:c1	probably-unrelated
ZFP46	4.17	10.31	17.11	20.67	65.19	76.21	81.87	70.11	65.01	75.91	0,0,0:c1	no-mutants
B4GALT6	5.7	8.48	12.38	16.98	14.96	14.85	17.98	15.49	16.6	16.87	0,0,0:c1	probably-unrelated
NRP2	9.12	28.83	81.68	61.27	22.08	24.9	23.55	20.77	20.64	28.65	0,0,0:c1	probably-unrelated
ITPRIPL1	3.81	7.05	9.76	12.58	2.83	2.29	2.99	2.6	3.04	2.96	0,0,0:c1	no-mutants
RSU1	19.72	42	59.8	76.27	65.3	78.11	78.11	77.44	71.66	70.86	0,0,0:c1	no-mutants
CBS	1.32	1.5	1.61	2.96	50.09	51.61	63.74	57.01	55.79	57.63	0,0,0:c1	abnormal tail morphology,abnormal limb morphology
RAB15	6.77	9.46	12.92	19.67	5.86	8.7	7.85	9.79	8.03	5.39	0,0,0:c1	probably-unrelated
SRP54B	27.16	40.83	47.02	76.91	40.14	40.18	41.54	40.5	47.15	43.23	0,0,0:c1	no-mutants
RNF19A	7.98	11.1	16.66	23.1	10.98	10.99	11.12	12.43	13.03	12.28	0,0,0:c1	probably-unrelated
PHLPP1	1.92	3.2	5.12	7.3	8.95	10.95	14.08	8.04	9.01	11.06	0,0,0:c1	probably-unrelated
STMN2	1.03	2.75	9.68	7.36	34.88	36.8	32.22	45.66	43.31	29.75	0,0,0:c1	no-mutants
SCARF2	7.99	25.56	35.46	44.83	13.92	6.51	12.3	14.18	10.72	14.61	0,0,0:c1	probably-unrelated
WWOX	1.92	3.13	4.66	6.01	36.1	41.57	42.25	45.07	43	40.95	0,0,0:c1	probably-unrelated
RAB29	3.33	4.68	7.13	10.84	3.38	4.63	4.82	4.09	4.74	3.93	0,0,0:c1	no-mutants
SP4	2.47	3.69	6.38	7.62	64.25	57.46	75.12	66.31	69.16	75.45	0,0,0:c1	probably-unrelated
LPCAT2	0.28	1.05	1.71	2.09	9.87	13.22	11.96	11.86	12.98	10.73	0,0,0:c1	no-mutants
SLC35E3	6.88	13.88	24.93	30.64	9.51	10.58	11.23	10.56	11.83	10.15	0,0,0:c1	no-mutants
PDZD8	7.96	11.54	18.28	23.52	17.38	11.98	13.61	16.25	19.27	17.74	0,0,0:c1	no-mutants
GNAS	546.02	888.65	1446.59	1730.32	20.76	20.15	23.48	22.83	23.36	23.75	0,0,0:c1	short limbs,abnormal tibia morphology
LRRC1	6.13	6.33	8.6	14.62	7.19	6.3	6.69	6.2	7.97	6.69	0,0,0:c1	no-mutants
PARD3	11.25	18.04	30.82	38.38	11.03	9.72	9.4	10.57	11.33	11.87	0,0,0:c1	embryonic lethality during organogenesis, complete penetrance,embryonic lethality prior to tooth bud stage,embryonic lethality prior to organogenesis
TAOK1	3.04	2.88	5.3	6.9	19.5	21.23	21.71	21.73	22.71	22.43	0,0,0:c1	no-mutants
MINK1	4.06	3.9	7.43	9.69	9.55	9.46	10.38	9.13	9.87	10.41	0,0,0:c1	no-mutants
SHISA5	10.21	22.05	31.16	41.58	32.64	27.32	33.28	28.65	32.46	32.38	0,0,0:c1	probably-unrelated
TRIM44	19.4	35.79	54.48	70.41	11.45	11.42	12.73	11.64	11.71	12.48	0,0,0:c1	no-mutants
SCAI	1.63	1.9	3.72	5.05	4.78	6.02	5.96	5.29	6.18	4.28	0,0,0:c1	probably-unrelated
TRIM13	6.93	9.89	14.11	20.65	5.31	5.38	4.82	5.15	5.78	4.99	0,0,0:c1	no-mutants
WFS1	1.87	4	5.54	8.26	5.67	5.24	5.3	4.29	6.61	3.41	0,0,0:c1	probably-unrelated
FCHO2	4.43	4.7	7.16	11.73	7.8	7.76	8.85	7.89	7.57	8.15	0,0,0:c1	no-mutants
SLC25A24	10.86	26.35	41.04	49.8	35.02	34.76	37.97	33.49	35.26	40.59	0,0,0:c1	no-mutants
NGLY1	4.73	8.26	13.08	18.76	15.43	16.13	16.31	16.77	16.26	16.84	0,0,0:c1	embryonic lethality
RNF208	1.1	2.04	3.28	4.46	2.62	2.05	2.67	2.39	2.45	2.76	0,0,0:c1	no-mutants
CCNG2	17.72	37.2	63.52	79.46	4.12	4.47	3.97	4.67	3.9	3.8	0,0,0:c1	no-mutants
HEATR5B	2.23	4.77	8.31	10.02	8.12	7.12	8.42	7.64	7.47	8.72	0,0,0:c1	no-mutants
WWC2	5.6	8.48	15.96	19.92	8.92	9.22	10.24	9.97	9.06	8.8	0,0,0:c1	no-mutants
CAR5B	0.25	0.42	0.95	1.14	28.81	28.83	32.01	31.13	31.75	29.08	0,0,0:c1	no-mutants
PQLC3	1.59	2.04	3.58	5.17	103.18	108.33	106.77	121.39	109.66	74.07	0,0,0:c1	no-mutants
MAGI3	2.38	1.73	3.43	5.21	28.75	23.54	27.87	26.13	25.72	29.67	0,0,0:c1	no-mutants
GABPB2	5.3	6.88	10.82	14.43	3.49	2.56	2.86	2.84	3.08	3.74	0,0,0:c1	probably-unrelated
BTBD7	6.82	12.91	22.5	27.31	22.46	19.93	23.62	20.19	23.83	19.8	0,0,0:c1	no-mutants
ABHD2	3.01	6.92	10.54	13.47	4.98	5.94	5.43	4.71	6.05	4.95	0,0,0:c1	probably-unrelated
ZFP366	0.17	0.38	0.86	1.03	1.38	1.8	1.69	1.25	1.46	1.39	0,0,0:c1	syndactyly
CLSTN1	19.03	27.05	48.18	60.93	52.81	37.96	48.88	46.41	48.56	55.78	0,0,0:c1	probably-unrelated
STAT1	1.91	3.97	5.7	8.25	20.88	20.16	20.83	17.92	20.55	19.86	0,0,0:c1	abnormal tibia morphology
DOCK1	7.41	12.97	26.9	34.42	17.96	20.42	17.4	18.59	20.23	16.61	0,0,0:c1	probably-unrelated
FHOD3	1.28	2.96	4.65	6.01	7.4	7.88	8	8.6	8.51	7.4	0,0,0:c1	embryonic lethality during organogenesis, complete penetrance
DCAF5	4.99	10.38	17.61	21.88	12.54	11.91	14.16	12.69	13.67	14.41	0,0,0:c1	no-mutants
RUSC1	3.13	7.03	10.68	13.94	57.99	56.17	65.94	62.04	60.77	69.52	0,0,0:c1	no-mutants
CASP8	6.05	9.33	11.81	17.86	6.49	6.29	5.79	6.87	6.93	7.33	0,0,0:c1	embryonic lethality, complete penetrance,embryonic lethality during organogenesis, complete penetrance,embryonic lethality during organogenesis, incomplete penetrance
IER3	1.69	2.01	3.35	4.37	13.1	10.96	13.57	14.22	13.28	14.71	0,0,0:c1	probably-unrelated
GRK3	0.47	0.51	0.96	1.29	5.19	5.16	6.46	6.01	5.49	5.47	0,0,0:c1	probably-unrelated
GRHL3	2.29	6.79	7.89	12.41	12.89	15.48	14.85	12.1	17.14	12.1	0,0,0:c1	probably-unrelated
SMAD1	8.4	10.9	18.67	25.27	52.61	54.91	58.28	54.71	61.58	51.03	0,0,0:c1	embryonic lethality during organogenesis, complete penetrance,embryonic lethality during organogenesis
PELI2	3.43	5.02	8.19	11.25	4.94	6.05	5.97	6.06	6.14	5.6	0,0,0:c1	no-mutants
IL17RA	1	1.49	2.14	3.24	12.49	13.6	14.16	14	15.72	11.77	0,0,0:c1	probably-unrelated
TMEM44	1.4	3.75	5.69	7.79	6.03	7.56	6.98	7.04	7.88	6.31	0,0,0:c1	no-mutants
ARHGEF7	11.89	30.06	44.41	53.53	10.37	9.94	11.15	11.96	11.6	10.08	0,0,0:c1	probably-unrelated
PLXNA1	9.12	13.92	21.97	29.11	32.95	24.71	32.07	31.08	31.91	32.76	0,0,0:c1	abnormal long bone morphology
TBC1D12	1.58	2.6	3.91	5.68	9.28	9.39	9.6	9.15	10.43	9.3	0,0,0:c1	no-mutants
SUN2	5.7	13.49	22.98	27.61	4.07	2.8	3.68	3.76	4.09	4	0,0,0:c1	probably-unrelated
SOGA1	4.29	7.43	15.79	18.89	6.9	7.64	6.84	7.58	5.16	7.54	0,0,0:c1	no-mutants
NCOR1	10.45	10.13	21.06	30.07	51.13	58.64	52.94	58.48	55.63	52.81	0,0,0:c1	probably-unrelated
KCTD21	1.04	2.3	3.53	5.13	23.64	24.85	24.02	21.19	27.21	21.47	0,0,0:c1	no-mutants
LRBA	1.71	4.47	14.55	13.99	13.74	12.98	13.55	16.89	15.34	11.42	0,0,0:c1	probably-unrelated
VPS8	2.63	4.4	7.04	9.08	20.13	17.94	21.23	19.86	21.59	21.61	0,0,0:c1	no-mutants
ANKS6	0.93	1.52	4.35	5.51	9.42	8.34	11.53	8.21	8.07	8.18	0,0,0:c1	probably-unrelated
NBEA	1.57	2.99	6.74	8.18	3	1.88	3.37	2.7	3.35	2.63	0,0,0:c1	probably-unrelated
TRPM4	1.28	2.36	3.41	5	5.55	3.84	3.26	4.43	5.71	5.39	0,0,0:c1	probably-unrelated
LYST	0.39	0.6	0.98	1.49	118.78	153.95	142.36	145.5	152.15	115.93	0,0,0:c1	probably-unrelated
LDB2	3.9	14.53	22.74	29.76	17.91	15.39	19.26	18.02	17.39	19.34	0,0,0:c1	probably-unrelated
AUTS2	4.77	9.14	22.21	23.86	8.28	4.48	6.53	7.56	8.13	8.62	0,0,0:c1	probably-unrelated
TRAF3	2.28	2.63	5.26	7.57	14.18	14.45	14.37	13.98	17.81	11.8	0,0,0:c1	probably-unrelated
GALNT10	5.63	13.28	20.5	28.3	3.89	4.06	3.88	4.27	3.15	4.53	0,0,0:c1	probably-unrelated
FNBP1	4.64	6.84	11.27	15.6	5.76	5.33	6.14	6.19	6.59	5.92	0,0,0:c1	no-mutants
L3HYPDH	2.72	4.44	5.26	8.84	7.96	8.1	9.5	8.84	8.63	8.99	0,0,0:c1	no-mutants
NIPAL3	0.93	1.82	3.12	3.83	10.02	7.68	8.03	8.81	9.88	10.82	0,0,0:c1	probably-unrelated
LNPK	4.75	4.68	11.31	13.86	6.58	7.65	7.88	7.51	7.64	8.16	0,0,0:c1	abnormal fibula morphology,abnormal tibia morphology,abnormal limb morphology
DUSP16	3.73	8.45	12.32	18.26	5.36	4.79	5.69	5.2	4.39	5.96	0,0,0:c1	probably-unrelated
MTSS1L	8.35	12.42	27.94	34.44	9.83	9.76	10.77	10.58	9.49	11.74	0,0,0:c1	probably-unrelated
ZFHX2	0.7	1.35	3.59	4.94	6.65	6.14	5.69	5.59	7.88	4.79	0,0,0:c1	no-mutants
KIF26B	1.97	7.68	25.96	24.02	89.11	49.71	76.59	81.21	91.34	85.73	0,0,0:c1	probably-unrelated
IRF8	0.37	0.88	1.34	1.96	40.83	46.55	51.48	51.47	45.34	47.65	0,0,0:c1	probably-unrelated
EFNA1	16.04	17.21	38.42	31.57	31.69	28.96	30.19	29.77	35.21	34.42	0,0,0:c1	probably-unrelated
SNX13	3.87	3.96	5.76	7.48	4.89	3.96	4.32	4.3	4.51	4.76	0,0,0:c1	embryonic lethality during organogenesis, complete penetrance
FAM222A	0.87	1.53	3.03	1.75	1.31	1.45	1.48	1.61	1.39	0.96	0,0,0:c1	no-mutants
SOCS7	3.57	5.38	8.57	9.83	3.83	3.34	3.48	3.52	3.74	4.2	0,0,0:c1	probably-unrelated
PLBD2	8.05	13.12	18.16	21.12	22.95	19.34	17.51	17.49	22	24.15	0,0,0:c1	no-mutants
PARG	10.27	11.52	18.17	22.96	20.72	20.03	22.51	19.65	23.87	20.48	0,0,0:c1	embryonic lethality between implantation and somite formation, complete penetrance
RARG	24.5	69.34	109.25	103.72	12.07	7.24	10.05	11.79	10.84	13.35	0,0,0:c1	probably-unrelated
LRP12	9.01	20.36	28.16	31.18	21.23	17.72	19.21	18.94	21.67	22.81	0,0,0:c1	no-mutants
PTCH2	0.47	1.77	3.39	1.42	24.49	23.95	30.2	24.86	18.52	30.16	0,0,0:c1	probably-unrelated
ZFP597	1.77	2.42	3.63	4.28	16.56	14.84	17.18	15.7	15.91	17.66	0,0,0:c1	no-mutants
TRABD2B	0.92	0.38	0.45	1.22	30.53	38.65	43.13	39.52	38.11	29.03	0,0,0:c1	no-mutants
MOV10	6.47	18.28	27.32	28.5	3.6	3.24	3.15	2.8	3.35	4.09	0,0,0:c1	embryonic lethality, complete penetrance,embryonic lethality prior to organogenesis
COX4I2	15.79	13.68	20.38	29.04	294.68	294.32	337.73	323.3	283.82	292.37	0,0,0:c1	probably-unrelated
PLEKHG2	9.21	19.79	32.38	34.71	4.93	4.02	4.47	4.87	5.11	5.35	0,0,0:c1	no-mutants
ARL15	9.64	15.86	23	27.55	11.97	12.66	13.56	12.43	14.2	12.12	0,0,0:c1	no-mutants
KLHL8	2.87	5.1	7.15	8.53	13.58	13.76	13.01	11.99	13.87	15.68	0,0,0:c1	probably-unrelated
CBLN1	0.69	7.68	18.05	8.8	6.56	5.79	7.98	7.62	8.33	3.87	0,0,0:c1	probably-unrelated
SLC38A10	15.05	20.76	30.35	37.78	9.69	7.26	8.58	9.16	10.3	9.83	0,0,0:c1	probably-unrelated
RHBDF1	4.78	5.19	7.6	10.9	18.2	23.66	22.36	21.61	21.86	21.09	0,0,0:c1	embryonic lethality during organogenesis, complete penetrance
APPL2	4.84	6.44	9.5	11.67	10.58	9.3	11.07	10.23	12.32	11.38	0,0,0:c1	probably-unrelated
PWWP2B	3.06	4.28	6.75	8.43	5.27	6.03	7.17	5.33	6.32	4.91	0,0,0:c1	no-mutants
RGP1	5.27	9.18	14.72	16.28	12.89	16.69	15.85	16.11	14.68	11.95	0,0,0:c1	embryonic lethality prior to tooth bud stage,embryonic lethality prior to organogenesis
SPSB1	2.88	6.47	6.82	10.01	16.52	16.02	23.06	17.56	18.33	17.17	0,0,0:c1	no-mutants
UGGT2	1.3	1.29	2.12	2.78	12.7	15.83	12.98	12.07	16.65	13.62	0,0,0:c1	no-mutants
STK32C	0.43	0.55	1.04	1.16	0.89	1.13	1.14	1.29	1.25	0.76	0,0,0:c1	no-mutants
INPP5B	5.53	7.68	11.21	14.05	4.66	4.77	4.54	4.12	5.32	5	0,0,0:c1	embryonic lethality during organogenesis, complete penetrance
SPPL2A	8.13	11.61	17.45	20.95	35.16	39.19	33.62	34.45	39.38	35.43	0,0,0:c1	probably-unrelated
CTNS	3.98	9.19	13.69	15.18	5.79	7.02	7.2	6.51	5.97	5	0,0,0:c1	probably-unrelated
ATXN7L2	4.63	7.87	11.85	12.59	1.44	1.49	1.37	1.09	1.25	1.71	0,0,0:c1	no-mutants
NFKBIE	1.46	1.95	3.58	4.09	9.71	6.95	8.32	9.94	7.4	10.86	0,0,0:c1	probably-unrelated
LMF2	9.8	15.3	17.93	24.48	48.07	37.19	44.96	43.92	46.49	48.33	0,0,0:c1	no-mutants
ENTPD4	5.87	8.86	12.48	17.36	12.79	10.25	12.94	11.35	12.28	14.03	0,0,0:c1	no-mutants
GCC1	2.44	4.78	8.07	9.78	6.08	5.64	5.57	6.37	6.05	6.85	0,0,0:c1	no-mutants
RALBP1	12.27	16.12	23.53	31.22	33.87	28.85	32.38	32.32	33.74	36.5	0,0,0:c1	probably-unrelated
CLIP2	6.76	14.63	25.32	28.31	33.77	33.91	36.15	31.41	36.95	34.26	0,0,0:c1	probably-unrelated
ZSWIM8	7.57	11.13	20.83	24.7	8.07	5.17	6.71	6.61	6.5	8.52	0,0,0:c1	no-mutants
RNF215	4.91	6.59	9.16	12.16	4.13	3.43	4.19	3.75	4.1	4.47	0,0,0:c1	no-mutants
PLPP6	1.16	2.98	4.79	5.4	8.56	8.34	9.59	7.1	8.04	9.07	0,0,0:c1	probably-unrelated
ADAMTS20	1.21	1.01	0.97	2.39	10.96	10.79	10.64	12.6	9.19	10.69	0,0,0:c1	interdigital webbing,abnormal interdigital cell death,syndactyly
GOLGA5	7.34	8.36	13.71	17.98	14.83	13.8	14.39	15.46	14.36	16.6	0,0,0:c1	probably-unrelated
PFN2	40.54	65.86	109.17	143.6	151.53	214.37	219.67	181.68	190.22	137.55	0,0,0:c1	probably-unrelated
PPP1R12B	0.39	0.43	0.95	1.21	1.95	2.58	2.06	2.09	2.34	1.99	0,0,0:c1	no-mutants
VPS39	5.22	9.66	14.14	17.52	4.97	4.61	4.26	4.27	4.48	5.1	0,0,0:c1	no-mutants
ANKRD42	0.82	1.61	2.17	2.86	0.92	0.55	0.77	1.08	0.84	0.68	0,0,0:c1	no-mutants
TBL2	6.26	11.41	15.79	20.23	32.31	26.89	29.51	29.16	32.27	30.36	0,0,0:c1	no-mutants
FRS2	5.51	10.07	16.05	19.26	7.81	8.42	9.14	8.02	9.11	7.74	0,0,0:c1	embryonic lethality during organogenesis, complete penetrance,embryonic lethality prior to tooth bud stage,embryonic lethality between implantation and somite formation, complete penetrance,abnormal limb morphology
BET1L	14.25	12.88	19.92	29.76	13.18	13.38	15.03	13.43	14.97	14.79	0,0,0:c1	no-mutants
PGGHG	4.5	7.76	12.04	15.07	3.88	4.3	4.46	4.47	4.04	3.52	0,0,0:c1	no-mutants
INPP5A	7.83	15.59	21.34	27.58	11.94	12.67	11.23	11.74	13.36	11.75	0,0,0:c1	probably-unrelated
NATD1	6.65	13.93	20.86	25.11	27.93	25.83	26.58	27.26	26.21	29.29	0,0,0:c1	probably-unrelated
SNX19	6.36	10.37	13.55	18.6	2.9	2.45	2.48	2	2.81	3.01	0,0,0:c1	no-mutants
DVL3	10.29	16.22	32.36	34.78	66.98	60.87	67.88	63.14	58.09	75.32	0,0,0:c1	probably-unrelated
ZKSCAN1	4.59	7.85	13.33	17.19	5.34	5.56	6.45	5.09	5.21	4.58	0,0,0:c1	no-mutants
GSK3B	9.61	14.79	25.42	29.87	30.5	31.42	33.61	30.9	32.01	29.72	0,0,0:c1	probably-unrelated
MON2	3.63	7.38	11.06	13.39	25.76	24.95	26.79	26.9	25.83	27.97	0,0,0:c1	no-mutants
PLEKHA7	1.91	1.2	2.18	3.24	7	6.95	6.29	6.24	6.12	8.01	0,0,0:c1	probably-unrelated
LPIN2	5.64	10.15	14.6	18.44	6.57	5.05	6.66	5.67	6.92	6.57	0,0,0:c1	probably-unrelated
MGRN1	11.73	31.06	44.7	51.84	33.83	32.78	35.04	35.08	37.36	34.88	0,0,0:c1	probably-unrelated
KMT5B	4.85	5.7	10.08	12.99	16.65	15.84	16.95	16.33	17.61	16.35	0,0,0:c1	probably-unrelated
FAM221A	0.97	1.6	2.54	3.24	7.38	9.02	7.48	7.79	8.97	6.88	0,0,0:c1	no-mutants
SEPT6	18.2	37.12	85.15	83.65	75.66	60.96	74.74	63.03	66.99	81.99	0,0,0:c1	probably-unrelated
HOOK3	2.82	3.23	5.71	7.14	5.88	6	5.5	5.1	5.82	5.94	0,0,0:c1	probably-unrelated
DENND1A	5.51	8.97	14.74	18.04	17.32	17.75	18.05	18.19	17.17	18.41	0,0,0:c1	no-mutants
ZBTB37	1.31	1.17	1.71	2.64	13.18	10.61	12.14	12.37	10.13	14.06	0,0,0:c1	no-mutants
TAOK2	8.43	10.51	19.98	24.45	54.42	36.92	50.64	42.77	41.55	58	0,0,0:c1	probably-unrelated
ZFP729B	2.64	2.36	3.85	5.64	230.37	164.94	206.29	197.51	159.42	236.42	0,0,0:c1	no-mutants
MARCKS	138.47	214.62	311.34	413.17	334.11	286.36	381.79	331.55	279.06	389.1	0,0,0:c1	probably-unrelated
CAMK1	20.85	31.3	44.41	59.6	5.92	7.89	8.1	6.92	7.68	6.6	0,0,0:c1	probably-unrelated
TDRP	2.42	2.16	3.43	5.23	5.26	7.56	7.2	6.44	6.26	6.2	0,0,0:c1	probably-unrelated
MAL2	1.13	0.7	1.03	1.91	7.8	14.23	11.67	11.85	11.77	10.68	0,0,0:c1	no-mutants
ST3GAL1	5.44	7.15	10.42	14.48	5.9	6.55	6.65	6.02	7.99	5.63	0,0,0:c1	probably-unrelated
SH3BP5	13.17	29.56	42.15	48.48	18.59	15.61	20.27	19.61	19.41	20.88	0,0,0:c1	probably-unrelated
POLK	1.09	1.36	2.09	2.92	1.51	1.65	1.4	1.43	1.81	1.54	0,0,0:c1	probably-unrelated
RBMS2	13.57	27.94	36.5	45.36	9.65	8.75	8.01	10.06	9.36	10.14	0,0,0:c1	no-mutants
PICALM	34.18	58.91	83.06	103.89	38.89	42.52	41.26	39.48	45.61	41.14	0,0,0:c1	probably-unrelated
MIER3	4.55	6.49	10.36	12.62	5.93	6.36	6.91	6.03	6.82	6.17	0,0,0:c1	no-mutants
ELAC1	2.26	2.54	3.47	5.36	12.56	16.36	15.88	15.08	15.78	12.99	0,0,0:c1	probably-unrelated
ABCD3	13.89	24.5	33.03	43.44	10.29	11.72	11.08	11.07	12.23	10.03	0,0,0:c1	probably-unrelated
RNF103	3.87	7.56	12.27	13.52	8	7.94	8.31	7.36	8.98	8.11	0,0,0:c1	probably-unrelated
SP3	22.23	40.59	56.58	71.74	24.21	20.75	23.31	24.51	26.39	26.77	0,0,0:c1	abnormal phalanx morphology
ARL4A	7.35	7.29	12.72	21.39	14.23	21.17	14.89	12.53	18.73	11.8	0,0,0:c1	probably-unrelated
SLC4A2	6.55	13.02	17.38	21.75	42.38	38.67	50.46	38.06	41.18	39.96	0,0,0:c1	abnormal long bone morphology
TMEM30B	0.88	5.75	13.57	7.86	15.76	22.4	20.62	16.96	19.91	15.37	0,0,0:c1	probably-unrelated
AP3B1	11.82	16.68	24.15	32.34	18.14	16.23	17.36	17.31	20.29	18.77	0,0,0:c1	probably-unrelated
PTPRA	19.42	25.53	36.84	49.26	29.6	28.25	30.44	28.78	32.51	27.97	0,0,0:c1	probably-unrelated
NDST2	4.02	10.27	13.33	15.75	27.02	18.12	26.21	26.9	23.81	28.67	0,0,0:c1	probably-unrelated
HDLBP	52.86	64.98	103.08	124.63	141.92	105.64	142.98	128.05	134.46	143.37	0,0,0:c1	no-mutants
HSPG2	7.32	13.11	18.84	21.99	69.98	48.79	62.72	75.22	67.04	71.6	0,0,0:c1	abnormal long bone morphology,short limbs,abnormal femur morphology,abnormal forelimb morphology,abnormal pelvic girdle bone morphology,abnormal humerus morphology,embryonic lethality during organogenesis, incomplete penetrance,abnormal hindlimb morphology
MAML1	7.54	14.8	26.15	27.98	7.31	5.64	7.2	6.42	7.81	7.29	0,0,0:c1	embryonic lethality during organogenesis, complete penetrance
BMF	5.95	18.64	28.7	32.71	7.47	6.58	6.6	7.44	6.5	7.32	0,0,0:c1	probably-unrelated
TRIM36	0.78	0.83	1.68	1.98	2.2	2.3	2.69	1.44	1.7	2.16	0,0,0:c1	no-mutants
FAM13B	6.55	6.8	12.46	16.09	15.25	16	13.5	14.01	17.04	13.37	0,0,0:c1	probably-unrelated
P2RX4	1.3	1.13	1.68	2.94	5.85	8.33	7.19	6.83	7.18	5.05	0,0,0:c1	probably-unrelated
FMNL3	9.18	19.4	29.66	33.93	7.54	5.82	6.56	6.7	7.52	6.93	0,0,0:c1	probably-unrelated
BTBD9	3.52	6.18	10.92	13.36	11.69	10.66	13.57	10.39	11.07	9.99	0,0,0:c1	probably-unrelated
USP32	2.45	3.21	5.93	7.05	11.06	9.93	9.37	9.4	10.91	11.01	0,0,0:c1	no-mutants
ARHGAP1	18.95	36.38	44.73	58.6	4.87	3.82	5.46	3.47	5.03	4.4	0,0,0:c1	probably-unrelated
ITSN1	11.22	14.98	23.87	27.28	19.19	16.38	16.01	17.71	20.84	20.28	0,0,0:c1	probably-unrelated
SNAP29	9.55	13.8	20.27	26.3	22.84	23.96	25.29	21.93	25.75	20.32	0,0,0:c1	probably-unrelated
SMURF1	4.12	9.71	17.83	18.85	5.49	6.27	6.38	5.78	5.36	5.01	0,0,0:c1	embryonic lethality during organogenesis, complete penetrance
FAM171B	2.2	6.84	10.87	11.28	10.65	7.97	9.77	9.76	11	9.48	0,0,0:c1	no-mutants
BC005537	33.03	42.5	60.97	79.84	23.63	27.04	21.76	22.27	25.81	23.4	0,0,0:c1	no-mutants
HIPK2	5.69	5.63	12.74	13.25	33.2	30.23	37.01	33.94	38.09	34.94	0,0,0:c1	probably-unrelated
GALM	5.2	9.56	12.95	16.61	20.06	19.14	19.04	19.77	20.16	18.7	0,0,0:c1	no-mutants
TMEM241	1.06	3.22	4.78	5.29	7.7	8.6	7.75	7.66	8.17	7.54	0,0,0:c1	probably-unrelated
ZFP362	18.61	44.62	76.38	83.85	3.43	3.89	3.83	3.87	3.85	3.09	0,0,0:c1	no-mutants
CCDC92	2.11	3.22	5.87	6.42	5.28	5.22	4.76	4.71	4.96	5.91	0,0,0:c1	probably-unrelated
GPAM	3.93	7.33	10.46	12.55	5.41	4.73	4.97	4.25	5.75	5.32	0,0,0:c1	probably-unrelated
EPHB3	11.78	24.95	45.57	47.51	73.37	59.52	62.56	69.51	71.57	73.74	0,0,0:c1	probably-unrelated
TRP53I13	6.85	15.58	21.55	25.9	6.96	5.85	6.26	6.43	7.36	7.25	0,0,0:c1	no-mutants
LRRC45	5.03	6.5	8.24	9.97	2.36	3.01	3.25	3.07	2.65	2.8	0,0,0:c1	no-mutants
MFSD14B	21.43	23.68	30.54	38.47	7.42	7.65	8.38	7.58	8.94	6.62	0,0,0:c1	no-mutants
PSEN1	18.65	33.85	41.61	47.12	48.83	51.34	61.43	57.43	54.58	53.16	0,0,0:c1	abnormal limb development,hindlimb paralysis,abnormal tail morphology,embryonic lethality, complete penetrance,abnormal limb morphology,embryonic lethality during organogenesis, complete penetrance,abnormal hindlimb morphology
PIP5K1B	0.71	0.71	0.7	1.07	17.81	17.8	18.09	17.18	20.78	15.59	0,0,0:c1	probably-unrelated
ATG13	8.63	15.67	16.46	20.25	28.47	29.48	33.56	32.6	29.68	32.59	0,0,0:c1	no-mutants
FAM210A	7.89	9.25	12.39	14.57	1.11	1.19	1.28	1.22	1.08	1.38	0,0,0:c1	embryonic lethality during organogenesis, complete penetrance,embryonic lethality prior to tooth bud stage,embryonic lethality prior to organogenesis,abnormal limb morphology
NICN1	13.39	24.14	30.64	32.86	3.77	3.5	3.08	3.99	3.84	3.77	0,0,0:c1	no-mutants
GABPA	13.83	23.39	27.53	31.36	50.04	44.18	52.8	53.55	47.75	57.32	0,0,0:c1	embryonic lethality, complete penetrance
CREB1	14.22	18.86	24.66	28.1	24.69	27.17	29.96	29.86	29.68	29.57	0,0,0:c1	probably-unrelated
AI837181	23.34	40.34	47.83	54.95	5.57	4.7	6.97	5.6	3.45	6.44	0,0,0:c1	no-mutants
FIP1L1	28.39	37.44	49.48	54.04	26.3	23.41	24.77	24.95	24.03	26.56	0,0,0:c1	no-mutants
IMMP2L	3.27	2.31	3.44	4.54	3.7	4.89	5.2	4.73	4.68	3.72	0,0,0:c1	probably-unrelated
ACADM	17.83	16.64	24.21	28.6	62.28	70.03	79.92	73.74	72.99	63.77	0,0,0:c1	probably-unrelated
NCK2	15.03	24.01	36.65	35.93	5.13	5.62	5.69	4.9	6.13	4.73	0,0,0:c1	probably-unrelated
TMEM230	16.47	23.58	26.45	33.57	38.14	48.76	48.29	47.04	44.58	40.2	0,0,0:c1	no-mutants
WDR25	2.04	4.43	4.67	5.4	5.02	5.59	5.12	4.87	5.65	5.33	0,0,0:c1	no-mutants
POMGNT2	4.82	6.48	7.36	9.26	8.25	9.35	8.87	8.94	9.75	9.5	0,0,0:c1	probably-unrelated
ERN1	1.91	1.89	2.4	3.23	10.47	9.39	12.36	11.17	12.3	9.71	0,0,0:c1	embryonic lethality during organogenesis, complete penetrance
D16ERTD472E	5.29	6.65	9.21	10.56	8.27	9	12.76	8.83	7.58	8.5	0,0,0:c1	no-mutants
CDK6	2.26	3.87	4.76	5.24	9.09	9.36	9.3	10.27	9.22	10.43	0,0,0:c1	probably-unrelated
PCGF2	19.24	25.69	35.54	38.95	4.86	5.25	5.42	5.59	5.47	5.53	0,0,0:c1	embryonic lethality during organogenesis, complete penetrance
SNX2	43.89	47.6	60.32	74.94	36.48	40.17	35.07	41.32	41.84	37.25	0,0,0:c1	probably-unrelated
CTBS	2.45	2.63	3.45	4.29	21.41	23.3	28.94	21.74	22.39	22.74	0,0,0:c1	probably-unrelated
RNF145	23.07	44.43	54.44	54.35	50.79	46.36	57.83	57.94	56.41	56.78	0,0,0:c1	no-mutants
RFK	26.79	40.7	55.33	57.95	5.63	7.59	6.12	5.91	7.41	5.51	0,0,0:c1	embryonic lethality between implantation and somite formation, complete penetrance
CNN2	132.78	192.1	193.47	252.59	34.53	41.53	45.18	42.93	38.36	41.81	0,0,0:c1	probably-unrelated
MIER2	9.61	13.95	18.01	19.59	3.05	3.53	3.98	3.58	3.53	3.18	0,0,0:c1	no-mutants
GLTP	25.93	47.85	56.16	62.28	5.43	7.28	6.02	5.87	7.26	5.3	0,0,0:c1	no-mutants
WASL	10.13	14.37	20.38	21.94	32.16	27.33	36.07	36.96	27.86	34.51	0,0,0:c1	embryonic lethality during organogenesis, complete penetrance
GPC1	34.91	51.61	69.22	73.62	69.15	54.18	73.06	68.76	67.45	76.31	0,0,0:c1	probably-unrelated
N4BP1	8.21	14.28	19.1	19.22	8.4	8.53	9.24	8.65	10.08	8.08	0,0,0:c1	no-mutants
RNF146	12.59	19.62	23.35	25.27	11.07	12.4	12.55	13.62	12.25	12	0,0,0:c1	probably-unrelated
AP2A1	26.87	59.34	66.83	66.55	40.1	26.52	35.23	33.67	33.83	43.28	0,0,0:c1	no-mutants
IFI30	22.81	26.54	30.48	38.54	12.75	15.03	14.79	14.06	14	13.02	0,0,0:c1	probably-unrelated
CCDC91	10.99	14.12	18.34	20.55	5.14	6.98	5.75	5.28	6.13	4.97	0,0,0:c1	no-mutants
LIG4	3.8	6.52	8.53	7.93	6.38	7.79	7.77	6.45	7.98	5.73	0,0,0:c1	probably-unrelated
ANAPC1	22.04	45.91	57.09	56.89	31.77	21.92	25.76	26.82	27.18	34.34	0,0,0:c1	no-mutants
NPL	4.84	6.6	5.47	7.96	8.52	9.45	8.22	7.75	10.14	7.53	0,0,0:c1	probably-unrelated
CTNNA1	62.69	111.13	145.98	146.57	87.03	90.29	92.94	88.68	91.1	97.49	0,0,0:c1	abnormal limb development,embryonic lethality before implantation, complete penetrance
RNF220	36.65	65.9	81.32	78.41	22.8	25	23.73	23.96	23.57	25.8	0,0,0:c1	no-mutants
JMJD4	6.73	11.18	14.64	15.1	8.58	9.75	9.12	9.42	8.32	9.6	0,0,0:c1	no-mutants
SLC25A32	3.45	3.53	4.78	6.14	2.62	4.73	3.91	3.13	3.5	3.01	0,0,0:c1	embryonic lethality during organogenesis, complete penetrance
ITPK1	4.59	4.82	5.74	7.16	4.59	4.52	5.29	4.31	5.37	3.89	0,0,0:c1	embryonic lethality during organogenesis, incomplete penetrance
BTBD10	7.95	11.51	15.38	16.57	18.26	15.04	17.16	15.4	17.6	17.87	0,0,0:c1	no-mutants
PPIL4	16.43	14.67	21	24.25	15.15	15.25	12.65	15.65	16.18	16.88	0,0,0:c1	no-mutants
AIG1	4.78	5.82	6.27	8.43	7.59	6.32	7.5	6.61	7.09	7.84	0,0,0:c1	no-mutants
GID8	19.76	30.28	38.5	42.81	9.8	11.3	11.78	9.79	11.31	9.09	0,0,0:c1	no-mutants
COG3	7.43	12.14	15.63	16.58	7.99	7.01	7.11	7.72	8.06	8.67	0,0,0:c1	probably-unrelated
CDK17	7.85	9.38	11.94	14.42	14.44	12.73	14.38	13.69	13.95	13.18	0,0,0:c1	no-mutants
ZFP654	4.01	4.3	6.13	7.1	3.05	4.12	3.58	3.72	3.2	2.86	0,0,0:c1	no-mutants
MARCH6	15.23	30.09	38.76	40.2	12.89	11.88	12.66	12.28	12.86	13.81	0,0,0:c1	no-mutants
ACTB	1232.75	1518.83	2082.53	2433.84	4723.96	4557.25	5418.31	4964.39	4141.82	4529.57	0,0,0:c1	embryonic lethality during organogenesis, complete penetrance,embryonic lethality between implantation and somite formation, complete penetrance,embryonic lethality at implantation, complete penetrance
TBKBP1	5.93	12.02	14.5	15.39	3.56	3.13	3.65	3.63	3.28	3.78	0,0,0:c1	probably-unrelated
FAM122A	10.51	13.61	17.38	20.44	15	14.17	14.21	13.8	14.41	15.82	0,0,0:c1	no-mutants
AP4M1	9.17	13.11	17.03	18.67	58.6	54.33	56.08	60.94	49.95	58.79	0,0,0:c1	probably-unrelated
PRR5	16.04	17.39	17.88	26.03	4.69	3.87	5.12	5.25	4.71	3.83	0,0,0:c1	no-mutants
IVD	25.25	54.7	65.72	67.63	26.35	26.53	29.14	27.56	29.57	27.54	0,0,0:c1	probably-unrelated
VIPAS39	17.61	34.08	37.81	41.37	12.06	12.42	12.85	12.81	12.63	12.57	0,0,0:c1	probably-unrelated
SCFD2	2.9	3.9	5.69	5.83	14.69	15.33	14.85	15.87	15.16	15.53	0,0,0:c1	no-mutants
TXNDC11	9.28	13.14	14.63	17.63	10.01	9.5	9.28	9.41	10.43	9.98	0,0,0:c1	no-mutants
SLC25A36	13.96	16.72	22.92	25.52	5.1	6.4	5.84	4.67	6.35	3.71	0,0,0:c1	no-mutants
DOK1	3.99	5.97	7.22	7.98	8.39	8.46	7.96	8.7	7.83	8.2	0,0,0:c1	probably-unrelated
RMND5A	14.03	28.6	38.03	38.76	27.81	29.13	29.04	27.68	28.66	31.4	0,0,0:c1	no-mutants
GAPVD1	15.18	20.89	26.78	30.62	8.41	8.19	8.05	7.75	8.63	8.64	0,0,0:c1	no-mutants
1700047I17RIK2	9.93	8.84	9.79	14.51	30.08	28.95	29.07	28.54	31.2	33.47	0,0,0:c1	no-mutants
LDB1	72.13	107.43	134.52	147.05	58.57	52.43	56.83	57.57	52.65	61.73	0,0,0:c1	embryonic lethality, complete penetrance
VPS37A	4.05	4.85	5.74	7.13	28.03	32.37	31.41	30.85	31.46	27.4	0,0,0:c1	no-mutants
STK38L	4.51	8.01	10.86	10.62	5.14	6.63	6.71	6.45	4.73	4.33	0,0,0:c1	probably-unrelated
LEMD2	10.5	13.51	18.41	20.52	14.32	12.76	12.81	12.9	16.52	13.7	0,0,0:c1	embryonic lethality during organogenesis, complete penetrance
PQLC1	6.74	8.31	10.54	12.9	4.75	5.81	5.7	5.17	6.07	3.99	0,0,0:c1	no-mutants
ZFP821	13.61	21.92	29.28	31.85	13.38	14.54	14.34	14.63	14.72	14.65	0,0,0:c1	no-mutants
FUK	2.98	9.04	12.18	10.81	4.48	4.82	3.98	5.56	4.27	5.14	0,0,0:c1	no-mutants
FRMD4B	7.47	6.6	9.47	12.52	7.38	8.61	6.84	6.85	8.77	9	0,0,0:c1	probably-unrelated
THUMPD2	4.68	6.61	7.27	9.25	8.44	10.35	7.7	7.29	10.48	8.02	0,0,0:c1	no-mutants
SPG21	42.01	60.82	69.13	88.77	9.24	9.31	8.6	8.38	10.71	8.33	0,0,0:c1	no-mutants
EVL	47.66	87.06	117.91	121.61	61.17	57.66	54.57	63.47	64.27	65.58	0,0,0:c1	probably-unrelated
MORC3	9.53	8.63	11.04	13.76	2.24	2.53	1.88	2.36	2.51	2.63	0,0,0:c1	probably-unrelated
CHM	6.6	7.21	9.41	11.71	17.44	18.86	18.94	17.53	19.8	16.33	0,0,0:c1	embryonic lethality during organogenesis, complete penetrance
SAMD1	37.34	53.25	62.66	76.86	7.8	6.32	7.04	7.7	7.27	7.91	0,0,0:c1	no-mutants
STRIP1	21.02	37.61	49.22	51.06	17.33	16.42	16.75	17.41	18.12	18.61	0,0,0:c1	embryonic lethality, complete penetrance
TRIM32	13.12	34.47	37.53	41.19	12.97	13.23	14.7	13.04	11.86	14.07	0,0,0:c1	probably-unrelated
CTNNB1	359.8	688.49	836.64	875.23	451.16	412.34	477.3	492.42	483.19	481.52	0,0,0:c1	abnormal limb development,abnormal humerus morphology,fused phalanges,embryonic lethality between implantation and somite formation, complete penetrance,brachydactyly,abnormal digit morphology,abnormal ulna morphology,abnormal autopod morphology,embryonic lethality during organogenesis, incomplete penetrance,abnormal long bone morphology,embryonic lethality, complete penetrance,short limbs,embryo…
RMDN1	4.06	2.99	4.27	5.51	14.77	16.77	13.21	14.42	16.72	15.13	0,0,0:c1	no-mutants
RNF113A1	6.12	7.63	8.99	11.57	40.16	42.89	45.63	42.83	42	36.64	0,0,0:c1	no-mutants
RGS12	8.18	18.67	25.39	25.67	6.43	6.3	6.06	6.05	7.12	5.64	0,0,0:c1	probably-unrelated
FAM135A	3.88	5.46	8.5	8.68	30.5	32.2	36.17	30.13	32.67	24.07	0,0,0:c1	no-mutants
CRYM	21.37	10.23	13.42	23.17	8.95	10.47	10.07	8.98	11.25	9.2	0,0,0:c1	probably-unrelated
ATP6V0A2	8.41	15.65	19.32	21.76	2.61	3.3	2.93	2.78	3.02	2.52	0,0,0:c1	no-mutants
REEP1	5.52	7.29	5.82	9.57	5.65	5.8	6.78	6.03	6.59	4.81	0,0,0:c1	probably-unrelated
ILVBL	6.32	11.3	14.19	15.41	11.82	7.99	10.26	8.97	9.69	12.74	0,0,0:c1	no-mutants
LCLAT1	5.15	9.27	10.62	12.4	11.98	8.57	11.77	11.9	12.12	11.96	0,0,0:c1	probably-unrelated
BLVRA	15.27	17.91	21.36	28.92	15.71	19.88	21.15	18.95	18.34	14.8	0,0,0:c1	probably-unrelated
NEIL3	3.42	4.19	7.65	6.79	1.8	1.74	1.66	1.26	2.17	1.4	0,0,0:c1	probably-unrelated
DPF3	1.26	0.74	1.29	1.74	3.39	3.04	3.79	2.69	2.92	3.03	0,0,0:c1	probably-unrelated
NCDN	9.19	17.39	21.69	23.68	4.71	4.25	4.37	4.05	4.74	5.02	0,0,0:c1	embryonic lethality between implantation and somite formation, complete penetrance
KRAS	18.65	35.07	39.51	45.13	32.37	34.66	36.16	36.26	31.93	32.6	0,0,0:c1	embryonic lethality, complete penetrance,embryonic lethality during organogenesis, complete penetrance,embryonic lethality, incomplete penetrance,embryonic lethality during organogenesis, incomplete penetrance
RANBP9	14.01	20.94	26.43	30.07	10.89	10.05	10.8	10.63	10.77	10.83	0,0,0:c1	probably-unrelated
IKZF2	0.54	0.66	0.7	1.09	7.02	7.99	7.51	7	7.66	6.74	0,0,0:c1	probably-unrelated
GNA13	8.26	15.83	19.91	23	7.39	7.13	7.87	7.6	7.46	7.68	0,0,0:c1	embryonic lethality during organogenesis, complete penetrance,embryonic lethality during organogenesis, incomplete penetrance
SNX16	3.52	4.01	5.63	7.05	5.91	6.48	6.08	5.58	7	4.14	0,0,0:c1	no-mutants
DIP2B	3.47	5.28	8.36	8.77	62.65	38.68	54.68	66.79	41.46	67.66	0,0,0:c1	probably-unrelated
1810013L24RIK	8.72	12.45	18.95	20.27	65.01	62.6	68.81	66.78	66.44	69.77	0,0,0:c1	no-mutants
GRAMD1C	0.69	1.1	1.8	1.9	6.05	7.43	6.11	6.95	7.62	5.63	0,0,0:c1	no-mutants
WDTC1	8.57	19.39	25.29	26.52	17.66	14.72	17.48	15.5	17.03	18.47	0,0,0:c1	probably-unrelated
MLYCD	4.66	5.74	5.31	8.98	12.04	11.08	12.16	11.16	11.48	11.74	0,0,0:c1	probably-unrelated
TCTE2	0.68	0.56	0.48	1.04	1.1	1.25	1.35	0.93	1.33	1.09	0,0,0:c1	no-mutants
SMAD7	3.75	4.16	7.39	7.34	14.8	12.42	12.45	13.66	14.68	14.99	0,0,0:c1	probably-unrelated
GDPD1	5.57	10.95	15.76	16.4	2.07	1.86	1.57	2.01	1.8	2.15	0,0,0:c1	no-mutants
NUMB	7.17	10.94	15.45	16.14	11.22	9.19	11.32	10.97	11.32	11.13	0,0,0:c1	embryonic lethality during organogenesis, complete penetrance
MAP4K2	1.79	2.51	3.01	3.82	9.7	9.08	10.11	9.7	9.45	8.04	0,0,0:c1	no-mutants
ITGA9	7.23	9.44	12.7	15.02	29.26	20.18	26.68	23.8	25.03	30.62	0,0,0:c1	probably-unrelated
OCRL	3.59	8.57	12.33	12.52	9.46	9.56	10.19	8.87	10.74	8.86	0,0,0:c1	probably-unrelated
STAG2	29.48	34.65	45.78	56.71	37.3	36.55	37.56	35.24	41.53	32.22	0,0,0:c1	no-mutants
SIMC1	3.89	3.98	5.72	7.21	4.37	4.09	4.5	4.26	4.31	4.32	0,0,0:c1	no-mutants
GPATCH2L	3.66	7.38	9.71	10.91	143.96	153.5	139.77	135.29	165.32	118.39	0,0,0:c1	no-mutants
PDIK1L	4.12	5.25	8.3	9.29	6.49	7.97	6.92	5.88	7.88	6.14	0,0,0:c1	no-mutants
FSBP	0.67	0.66	1.35	0.9	1.7	1.5	1.32	1.52	1.97	1.43	0,0,0:c1	no-mutants
SGSM3	4.11	7.27	7.84	9.85	17.42	15.39	15.39	15.3	16.54	17.82	0,0,0:c1	no-mutants
ARRDC3	22.64	32.82	42.28	53	30.11	39.2	28.48	28.14	38.73	31.97	0,0,0:c1	embryonic lethality, complete penetrance
GPX8	99.45	96.16	118.74	167.77	41.03	40.9	47.1	42.66	46.34	44.59	0,0,0:c1	probably-unrelated
FANCF	4.89	9.36	8.65	11.56	3.35	3.17	2.89	2.43	2.57	3.78	0,0,0:c1	probably-unrelated
TCF25	48.43	70.93	97.23	110.33	19.42	19.45	20.66	22.11	21.3	22.13	0,0,0:c1	no-mutants
MKRN1	12.65	14.18	20.62	26.04	37.86	49.88	44.69	47.64	41.41	38.36	0,0,0:c1	probably-unrelated
CTDSPL2	12.37	17.03	23.81	27.67	68.94	63.57	74.81	69.79	75.99	74.41	0,0,0:c1	probably-unrelated
SLC26A11	1.23	1.49	1.8	2.51	4.03	3.9	5.31	3.67	3.72	4.03	0,0,0:c1	probably-unrelated
JADE1	3.97	4.54	6.27	7.51	2.8	2.11	3.01	2.7	2.65	2.93	0,0,0:c1	probably-unrelated
ST3GAL3	9.15	13.99	17.59	21.9	3.48	4.59	3.23	3.67	4.12	3.63	0,0,0:c1	no-mutants
MCUR1	3.01	5.14	6.76	7.67	12.08	13.31	11.46	11.88	13.79	12.45	0,0,0:c1	probably-unrelated
SMAD6	6.25	10.11	13	15.35	25.6	20.47	22.54	23.33	23.7	27.75	0,0,0:c1	probably-unrelated
IFNGR1	11.5	13.62	19.67	23.28	11.1	11.11	11.81	11.4	12.84	10.81	0,0,0:c1	probably-unrelated
MOSPD2	4.16	5.43	6.23	8.36	13.87	15	14.67	13.44	16.6	12.36	0,0,0:c1	no-mutants
MBOAT7	10.89	22.7	26.88	31.72	110.82	84.11	101.01	99.83	97.56	123.23	0,0,0:c1	probably-unrelated
SPRED2	13.51	18.39	23.34	29.58	14.29	10.85	13.91	13.72	14.33	15.7	0,0,0:c1	probably-unrelated
ELL3	2.17	2.43	3.28	4.26	3.21	4.18	3.38	3.54	3.99	3.29	0,0,0:c1	no-mutants
ADAM17	15	20.85	26.29	31.96	52.86	47.51	52.1	52.4	56.81	58.04	0,0,0:c1	probably-unrelated
YTHDC2	2.64	2.83	3.68	4.94	6.53	7.55	8.63	5.85	8.16	4.99	0,0,0:c1	probably-unrelated
SLC12A7	7.91	19.55	27.05	22.86	37.58	32.56	45.08	35.5	38.62	35.27	0,0,0:c1	probably-unrelated
SLC35F5	12.36	16.53	21.22	26.89	4.25	4.23	4.43	4	5.07	3.5	0,0,0:c1	no-mutants
TMEM119	33.75	118.23	167.34	166.12	80.45	57.46	72.85	70.87	82.29	86.05	0,0,0:c1	probably-unrelated
TADA2B	4.04	7.84	11.67	11.88	3.76	2.83	3.66	3.03	3.08	4.36	0,0,0:c1	no-mutants
GRAMD3	6.65	9.03	12.27	15.62	16.51	18.83	18.51	15.85	21.22	15.43	0,0,0:c1	no-mutants
PDGFRB	14.24	30.86	44.38	47.31	9.87	8.29	9.43	8.9	8.17	11.32	0,0,0:c1	clinodactyly
RTKN	6.31	13.32	21.42	27.66	1.12	3.69	2.27	1.79	2.53	1.52	0,0,0:c1	no-mutants
BEND5	8.98	16.53	20.5	25.13	17.52	21.12	21.44	19.16	21.09	14.41	0,0,0:c1	no-mutants
SEC24A	2.3	2.7	3.99	4.77	16.92	15.87	17.24	16.04	18	18.56	0,0,0:c1	probably-unrelated
RFXANK	4.96	6.98	11.08	13.04	1.5	2.05	1.84	2.09	1.69	1.57	0,0,0:c1	no-mutants
PDPK1	6.04	9.68	13.82	16.07	16.03	15.54	15.84	16.38	16.4	16.56	0,0,0:c1	embryonic lethality during organogenesis, complete penetrance,abnormal forelimb morphology
2010111I01RIK	10.85	10.63	16.09	20.84	3.81	3.67	3.66	3.55	4.26	4.11	0,0,0:c1	probably-unrelated
B3GNT2	6.4	6.95	8.34	13.06	4.28	4.6	4.93	4.67	5.41	3.65	0,0,0:c1	probably-unrelated
MTMR6	10.26	10.85	16.15	20.67	17.21	17.22	17.26	14.7	19.81	15.87	0,0,0:c1	no-mutants
APLF	3.36	4.51	5.86	7.29	10.5	9.48	11.04	9.48	11.42	10.82	0,0,0:c1	probably-unrelated
NARF	10.36	23.44	33.84	39.11	15.04	25.33	16.08	18.09	15.61	18.24	0,0,0:c1	no-mutants
TMLHE	4.26	5.19	6.58	9.15	8.58	11.32	11.39	9.64	10.32	7.77	0,0,0:c1	no-mutants
UBE2O	9.54	13.18	19.98	21.63	8.87	8.17	7.62	6.5	9.83	9.27	0,0,0:c1	probably-unrelated
PPP1R16B	0.76	0.94	1.15	1.54	0.93	0.87	0.75	0.93	0.9	1.03	0,0,0:c1	probably-unrelated
PCGF3	17.38	32.13	42.79	48.52	4.78	4.14	4.41	4.48	4.74	4.69	0,0,0:c1	probably-unrelated
BAHCC1	4.77	5.13	9.96	10.66	3.05	4	3.9	3.54	2.84	2.94	0,0,0:c1	probably-unrelated
VPS4A	29.6	46.58	60.47	73.4	65.95	64.12	70.38	68.9	68.44	70.12	0,0,0:c1	probably-unrelated
TCP11L1	1.7	2.9	4.75	4.83	5.67	5.09	6.23	5.26	5.39	4.93	0,0,0:c1	no-mutants
MLLT3	7.3	7.99	13.16	14.74	129.35	125.39	127.11	110.32	122.55	106.56	0,0,0:c1	probably-unrelated
AMMECR1	5.62	7.24	10.8	13.05	6.87	7.77	6.71	6.42	7.01	6.27	0,0,0:c1	no-mutants
KIFAP3	28.44	39	58.16	68.94	30.84	33.78	29.56	28.69	35.43	24.11	0,0,0:c1	probably-unrelated
RIC8B	4.95	9.98	13.7	14.25	4.43	3.57	3.6	3.04	2.9	4.63	0,0,0:c1	probably-unrelated
KLC1	24.01	38.42	51.49	60.25	50.14	35.25	41.08	41.06	38.14	50.1	0,0,0:c1	probably-unrelated
PGM1	11.3	19.44	23.26	29.37	32.17	32.12	32.61	29.28	31.74	28.69	0,0,0:c1	no-mutants
EPN2	8.37	12.1	14.42	18.35	10.86	8.72	8.84	9.97	11.06	9.4	0,0,0:c1	probably-unrelated
GPBP1L1	9.01	6.28	10.66	14.21	13.77	13.09	12.46	11.85	13.38	10.96	0,0,0:c1	no-mutants
CBFA2T2	6.38	11.89	15.54	18.41	5.94	5.95	5.8	5.92	4.47	5.14	0,0,0:c1	probably-unrelated
HTATSF1	22.82	32	47.23	53.12	15.63	15.2	15.11	13.69	14.91	12.15	0,0,0:c1	no-mutants
GPSM2	13.77	26.93	37.47	41.78	16.36	14.73	15.64	14.29	15.72	14.29	0,0,0:c1	probably-unrelated
WDR41	6.1	9.39	12.96	15.17	5.06	5.12	4.23	5.17	5.59	3.72	0,0,0:c1	no-mutants
ATXN7L1	4.89	7.07	9.8	11.24	3.69	3.42	3.51	3.09	3.21	3.38	0,0,0:c1	no-mutants
MAPKAP1	14.36	26.62	33.62	40.2	18.21	17.39	18.27	17.67	16.79	15.74	0,0,0:c1	embryonic lethality prior to tooth bud stage
ENAH	11.98	17.24	23.92	28.84	10.43	12.05	10.72	9.94	10.59	8.3	0,0,0:c1	probably-unrelated
WDR26	17.33	30.6	43.06	47.43	64.21	56.1	66.29	60.88	59.81	60.21	0,0,0:c1	no-mutants
ATF2	14.54	23.42	34.56	37.4	5.01	5.14	5.03	4.33	5.24	4.43	0,0,0:c1	short limbs,embryonic lethality during organogenesis, complete penetrance
ST3GAL5	12.76	16.66	20.84	26.31	10.4	9.08	9.75	8.41	10.33	9.53	0,0,0:c1	probably-unrelated
NR2F2	15.92	15.47	26.62	30.31	26.57	30.74	36.06	29.71	22.82	26.23	0,0,0:c1	embryonic lethality, complete penetrance,embryonic lethality during organogenesis, complete penetrance,embryonic lethality, incomplete penetrance
TRAPPC12	11.66	16.89	22.1	26.47	9.78	10.34	10.91	9.06	10.84	8.91	0,0,0:c1	no-mutants
ACTR3B	2.08	1.53	2.08	3.18	1	1.06	1.29	0.95	0.77	0.74	0,0,0:c1	no-mutants
KLHL15	1.44	1.21	1.82	2.38	10.75	12.8	12.82	10.5	11.77	9.54	0,0,0:c1	no-mutants
RSBN1L	3.31	3.36	5.53	6.37	9.44	9.48	8.71	8.08	9.37	8.43	0,0,0:c1	no-mutants
TYK2	2.1	4.54	6.08	6.32	17.89	15.3	17.42	15.42	15.8	16.48	0,0,0:c1	probably-unrelated
CCDC126	2.74	2.18	3.15	4.55	9.28	11.16	11.16	8.84	10.39	7.65	0,0,0:c1	no-mutants
PHIP	6.73	7.81	12.23	13.75	13.57	12	12.62	12.57	12.78	12.07	0,0,0:c1	probably-unrelated
IFT57	7.19	8.2	9.74	13.13	30.2	28.41	21.97	25.36	30.18	30.02	0,0,0:c1	polydactyly,embryonic lethality during organogenesis, incomplete penetrance
TBC1D10B	10.63	23.55	32.27	33.15	20.67	12.65	16.92	19.93	13.47	20.15	0,0,0:c1	no-mutants
SETD4	1.67	2.37	3.38	3.66	4.71	4.44	3.94	3.9	5.31	4.09	0,0,0:c1	probably-unrelated
CDKAL1	3.83	2.11	3.65	5.2	16.71	16.15	15.15	13.5	15.96	12.35	0,0,0:c1	probably-unrelated
ZFP217	5.85	7.57	10.6	12.17	7.65	6.68	7.08	6.57	7.55	6.43	0,0,0:c1	no-mutants
WDPCP	3.31	4.4	5.93	7.01	3.13	2.87	2.34	2.7	2.84	2.95	0,0,0:c1	polydactyly
TMEM254B	36.05	47.35	62.47	78.21	42.83	50.36	46.38	50.57	37.53	29.33	0,0,0:c1	probably-unrelated
POFUT1	8.95	17.05	18.03	21.39	69.45	47.44	69.04	59.86	44.39	71.95	0,0,0:c1	embryonic lethality during organogenesis, complete penetrance
CCDC174	15.32	16.08	23.33	26.09	25.19	19	23.04	21.5	22.37	24.99	0,0,0:c1	embryonic lethality between implantation and somite formation
RBM15B	23.11	42.65	57.17	57.73	10.03	8.73	9.33	8.85	8.91	10.38	0,0,0:c1	no-mutants
MXRA7	13.31	17.8	21.07	24.56	104.17	79.52	90.3	86.88	85	106.9	0,0,0:c1	probably-unrelated
RXRB	21.36	39.03	48.17	50.94	5.85	3.72	4.38	4.57	5.65	5.84	0,0,0:c1	probably-unrelated
FBXW9	5.88	9.97	12.12	13.12	12.49	10.3	11.62	11	10.58	12.31	0,0,0:c1	probably-unrelated
VEZF1	16.45	27.72	36.96	40.6	13.23	15.92	13.66	13.33	14.02	11.24	0,0,0:c1	probably-unrelated
MAP3K1	4.35	3.9	5.69	6.84	17.76	16.75	17.93	15.47	16.7	12.14	0,0,0:c1	probably-unrelated
KIF1BP	14.71	24.33	32.65	34.09	58.36	51.37	60.21	54.39	47.71	56.52	0,0,0:c1	probably-unrelated
SLC25A40	1.54	1.48	1.99	2.52	22.73	25.57	21.58	20.22	24.39	19.59	0,0,0:c1	probably-unrelated
ZFP459	0.69	0.93	1.07	1.29	5.38	4.14	5.16	4.4	4.53	5.32	0,0,0:c1	probably-unrelated
WDFY2	4.07	5.3	6.56	8.01	6.45	5.7	6.59	6.11	6.21	5.96	0,0,0:c1	no-mutants
LCA5	2.92	3.77	5.22	5.73	2.54	2.47	2.82	2.53	2.61	2.26	0,0,0:c1	probably-unrelated
FAM217B	1.97	3.94	5.01	4.5	3.8	2.4	2.53	3.77	2.4	3.94	0,0,0:c1	no-mutants
EGLN1	23.38	43.51	45.73	54.21	4.67	4.68	5.46	3.83	3.9	5.29	0,0,0:c1	embryonic lethality during organogenesis, complete penetrance
SYAP1	16.71	25.23	34.2	40.58	22.22	26.22	22.1	21.11	21.96	16.63	0,0,0:c1	no-mutants
ROGDI	13.35	21.2	32.3	33.12	8.6	9.07	7.22	8.68	8.47	6.46	0,0,0:c1	no-mutants
LIG3	12.82	18.11	25.21	28.21	17.48	14.92	16.35	14.75	15.6	15.36	0,0,0:c1	embryonic lethality between somite formation and embryo turning, incomplete penetrance,embryonic lethality between implantation and somite formation, incomplete penetrance
TRP53BP2	11.8	17.84	25.14	26.97	9.38	8.01	9.72	8.67	8.98	8	0,0,0:c1	embryonic lethality, complete penetrance,embryonic lethality prior to tooth bud stage,embryonic lethality prior to organogenesis
AP5S1	4.26	7.96	10.06	11.14	32.83	30.68	33.98	31.89	28.78	29.44	0,0,0:c1	no-mutants
UHRF1BP1L	3.18	4.32	6.28	6.73	10.19	9.54	9.52	9.17	10.34	8.37	0,0,0:c1	no-mutants
UAP1	14.05	23.57	24.73	31.91	15.13	14.52	12.03	13.99	15.03	13.04	0,0,0:c1	no-mutants
GMEB1	5.61	8.26	11.21	12.29	46.6	38.22	45.32	40.01	38.63	47.1	0,0,0:c1	no-mutants
TMEM43	17.65	37.57	43.74	48.69	39.94	30.27	33.21	35.04	31.21	37.08	0,0,0:c1	probably-unrelated
CABLES2	7.44	13.81	17.52	18.69	4.27	4.22	4.33	4.18	3.98	3.73	0,0,0:c1	no-mutants
TRIP4	6.49	7.79	10.9	12.96	26.5	24.94	28.32	25.67	22.14	22.92	0,0,0:c1	no-mutants
GAS8	16.3	19.06	24.23	30.79	8.93	8	7.96	7.6	8.7	6.96	0,0,0:c1	probably-unrelated
RNF168	15.72	10.62	17.95	23.45	20.77	19.72	20.04	17.58	20.53	17.61	0,0,0:c1	probably-unrelated
ZNRF1	6.53	14.12	18.92	19.59	4.09	3.99	3.81	3.64	4.28	3.27	0,0,0:c1	no-mutants
EXOC3	16.23	25.18	30.78	36.34	13.27	12.88	12.61	11.12	13.63	11.47	0,0,0:c1	no-mutants
STK40	13.24	24.64	32.45	34.3	28.05	25.27	29.08	26.34	28.12	24.02	0,0,0:c1	probably-unrelated
BC017158	6.44	13.05	14.22	16.53	57.19	36.75	47.45	45.98	36.06	59.58	0,0,0:c1	no-mutants
WIPF2	3.84	6.78	9.26	9.2	11.55	9.7	9.48	8.9	11.34	10.61	0,0,0:c1	no-mutants
SUMF2	20.16	26.18	34.81	40.78	13.93	18.41	16.84	16.36	14.94	12.08	0,0,0:c1	no-mutants
MCC	0.97	0.78	1.18	1.52	3.07	3.34	3.29	2.81	3.39	3.18	0,0,0:c1	probably-unrelated
UBXN4	15.27	17.86	24.17	28.8	29.92	28.54	27.14	26.65	28.66	27.06	0,0,0:c1	no-mutants
ZFP950	4.47	3.81	5.2	7.22	9.7	8.66	10.56	8.18	7.56	9.42	0,0,0:c1	probably-unrelated
FER	7.61	9.01	11.09	13.84	5.07	4.52	4.83	4.44	5.11	4.67	0,0,0:c1	probably-unrelated
CCDC134	8.34	6.03	7.35	11.32	34.25	47.05	45.22	36.44	44.05	30.12	0,0,0:c1	embryonic lethality during organogenesis, complete penetrance
GNPDA2	8.46	10.92	15.87	18.34	35.92	46.03	44.14	37.17	41.67	29.5	0,0,0:c1	no-mutants
CDR2L	4.75	7.28	11.07	11.45	14.93	11.84	15.4	12.76	12.79	15.03	0,0,0:c1	no-mutants
SH2B1	15.2	29.41	35.34	40.71	19.49	12.64	15.96	14.79	13.3	20.26	0,0,0:c1	probably-unrelated
MBNL1	5.95	5.44	7.31	10.55	2.95	3.55	2.92	1.56	3.11	3.37	0,0,0:c1	probably-unrelated
FAF2	27.16	38.96	46.05	55.67	19.84	18.22	20.6	19.05	20.79	17.51	0,0,0:c1	probably-unrelated
ABHD18	1.36	1.69	1.83	2.68	30.47	28.43	28.66	27.69	28.87	25.87	0,0,0:c1	no-mutants
COG6	11.07	18.39	22.04	27.43	18.42	17.73	19.35	17.79	19.34	16.4	0,0,0:c1	probably-unrelated
AP1B1	15.15	23.32	31.44	35	70.07	72.75	79.73	69.62	70.37	74.12	0,0,0:c1	probably-unrelated
KDSR	6.16	4.26	5.91	8.98	13.76	12.98	14.61	12.35	14.04	11.31	0,0,0:c1	no-mutants
OGFOD1	3.75	5.61	6.99	8.5	30.88	31.27	31.88	30.52	31.13	27.16	0,0,0:c1	abnormal femur morphology
ST8SIA4	3.11	2.55	2.83	4.56	4.08	3.64	4.02	3.67	3.91	2.44	0,0,0:c1	probably-unrelated
ST3GAL2	10.51	21.26	29.39	30.15	30.89	27.12	33.43	31.77	31.86	27.88	0,0,0:c1	probably-unrelated
JMY	3.89	5.56	7.86	8.54	12.82	13.63	11.71	12.28	13.29	11.37	0,0,0:c1	no-mutants
PIK3C3	10.7	13.06	17.36	21.37	16.85	18.51	15.88	15.34	17.88	14.4	0,0,0:c1	embryonic lethality between implantation and placentation, complete penetrance
TXLNA	26.57	41.79	54.53	63.23	8.32	8.08	7.42	6.82	9.4	6.46	0,0,0:c1	no-mutants
CDCP1	1.67	1.47	1.61	2.63	4.54	3.91	4.35	3.27	4.1	4.16	0,0,0:c1	probably-unrelated
GPALPP1	10.08	13.8	17.97	20.68	48.5	42.16	47.08	41.91	39.03	46.46	0,0,0:c1	no-mutants
UBA5	23.01	27.18	32.13	39.8	35.68	34.64	27.74	30.82	31.44	38.16	0,0,0:c1	embryonic lethality during organogenesis, complete penetrance
ATP1B1	2.93	1.64	2.51	3.72	70.55	71.02	67.11	66.36	72.66	63.89	0,0,0:c1	probably-unrelated
RBMS1	19.76	21.58	30.45	36.36	7.53	9.69	7.47	8.2	8.09	5.98	0,0,0:c1	embryonic lethality during organogenesis, incomplete penetrance
HGS	14.39	21.46	33.85	38.9	17.25	13.21	16.31	12.88	14.31	16.77	0,0,0:c1	embryonic lethality, complete penetrance,embryonic lethality during organogenesis, complete penetrance,embryonic lethality between implantation and somite formation
HIP1R	2.24	2.64	4.05	4.9	7.58	6.68	5.67	6.39	8.11	7.37	0,0,0:c1	probably-unrelated
INO80D	1.57	1.57	2.85	3.45	2.67	2.43	2.5	2.24	2.51	2.33	0,0,0:c1	no-mutants
PXMP4	4.36	8.85	12.18	14.99	12.59	12.25	12.09	11.24	12.75	10.24	0,0,0:c1	no-mutants
PCCB	25.48	33.21	50.45	62.1	32.83	31.86	35.77	30.43	31.6	30.53	0,0,0:c1	embryonic lethality prior to tooth bud stage
LRRC75B	0.44	0.52	1.24	1.12	10.41	9.3	10.22	8.84	11.04	8.82	0,0,0:c1	no-mutants
TAB1	7.76	11.46	17.94	21.42	15.29	11.88	13.51	12.72	11.37	15.63	0,0,0:c1	probably-unrelated
ANKS1	4.1	7.46	12.12	12.84	7.56	7.49	7.43	7.32	7.91	6.94	0,0,0:c1	probably-unrelated
CRYL1	6.91	10.18	18.08	19.68	13.29	13.59	13.36	12.41	12.93	10.77	0,0,0:c1	no-mutants
SBF2	4.5	6.66	11.23	12.57	7.59	6.25	6.59	6.75	7	6.73	0,0,0:c1	probably-unrelated
TCTN1	1.44	1.85	2.21	3.22	8.1	6.55	5.28	6.48	8	7.71	0,0,0:c1	preaxial polydactyly
AMOT	13.25	39.55	69.39	75.47	12.34	12.01	12.76	11.54	12.39	9.31	0,0,0:c1	embryonic lethality between implantation and somite formation, incomplete penetrance,embryonic lethality during organogenesis, incomplete penetrance
PINK1	10.31	25.93	46.19	46.52	32.59	27.73	31.5	28.85	27.81	29.74	0,0,0:c1	hindlimb paralysis
FAM171A2	8.89	21.98	33.04	37.36	16.88	10.97	14.4	13.48	12.3	17.32	0,0,0:c1	no-mutants
TMEM38B	1.67	3.01	4.69	5.48	8.78	7.87	8.45	8.11	9.69	7.37	0,0,0:c1	probably-unrelated
GRK4	1.95	1.03	1.87	3.26	7.08	7.65	6.49	6.92	7.8	7.24	0,0,0:c1	probably-unrelated
IRAK4	0.84	1.01	1.22	2.07	5.98	6.85	5.93	4.94	7.71	4.86	0,0,0:c1	probably-unrelated
JAK2	4.37	6.91	10.2	13.2	2.54	3.02	2.23	2.46	2.72	2.61	0,0,0:c1	embryonic lethality, complete penetrance,embryonic lethality during organogenesis, complete penetrance
SLAIN1	0.61	1.39	3.52	2	1.62	0.95	1.44	1.48	1.27	1.43	0,0,0:c1	no-mutants
RNF20	14.87	16.82	30.81	35.81	35.21	29.77	33.63	31.01	31.87	33.37	0,0,0:c1	embryonic lethality prior to organogenesis
MYO1B	17.48	27.79	43.43	50.16	38.19	34.25	35.57	36.96	42.5	35.62	0,0,0:c1	no-mutants
FBXL16	1.17	1.62	2.06	3.09	10.25	8.92	9.58	9.54	11.42	7.14	0,0,0:c1	probably-unrelated
SEC31A	31.03	40.74	59.12	78.07	20.75	18.58	19.04	17.53	21.49	20.5	0,0,0:c1	no-mutants
KLHL36	1.34	3.18	3.84	5.14	3.63	3.77	3.43	3.28	3.79	3.22	0,0,0:c1	no-mutants
KBTBD11	1.32	2.68	4.54	5.07	11.97	8.64	12.04	10.72	9.8	12.02	0,0,0:c1	no-mutants
FMR1	16.5	20.35	29.58	37.16	10.14	8.21	7.63	8.45	11.23	10.75	0,0,0:c1	probably-unrelated
OXR1	18.69	17.79	29.81	38.15	24.64	22.27	21.4	21.76	21.55	23.21	0,0,0:c1	probably-unrelated
PRRG1	2.59	4.12	4.77	7.5	10.18	12.68	10.68	9.77	11.97	8.69	0,0,0:c1	no-mutants
OVOL2	0.87	0.65	1.54	1.79	9.02	7.76	7.45	6.93	10.28	8.7	0,0,0:c1	embryonic lethality during organogenesis, complete penetrance
ZFP629	6.66	10.29	18.3	20.5	198.71	133.47	185.24	165.45	142.72	191.07	0,0,0:c1	no-mutants
USP22	32.01	56.29	82.44	102.27	5.99	5.69	6.25	5.81	5.54	5.19	0,0,0:c1	embryonic lethality during organogenesis, complete penetrance
SOS1	3.65	5.15	9.12	10.8	13.96	14.12	13.52	12.25	15.35	12.21	0,0,0:c1	embryonic lethality during organogenesis, complete penetrance,embryonic lethality during organogenesis, incomplete penetrance
GULP1	8.94	13.69	23.13	26.58	14.18	13.95	13.3	12.83	16.53	12.64	0,0,0:c1	no-mutants
DNAJB5	3.95	8.42	8.69	11.93	6.76	5.64	6.42	4.94	6.88	6.2	0,0,0:c1	no-mutants
SNX33	3.36	7.75	11.57	12.25	11.02	8.14	9.72	8.94	10.51	9.7	0,0,0:c1	no-mutants
TRIM62	3.38	7.69	13.19	12.86	32.9	31.85	31.59	30.81	27.47	31.62	0,0,0:c1	probably-unrelated
LONRF1	2.34	3.44	5.48	6.35	8.97	8.1	9.15	7.79	7.6	9.13	0,0,0:c1	no-mutants
WDSUB1	2.66	7.47	11.14	11.72	10.82	11.05	10.52	9.9	10.71	9.01	0,0,0:c1	no-mutants
BRMS1L	11.53	18.88	23.16	31.41	21.47	19.55	16.52	18.3	19.81	18.6	0,0,0:c1	no-mutants
CDKL1	1.03	1.09	1.1	2.05	5.41	5.68	5.59	5.46	5.98	3.84	0,0,0:c1	no-mutants
FN3KRP	3.65	6.85	11.19	12.36	21.61	28.35	21.87	22.25	25.46	19.4	0,0,0:c1	no-mutants
SIRT2	16.53	37.47	51.22	58.41	25.58	23.16	25.08	24.95	22.62	24.6	0,0,0:c1	probably-unrelated
TAF1	6.49	6.42	11.22	13.78	8.13	8.13	7.72	6.85	9.16	7.19	0,0,0:c1	no-mutants
TMEM184B	13.4	24.67	33.92	41.99	11.02	6.7	9.62	9.62	7.34	11.3	0,0,0:c1	probably-unrelated
NDST1	9.72	22.63	31.03	36.37	19.92	16.1	20.57	18.51	16.67	20.91	0,0,0:c1	probably-unrelated
PPM1K	0.81	0.99	1.63	1.92	4.17	3.89	3.96	3.11	4.39	4.04	0,0,0:c1	probably-unrelated
PTK7	47.68	62.26	106.32	118.08	69.31	58.78	56.88	56.73	62.18	73.61	0,0,0:c1	polydactyly,preaxial polydactyly,postaxial polydactyly
SAMD8	2.8	3.94	6.17	7.45	1.91	2.38	1.88	2.15	2.15	1.8	0,0,0:c1	probably-unrelated
USP53	1.3	1.55	2.35	2.96	14.13	12.27	13.3	13.79	14.98	12.78	0,0,0:c1	probably-unrelated
PRRC1	10.23	18.52	28.9	31.56	46.01	40.11	42.91	42.67	45.29	45.67	0,0,0:c1	no-mutants
NNT	16.21	42.51	61.22	68.14	129.3	87.23	129.37	116.83	110.96	121.27	0,0,0:c1	probably-unrelated
PRKACB	15.28	31.47	44.51	50.09	82.16	73.25	78.52	79.8	82.28	82.97	0,0,0:c1	probably-unrelated
HNRNPUL1	47.26	64.82	115.08	127.33	30.93	24.99	28.41	27.71	30.1	30	0,0,0:c1	no-mutants
LEMD3	3.89	9.01	12.43	13.65	25.99	18.22	23.6	24.19	21.97	26.72	0,0,0:c1	embryonic lethality during organogenesis, complete penetrance
TANC1	5.59	10.12	17.96	16.35	8.55	7.84	6.52	7.19	9.14	8.34	0,0,0:c1	probably-unrelated
PRR12	9.54	16.65	29.52	29.03	9.34	6.88	9.4	9.14	9.26	8.28	0,0,0:c1	no-mutants
ARFGAP3	5.67	11.85	17.43	19.59	13.33	12.08	13.01	14.62	8.91	14.21	0,0,0:c1	no-mutants
ABL2	3.4	5.91	8.84	9.63	6.33	4.54	5.36	5.07	5.91	6.13	0,0,0:c1	probably-unrelated
ARSG	0.65	0.91	1.96	1.9	1.29	1.47	1.49	1.31	1.74	0.86	0,0,0:c1	probably-unrelated
TRPM7	10.71	13.83	21	22.97	4.73	3.91	3.2	3.14	4.28	4.6	0,0,0:c1	embryonic lethality, complete penetrance,embryonic lethality between implantation and somite formation, complete penetrance
PI4KB	13.01	17.51	27.38	31.1	22.38	18.84	20.64	21.05	20.87	20.32	0,0,0:c1	no-mutants
ZBTB24	4	7.75	11.3	12.45	2.06	1.6	1.8	1.75	1.76	2	0,0,0:c1	embryonic lethality between implantation and placentation, complete penetrance
RNF216	10.48	17.41	23.73	28.9	11.93	9.53	12.64	12.21	10.1	11.65	0,0,0:c1	probably-unrelated
AKT3	6.9	13.66	18.25	21.48	7.63	8.01	7.37	6.89	7.49	6.71	0,0,0:c1	maximal tonic hindlimb extension seizures
4931406C07RIK	7.47	9.83	14.23	17.06	31.98	30.46	33.18	36.06	31.81	30.68	0,0,0:c1	no-mutants
BRD1	9	12.56	21.89	23.9	10.66	9.57	10.2	9.5	11.87	9.01	0,0,0:c1	embryonic lethality during organogenesis, incomplete penetrance
SLC12A4	6.43	9.88	12.24	16.11	9.75	8.82	9	9.68	10.08	8.66	0,0,0:c1	probably-unrelated
FAM102A	6.13	12.15	16.55	18	24.3	17.08	19.99	21.49	21.39	23.64	0,0,0:c1	no-mutants
LRCH2	8.21	11.27	16.2	19.67	3.96	3.29	3.01	3.95	3.79	3.26	0,0,0:c1	probably-unrelated
STXBP4	5.15	7.82	10.17	13.27	6.12	5.42	5.44	5.45	4.51	6.77	0,0,0:c1	no-mutants
VGLL4	19.6	41.54	63.73	67.53	23.7	25.71	28.01	25.15	26.73	21.13	0,0,0:c1	no-mutants
COL4A6	1.34	0.52	0.72	1.7	41.51	33.1	42.05	38.51	40.46	39.36	0,0,0:c1	probably-unrelated
EXTL3	13.07	28.07	35.87	41.5	17.42	11.68	15.89	15.34	14.26	17.39	0,0,0:c1	embryonic lethality, complete penetrance
HDAC6	6.33	14.59	22.62	21.55	36.24	25.27	31.86	33.16	27.89	38.55	0,0,0:c1	probably-unrelated
ACOX1	6.27	12.62	16.61	18.94	11.8	9.54	10.47	9.41	11.11	11.96	0,0,0:c1	probably-unrelated
PLGRKT	24.18	23.82	32.38	46.62	117.7	144.61	118.49	111.15	129.62	108.36	0,0,0:c1	no-mutants
TERT	1.37	2.72	3.87	4.07	3.57	2.82	2.9	2.96	3.28	3.51	0,0,0:c1	probably-unrelated
ASCC3	3.74	4.2	6	7.38	68.16	58.44	58.94	67.43	70.95	65.16	0,0,0:c1	probably-unrelated
B4GALT2	20.02	38.87	53.45	59.08	18.76	15.95	17.9	18.2	17.45	18.16	0,0,0:c1	probably-unrelated
IGHMBP2	1.55	2.25	2.86	3.63	3.84	3.23	2.95	2.84	3.32	3.94	0,0,0:c1	hindlimb paralysis
COPA	50.31	100.94	123.5	151.79	98.99	70.96	88.98	94.51	77.04	102.16	0,0,0:c1	no-mutants
SLC25A29	2.52	5.28	6.03	7.77	12.01	12.83	11.02	10.9	13.23	10.86	0,0,0:c1	no-mutants
BRD9	11.47	15.17	24.64	27.45	9.6	9.17	9.43	8.81	11.22	8.54	0,0,0:c1	no-mutants
NBEAL1	0.59	0.63	0.98	1.2	3.15	3.48	2.96	2.91	3.46	3.01	0,0,0:c1	no-mutants
TM9SF4	17.51	35.08	42.95	54	18.39	18	18.68	16.54	21.1	15.49	0,0,0:c1	probably-unrelated
RNF123	3.23	5.15	8.61	8.4	21.23	17.11	21.41	20.76	20.13	21.35	0,0,0:c1	no-mutants
D17WSU92E	23.74	39.17	54.42	61.44	28.81	26.9	28.43	24.5	24.33	24.92	0,0,0:c1	no-mutants
SRRM2	35.61	35.09	57.74	65.93	740.13	421.99	451.95	711.38	739.06	698.75	0,0,0:c1	no-mutants
VPS53	10.5	16.16	24.46	26.63	12.37	9.69	9.79	9.95	11.72	10.17	0,0,0:c1	embryonic lethality, complete penetrance
RIPK2	3.33	6.28	8.76	9.7	3.06	2.84	2.67	2.56	2.65	2.68	0,0,0:c1	probably-unrelated
RBPJ	20.22	35.89	50.36	58.37	6.45	6.98	5.74	5.35	6.45	5.19	0,0,0:c1	embryonic lethality during organogenesis, complete penetrance,embryonic lethality between somite formation and embryo turning, complete penetrance,embryonic lethality, incomplete penetrance
ATMIN	5.19	7.82	11.76	12.94	2.08	1.98	2.26	1.5	2.23	1.74	0,0,0:c1	probably-unrelated
USP54	3.58	5.3	8.5	9.1	4.14	3.84	3.85	3.17	4.4	3.36	0,0,0:c1	probably-unrelated
ADAM10	25.6	42.07	52.93	64.83	33.04	28.99	28.92	27.53	31.1	27.73	0,0,0:c1	embryonic lethality during organogenesis, complete penetrance
STAU1	26.5	41.73	58.6	66.75	88.18	74.23	83.97	76.63	77.54	76.2	0,0,0:c1	probably-unrelated
PPP1R3G	0.58	0.63	0.5	1.08	134.29	114.35	122.08	109.98	115.51	101.03	0,0,0:c1	no-mutants
PSKH1	12	29.01	39.58	42.91	5.71	5.29	6.09	5.7	4.76	5.57	0,0,0:c1	probably-unrelated
ZDHHC15	7.62	10.43	14.82	18.25	8.26	7.81	7.95	7.14	8.27	7	0,0,0:c1	probably-unrelated
PNPLA2	2.63	3.74	6.72	5.95	12.47	10.61	12.1	11.51	11.18	10.72	0,0,0:c1	probably-unrelated
GPATCH11	3.42	4.1	5.59	7.24	14.31	12.6	11.46	11.82	12.12	13.2	0,0,0:c1	no-mutants
NEK9	17.89	40.66	59.91	63.57	37.06	36.05	38.9	40.8	30.57	40.22	0,0,0:c1	probably-unrelated
GFPT1	10.68	20.53	29.53	32.97	89.04	81.41	90.75	84.22	84.54	73.92	0,0,0:c1	embryonic lethality prior to tooth bud stage
TFCP2	4.41	6.83	8.32	10.79	14.56	12.6	11.18	12.75	13.43	11.78	0,0,0:c1	probably-unrelated
RAB3GAP2	4.39	6.02	8.89	10.31	10.73	10.59	10.03	9.4	10.02	8.94	0,0,0:c1	no-mutants
GNAI1	7.65	11.62	14.06	19.14	17.17	18.21	17.4	14.62	18.38	11.95	0,0,0:c1	probably-unrelated
TPCN2	1.22	1.82	2.25	3.01	3.11	2.89	2.84	2.76	3.22	2.43	0,0,0:c1	probably-unrelated
ZKSCAN6	4.4	4.83	6.94	8.58	12.11	11.92	11.65	10.7	7.83	13.7	0,0,0:c1	no-mutants
KCTD18	2.66	5.02	6.9	7.91	9.75	8.71	9.52	8.9	8.58	8.47	0,0,0:c1	no-mutants
RANBP10	4.67	6.61	11.56	11.79	4.31	3.48	3.69	3.43	4.04	3.75	0,0,0:c1	probably-unrelated
TPRA1	5.32	9.71	11.62	14.55	21.51	18.36	21.86	21.21	18.31	19.46	0,0,0:c1	no-mutants
DNM1L	16.36	26.11	31.93	39.14	9.08	8.05	7.22	6.68	8.96	7.8	0,0,0:c1	embryonic lethality during organogenesis, complete penetrance,embryonic lethality during organogenesis, incomplete penetrance
ARMC7	2.44	2.03	3.93	4.98	9.05	10.34	9.75	8.18	9.74	6.83	0,0,0:c1	embryonic lethality prior to organogenesis
ZFP384	11.84	18.35	26.86	31.43	12.65	8.3	9.88	10.64	7.98	12.85	0,0,0:c1	probably-unrelated
SPIN1	44.58	85.88	109.29	129.96	31.83	30.64	31.29	27.97	28.88	21.81	0,0,0:c1	probably-unrelated
MAOB	0.83	3.05	4.89	4.33	9.63	8.5	10.38	11.17	8.33	4.69	0,0,0:c1	probably-unrelated
PER1	3.03	5.68	7.32	8.86	3.19	2.82	3.11	2.84	2.69	2.48	0,0,0:c1	probably-unrelated
OSBPL6	1.74	1.92	2.67	3.84	9.14	11.57	8.46	8.32	9.68	6.74	0,0,0:c1	no-mutants
KLHDC1	0.7	0.76	1.19	1.52	25.43	24.61	21.8	20.09	24.36	19.16	0,0,0:c1	no-mutants
ATAD2B	4.75	6.86	11.31	12.63	22.01	16.97	16.8	17.75	20.21	17.85	0,0,0:c1	probably-unrelated
GTPBP2	5.09	9.41	13.18	15.28	30.51	26.77	27.38	27.3	21.06	27.62	0,0,0:c1	probably-unrelated
FGFR1	19.42	46.76	72.76	70.99	6.51	5.95	5.69	6.38	4.91	4.91	0,0,0:c1	abnormal limb development,syndactyly,embryonic lethality between somite formation and embryo turning, incomplete penetrance,abnormal phalanx morphology,abnormal limb morphology,abnormal forelimb stylopod morphology,embryonic lethality between implantation and somite formation, complete penetrance,embryonic lethality prior to organogenesis,abnormal tail morphology,oligodactyly,abnormal digit morph…
PIGN	3.59	4.94	6.89	8.7	3.86	3.7	3.47	3.48	3.92	2.38	0,0,0:c1	probably-unrelated
ENDOV	4.69	5.61	8.87	10.68	2.58	2.44	2.72	2.16	1.86	1.94	0,0,0:c1	no-mutants
PRKAR2A	10.83	30.77	37.81	42.47	20.15	18.27	20	17.25	17.32	15.5	0,0,0:c1	probably-unrelated
GXYLT1	7.13	10.82	18.19	20.03	6.08	6.5	5.56	4.82	5.91	4.62	0,0,0:c1	no-mutants
TAF4	3.17	3.61	6.27	7.06	7.55	6.4	6.7	6.06	6.22	6.59	0,0,0:c1	embryonic lethality during organogenesis, complete penetrance,abnormal tail morphology
GOLGA1	2.69	2.6	3.46	4.67	9.12	6.87	7.02	7.32	9.63	7.99	0,0,0:c1	probably-unrelated
RFX1	3.26	5.08	8.36	9.11	3.09	2.62	2.42	2.36	2.65	2.68	0,0,0:c1	embryonic lethality before implantation, complete penetrance
CLASP1	10.47	15.93	26.14	28.54	11.28	10.23	9.59	8.94	10.48	9.42	0,0,0:c1	no-mutants
ATP13A2	5.15	12.28	17.3	18.95	10.82	8.2	9.62	8.82	9.76	9.65	0,0,0:c1	probably-unrelated
KIF3B	3.14	4.99	7.25	9.24	9.13	10.17	9.33	8.13	8.95	7.97	0,0,0:c1	embryonic lethality during organogenesis, complete penetrance
TBC1D20	11.49	24.2	30.63	39.55	17.11	15	16.48	13.96	14.98	15.32	0,0,0:c1	probably-unrelated
9930104L06RIK	2.23	1.34	2.59	3.66	12.09	15.19	13.03	12.99	11.13	9.55	0,0,0:c1	no-mutants
NUSAP1	25.71	37.24	68.18	73.13	48.94	49.07	50.21	44.22	53.46	38.83	0,0,0:c1	embryonic lethality at implantation, complete penetrance
RALGAPB	4.84	9.13	12.18	14.44	8.61	7.54	6.09	6.84	8.02	7.39	0,0,0:c1	probably-unrelated
HDAC8	6.71	13.8	20.33	23.17	7.95	7.55	7.36	6.23	7.14	6.64	0,0,0:c1	probably-unrelated
BASP1	100.33	125.46	178.34	223.86	247.98	204.8	245.11	247.04	205.38	145.07	0,0,0:c1	probably-unrelated
HP1BP3	26.69	43.44	66.26	76.68	585.34	563.37	577.53	544.79	537.93	430.9	0,0,0:c1	probably-unrelated
BTBD3	8.05	11.77	17.18	20.43	2.78	2.46	2.35	2.63	2.06	2.68	0,0,0:c1	no-mutants
AP1S2	7.74	8.94	12.11	17.6	43.21	54.5	47.11	40.48	47.8	30.63	0,0,0:c1	probably-unrelated
ZFP36L2	25.41	33.88	65.46	69.63	152.07	121.06	122.82	121.84	135.96	142.32	0,0,0:c1	probably-unrelated
SPATA13	1.32	2.22	3.72	4.16	2.99	3.26	2.8	2.62	3.26	2.12	0,0,0:c1	no-mutants
USP47	22.41	47.21	68.11	75.51	15.07	10.46	12.22	10.21	10.78	13.99	0,0,0:c1	probably-unrelated
EPC2	7.64	12.13	17.23	20.85	15.25	12.36	14.78	14.32	13.4	12.88	0,0,0:c1	probably-unrelated
TESK2	1.93	4.73	7.58	7.5	3.38	3.02	2.95	3.22	3.1	2.74	0,0,0:c1	no-mutants
MERTK	2.3	4.54	10.1	8.18	12.8	9.97	13.42	13.18	10.74	8.41	0,0,0:c1	probably-unrelated
MAP4K3	9.07	15.45	22.95	28.07	5.77	6.64	5.25	5.04	5.64	4.86	0,0,0:c1	probably-unrelated
DRAXIN	1.96	2.26	6.46	4.94	2	1.42	1.18	1.56	2.15	1.86	0,0,0:c1	probably-unrelated
RPS6KB1	9.31	13.27	19.67	23.95	8.35	8.11	8.23	6.8	8.12	7.06	0,0,0:c1	probably-unrelated
ATXN1L	5.24	10.14	14.46	16.72	21.72	16.41	14.85	15.92	16.44	21.42	0,0,0:c1	probably-unrelated
KCP	1.24	1.25	2.25	2.67	30.07	25.71	21.09	25.84	28.14	28.92	0,0,0:c1	probably-unrelated
ZBTB8B	0.55	0.79	1.25	1.49	8.53	7.84	8.95	8.33	7.78	6.53	0,0,0:c1	no-mutants
RAPGEF6	2.81	3.77	6.6	7.72	13.25	11.74	12.33	11.81	12.03	9.88	0,0,0:c1	probably-unrelated
ZYG11B	5.19	11.28	16.4	19.9	8.61	7.73	7.59	7.22	8.01	7.01	0,0,0:c1	no-mutants
USP31	1.8	1.68	2.54	3.74	6.72	5.52	5.79	4.94	5.1	6.09	0,0,0:c1	no-mutants
ELMO1	1.29	1.72	2.76	3.53	17.96	14.97	17.47	15.27	15.39	15.59	0,0,0:c1	probably-unrelated
RABEP1	7.86	6.18	10.53	14.87	15.76	13.68	12.01	12.72	15.1	13.65	0,0,0:c1	no-mutants
MAST2	8.93	11.76	20.35	23.62	8.78	7.29	7.51	7.43	7.52	7.46	0,0,0:c1	probably-unrelated
UGDH	34.86	50.08	71.23	91.04	39.49	35.8	40.49	33.94	34.5	30.26	0,0,0:c1	embryonic lethality between somite formation and embryo turning, complete penetrance
ZBTB21	2.42	2.56	3.89	5.48	4.29	3.84	3.93	4.24	4.04	2.64	0,0,0:c1	no-mutants
CAMSAP3	2.74	2.64	4.99	5.8	13.05	10.13	9.84	10.49	11.47	11.71	0,0,0:c1	probably-unrelated
AKNA	1.4	2.74	6.55	7.22	3.96	3.93	3.8	3.22	4.43	1.96	0,0,0:c1	probably-unrelated
H13	17.75	29.03	40.19	51.49	35.71	26.38	31.6	26.36	34.68	28.23	0,0,0:c1	abnormal tail morphology
RASA2	2.32	3.11	4.75	6.15	3.89	4.25	3.89	3.33	3.8	3.09	0,0,0:c1	no-mutants
KMT2B	5.63	6.42	12.27	13.68	6.26	4.34	4.8	6.37	4.98	5.08	0,0,0:c1	embryonic lethality, complete penetrance,embryonic lethality during organogenesis, complete penetrance,embryonic lethality, incomplete penetrance,embryonic lethality between somite formation and embryo turning, incomplete penetrance
PPIG	12.91	8.12	15.05	21.56	42.07	40.58	34.96	34.57	46.12	34.45	0,0,0:c1	no-mutants
ACVR1	6.43	10.83	16.05	20.29	3.86	3.89	3.76	3.36	3.59	3.2	0,0,0:c1	abnormal phalanx morphology,abnormal femur morphology,abnormal digit morphology,embryonic lethality during organogenesis, complete penetrance,embryonic lethality between implantation and somite formation, complete penetrance
KIF5B	20.35	21.99	37.6	44.63	23.75	19.43	19.56	20.03	24.65	21.2	0,0,0:c1	embryonic lethality during organogenesis, complete penetrance
ABL1	21.48	35.63	58.23	66.86	9.04	7.22	7.99	7.7	8.68	7.43	0,0,0:c1	embryonic lethality during organogenesis, complete penetrance
TMCC1	3.35	5.1	7.96	9.49	5.72	3.39	5.59	4.28	3.58	5.68	0,0,0:c1	no-mutants
SESN3	10.58	20.89	40.07	39	26.25	23.69	24.85	20.62	26.68	20.41	0,0,0:c1	probably-unrelated
RFX5	2.26	3.52	6.42	6.84	11.34	8.3	8.99	9.3	9.49	11.02	0,0,0:c1	probably-unrelated
ELOA	11.27	11.96	21.4	26.05	9.98	9.3	8.38	7.53	9.11	8.46	0,0,0:c1	embryonic lethality during organogenesis, complete penetrance
PHF8	4.46	8.28	14.1	14.56	37.66	24.77	31.39	30.14	28.53	36.2	0,0,0:c1	no-mutants
ACSL1	2.32	3.37	4.82	6.28	9.17	8.11	8.79	7.46	8.58	8.31	0,0,0:c1	probably-unrelated
FTO	28	56.48	77.82	95.53	14.84	15.34	14.13	13.31	13.8	10.1	0,0,0:c1	probably-unrelated
GABBR1	1.3	1.39	3	3.2	14.12	9.14	12.76	9.59	8.53	12.84	0,0,0:c1	probably-unrelated
FAM172A	7.46	15.64	20.61	25.81	12.93	12.74	12.47	9.66	11.46	9.44	0,0,0:c1	no-mutants
NID2	17.1	29.64	50.19	53.98	364.02	232.2	258.58	257.02	241.59	370.48	0,0,0:c1	probably-unrelated
PHF13	13.58	24.99	38.28	42.12	34.55	24.27	29.13	26.67	29.73	29.95	0,0,0:c1	embryonic lethality during organogenesis, incomplete penetrance
CDC42BPB	9.57	14.3	24.94	28.82	17.11	15.07	15.19	14.34	15.48	12.55	0,0,0:c1	no-mutants
STRN3	19.82	22.86	34.82	47.47	5	5.18	3.78	4.32	4.46	4.02	0,0,0:c1	probably-unrelated
CAPN7	7.65	13.49	20.26	24.14	6.8	6.7	5.44	5.9	5.71	5.29	0,0,0:c1	probably-unrelated
MICAL1	5.8	9.44	20.9	20.67	21.62	13.81	16.72	16.11	15.42	19.85	0,0,0:c1	no-mutants
DEAF1	7.35	12.53	21.77	24.84	2.5	2.03	2.04	1.86	2.1	2.14	0,0,0:c1	probably-unrelated
AGBL5	4.12	10.78	18.76	21.48	4.14	4.75	4.02	3.47	4.33	3.09	0,0,0:c1	probably-unrelated
ZFYVE1	4.35	8.93	12.94	15.13	5.15	3.86	4.06	3.92	4.07	4.75	0,0,0:c1	no-mutants
ATG2A	2.47	4.66	7.35	8.57	16.26	11.26	13.85	12.42	10.59	14.76	0,0,0:c1	no-mutants
FAM160B1	3.54	6.4	9.81	12.35	12.38	11.44	11.18	10.34	11.3	9.49	0,0,0:c1	no-mutants
SENP6	13.98	17.25	25.3	33.29	13.08	12.3	11.86	10.78	11.12	9.39	0,0,0:c1	probably-unrelated
NAB1	5.06	5.05	6.7	10.16	46.34	34.42	38.53	35.28	31.73	41.55	0,0,0:c1	probably-unrelated
PHF12	8.7	12.59	22.82	23.98	11.8	8.56	9.58	9.48	9.73	10.01	0,0,0:c1	no-mutants
NDRG1	3.09	3	3.25	6.47	3.9	4.62	3.23	3.26	4	2.45	0,0,0:c1	hindlimb paralysis
TACC1	2.51	3.3	4.96	6.61	2.04	1.6	2.06	1.07	1.36	1.98	0,0,0:c1	no-mutants
TPD52	13.49	14.19	21.82	26.05	45.23	68.3	53.48	44.94	52.97	31.61	0,0,0:c1	no-mutants
ZFP397	8.38	10.85	16.99	18.18	15.47	14.94	12.7	12.41	13.07	12.95	0,0,0:c1	no-mutants
EXOSC10	29.3	32.49	44.46	53.46	71.18	56.56	65.19	59.29	61.47	58.63	0,0,0:c1	probably-unrelated
VANGL1	3.39	5.02	6.99	7.62	17.26	14.23	15.79	13.48	16.57	12.76	0,0,0:c1	probably-unrelated
TJAP1	15.32	20.78	27.07	31.02	7.95	5.8	6.35	6.27	6.19	7.48	0,0,0:c1	no-mutants
EPRS	43.16	44.99	66.37	74.81	49.36	35.15	40.65	40.91	45.11	44.24	0,0,0:c1	embryonic lethality prior to tooth bud stage,embryonic lethality prior to organogenesis
MYD88	3.29	5.67	5.96	7.57	25.6	25.39	22.46	21.62	26.4	18.27	0,0,0:c1	probably-unrelated
SMAP1	30.83	38.94	49.19	58.07	11.03	9.82	12.46	8.69	8.13	8.37	0,0,0:c1	probably-unrelated
CYB561A3	3.89	6.5	7.61	9.23	2.02	2.39	2.02	1.95	1.91	1.49	0,0,0:c1	probably-unrelated
MKNK1	4.01	7.2	10.15	9.75	4.86	4.84	3.95	4.27	4.51	3.74	0,0,0:c1	probably-unrelated
PIGT	24.48	47.44	52.36	60.31	38.15	30.2	40.9	37.5	34.25	34.09	0,0,0:c1	probably-unrelated
SMARCAL1	6.83	10.45	13.68	15	16.01	13.56	14.04	13.61	14.02	14.02	0,0,0:c1	probably-unrelated
1700030K09RIK	4.34	5.09	5.87	7.86	4.29	4.7	4.2	3.52	4.1	3.55	0,0,0:c1	no-mutants
DHX29	12.97	16.77	23.13	25.35	36.15	26.98	29.24	29.08	30.97	34.99	0,0,0:c1	embryonic lethality between implantation and somite formation, complete penetrance
WBP4	11.55	14.29	18.64	21.85	7.46	8.04	6.07	6.26	6.69	7.56	0,0,0:c1	no-mutants
DPY19L1	14.22	22.77	24.11	30.97	27.24	24.24	25.54	23.14	25.35	19.2	0,0,0:c1	no-mutants
SPOPL	2.88	3.11	4.87	5.24	11.51	11.01	9.74	8.64	10.26	10.25	0,0,0:c1	probably-unrelated
PPP3CB	22.96	31.08	37.44	44.44	4.9	5.12	4.65	3.82	4.71	4.02	0,0,0:c1	probably-unrelated
ARHGAP9	0.95	2.01	1.81	2.27	9.11	6.34	8.9	9.59	7.54	7.3	0,0,0:c1	no-mutants
CGN	2.42	2.18	3.27	3.92	14.38	10.01	11.02	10.74	12.13	14.34	0,0,0:c1	abnormal tail morphology
SNTB2	2.96	4.02	5.12	5.8	11.03	8.42	10.73	7.66	6.33	10.04	0,0,0:c1	probably-unrelated
MPP7	2.66	2.71	5.02	5.02	4.97	5.74	4.53	4.24	4.82	4.47	0,0,0:c1	no-mutants
MTMR9	17.32	27.81	34.07	38.04	15.57	16.3	15.16	12.9	15.58	11.33	0,0,0:c1	no-mutants
PAN2	8.83	16	21.51	21.02	7.42	6.95	7.3	5.8	6.04	5.46	0,0,0:c1	embryonic lethality
TRPC4AP	45.59	75.29	90.97	102.05	19.85	19.48	17.11	15.66	18.82	15.35	0,0,0:c1	no-mutants
ETV6	7.31	13.01	15.29	16.49	20.39	14.65	19.2	17.72	14.91	17.32	0,0,0:c1	embryonic lethality during organogenesis, complete penetrance,embryonic lethality during organogenesis, incomplete penetrance
MTMR7	1.65	2.73	3.89	3.99	6.35	5.69	5.44	5.2	4.58	5.84	0,0,0:c1	no-mutants
MARK2	11.69	12.73	20	21.19	61.18	41.16	49.35	47.97	47.95	57.69	0,0,0:c1	embryonic lethality, complete penetrance
WASHC1	12.06	16.33	19.94	23.67	12.35	7.92	9.96	9.85	10.79	10.93	0,0,0:c1	embryonic lethality, complete penetrance
R3HCC1L	5.33	7.16	9.81	10.98	2.54	2.34	2.34	2.07	2.18	1.94	0,0,0:c1	probably-unrelated
SLC15A2	0.4	0.82	0.83	1.03	2.72	1.67	1.7	1.92	2.77	2.44	0,0,0:c1	probably-unrelated
RSPH9	3.14	6.17	7.17	8.49	1.42	3.18	2.38	1.72	2.33	0.69	0,0,0:c1	probably-unrelated
UBTF	41.66	49.95	64.43	76.34	106.06	88.63	93.58	88.3	83.83	88.32	0,0,0:c1	embryonic lethality before implantation, complete penetrance
ABCC4	0.79	2.02	2.11	2.5	6.03	4.46	5.13	4.78	5.27	4.86	0,0,0:c1	probably-unrelated
E2F7	5.94	9.94	13.99	13.92	3.74	3.47	3.09	2.57	3.52	2.86	0,0,0:c1	embryonic lethality during organogenesis, complete penetrance
TBC1D25	3.68	6.08	7.41	8.45	24	21.28	26.94	16.16	20.06	17.82	0,0,0:c1	no-mutants
PEX26	3.14	5.83	6.96	7.69	38.7	37.49	31.96	32.29	31.06	31.46	0,0,0:c1	probably-unrelated
COLGALT1	36.52	46.65	53.7	67.05	2.37	1.55	2.43	1.92	1.44	2.01	0,0,0:c1	embryonic lethality, complete penetrance
MLEC	85.2	124.75	122.28	153.19	3.43	1.84	2.15	3.54	3.62	2.86	0,0,0:c1	probably-unrelated
ADGRL4	1.73	2.39	2.34	3.4	3.74	2.69	3.33	3.21	1.7	3.48	0,0,0:c1	probably-unrelated
B4GALT5	9.03	13.45	16.28	20.71	6.71	6.65	5.66	5.54	6.27	4.48	0,0,0:c1	embryonic lethality during organogenesis, complete penetrance
UBE4B	21.91	36.04	49.43	53.89	38.31	27.28	33.38	36.12	24.93	32.58	0,0,0:c1	probably-unrelated
STAT4	0.35	0.45	1	0.84	1.23	1.8	1.47	1.29	1.51	0.7	0,0,0:c1	probably-unrelated
LMTK2	3.14	3.66	6	6.37	8.53	6.98	7.37	7.02	6.84	7.71	0,0,0:c1	probably-unrelated
RINT1	6.49	5.24	8.19	10.74	12.83	13.91	13.07	10.27	11.36	9.15	0,0,0:c1	embryonic lethality prior to tooth bud stage,embryonic lethality between implantation and somite formation, complete penetrance,embryonic lethality prior to organogenesis
SESTD1	3.45	5.76	8.48	8.91	55.09	49.63	48.61	45.78	50.93	43.29	0,0,0:c1	probably-unrelated
AP2B1	28.21	58.57	70.62	81.87	22.63	18.01	20.85	20.88	19.82	17.86	0,0,0:c1	probably-unrelated
MYBL1	0.67	0.65	0.87	1.11	2.9	2.38	2.14	2.51	2.42	3.2	0,0,0:c1	probably-unrelated
ZFP523	8.19	14.53	21.72	22.73	10.48	10.36	8.97	9.13	9.09	8.42	0,0,0:c1	no-mutants
ORMDL3	16.83	30.09	40.79	44.39	6.67	6.59	6.19	5.17	5.76	5.42	0,0,0:c1	no-mutants
IFT80	6.36	11.77	15.28	17.3	8.66	8.42	7.67	6.72	8.16	6.71	0,0,0:c1	abnormal pelvic girdle bone morphology,preaxial polydactyly
DYRK1A	13.43	18.55	25.72	28.94	14.69	11.85	12.47	12.25	13.26	12.35	0,0,0:c1	embryonic lethality, complete penetrance,embryonic lethality during organogenesis, incomplete penetrance
QRICH1	39	53.33	72.41	81.01	43.25	33.73	37.9	36.71	34.57	40.07	0,0,0:c1	probably-unrelated
PDXK	4.59	5.03	7.38	9.09	22.31	20.62	21.88	17.89	17.93	19.57	0,0,0:c1	probably-unrelated
CLCC1	15.32	20.29	24.08	32.04	22.46	22.24	23.98	22.47	16.4	18.08	0,0,0:c1	probably-unrelated
ABHD12	21.54	31.15	36.05	43.28	10.63	7.78	8	8.91	10.95	9.13	0,0,0:c1	probably-unrelated
TBL1XR1	6.99	10.38	13.61	15.59	13.57	12.72	11.73	10.53	14.21	9.96	0,0,0:c1	probably-unrelated
FAM53B	3.18	7.69	9.55	10.32	5.51	3.93	5.39	5.21	4.97	4.27	0,0,0:c1	probably-unrelated
STK25	33.92	45.11	62.77	73.15	30.93	25.94	27.95	25.85	26.33	27.41	0,0,0:c1	probably-unrelated
IFT122	5.19	8.36	11.23	12.76	9.2	8.86	8.81	8.9	8	7.81	0,0,0:c1	polydactyly,embryonic lethality during organogenesis, complete penetrance,preaxial polydactyly
DUSP11	12.16	15.88	20.93	26.43	113.21	120.51	120.27	104.58	94.83	101.73	0,0,0:c1	probably-unrelated
HADHA	34.76	48.77	66.17	75.03	53.55	45.02	48.61	44.82	51.07	43.95	0,0,0:c1	probably-unrelated
ACOT6	0.74	1.12	1.58	1.78	15.17	12.76	13.41	12.64	12.65	14.86	0,0,0:c1	probably-unrelated
FBXO46	4.64	8.86	11.5	12.71	30.25	18.29	24.87	23.17	17.33	30.33	0,0,0:c1	no-mutants
MGAT1	18.56	30	35.09	43.08	14.81	6.05	10.38	10.57	9.16	16.1	0,0,0:c1	embryonic lethality during organogenesis, complete penetrance
AKAP17B	1.06	1.47	1.81	2.16	3.02	2.23	2.4	2.34	2.39	2.59	0,0,0:c1	probably-unrelated
GULO	0.5	1.12	1.95	1.69	0.4	1.22	0.92	0.66	0.32	0.43	0,0,0:c1	hindlimb paralysis,abnormal femur morphology
MED23	8.99	13.66	19.13	21.46	20.1	18.85	16.78	15.94	18.46	12.53	0,0,0:c1	embryonic lethality during organogenesis, complete penetrance
ANKRD13A	17.88	28.5	37.84	42.72	9.17	8.72	7.52	7.47	7.22	6.79	0,0,0:c1	no-mutants
PBX4	0.68	1.34	2.22	1.42	43.57	45.73	42.86	34.52	29.05	29.44	0,0,0:c1	no-mutants
CNOT1	29.16	46.8	64.25	67.46	14.67	11.02	13.87	11.41	12.33	11.55	0,0,0:c1	probably-unrelated
ZFYVE27	1.82	3.01	3.28	4.18	7.63	7.8	7.35	6.28	6.28	5.78	0,0,0:c1	no-mutants
AGA	5.22	6.02	7.7	9.28	58.94	42.14	48.91	48.59	42.19	53.37	0,0,0:c1	probably-unrelated
MFAP1B	32.84	32.85	49.33	55.85	72.95	47.55	53.58	58.68	54.53	75.54	0,0,0:c1	no-mutants
ITCH	12.15	20.64	26.47	29.51	11.52	10.13	9.58	8.66	10.89	7.95	0,0,0:c1	probably-unrelated
F8A	1.84	3.34	4.18	4.74	57.95	39.24	47.56	43.91	36.88	51.05	0,0,0:c1	no-mutants
ARHGEF2	15.63	25.01	33.56	36.95	45.93	41.04	40.19	35.04	37.51	37.85	0,0,0:c1	probably-unrelated
TRIM45	3.02	4.73	5.78	6.79	6.54	3.7	4.7	5.37	5.81	5.48	0,0,0:c1	probably-unrelated
PTBP3	18.73	30.27	35.85	42.45	86.1	59.73	82.6	71.32	65.69	72.97	0,0,0:c1	no-mutants
MOCS1	4.72	6.65	8.73	10.09	4.41	3.3	3.38	3.86	3.11	4.05	0,0,0:c1	probably-unrelated
COMMD3	89.06	113.52	158.65	189.45	73.34	77.22	63.82	65.19	60.88	55.18	0,0,0:c1	no-mutants
INO80	3.05	3.02	5.54	5.8	18.14	13.65	14.01	12.92	13.54	16.35	0,0,0:c1	embryonic lethality between implantation and placentation, complete penetrance,embryonic lethality, incomplete penetrance
USP6NL	6.99	10.42	15.22	15.7	9.7	8.04	7.36	7.8	8.55	7.79	0,0,0:c1	no-mutants
BRD8	12.31	15.84	22.06	24.81	43.06	30.88	36.32	39.43	37.09	34.59	0,0,0:c1	probably-unrelated
ELL	4.53	8.24	11.85	12.46	9.84	7.91	8.81	8.23	8.57	7.14	0,0,0:c1	embryonic lethality between implantation and somite formation, complete penetrance
CCDC74A	0.6	0.52	1.03	0.96	1.36	0.94	1.2	0.88	1.23	1.2	0,0,0:c1	no-mutants
CAMKMT	4.6	7.66	10.06	11.24	12.56	12.3	11.5	9.41	11.32	8.39	0,0,0:c1	probably-unrelated
PPP6R3	26.35	41.55	55.56	58.72	13.36	12.16	11.03	10.01	13.09	10.26	0,0,0:c1	no-mutants
ASB7	3.58	7.07	10.31	10.88	4.24	5.17	4.67	4.01	4.04	2.92	0,0,0:c1	no-mutants
XRCC4	5.03	6.61	8.09	10.3	7.66	7.06	7.19	6.32	5.8	6.13	0,0,0:c1	probably-unrelated
ERLIN1	11.01	13.99	18.24	21.59	25.31	23.44	20.51	18.72	26.03	17.98	0,0,0:c1	no-mutants
ZFP72	3.18	2.87	2.96	5.31	4.67	3.3	3.99	3.57	4.2	3.78	0,0,0:c1	no-mutants
PTPN11	23.14	42.78	57.42	63.5	12.37	11.09	9.91	9.8	10.27	10.64	0,0,0:c1	embryonic lethality, complete penetrance,embryonic lethality during organogenesis, complete penetrance,embryonic lethality during organogenesis, incomplete penetrance,embryonic lethality,embryonic lethality between implantation and somite formation, complete penetrance,embryonic lethality at implantation, incomplete penetrance
ERF	25.66	39.88	51.8	58.39	43.64	26.38	32.47	33.43	24.18	40.54	0,0,0:c1	embryonic lethality during organogenesis, incomplete penetrance
NSUN3	2.63	3.43	3.61	5.43	4.19	4.91	4.62	3.87	3.76	3.48	0,0,0:c1	no-mutants
HELZ	4.1	4.92	8.11	8.53	22.83	18.82	17.21	19.49	19.69	18.76	0,0,0:c1	probably-unrelated
AREL1	5.27	10.91	13.55	15.54	5.2	4.5	4.41	3.73	5.08	3.76	0,0,0:c1	no-mutants
MNT	5.65	9.86	12.66	14.51	4.5	3.32	4.02	3.95	3.73	3.43	0,0,0:c1	probably-unrelated
OSBPL11	6.53	11.71	16.22	17.71	10.43	9.92	9.51	8.1	9.21	7.24	0,0,0:c1	no-mutants
ULK4	0.33	0.63	1.01	0.93	2.25	2.37	2.23	1.44	1.97	1.77	0,0,0:c1	probably-unrelated
MAPK7	17.32	34.25	44.03	47.79	23.4	12.98	15.36	16.82	13.73	23.89	0,0,0:c1	embryonic lethality during organogenesis, complete penetrance
LCORL	1.89	2.22	3.24	3.9	7.35	6.97	6.65	5.68	6.17	5.8	0,0,0:c1	no-mutants
DPY19L3	3.14	5.92	8.75	10.6	47.31	62	50.52	44.56	49.88	28.74	0,0,0:c1	probably-unrelated
TMEM267	4.77	8.13	6.49	10.74	7.08	6.86	6.28	5.18	6.21	5.38	0,0,0:c1	no-mutants
THRAP3	73.95	83.73	138.5	146.92	154.72	100.51	132.27	124.84	112.37	139.1	0,0,0:c1	no-mutants
PRAP1	2.05	0.26	2.44	2.73	0.84	1.23	1.37	1.02	0.63	0.46	0,0,0:c1	probably-unrelated
RUFY2	1.09	1.68	2.3	2.66	20.99	18.36	17.38	16.32	15.1	18.35	0,0,0:c1	no-mutants
PCYOX1	22.52	30.07	42.53	49.06	2.03	1.68	1.82	1.27	1.3	1.9	0,0,0:c1	probably-unrelated
KPNA6	10.14	12.39	16.36	21.21	3.08	3	2.51	2.68	2.39	2.59	0,0,0:c1	probably-unrelated
SLC52A3	0.3	0.58	1.03	0.9	11.41	9.72	10.82	10.02	7.48	8.45	0,0,0:c1	probably-unrelated
MORN1	0.62	0.8	1.69	1.2	6.93	6.34	7.69	6.26	5	5.59	0,0,0:c1	no-mutants
DMXL1	2.19	2.98	4.33	5.32	3.67	3.51	2.95	2.95	3.74	2.69	0,0,0:c1	no-mutants
XXYLT1	8.71	16.1	18.61	23.93	15.63	10.81	15.1	14.09	12.87	12.55	0,0,0:c1	probably-unrelated
SERPINE2	33.4	76.57	99.03	116.75	54.72	58.59	61.68	53.28	49.24	29.11	0,0,0:c1	probably-unrelated
CNOT4	7.36	12.44	17.53	20.19	10.34	8.79	9.19	7.6	8.7	8.14	0,0,0:c1	probably-unrelated
MAN2B1	3.91	8.14	11.29	12.5	16.91	11.1	13.12	13.41	11.86	14.58	0,0,0:c1	probably-unrelated
SLC2A8	3.33	6.78	8.08	9.71	38.93	39.43	38.33	31.16	28.89	22.82	0,0,0:c1	probably-unrelated
ATP9B	4.88	8.06	10.25	12.78	110.26	75.15	107.18	84.38	82.37	92.55	0,0,0:c1	no-mutants
PDLIM5	4.91	9.42	10.38	13.93	34.52	33.17	29.32	27.77	28.5	23.6	0,0,0:c1	probably-unrelated
IQGAP3	4.11	6.65	9.99	10.73	9.34	8.08	8.73	7.52	6.88	7.26	0,0,0:c1	no-mutants
ST3GAL4	12.19	16.58	23.41	27.87	9.17	8.68	7.77	7.03	6.89	7.3	0,0,0:c1	probably-unrelated
SLC38A9	0.6	0.98	1.27	1.67	3.98	3.61	3.2	2.95	3.78	2.87	0,0,0:c1	no-mutants
ATP11B	8.93	11.3	13.28	17.86	4.3	2.92	3.25	3.14	4.22	3.3	0,0,0:c1	no-mutants
VASN	8.57	17.43	24.95	26.95	18.44	15.73	17.39	15.48	15.44	14.09	0,0,0:c1	probably-unrelated
SP2	6.73	8.1	12.05	14.67	7.37	5.33	6.4	6.06	6.11	6.48	0,0,0:c1	embryonic lethality during organogenesis, complete penetrance
ZFP335	3.05	3.5	6.39	6.98	13.54	10.07	11.59	11.19	8.14	11.76	0,0,0:c1	embryonic lethality, complete penetrance,embryonic lethality before implantation, complete penetrance
ZBTB40	1.95	2.88	4.09	4.7	9.88	7.98	8.57	9.55	8.12	7.44	0,0,0:c1	no-mutants
EIF4E3	4.53	8	12.61	15.17	6.29	8.02	6.71	5.72	5.85	5.05	0,0,0:c1	probably-unrelated
FNIP1	3.57	4.69	6.85	8.12	3.2	2.03	2.3	2.94	3.17	2.3	0,0,0:c1	probably-unrelated
ZFP28	1.76	1.9	3.1	3.44	12.2	10.1	11.39	10.42	8.35	8.95	0,0,0:c1	no-mutants
NUB1	13.52	18.61	25.75	31.58	10.76	9.02	8.56	7.64	10.31	8.4	0,0,0:c1	no-mutants
DHX8	15.05	19.96	33.94	36.04	33.62	28.39	30.04	26.14	26.22	27.81	0,0,0:c1	no-mutants
SNX18	13.66	20.56	29.23	34.52	27.12	20.46	24.97	21.86	21.23	22.3	0,0,0:c1	no-mutants
CLCN6	2.18	3.14	5.14	5.4	10.88	8.33	8.63	8.45	9.15	9.24	0,0,0:c1	probably-unrelated
CDC25B	10.93	19.64	35.23	33.82	27.6	25.24	25.14	22.92	24.06	19.15	0,0,0:c1	probably-unrelated
GRB10	161.59	216.18	340.33	403.93	11.78	12.36	10.37	10.07	10.69	8.6	0,0,0:c1	probably-unrelated
BIN1	51.06	54.97	66.99	95.62	8.18	6.71	6.71	4.55	4.64	7.69	0,0,0:c1	probably-unrelated
TAX1BP1	32.56	35.36	58.64	68.75	72.44	64.2	58.84	58.86	61.73	53.02	0,0,0:c1	embryonic lethality during organogenesis, complete penetrance
HIF1A	30.73	45.4	63.9	76.22	57.55	46.78	47.9	44.88	50.11	43.43	0,0,0:c1	abnormal long bone morphology,short limbs,embryonic lethality during organogenesis, complete penetrance,embryonic lethality between implantation and somite formation, incomplete penetrance,embryonic lethality during organogenesis, incomplete penetrance
PSMA8	0.4	0.49	1.15	0.96	43.4	43.49	37.21	34.51	32.34	35.79	0,0,0:c1	no-mutants
GPATCH2	3.58	6.1	8.77	9.96	4.88	3.94	3.87	3.21	3.52	4.15	0,0,0:c1	no-mutants
ATG2B	2.44	3.82	5.73	6.49	9.55	7.14	7.68	6.86	7.88	6.76	0,0,0:c1	no-mutants
SMIM19	8.86	13.7	18.1	21.82	10.59	9.39	7.92	7.14	9.54	7.43	0,0,0:c1	no-mutants
CWF19L2	5.82	5.84	7.95	11.15	10.91	9.28	7.97	9.07	8.74	7.74	0,0,0:c1	no-mutants
LARP4B	9.26	11.16	16.5	19.64	13.59	11.07	10.93	9.99	11.54	10.13	0,0,0:c1	no-mutants
DDIT4	29.71	61.01	107.9	110.21	139.25	141.16	113.5	108.5	82.08	105.8	0,0,0:c1	probably-unrelated
MGEA5	23.79	42.53	56.15	67.56	17.41	15.8	14.44	12.27	15.13	11.36	0,0,0:c1	probably-unrelated
POLH	7.74	10.74	14.42	17.9	65.96	44.44	51.74	50.54	55.04	50.5	0,0,0:c1	probably-unrelated
AI429214	0.97	1.23	1.84	2.31	6.37	6.39	5.05	4.8	4.9	4.43	0,0,0:c1	no-mutants
EXOC7	13.38	18.03	30.07	33.73	45.3	38.77	38.69	35.23	35.18	30.17	0,0,0:c1	no-mutants
EIF5B	16.25	17.11	26.22	33.73	29.47	22.81	21.97	23.07	24.72	21.95	0,0,0:c1	no-mutants
WDR81	1.26	2.9	4.29	5.02	3.86	1.89	2.62	3.44	0.85	3.85	0,0,0:c1	probably-unrelated
MSL1	17.51	35.4	51.16	57.16	28.74	21.43	23.95	22.11	22.78	22.47	0,0,0:c1	no-mutants
ANKRA2	4.33	5.71	7.46	10.32	32.27	31.41	26.71	23.32	25.44	22.17	0,0,0:c1	no-mutants
MED12	4.15	5.96	11.68	11.53	15.85	11.74	11.91	10.78	14.06	11.38	0,0,0:c1	embryonic lethality, complete penetrance,embryonic lethality during organogenesis, complete penetrance,embryonic lethality during organogenesis, incomplete penetrance,embryonic lethality between implantation and somite formation, complete penetrance
GALNT11	5.76	14.03	15.59	19.95	20.48	19.86	17.21	12.95	16.99	14.24	0,0,0:c1	no-mutants
ZFP784	0.6	1.01	1.72	1.95	15.46	7.04	10.1	8.62	8.4	15.09	0,0,0:c1	no-mutants
TCN2	11.9	16.44	22.65	28.9	4.09	2.97	3.15	2.75	2.34	3.78	0,0,0:c1	no-mutants
BRD3	22.42	26.56	46.09	55.26	16.81	13.89	15.02	14.01	12.57	13.02	0,0,0:c1	no-mutants
FAXC	3.33	8.72	12.22	13.85	3.47	3.11	2.42	3	2.29	3.14	0,0,0:c1	no-mutants
CPPED1	6.66	14.47	18.39	23.46	10.46	11.25	10.04	8.84	8.67	7.44	0,0,0:c1	no-mutants
YLPM1	8.92	12.13	19.18	22.9	71.73	45.02	52.79	50.46	69.26	54.25	0,0,0:c1	no-mutants
EDA	0.97	2.21	1.86	3.21	4.62	4.52	4	2.79	3.63	2.75	0,0,0:c1	abnormal autopod morphology,abnormal tail morphology
B4GALT1	9.88	17.28	22.7	29.02	40.15	37.84	32.81	31.61	32.32	32.73	0,0,0:c1	probably-unrelated
ARHGAP5	17.48	20.91	31.71	41.61	12.79	10.72	10.53	9.56	11.71	8.66	0,0,0:c1	probably-unrelated
CCDC6	8.95	12.51	18.73	22.45	16.52	14.62	14.58	12.77	14.04	12.03	0,0,0:c1	no-mutants
ARHGAP17	7.48	10.26	16.67	18.06	31.69	22.32	27.88	26.03	25.34	27.27	0,0,0:c1	probably-unrelated
HMOX1	9.32	15.75	20.66	26.19	9.33	8.03	8.41	7.28	6.76	7.89	0,0,0:c1	probably-unrelated
LMBRD2	2.66	3.42	6.04	6.45	33.47	24.96	26	23.44	27.43	29.3	0,0,0:c1	no-mutants
ACADVL	10.07	23.64	34.06	39.13	46.11	39.11	43.48	39.81	35.86	37.41	0,0,0:c1	probably-unrelated
SETD1A	8.08	9.45	17.39	19.31	32.45	21.41	24.54	25.07	22.11	29.85	0,0,0:c1	embryonic lethality between implantation and somite formation, complete penetrance
IFT88	5.69	6.59	10.88	12.75	5.6	4.97	4.53	4.76	4.93	3.7	0,0,0:c1	polydactyly,abnormal long bone morphology,preaxial polydactyly,abnormal phalanx morphology,short limbs,embryonic lethality prior to tooth bud stage,embryonic lethality during organogenesis, complete penetrance,embryonic lethality during organogenesis, incomplete penetrance
ZC2HC1A	9.29	11.28	16.53	21.42	5.25	5.33	5.49	3.91	4.13	3.42	0,0,0:c1	no-mutants
HBEGF	2.52	2.44	2.96	4.64	7.74	8.68	6.34	6.55	7.12	5.17	0,0,0:c1	probably-unrelated
LURAP1	1.26	1.62	1.89	2.75	11.88	12.32	9.65	8.58	11.58	7.97	0,0,0:c1	no-mutants
IL11RA1	45.31	90.38	112.39	143.72	7.19	7.01	7.49	6.08	4.89	5.53	0,0,0:c1	embryonic lethality during organogenesis, complete penetrance
ELMO2	9.24	16.9	24.1	30.23	4.84	3.34	3.74	3.65	2.57	4.33	0,0,0:c1	no-mutants
SCUBE3	10.67	12.19	16.82	24.09	22.9	14.57	16.64	17.34	19.88	18.42	0,0,0:c1	fused phalanges,abnormal pectoral girdle bone morphology,abnormal digit morphology
ARSK	2.84	3.5	4.66	6.76	23.62	20.08	20.5	16.96	17.7	15.25	0,0,0:c1	probably-unrelated
CCDC125	0.53	0.92	1.18	1.64	7.41	7.84	5.29	5.56	6.88	4.32	0,0,0:c1	no-mutants
ARID2	8.92	14.14	23.27	25.96	16.57	14.34	13.43	12.96	13.62	12.23	0,0,0:c1	embryonic lethality during organogenesis, complete penetrance
STXBP1	3.68	5.66	9	10.73	4.79	3.6	4.1	3.09	2.9	3.86	0,0,0:c1	probably-unrelated
ZC3H7B	21.73	33.93	53.07	61	45.82	34.66	37.25	33.53	36.42	36.79	0,0,0:c1	no-mutants
RNF144A	12.8	31.44	46.18	53.92	11.18	9.57	10.36	8.74	8.6	6.08	0,0,0:c1	no-mutants
ANKMY2	9.83	11.54	15.94	23.1	18.91	17.33	15.28	12.73	15.18	11.85	0,0,0:c1	no-mutants
TROVE2	5.63	11.03	17.08	20.25	7.68	7.12	7.18	5.63	5.31	4.81	0,0,0:c1	probably-unrelated
SHPRH	4.11	5.29	8.75	9.99	12.48	10.73	10	9.37	10.78	8.67	0,0,0:c1	no-mutants
LMLN	0.56	0.63	1.32	1.46	3.88	3.91	3.21	2.92	2.78	3.04	0,0,0:c1	no-mutants
JRKL	2.2	3.31	4.84	6.2	16.98	16.98	13.07	13.16	12.77	11.42	0,0,0:c1	no-mutants
CLIP1	6.42	3.9	8.31	11.32	5.57	4.36	3.59	2.88	3.91	5.48	0,0,0:c1	probably-unrelated
ATG4C	3.44	6.77	9.32	11.2	9.84	9.13	7.98	7.69	8.05	7.22	0,0,0:c1	probably-unrelated
FBXO11	15.94	22.72	34.4	40.57	19.64	17.47	16.27	14.96	16.45	13.72	0,0,0:c1	probably-unrelated
AGTPBP1	2.06	2.93	4.31	5.3	12.33	10.31	11.9	9.26	8.68	7.02	0,0,0:c1	probably-unrelated
INPP5F	3.03	3.65	5.44	6.8	14.79	13.89	11.35	10.89	11.73	11.3	0,0,0:c1	probably-unrelated
VPS13C	1.19	1.23	1.89	2.5	2.3	1.37	1.39	1.9	2.01	1.91	0,0,0:c1	probably-unrelated
RAPH1	2.97	2.79	3.88	5.46	14.28	9.56	9.58	9.44	12.83	10.72	0,0,0:c1	probably-unrelated
LATS1	4.83	4.6	7.89	9.82	16.39	11.41	12.71	12.3	12.55	13.74	0,0,0:c1	probably-unrelated
MPRIP	20.42	24.88	37.91	47.28	10.31	8.4	7.4	7.69	9.15	7.69	0,0,0:c1	no-mutants
GPR161	2.46	5.9	11.01	13.75	12.24	11.57	9.6	9.58	9.4	8.66	0,0,0:c1	embryonic lethality during organogenesis, complete penetrance,abnormal limb development,hindlimb paralysis
NAGA	5.15	8.04	15.72	18.64	15.89	11.19	12.78	11.78	11.66	12.17	0,0,0:c1	probably-unrelated
ZFP148	6.66	10.36	16.88	22.43	16.48	13.86	11.34	14.24	13.24	11.16	0,0,0:c1	embryonic lethality during organogenesis, complete penetrance
RGMA	6.04	16.75	29.75	35.72	6.87	3.66	5.91	4.78	4.49	5.46	0,0,0:c1	probably-unrelated
KCNIP1	0.23	0.35	0.69	2.67	0.74	2.24	1.58	0.54	0.27	0.24	0,0,0:c1	probably-unrelated
PARP4	0.41	0.44	0.83	1.31	2.85	3.28	2.01	2.19	2.25	2.15	0,0,0:c1	probably-unrelated
DNAL1	1.35	3.11	4.73	6.75	2.43	2.5	1.86	1.45	2.02	1.61	0,0,0:c1	probably-unrelated
ZFP251	7.71	16.45	22.29	30.04	2.02	1.23	2.01	1.71	1.1	1.24	0,0,0:c1	no-mutants
PXDN	31.75	53.27	89.61	113.08	47.16	30.89	40.53	37.63	34.71	31.89	0,0,0:c1	probably-unrelated
B3GNT8	0.49	0.95	1.48	2.01	20.41	16.26	17.67	16.07	14.92	13.15	0,0,0:c1	no-mutants
USF3	1.68	1.91	4.05	5.21	13.63	9.59	9.99	10.04	10.9	9.97	0,0,0:c1	probably-unrelated
2900011O08RIK	1.46	2.03	5.8	7.84	1.57	2.06	1.32	1.32	1.23	1.12	0,0,0:c1	no-mutants
ARNT	11.44	20	32.19	42.78	37.35	21.42	27.58	25.81	24.21	29.55	0,0,0:c1	embryonic lethality, complete penetrance,embryonic lethality during organogenesis, complete penetrance,embryonic lethality between somite formation and embryo turning, incomplete penetrance
GLI3	11.86	15.93	19.65	31.98	26.7	16.86	19.73	18.54	24.79	16.54	0,0,0:c1	adactyly,abnormal limb development,syndactyly,abnormal phalanx morphology,abnormal limb morphology,abnormal forelimb stylopod morphology,preaxial polydactyly,oligodactyly,brachydactyly,abnormal digit morphology,abnormal autopod morphology,embryonic lethality before implantation, complete penetrance,embryonic lethality during organogenesis, incomplete penetrance,abnormal long bone morphology,abnor…
YEATS2	8.85	12.94	22.26	27.88	46.33	33.84	34.88	35.93	29.05	34.56	0,0,0:c1	no-mutants
SGSM2	1.37	2.47	3.48	5	1.8	1.22	1.19	1.16	1.63	1.35	0,0,0:c1	no-mutants
SATB1	3.24	3.45	6.91	9.24	4.89	3.72	3.46	3.39	4.54	3.01	0,0,0:c1	oligodactyly
GTF2IRD2	1.84	2.8	5.29	6.87	7.48	7.23	5.1	4.41	6.59	5.1	0,0,0:c1	no-mutants
B3GNT3	0.36	0.78	0.79	1.22	11.05	6.33	9.43	9.21	7.06	8.22	0,0,0:c1	probably-unrelated
TNKS	5.22	9.8	17.5	21.16	2.75	2.24	1.76	2.26	3.05	1.74	0,0,0:c1	embryonic lethality during organogenesis, complete penetrance
TSKU	9.4	16.82	22.81	34.77	23.45	22.97	18.8	15.43	14.86	15.54	0,0,0:c1	probably-unrelated
CCDC157	0.97	1.46	2.3	3.03	4.35	4.16	3.81	4.02	2.02	2.7	0,0,0:c1	no-mutants
CUEDC1	5.51	7.79	12.7	19.81	19.16	14.44	16.09	13.79	15.38	12	0,0,0:c1	no-mutants
IRS2	3.15	5.41	15.11	17.33	11.77	9.3	9.55	8.55	8.81	8.48	0,0,0:c1	probably-unrelated
IGF2R	15.4	18.26	31.31	47.78	8.67	5.35	7.04	6.56	7.45	6.24	0,0,0:c1	polydactyly,abnormal tail morphology
ASXL3	1.12	2.02	3.98	5.72	4.69	4.49	4.48	3.64	3.1	1.96	0,0,0:c1	no-mutants
CHST1	1.43	2.1	2.81	4.85	22.88	16.36	19.53	15.55	16.17	17.69	0,0,0:c1	probably-unrelated
PPP3CC	1.25	2.13	2.92	4.52	12.73	9.6	9.21	8.85	9.51	10.12	0,0,0:c1	probably-unrelated
MYH10	30.76	42.61	83.87	111.18	75.89	47.85	50.93	59.83	53.23	62.94	0,0,0:c1	embryonic lethality, complete penetrance
PIAS3	4.67	9.39	18.63	22.53	14.95	12.34	11.27	11.44	10.41	11.92	0,0,0:c1	probably-unrelated
VCAM1	4.42	25.85	46.43	63.91	2.05	2.04	1.66	2.75	1.58	1.79	0,0,0:c1	embryonic lethality during organogenesis, complete penetrance
SDC3	6.21	20.53	42.9	54.09	111.89	71.07	97.12	86.56	102.01	61.79	0,0,0:c1	probably-unrelated
2700081O15RIK	7.64	17.43	35.57	42.44	12.2	8.55	10.33	7.51	8.83	9.89	0,0,0:c1	no-mutants
MED13	4.19	6.61	12.53	16.88	48.84	30.86	33.88	34.52	36.96	42.36	0,0,0:c1	probably-unrelated
PLAC9B	0.35	0.08	0.31	5.77	0	6.69	5.22	4.99	0	0	0,0,0:c1	no-mutants
CEP85L	1.77	2.2	3.57	5.54	3.71	3.63	3.15	3.1	2.8	2.39	0,0,0:c1	no-mutants
NFAT5	1.69	1.29	3.46	4.96	4.05	4.06	3.13	2.89	3.44	2.69	0,0,0:c1	probably-unrelated
AFAP1L1	4.53	6.2	9.7	16.46	6.75	6.76	6.2	5.55	4.14	3.72	0,0,0:c1	no-mutants
KLF9	0.17	0.45	1.41	1.39	3.09	2.58	2.83	2.6	2.32	2.21	0,0,0:c1	probably-unrelated
ATF7IP	8.5	16.97	31.72	37.51	41.29	28.38	32.14	30.17	33.19	35.32	0,0,0:c1	no-mutants
ANKRD50	4.13	7.94	13.13	16.73	15.08	13.23	10.76	9.45	11.55	12.74	0,0,0:c1	no-mutants
CDK5RAP2	3.49	4.81	9.67	11.45	20.75	17.34	12.37	17.93	12.89	18.5	0,0,0:c1	probably-unrelated
MPDZ	7.78	10.17	17.74	23.24	35.98	26.2	27.08	26.67	29.84	28.94	0,0,0:c1	probably-unrelated
GIT2	3.96	6.97	12.79	16.49	17.62	13.3	13.62	13.48	16.43	11.64	0,0,0:c1	probably-unrelated
ZFP182	0.65	0.89	1.12	1.88	5.61	4.45	4.43	4.08	4.5	4.29	0,0,0:c1	probably-unrelated
HIVEP1	2.78	1.94	5.09	6.79	4.16	3.12	3.09	3.35	3.66	2.94	0,0,0:c1	no-mutants
PCP4	2.43	0.6	2.09	6.47	0.23	1.38	0.25	0.54	0.35	0.24	0,0,0:c1	probably-unrelated
MAGED2	93.04	168.93	266.35	372.53	126.83	65.38	91.9	83.5	87.12	110.64	0,0,0:c1	no-mutants
NF1	2.33	3.46	6.74	8.74	8.72	7.52	6.04	5.32	8.27	6.37	0,0,0:c1	short limbs,embryonic lethality during organogenesis, complete penetrance
CEP164	5.28	5.97	11.69	14.53	13.78	10.47	9.43	10.8	11.56	10.29	0,0,0:c1	embryonic lethality prior to tooth bud stage
KDM4A	16.1	33.33	62.45	69.05	51.83	39.39	44.15	41.56	42.57	38.45	0,0,0:c1	probably-unrelated
ELMO3	0.8	0.96	1.23	1.97	5.21	3.75	3.75	3.74	3.83	4.47	0,0,0:c1	probably-unrelated
SYNE2	1.62	2.86	5.46	6.26	300.68	206.32	210.58	207.21	220.08	272.33	0,0,0:c1	probably-unrelated
MAP4K4	29.47	44.62	79.7	94.81	14.72	11.38	10.64	11.09	14.62	9.7	0,0,0:c1	embryonic lethality during organogenesis, complete penetrance,sirenomelia
CD109	1.66	3.83	6.87	8.03	8.01	5.9	4.02	5.98	7.85	6.39	0,0,0:c1	probably-unrelated
SENP7	4.9	8.22	13.14	17.49	8.8	8.85	7.81	6.96	7.43	5.66	0,0,0:c1	probably-unrelated
ZFP319	3.65	8.35	14.29	16.38	22.86	17.59	17.2	16.23	15.78	19.41	0,0,0:c1	no-mutants
MAST3	1.81	3.53	5.47	6.66	7.17	5.31	4.88	4.99	6.03	5.82	0,0,0:c1	no-mutants
RRAGD	3.79	8.62	18.18	20.92	0.98	1.35	0.97	1.12	0.54	0.84	0,0,0:c1	no-mutants
TTC21B	3.91	6.17	9.75	12.27	6.88	6.56	5.9	5.25	6.12	4.33	0,0,0:c1	polydactyly,abnormal limb bone morphology
CPM	1.98	7.06	10.64	12.64	3.9	3.54	3.97	3.11	3.17	2.33	0,0,0:c1	no-mutants
ZFP644	8.01	9.78	15.31	20.37	15.39	13.16	12.51	11.8	13.82	10.1	0,0,0:c1	no-mutants
PAFAH2	3.19	7.27	9.11	11.83	8.1	8.37	7.58	6.5	6.92	4.73	0,0,0:c1	probably-unrelated
QK	33.2	59.41	87.29	108.46	87.02	77.09	75.84	69.17	66.08	71.54	0,0,0:c1	embryonic lethality between implantation and placentation, complete penetrance,embryonic lethality during organogenesis, complete penetrance,embryonic lethality between somite formation and embryo turning, complete penetrance,embryonic lethality, complete penetrance
PKP4	9.13	9.44	17.39	22.72	15.88	14.93	14.45	11.44	11.97	9.96	0,0,0:c1	probably-unrelated
ZFYVE9	7.95	13.62	19.2	24.39	7.49	6.48	5.94	5.39	6.14	6.13	0,0,0:c1	no-mutants
IFNAR1	9.79	14.22	21.49	28.64	3.39	3.66	2.83	2.41	3.48	2.17	0,0,0:c1	probably-unrelated
RAB11FIP4	1.9	4.53	8.97	9.17	7.11	4.89	5.11	5.79	4.65	6.38	0,0,0:c1	no-mutants
SLU7	10.19	17.81	26.12	30.94	23.57	17.87	18.73	18.44	18.67	19.93	0,0,0:c1	probably-unrelated
CHSY1	17.88	25.88	39.75	49.44	15.06	9.74	11.73	10.73	12.8	12.83	0,0,0:c1	short limbs,abnormal phalanx morphology,abnormal limb bone morphology
MGA	5.31	5.14	8.87	12.07	12.02	9.16	8.88	8.55	10.52	9.38	0,0,0:c1	embryonic lethality between implantation and somite formation, complete penetrance
GKAP1	11.55	10.94	16.93	25.5	12.57	11	8.8	9.22	11.21	8.95	0,0,0:c1	no-mutants
NRROS	1.84	3.65	4	5.93	1.04	0.92	1.11	1.09	0.64	0.54	0,0,0:c1	probably-unrelated
ARNT2	4.23	10.99	21.43	23.74	4.26	4.21	3.59	3.39	3.28	3.26	0,0,0:c1	probably-unrelated
RPS6KC1	3.77	6.73	9.19	11.87	9.82	7.16	7.51	7.45	7.59	8.02	0,0,0:c1	no-mutants
SUPT6	15.18	19.32	35.38	41.83	18.87	15.48	14.88	15.34	15.79	13.62	0,0,0:c1	embryonic lethality before implantation, complete penetrance
EVC2	4.73	6.73	9.95	13.01	32.13	21.99	22.47	24.19	26.97	24.95	0,0,0:c1	short limbs
PKNOX1	5.04	10.58	13.99	19.66	7.41	6.59	6.23	5.53	5.95	5.22	0,0,0:c1	embryonic lethality, complete penetrance,embryonic lethality between implantation and somite formation, complete penetrance
SUCO	5.97	8.09	13.97	18.13	3.96	3.67	2.95	2.52	3.84	2.19	0,0,0:c1	abnormal long bone morphology
MLLT1	20.99	46.51	73.27	83.51	16.76	12.48	12.29	11.83	13	12.91	0,0,0:c1	embryonic lethality, complete penetrance
CRTC1	3.24	7.36	13.61	15.04	6.61	6.09	4.9	4.63	5.32	4.72	0,0,0:c1	probably-unrelated
EPG5	0.9	1.88	3.09	3.66	7.91	8.41	5.74	5.68	7.56	5.11	0,0,0:c1	hindlimb paralysis
SGPP1	5.17	6.1	10.1	13.99	7.67	6.37	6.68	5.85	5.96	6.37	0,0,0:c1	probably-unrelated
TGFBRAP1	2.15	4.65	6.76	8.96	5.54	4.33	4.75	3.89	4.58	4.77	0,0,0:c1	no-mutants
WNT3	3.28	5.4	6.58	10.83	11.71	10.92	10.1	8.92	10.29	8.01	0,0,0:c1	absent hindlimb,abnormal forelimb morphology,embryonic lethality during organogenesis,embryonic lethality during organogenesis, complete penetrance,abnormal autopod morphology,absent limbs,abnormal hindlimb morphology
PLAG1	1.72	2.58	4.84	6.02	11.14	9.64	9.18	10.04	8.58	9.03	0,0,0:c1	probably-unrelated
DENND4C	2.49	3.65	6.6	7.81	13.37	12.45	11.13	11.49	11.82	10.39	0,0,0:c1	probably-unrelated
ULBP1	0.17	0.64	0.79	1.03	4.1	2.92	2.81	3.79	4.02	2.81	0,0,0:c1	no-mutants
SETD5	18.19	19.74	37.98	49.5	12.89	10.28	10.86	9.17	9.96	10.58	0,0,0:c1	probably-unrelated
ZFP619	0.39	0.71	1	1.46	68.95	49.07	61.42	58.77	44.2	59.36	0,0,0:c1	no-mutants
PLXND1	8.05	14.31	24.06	31.29	9.82	7.66	8.24	7.74	6.55	8.88	0,0,0:c1	probably-unrelated
E130311K13RIK	1.59	1.49	1.81	3.73	6.49	6.69	5.07	4.4	5.41	5.13	0,0,0:c1	no-mutants
SKIDA1	6.47	7.46	13.92	18.77	9.72	6.18	8.75	7.99	9.12	6.09	0,0,0:c1	probably-unrelated
PTPRJ	1.3	1.18	2.37	3.48	8.41	7.13	6.22	6.95	8.57	6.18	0,0,0:c1	embryonic lethality during organogenesis, complete penetrance,embryonic lethality during organogenesis, incomplete penetrance
FOXRED2	1.36	2.67	3.77	5.54	6.76	4.77	5.65	5.84	4.33	6.04	0,0,0:c1	no-mutants
D830031N03RIK	1.96	1.37	3.61	4.71	7.21	6.25	6.73	5.73	5.62	5.19	0,0,0:c1	no-mutants
FZD5	0.45	0.44	1.26	1.48	2	1.44	1.61	1.51	2.19	1.48	0,0,0:c1	probably-unrelated
PLEKHM3	0.75	1.28	2.04	2.5	3.32	2.76	2.14	2.56	3.31	2.87	0,0,0:c1	no-mutants
KREMEN1	7.72	6.04	11.92	18.58	4.22	4.16	3.46	2.88	4.74	2.78	0,0,0:c1	polydactyly
OS9	11.46	16.3	25.82	32.66	26.79	20.41	21.35	22.06	21.16	24.06	0,0,0:c1	probably-unrelated
SMOX	8.48	22.96	51.86	43.05	5.5	4.34	3.91	3.99	4.48	4.53	0,0,0:c1	probably-unrelated
DDX6	47.92	55.01	98.1	124.29	108.02	86.44	100.08	83.94	89.34	91.26	0,0,0:c1	no-mutants
TOR3A	1.17	2.4	4.43	5.42	2.43	1.76	2.44	2.38	2.05	1.28	0,0,0:c1	no-mutants
UBE2E2	13.63	17.45	26.58	37.36	169.61	154.33	158.42	147.73	146.42	111.23	0,0,0:c1	probably-unrelated
KCTD6	4.53	6.66	12.9	15.01	21	20.27	22	19.97	18.89	13.93	0,0,0:c1	no-mutants
NSRP1	5.85	6.17	10.87	13.86	16.19	13.57	11.5	13.23	14.57	13.95	0,0,0:c1	embryonic lethality, complete penetrance
MGAT5	2.09	2.81	5.04	6.69	18.25	19.98	16.54	14.71	19.36	13.43	0,0,0:c1	probably-unrelated
YOD1	0.89	0.62	1.3	1.86	4.42	4.35	4.26	3.44	3.62	2.7	0,0,0:c1	no-mutants
ZFP114	1.01	1	1.58	2.29	51.61	44.06	46.67	42.57	40.42	36.32	0,0,0:c1	no-mutants
GPRIN2	0.02	0.74	1.17	1.44	1.66	1.46	1.58	1.19	1.49	1.03	0,0,0:c1	no-mutants
WDR7	2.16	4.29	6.38	7.81	8.61	5.82	6.57	6.62	7.09	7.23	0,0,0:c1	no-mutants
TUBB1	1.13	2.27	5.27	4.87	6.56	6.37	4.89	5.09	6.04	5.16	0,0,0:c1	probably-unrelated
ZFP62	8.56	9.9	16.04	20.51	82.5	68.17	77.92	72.17	64.87	65.39	0,0,0:c1	no-mutants
TTC30B	1.52	3.79	7.32	7.97	9.87	9.23	8.07	7.84	10.42	6.95	0,0,0:c1	no-mutants
KANSL1	8.44	12.99	21.72	27.09	6.32	5.49	5.51	4.98	5.24	4.77	0,0,0:c1	no-mutants
ABTB2	1.68	4.8	6.88	8.68	11.17	9.73	11.03	10.5	7.91	7.57	0,0,0:c1	probably-unrelated
ANKIB1	2.35	4.07	7.64	10.66	8.96	5.52	7.39	5.47	6.38	5.21	0,0,0:c1	probably-unrelated
SHROOM2	2.1	3.68	6.39	8.91	15.89	10.94	10.46	12.04	9.88	10.63	0,0,0:c1	no-mutants
ZNFX1	1.08	1.31	2.98	3.94	11.09	9.27	7.64	6.95	7.62	7.58	0,0,0:c1	no-mutants
CHD6	2.92	2.73	7.11	9.21	15.08	10.22	10.35	10.83	11.14	9.4	0,0,0:c1	probably-unrelated
IGLON5	1.27	6.04	18.88	21.79	7.98	4.03	5.75	5.65	3.89	6.55	0,0,0:c1	no-mutants
NCOA6	5.38	6.27	13.85	17.03	9.76	7.03	6.52	6.78	7.04	6.76	0,0,0:c1	embryonic lethality, complete penetrance,oligodactyly,abnormal digit morphology,embryonic lethality during organogenesis, complete penetrance,embryonic lethality during organogenesis, incomplete penetrance
XRN1	2.25	3.39	6.85	8.51	16.93	11.7	10.4	11.38	13.21	11.37	0,0,0:c1	no-mutants
ARSA	2.11	4.59	6.49	9.26	5.19	3.56	2.86	3.24	3.95	4.15	0,0,0:c1	probably-unrelated
CCDC93	2.35	3.73	6.53	8.83	21.8	17.16	14.42	14.7	15.13	14	0,0,0:c1	no-mutants
LIMK1	7.41	14.85	24.84	33.76	5.77	4.33	4.3	4.52	3.83	3.03	0,0,0:c1	probably-unrelated
SOX5	0.76	2.38	6.78	8.07	6.04	3.26	3.52	2.78	3.14	6.23	0,0,0:c1	abnormal fibula morphology,abnormal tibia morphology,short limbs,abnormal radius morphology,abnormal limb morphology,abnormal ulna morphology,abnormal autopod morphology
INSC	0.04	0.49	1.26	1.45	1.09	0.99	0.44	0.55	1.21	0.15	0,0,0:c1	probably-unrelated
MYO9B	4.4	4.19	9.85	12.44	36.47	21.27	23.75	25.85	25.02	29.72	0,0,0:c1	probably-unrelated
MMRN1	1.87	3.27	5.5	8.22	1.98	1.88	1.25	1.54	0.95	1.23	0,0,0:c1	probably-unrelated
BPTF	4.99	4	10.49	14.54	21.34	15.38	14.84	14.58	17.9	12.12	0,0,0:c1	embryonic lethality during organogenesis, complete penetrance,embryonic lethality between implantation and somite formation, complete penetrance
NPHP3	0.69	1.21	2.39	2.97	25.88	20.08	18.15	18.06	19.43	17.07	0,0,0:c1	probably-unrelated
ARID4A	1.62	1.76	4.45	5.52	11.72	9.03	8.43	6.76	9.06	8.2	0,0,0:c1	probably-unrelated
CYBB	0.02	0.26	0.92	1.17	1.8	2.51	1.6	1.28	1.3	1.26	0,0,0:c1	probably-unrelated
GBF1	7.06	12.32	21.27	28.75	6.39	4.74	4.57	5.31	4.33	4.47	0,0,0:c1	probably-unrelated
HERC2	2.2	3.7	6.42	8.03	10.55	7.48	6.14	8.37	8.22	7.66	0,0,0:c1	probably-unrelated
PDE8A	0.68	4.32	3.77	6.3	9.21	7.18	7.26	6.02	6.23	6.52	0,0,0:c1	probably-unrelated
KIF3A	3.85	7.34	12.45	15.84	6.78	6.08	4.7	4.86	5.13	4.22	0,0,0:c1	polydactyly,embryonic lethality during organogenesis, complete penetrance,abnormal limb development,short limbs
IGF1R	4.28	7.75	17.88	19.66	26.71	19.49	21.97	20.99	19.2	15.02	0,0,0:c1	probably-unrelated
ARID4B	4.64	3.97	9.64	12.22	10.6	8.84	6.99	7.4	8.15	7.2	0,0,0:c1	embryonic lethality, complete penetrance
MARF1	5.09	6.19	10.87	14.64	23.24	17.7	15.88	14.63	21.16	11.95	0,0,0:c1	probably-unrelated
DKK3	1.38	1.88	5.65	9.58	31.98	49.65	38.25	20.46	14.74	17.56	0,0,0:c1	probably-unrelated
ICE1	6.69	6.95	12.81	17.78	16.52	13.64	12.44	12.43	12.86	8.55	0,0,0:c1	no-mutants
DNAJC28	0.76	1.5	2.71	3.21	1.73	1.29	1.24	1.27	1.25	1.07	0,0,0:c1	probably-unrelated
ZMYM3	7.68	15.27	29.01	34.57	24.74	18.86	17.61	17.37	18.83	15.7	0,0,0:c1	no-mutants
NSD1	9.28	10.86	20.34	26.91	6.32	5	4.08	4.2	5.34	3.35	0,0,0:c1	embryonic lethality during organogenesis, complete penetrance
IFT172	3.08	7.84	11.88	14.94	15.65	10.47	9.65	10.15	12.28	10.54	0,0,0:c1	polydactyly,preaxial polydactyly,short limbs,abnormal limb morphology,embryonic lethality during organogenesis, complete penetrance
EMSY	5.03	4.69	11.88	13.92	21.72	14.56	16.56	15.01	13.65	15.37	0,0,0:c1	no-mutants
CEP162	1.44	1.17	2.34	3.16	1.88	1.03	1.16	1.42	1.4	1.23	0,0,0:c1	no-mutants
ATRX	7.79	7.22	16.06	22.2	26.68	18.93	17.62	16.23	22.19	14.09	0,0,0:c1	embryonic lethality during organogenesis, complete penetrance,embryonic lethality during organogenesis, incomplete penetrance
S1PR3	12.76	51.02	77.56	104.2	35.15	24.67	23.22	22.33	26.72	21.14	0,0,0:c1	probably-unrelated
ZMIZ1	13.4	20.32	49.36	54.3	5.01	2.95	4.02	3.56	1.97	3.64	0,0,0:c1	embryonic lethality during organogenesis, complete penetrance
PLCH2	0.44	0.39	0.63	1.18	3.33	2.46	1.78	1.98	2.31	2	0,0,0:c1	probably-unrelated
ZZEF1	1.05	1.29	2.41	3.39	15.93	9.48	10.05	10.5	11.06	10.03	0,0,0:c1	probably-unrelated
TMEM158	3.87	4.35	7.36	12.36	5.2	4.11	3.78	3.33	3.46	2.92	0,0,0:c1	no-mutants
KLHL3	0.18	0.27	0.91	1.28	6.34	5.02	4.23	3.17	4.52	2.34	0,0,0:c1	probably-unrelated
ENC1	5.36	10.37	20.09	27.35	36.28	24.44	25.8	23.26	26.08	18.43	0,0,0:c1	probably-unrelated
GOLGA3	4.37	4.01	9.32	13.54	12.24	7.95	6.72	7.57	8.47	8.69	0,0,0:c1	probably-unrelated
MBD5	1.14	1.57	3.21	4.49	6.83	4.54	4.46	4.9	5.35	3.7	0,0,0:c1	probably-unrelated
CEP170	5.07	7.25	16.28	21.6	6.66	4.94	4.08	3.81	3.07	5.35	0,0,0:c1	no-mutants
KMT2C	1.03	1.13	2.49	3.56	17.92	14.47	10.97	12.74	13.78	10.09	0,0,0:c1	embryonic lethality, incomplete penetrance
GOLGB1	2.86	1.51	3.76	6.33	16.78	10.12	10.05	11.63	12.83	10.51	0,0,0:c1	probably-unrelated
RIN3	1.07	2.22	3.77	7.19	1.58	1.06	0.87	0.59	1.43	0.47	0,0,0:c1	probably-unrelated
PODXL2	2.71	9.7	24.92	41.23	1.96	1.78	2.29	1.14	0.74	0.81	0,0,0:c1	no-mutants
GCC2	2.4	1.97	4.29	5.98	121.38	70.37	82.68	85.6	82.19	82.56	0,0,0:c1	no-mutants
TSHZ3	2.06	2.35	4.6	6.43	18.12	13.72	13.24	12.5	12.53	10.41	0,0,0:c1	probably-unrelated
TMEM132C	14.75	24.79	44.43	57.38	17.65	10.52	13.23	13.56	12.14	10.77	0,0,0:c1	no-mutants
CCDC66	4.14	3.69	7.13	11.14	15.57	12.26	11.51	9.94	11.97	9.09	0,0,0:c1	probably-unrelated
CC2D2A	2.01	2.21	3.2	4.8	4.26	3.05	2.78	2.98	3.18	2.27	0,0,0:c1	polydactyly,preaxial polydactyly
PPP1R12A	7.85	9.21	16.38	21.02	23.67	16	16.05	16.1	15.77	16.21	0,0,0:c1	embryonic lethality between implantation and somite formation, complete penetrance
ARL6IP5	34.76	41.64	61.19	104.77	2.65	2.1	1.03	0.96	2.57	0.88	0,0,0:c1	probably-unrelated
CACHD1	11.34	17.23	33.92	39.3	21.44	12.84	13.55	14.81	15.1	14.45	0,0,0:c1	no-mutants
EP300	5.56	7.69	15.04	17.86	22.5	13.01	13.99	15.47	15.09	16.11	0,0,0:c1	embryonic lethality during organogenesis, complete penetrance,embryonic lethality during organogenesis, incomplete penetrance
CDH6	2.44	3.17	5.6	9.59	2.11	2.33	2.24	0.9	0.88	0.97	0,0,0:c1	probably-unrelated
SPEN	2.95	3.04	7.73	8.72	14.23	8.22	8.29	9.33	11.28	9.54	0,0,0:c1	probably-unrelated
WRN	2.01	3.21	5.08	6.68	24.94	17.18	15.89	16.38	17.9	16.94	0,0,0:c1	probably-unrelated
MYPOP	2.88	6.87	9.55	13.54	2.65	1.83	1.86	1.63	1.77	1.81	0,0,0:c1	no-mutants
ARFGEF1	7.65	8.68	15.24	20.39	18.83	13.99	12.55	12.16	14.71	11.68	0,0,0:c1	probably-unrelated
UNC5C	3.91	8.28	19.02	23.22	18.94	10.4	8.87	10.48	7.72	15.86	0,0,0:c1	probably-unrelated
CELF4	0.67	0.69	1.02	1.82	1.85	1.56	1.25	1.12	1.45	0.26	0,0,0:c1	probably-unrelated
FBF1	4.09	4.18	8.85	12.11	4.03	3.3	2.78	2.57	2.43	2.32	0,0,0:c1	polydactyly,abnormal humerus morphology
BOD1L	2.04	1.26	2.8	4.6	9.67	8.26	6.69	6.26	6.45	5.02	0,0,0:c1	no-mutants
MAPK8IP3	2.97	2.96	7.55	9.12	20.43	12.77	14.7	11.86	13.08	15.2	0,0,0:c1	probably-unrelated
TXNDC16	2.64	6.4	10.91	14.11	17.03	11.15	10.42	10.3	11.78	11.72	0,0,0:c1	no-mutants
MTMR11	1.59	6.22	11.4	14.28	18.05	11.64	13.5	12.17	10.09	11.19	0,0,0:c1	no-mutants
SLC12A6	1.38	3.45	5.19	7.5	49.7	19.76	24.74	31.04	28.79	40.81	0,0,0:c1	probably-unrelated
MFSD6	0.29	0.44	0.98	1.42	9.13	9.41	4.16	5.48	5.12	4.5	0,0,0:c1	no-mutants
DDC	4.09	4.54	4.77	9.72	16	12.54	11.14	9.76	10.59	9.59	0,0,0:c1	embryonic lethality, complete penetrance
BCAR3	1.9	1.77	2.74	4.25	7.73	5.15	5.3	5.56	7.25	5.31	0,0,0:c1	probably-unrelated
KDM6B	10.22	14.72	30.27	32.15	11.3	9.07	8.29	9.08	8.69	7.44	0,0,0:c1	short limbs,abnormal appendicular skeleton morphology
ERCC5	3.77	4.29	7.64	9.94	5.04	4.72	3.15	3.56	3.65	3.61	0,0,0:c1	probably-unrelated
FIBIN	4.96	38.88	43.29	62.7	23.49	21.8	14.97	16.03	11.69	17.98	0,0,0:c1	no-mutants
WNK1	11.87	18.05	29.13	37.4	10.31	8.43	7.12	8.07	6	7.33	0,0,0:c1	embryonic lethality during organogenesis, complete penetrance
TRIM46	0.37	0.95	2.2	2.07	8	4.59	5.55	5.61	5.37	6.31	0,0,0:c1	no-mutants
MAML3	1.99	1.5	3.52	4.42	9.68	6.94	8.14	7.55	6.91	6.51	0,0,0:c1	probably-unrelated
DAPK1	5.56	10.45	12.8	19.83	7.99	7.33	6.91	5.52	5.18	5.34	0,0,0:c1	probably-unrelated
EPS15	7.13	9.62	13.73	18.92	29.65	25.33	22.05	20.4	21.86	20.88	0,0,0:c1	probably-unrelated
ZFYVE26	1.46	2.49	4.22	4.98	3.44	2.65	2.77	2.72	2.75	2.13	0,0,0:c1	probably-unrelated
OTUD7B	5.25	8.52	13.13	16.33	16.41	10.68	12.58	11.4	11.31	13.33	0,0,0:c1	probably-unrelated
RFC1	14.97	13.59	27.8	33.6	23.65	17.81	17.21	17.53	18.15	17.07	0,0,0:c1	embryonic lethality prior to organogenesis
ACADSB	11.48	14.57	22.72	29.82	25.02	21.3	19.87	17.89	19.15	18.55	0,0,0:c1	no-mutants
BDP1	2.12	1.19	2.77	4.02	2.66	2.32	1.74	1.99	2.36	1.69	0,0,0:c1	no-mutants
PIK3CA	4.07	7.28	11.84	14.55	2.09	1.73	1.43	2.1	1.1	1.67	0,0,0:c1	embryonic lethality, complete penetrance,embryonic lethality during organogenesis, complete penetrance
STAMBP	4.8	7.11	9.84	13.38	10.24	8.07	7.42	7.79	7.36	8.12	0,0,0:c1	probably-unrelated
SMG6	5.37	8.22	16.11	17.6	11.47	7.25	6.46	8.45	8.56	10.02	0,0,0:c1	embryonic lethality,embryonic lethality at implantation, incomplete penetrance
KLHL21	4.79	6.01	9.48	12.44	14.67	11.5	11.15	9.57	9.67	10.77	0,0,0:c1	probably-unrelated
CABIN1	4.96	6.68	12.33	14.26	2.76	2.51	1.34	1.74	2.99	2.11	0,0,0:c1	embryonic lethality during organogenesis, complete penetrance
SHE	1.7	3.74	3.73	5.56	1.63	1.77	1.33	1.35	0.93	1.15	0,0,0:c1	no-mutants
P2RY1	0.26	0.63	1.26	1.29	3.7	2.96	3.26	2.27	2.83	2.35	0,0,0:c1	probably-unrelated
ZFP407	2.26	3.18	5.76	6.52	1.75	1.18	1.12	1.28	1.43	1.25	0,0,0:c1	no-mutants
DDIT4L	1.95	2.3	5.78	6.86	3.93	5.26	3.37	2.86	3.14	2.98	0,0,0:c1	no-mutants
TRIM33	7	11.29	17.64	20.56	35.08	24.8	24.71	23.46	22.79	26.94	0,0,0:c1	embryonic lethality, incomplete penetrance,embryonic lethality between somite formation and embryo turning, complete penetrance,embryonic lethality between implantation and somite formation, complete penetrance
VPS9D1	3.25	5.27	8.31	10.26	6.22	5.93	4.24	4.77	4.28	3.37	0,0,0:c1	no-mutants
GTF2IRD1	12.44	23.42	35.07	40.72	13.58	11.75	11.1	10.11	10.04	8.52	0,0,0:c1	embryonic lethality during organogenesis, complete penetrance
PPP6R2	3	3.4	6.19	8.25	3.02	3.26	2.58	1.81	2.81	1.31	0,0,0:c1	probably-unrelated
TRIP12	24.54	35	50.04	60.85	32.76	23.18	24.6	24.46	24.98	24.98	0,0,0:c1	embryonic lethality during organogenesis, complete penetrance
DGKD	6.73	14.76	20.02	23.98	36.44	30.55	29.82	27.95	29.66	22.08	0,0,0:c1	probably-unrelated
DNAJC13	8.08	8.9	14.27	17.26	29	20.92	20.66	21.05	24.44	20.95	0,0,0:c1	no-mutants
ARHGAP21	4.92	3.71	6.99	9.7	12.5	8.73	8.75	9.67	10.77	7.84	0,0,0:c1	embryonic lethality between somite formation and embryo turning, complete penetrance
SYNJ1	1.16	1.15	2.59	2.98	4.21	4.52	3.21	3.23	3.09	3.13	0,0,0:c1	probably-unrelated
SEMA6C	2.51	12.16	21.93	22.69	12.72	13.26	8.85	10.55	10.67	6.26	0,0,0:c1	probably-unrelated
DSE	15.17	21.68	27.5	37.85	65.27	55.27	56.51	46.37	49.87	45.92	0,0,0:c1	probably-unrelated
PDS5B	11.74	12.4	22.01	27.35	16.34	12.63	13.31	11.56	14.8	10.82	0,0,0:c1	short limbs,abnormal long bone morphology
USP40	6.58	11.21	14.93	20.08	8.13	7.62	6.25	6.28	6.34	5.24	0,0,0:c1	no-mutants
DNM2	14.75	22.73	35.33	40.85	52.14	40.71	36.42	37.02	36.29	42.03	0,0,0:c1	embryonic lethality, complete penetrance,embryonic lethality prior to tooth bud stage
ASAP1	8.46	12.43	21.93	27.01	14.23	10.92	10.76	9.93	9.82	9.32	0,0,0:c1	no-mutants
IQCE	2.06	3.12	5.91	7.1	2.67	2.53	1.35	2.11	1.47	1.57	0,0,0:c1	probably-unrelated
RAB3A	2.12	3.4	6.48	7.31	1.05	0.68	0.55	1.09	0.92	0.56	0,0,0:c1	probably-unrelated
DCTN1	19.04	26.18	42.92	53.73	59.68	37.96	41.65	41.95	40.93	47.18	0,0,0:c1	embryonic lethality, complete penetrance
KCNQ5	0.49	0.53	0.58	1.06	11.3	6.42	8.95	8.41	6.77	8.23	0,0,0:c1	probably-unrelated
RAB3GAP1	5.61	8.88	14.04	17.7	26.07	20.68	17.41	17.65	18.13	18.63	0,0,0:c1	probably-unrelated
APCDD1	33.2	27.38	34.57	68.51	29.69	22.7	17.79	18.06	18.42	24.21	0,0,0:c1	no-mutants
TEC	1.27	1.02	1.34	2.84	1.1	1.4	1.12	0.92	0.81	0.5	0,0,0:c1	probably-unrelated
TBC1D9	0.81	1.89	3.32	4.15	5.5	5.07	3.7	4.11	3.6	2.73	0,0,0:c1	no-mutants
ARHGEF17	5.84	10.37	18.41	21.5	4.69	3.51	3.31	3.4	3.75	2.86	0,0,0:c1	no-mutants
MICAL3	2.33	2.01	3.99	5.25	14.14	7.86	9.54	9.99	11.16	11.38	0,0,0:c1	no-mutants
ANKRD11	9.77	6.43	15.9	20.85	8.99	8.21	5.92	6.67	8.23	4.17	0,0,0:c1	embryonic lethality during organogenesis, complete penetrance
FJX1	19.79	29.31	36.02	55.41	23.53	19.86	20.97	16.42	13.39	14.06	0,0,0:c1	probably-unrelated
HK1	6.21	12.59	25.92	30.83	49.75	37.91	40.7	32.1	28.63	29.43	0,0,0:c1	probably-unrelated
ZFP142	2.33	2.57	5.18	5.76	13.45	9.21	8.8	9.31	8.39	9.72	0,0,0:c1	probably-unrelated
RAB11FIP3	5.27	8.41	11.95	15.76	8.49	6.77	6.02	6.08	6	4.73	0,0,0:c1	no-mutants
TRAPPC10	3.46	5.69	10.37	11.78	13.76	9.98	8.66	8.7	9.57	10.15	0,0,0:c1	probably-unrelated
KIF21B	2.88	5.18	11.67	10.97	4.17	1.93	2.49	2.77	4.12	1.98	0,0,0:c1	probably-unrelated
ATG9A	4.7	9.44	12.88	17.69	1.82	1.71	1.03	1.42	1.18	0.72	0,0,0:c1	probably-unrelated
FBXW7	3.49	3.07	5.83	8.79	11.26	10.74	8.44	6.09	7.1	5.26	0,0,0:c1	embryonic lethality, complete penetrance,embryonic lethality during organogenesis, complete penetrance
MYO10	4.77	7.52	16.21	16.89	13.2	9.8	8.45	8.01	10.28	7.89	0,0,0:c1	abnormal digit morphology,fused phalanges,syndactyly
NACC2	0.41	0.89	1.55	1.78	4.68	3.87	3.63	2.52	3.38	3.13	0,0,0:c1	probably-unrelated
ATL3	5.37	10.35	16.9	25.82	1.02	1.54	1.48	0.41	0.69	0.45	0,0,0:c1	no-mutants
FCHSD1	0.76	1.35	2.5	3.27	7.19	7.77	5.48	4.65	5.08	3.44	0,0,0:c1	no-mutants
POMT1	4.85	7.27	8.86	12.4	8.96	5.65	6.63	5.99	6.53	6.08	0,0,0:c1	embryonic lethality during organogenesis, complete penetrance
SLTM	9.92	9.92	18.05	22.03	47.98	34.78	35.04	32.17	35.47	28.86	0,0,0:c1	no-mutants
FBXO10	3.27	5.75	8.8	11.01	54.96	44.85	42.71	36.28	35.91	33.22	0,0,0:c1	no-mutants
TMX4	4.12	11.23	17.51	18.86	17.74	10.02	13.9	11.63	11.2	13.38	0,0,0:c1	no-mutants
AMPD3	0.88	0.68	0.85	1.58	6.2	5.13	2.66	5.85	7.27	3.64	0,0,0:c1	probably-unrelated
PHRF1	11.85	12.07	20.7	24.98	13.97	8.75	9.6	10.09	9.93	10.28	0,0,0:c1	no-mutants
RPGRIP1L	2.9	3.14	3.94	5.61	21.61	11.22	13.24	14.89	17.3	15.02	0,0,0:c1	polydactyly,preaxial polydactyly
PREX1	3.56	9.22	14.28	15.12	12.66	9.34	9.3	9.17	11.41	7.15	0,0,0:c1	probably-unrelated
TBC1D32	1.15	1.55	2.22	2.88	7.12	5.96	5.63	5.22	4.36	3.61	0,0,0:c1	polydactyly,preaxial polydactyly
HDAC7	8.08	16.54	21.99	27.45	14.92	6.71	10.65	11.22	8.04	11.88	0,0,0:c1	embryonic lethality, complete penetrance,embryonic lethality during organogenesis, complete penetrance
SHANK1	0.17	0.16	0.47	1.12	6.26	5.12	3.77	3.18	1.85	1.93	0,0,0:c1	probably-unrelated
SYT13	0.32	2.08	5	7.71	1.47	0.96	1.14	0.81	0.63	0.74	0,0,0:c1	no-mutants
ZMAT1	0.59	1.23	2.13	3.54	3.67	2.55	2.41	2.12	1.92	1.8	0,0,0:c1	no-mutants
ELF4	0.65	2.19	3.46	6.22	3.43	1.95	2.33	1.78	1.26	2.03	0,0,0:c1	probably-unrelated
GPR27	0.73	1.43	3.4	5.89	3.63	1.81	2.8	2.28	1.78	1.4	0,0,0:c1	no-mutants
AMIGO2	1.05	2.47	3.28	7.05	1.51	1.04	1.23	1.05	0.81	0.27	0,0,0:c1	no-mutants
SLC8A1	1.01	1.81	2.2	4.57	6.34	3.03	4.04	3.19	3.16	4.35	0,0,0:c1	embryonic lethality, complete penetrance,embryonic lethality during organogenesis, complete penetrance
SULT4A1	0.75	0.92	0.93	2.7	4.64	2.94	3.5	2.99	2.75	1.38	0,0,0:c1	no-mutants
GRM7	0.01	0.01	0.13	1.59	2.85	2.13	1.65	1.45	1.34	1.82	0,0,0:c1	probably-unrelated
FGF11	0.29	0.39	1.22	4.22	5.51	4.89	4.75	2.36	3.18	1.24	0,0,0:c1	probably-unrelated
GRIN3A	0.07	0.21	0.72	1.93	3.96	1.84	1.88	2.08	2.42	1.77	0,0,0:c1	probably-unrelated
LRFN2	0.08	0.18	0.24	1.07	2.65	1.87	1.89	1.39	1.33	0.94	0,0,0:c1	probably-unrelated
SVEP1	0.68	0.71	1.97	4.76	18.21	11.63	10.48	9.05	9.28	7.68	0,0,0:c1	abnormal tail morphology,abnormal limb morphology
PTPRZ1	0.2	0.35	0.91	3.25	6.36	5.29	3.67	2.32	2.83	2.34	0,0,0:c1	probably-unrelated
TNC	3.21	2.13	10.87	32.82	35.43	22.75	26.07	19.68	13.73	9.76	0,0,0:c1	probably-unrelated
CACNA1H	0.28	0.89	4.95	7.89	13.47	7.35	7.54	7.39	6.98	4.79	0,0,0:c1	probably-unrelated
AATK	0.11	0.28	1.57	3.16	1.06	0.63	0.66	0.53	0.56	0.44	0,0,0:c1	probably-unrelated
NPY	0.06	0	0.42	1.92	1.26	0.87	0.45	0.9	0.68	0.58	0,0,0:c1	probably-unrelated
PSD	0.06	0.05	0.08	1.15	4.7	2.64	3.08	2.36	2.74	2.11	0,0,0:c1	no-mutants
ALDH1A3	0.04	0.06	0.93	5.44	1.11	0.31	0.84	0.67	0.18	0.71	0,0,0:c1	probably-unrelated
PROX1	0.32	0.32	1.55	5.54	3.25	2.07	1.98	1.31	1.87	1.22	0,0,0:c1	probably-unrelated
SRPK3	0.03	0.08	0.75	4.35	5.05	3.05	2.96	2.97	2.21	2.26	0,0,0:c1	probably-unrelated
DNM3	0.3	1.04	2.71	5.37	1.23	0.72	0.59	0.87	0.56	0.54	0,0,0:c1	probably-unrelated
SORCS1	0.04	0.1	0.49	1	4.65	2.18	2.13	2.48	3.03	1.45	0,0,0:c1	probably-unrelated
TOX2	0.28	0.46	0.7	1.82	26.34	17.92	19.93	15.39	12.86	8.61	0,0,0:c1	no-mutants
PCDH10	0.21	3.23	15.46	24.36	21.81	11.26	16.42	14.24	8.37	12.48	0,0,0:c1	probably-unrelated
PSD3	0.73	1.3	4.45	7.4	16.56	8.83	9.11	9.88	8.4	9.4	0,0,0:c1	no-mutants
ADGRL1	3.65	6.06	17.09	23.48	11.38	6.18	4.21	6.06	6	7.15	0,0,0:c1	probably-unrelated
GDF9	0.32	0.42	0.64	1.19	7.44	4.71	3.6	3.63	4.95	3.73	0,0,0:c1	probably-unrelated
CHST3	0.83	1.29	3.76	4.87	7.62	3.61	5.33	4.35	3.6	4.06	0,0,0:c1	probably-unrelated
NHSL2	1.38	2.68	6.4	8.68	5.29	3.36	2.5	2.51	3.27	2.96	0,0,0:c1	no-mutants
VCAN	12.22	27.09	51.21	80.24	87.11	49.41	51.68	63	54.94	27.35	0,0,0:c1	abnormal phalanx morphology,short limbs,abnormal digit morphology,embryonic lethality during organogenesis, complete penetrance,abnormal autopod morphology,embryonic lethality during organogenesis, incomplete penetrance
FGFR2	13.14	18.42	23.5	43.27	51.89	28.9	29.32	35.09	25.62	24.82	0,0,0:c1	abnormal limb development,absent hindlimb,abnormal appendicular skeleton morphology,absent forelimb,abnormal pelvic girdle bone morphology,embryonic lethality during organogenesis, complete penetrance,absent limbs,embryonic lethality between implantation and somite formation, complete penetrance
DCLK1	0.96	6.79	15.8	24.97	4.33	4.02	2.94	1.91	1.18	0.98	0,0,0:c1	probably-unrelated
MYO18A	3.05	4.95	10.57	14.98	9.53	5.84	5.37	5.96	6.52	4.51	0,0,0:c1	embryonic lethality prior to tooth bud stage
TMEM8B	0.61	2.14	5.31	7.04	5.19	3.76	2.8	2.69	3.4	2.6	0,0,0:c1	no-mutants
HSPA12A	0.54	0.69	1.46	2.12	4.99	2.82	2.91	3.28	2.57	2.69	0,0,0:c1	no-mutants
H6PD	2.14	5.26	8.13	13.66	5.21	3.28	3.03	2.69	2.88	3.18	0,0,0:c1	probably-unrelated
CCDC88A	2.46	2.18	5.02	9.31	13.12	6.52	5.98	7.28	7.04	7.39	0,0,0:c1	probably-unrelated
CCDC112	2.91	4.89	9.94	14.5	8.43	5.6	5.46	5.56	4.62	3.79	0,0,0:c1	no-mutants
PPP1R26	1.54	1.77	4.62	6.77	8.26	4.78	5.49	6.94	6.29	1.86	0,0,0:c1	probably-unrelated
SCAMP5	1.75	3.01	4.63	8.36	6.86	4.82	3.86	3.62	4.38	1.59	0,0,0:c1	no-mutants
SYNRG	2.82	3.82	7.04	10.27	7.1	5.3	4.37	4.35	4.74	3.75	0,0,0:c1	no-mutants
SNX32	0.21	0.52	0.89	1.39	22.28	15.73	0	16.14	16.51	13.12	0,0,0:c1	no-mutants
ACAN	0.04	0.06	0.71	1.86	1	0.83	0.42	0.43	0.49	0.07	0,0,0:c1	short limbs,abnormal limb development,brachydactyly,abnormal limb morphology
CD48	0	0.17	0.84	1.21	15.39	7.3	7.74	8.86	5.86	6.38	0,0,0:c1	probably-unrelated
PCDH17	0.45	1.79	3.17	5.23	5.18	3.48	3.11	2.78	1.93	2.25	0,0,0:c1	probably-unrelated
C1QTNF4	1.93	2.88	8.25	14.86	2.69	1.35	1.46	1.28	0.96	1.09	0,0,0:c1	probably-unrelated
KIF21A	0.81	0.64	1.98	3.59	11.69	6.79	5.87	4.31	6.59	4.03	0,0,0:c1	no-mutants
CACNA1C	0.34	0.73	2.42	3.65	28.72	18.18	13.02	13.3	15.98	15.64	0,0,0:c1	probably-unrelated
WNT10A	1.18	1.54	2.17	4.67	9.33	6.36	4.96	5	4.22	4.51	0,0,0:c1	probably-unrelated
PDZD4	1.8	3.21	7.3	15.09	5.99	3.49	3.94	2.31	1.55	1.97	0,0,0:c1	probably-unrelated
TBC1D8	0.79	1.34	2.54	4.97	7.63	5.16	3.65	3.42	3.97	3	0,0,0:c1	no-mutants
ARAP1	2.65	5.54	9.86	17.38	32	21.11	19.47	15.32	14.77	13.21	0,0,0:c1	probably-unrelated
ADAMTS8	0.12	0.12	0.4	2.92	16.62	11.86	7.8	4.92	4.11	6.92	0,0,0:c1	no-mutants
FZD9	0.3	0.08	2.46	5.93	39.76	21.95	19.54	15.95	14.11	10.2	0,0,0:c1	probably-unrelated
WNT3A	0.07	0.05	0.77	3.9	4.05	2.47	1.98	1.08	1.44	1.39	0,0,0:c1	hindlimb paralysis,absent hindlimb,sirenomelia,abnormal tail morphology,embryonic lethality during organogenesis, complete penetrance,embryonic lethality during organogenesis, incomplete penetrance
TRPM3	0.11	0.16	0.25	1.19	12.83	7.84	5.16	5.21	5.06	4.22	0,0,0:c1	probably-unrelated
CNTN1	0.01	0.05	0.56	1.6	10.19	6.82	5.62	4.19	4.22	3.43	0,0,0:c1	probably-unrelated
OGN	0	0.07	8.77	50.03	53.08	31.46	24.73	18.89	18.73	28.12	0,0,0:c1	probably-unrelated
GPR17	0.05	0.13	1.36	3.03	1.28	0.82	0.53	0.56	0.66	0.46	0,0,0:c1	probably-unrelated
KCNK13	0.04	0.11	1.05	2.7	1.84	1.14	0.84	0.74	0.63	0.82	0,0,0:c1	probably-unrelated
NOG	0.55	0.63	4.05	16.41	1.52	1.33	0.51	0.64	0.58	0.42	0,0,0:c1	short limbs,abnormal limb morphology
IRX6	0.05	0.07	0.93	3.27	2.84	1.75	1.77	1.19	0.76	0.53	0,0,0:c1	probably-unrelated
ATP9A	3.62	6.6	18.11	40.92	15.35	10.07	5.57	6.4	7.61	6.01	0,0,0:c1	no-mutants
PDGFRL	0.7	2.62	4.83	8.33	51.39	31.88	32.29	31.12	31.87	41.83	0,0,0:c1	no-mutants
4930402H24RIK	1.11	3.61	8.31	13.54	4.88	4.6	3.54	3.29	3.52	2.38	0,0,0:c1	probably-unrelated
RELL2	0.2	0.22	0.28	1.11	1.52	1.82	1.35	0.99	0.66	0.93	0,0,0:c1	no-mutants
CHD9	1.43	1.82	4.31	7.04	15.45	10.64	10.37	10.86	12.19	9.87	0,0,0:c1	probably-unrelated
FREM2	3.75	3.61	9.24	15.88	41.96	21.23	27.53	28.31	33.48	29.48	0,0,0:c1	polydactyly,preaxial polydactyly,syndactyly,oligodactyly,abnormal limb morphology,abnormal digit morphology,fused phalanges
RHOBTB1	3.34	6.62	12.77	21.41	7.74	6.27	6.07	5.19	5.9	5.01	0,0,0:c1	no-mutants
CNTLN	1.19	1.3	4.22	6.23	6.25	4.85	4.26	4.89	4.66	4.38	0,0,0:c1	no-mutants
EXPH5	0.08	0.2	0.43	1.01	6.03	4.79	3.09	3.53	5.8	2.88	0,0,0:c1	no-mutants
UNC93B1	0.52	2.3	3.74	6.82	16.47	8.59	10.69	11.02	10.44	13.3	0,0,0:c1	probably-unrelated
TAP1	0.39	1.35	2.1	3.73	11.9	7.07	9.16	8.58	8.44	7.25	0,0,0:c1	probably-unrelated
SIPA1L2	2.66	5.51	10.14	18.76	10.5	6.12	7.45	7.08	6.93	6.72	0,0,0:c1	no-mutants
LRSAM1	0.71	1.35	3.23	6.2	5.61	5.27	3.87	3.37	3.31	2.92	0,0,0:c1	probably-unrelated
HSD3B6	4.87	5.75	20.69	46.7	1.03	1	0.65	1.16	0.47	0.45	0,0,0:c1	no-mutants
MAP1A	0.49	0.48	1.61	2.84	96.72	57.96	64.35	59.54	64.82	76.95	0,0,0:c1	probably-unrelated
KIF5A	0.28	0.37	0.78	1.64	13.26	7.36	9.46	11.34	6.38	8.53	0,0,0:c1	hindlimb paralysis
PRKCA	0.56	0.92	2.48	4.43	92.79	51.18	61.03	59.71	60.15	65.4	0,0,0:c1	probably-unrelated
2900026A02RIK	2.26	2.45	4.69	10.71	27.81	23.94	18.3	17.32	22.72	13.47	0,0,0:c1	probably-unrelated
CTNNA2	0.34	0.55	1.21	2.43	1.38	0.97	1.16	0.98	0.42	0.9	0,0,0:c1	probably-unrelated
MRC1	0.06	1.1	2.93	7.03	2.34	2.17	1.64	1.65	1.05	1.14	0,0,0:c1	embryonic lethality between implantation and somite formation, complete penetrance
BAALC	0.19	0.46	1.86	5.85	1.18	0.47	0.7	0.68	0.96	0.79	0,0,0:c1	no-mutants
CSF1R	0.85	1.71	6.37	11.71	2.53	2.04	1.83	2.02	1.31	1.3	0,0,0:c1	short limbs,abnormal limb morphology
IL17RE	0.29	0.55	0.78	1.91	4.18	3.07	2.97	2.48	2.15	2.74	0,0,0:c1	probably-unrelated
IGDCC4	1.94	4.19	8.06	16.45	2.54	2.37	1.66	1.9	1.71	1.27	0,0,0:c1	no-mutants
ZFP827	1.27	2.43	6.68	13.79	6.65	6.14	4.29	4.72	4.62	3.8	0,0,0:c1	no-mutants
CLSTN3	0.56	1.51	4.39	7.42	16.56	13.53	10.34	12.02	11.91	9.93	0,0,0:c1	probably-unrelated
DMRT2	1.71	6.01	6.51	12.91	17.28	18.04	12.98	13.82	12.08	13.84	0,0,0:c1	probably-unrelated
RAVER2	2.58	5.37	11.87	16.09	35.99	29.94	30.91	26.51	26.5	24.58	0,0,0:c1	no-mutants
LPAR4	3.24	6.8	11.51	17.78	8.51	6.76	7.5	7.5	6.23	5.54	0,0,0:c1	probably-unrelated
TBCK	2.45	4.6	7.74	11.41	15.59	10.67	12.84	12.02	12.42	12.06	0,0,0:c1	no-mutants
PTPRB	0.23	0.42	0.81	1.12	21.7	17.7	16.12	16.66	18.67	16.19	0,0,0:c1	embryonic lethality during organogenesis, complete penetrance
ARID5B	2.35	4.4	14.41	16.82	24.1	20.89	19.88	18.15	17.42	19.53	0,0,0:c1	probably-unrelated
TRAM2	1.51	2.88	6.03	8.05	37.06	28.95	26.77	27.62	26.78	31.68	0,0,0:c1	abnormal ulna morphology,abnormal radius morphology
STEAP2	0.36	0.94	1.2	1.89	6.22	4.66	5.13	4.57	5.49	5.01	0,0,0:c1	no-mutants
CASZ1	0.16	0.2	0.95	1.62	2.74	6.23	3.01	3.23	3.73	2.85	0,0,0:c1	embryonic lethality during organogenesis, complete penetrance
RCOR3	2.16	2.98	5.33	7.96	29.42	25.09	24.44	22.42	22.59	21.45	0,0,0:c1	no-mutants
ARHGEF6	0.34	0.51	1.78	4.8	0.5	1.23	0.3	0.49	0.27	0.65	0,0,0:c1	probably-unrelated
ALDH1A2	24.47	20.53	34.73	135.22	8.21	17.93	6.21	2.8	3.37	11.4	0,0,0:c1	syndactyly,embryonic lethality, complete penetrance,small forelimb buds,abnormal digit morphology,absent forelimb buds,embryonic lethality during organogenesis, complete penetrance,absent hindlimb buds
MYO9A	1.62	2.07	4.74	7.35	15.86	11.76	12.31	11.96	12.04	12.06	0,0,0:c1	probably-unrelated
SPEF1	0.52	0.8	2.83	4.04	4.88	5.36	4.76	3.57	4.1	2.61	0,0,0:c1	probably-unrelated
STAB1	1.26	3.61	5.46	9.89	13.35	10.92	8.06	9.97	11.73	7.72	0,0,0:c1	probably-unrelated
ZFHX4	2.71	8.24	20.41	29.59	32.35	25.62	25.69	26.04	23.97	22.35	0,0,0:c1	no-mutants
PCDHAC2	0.01	0.07	0.81	2.41	0.51	1.04	0.55	0.54	0.6	0.41	0,0,0:c1	probably-unrelated
CDKN1C	141.53	369.89	774.81	1147	44.83	35.37	30.33	34.23	31.41	35.21	0,0,0:c1	short limbs,abnormal long bone morphology,abnormal humerus morphology,abnormal limb bone morphology
SMARCC2	10.09	18.32	40.33	56.69	9.58	7.7	7.44	7.28	7.51	6.93	0,0,0:c1	probably-unrelated
MAPRE3	1.97	3.78	6.78	10.53	7.33	6.37	5.57	4.25	5	5.9	0,0,0:c1	probably-unrelated
FRAS1	1.42	3.05	5.88	8.53	48.36	33.06	40.27	36.31	38.39	28.18	0,0,0:c1	abnormal digit morphology,preaxial polydactyly,syndactyly
SEMA6D	1.58	2.35	3.94	6.46	24.31	14.91	17.84	17.74	17.52	18.99	0,0,0:c1	no-mutants
FLNB	6.9	10.75	35.84	45.76	88.96	65.5	67.23	62.24	67.57	54.39	0,0,0:c1	short limbs,abnormal radius morphology,abnormal ulna morphology,abnormal limb bone morphology,embryonic lethality during organogenesis, incomplete penetrance
ERBB2	6.69	13.06	24.77	37.19	21.63	15.85	17.11	14.6	15.95	16.12	0,0,0:c1	embryonic lethality, complete penetrance,embryonic lethality during organogenesis, complete penetrance
MILR1	0.18	0.39	0.99	1.73	2.11	2.9	2.1	2.27	1.7	0.63	0,0,0:c1	probably-unrelated
LARGE1	3.6	8.18	10.56	18.42	11.49	7.8	9.68	8.59	7.38	9.09	0,0,0:c1	probably-unrelated
ZFP318	2.5	2.96	6.99	9.64	33.65	25.51	22.82	24.52	28.68	24.45	0,0,0:c1	probably-unrelated
SLC27A1	1.18	2.61	4.86	6.93	29.12	18.25	24.49	23.67	21.34	21.43	0,0,0:c1	probably-unrelated
KLF8	0.24	0.56	1.63	2.44	5.79	4.5	3.81	3.08	6.18	3.01	0,0,0:c1	probably-unrelated
BRDT	0.26	0.28	1.23	1.93	3.55	2.84	1.7	1.86	3.12	2.52	0,0,0:c1	probably-unrelated
PAQR8	1.13	2.99	5.22	8.33	3.74	2.2	3.34	3.04	2.16	2.28	0,0,0:c1	no-mutants
DIP2A	1.51	3.8	6.83	9.86	25.09	17.38	20.14	19.42	18.84	17.91	0,0,0:c1	no-mutants
SEMA4G	1.31	2.98	7.52	9.84	10.29	9.23	8.33	7.56	7.7	6.75	0,0,0:c1	probably-unrelated
TOX3	1.78	3.07	6.56	9	2.77	1.98	1.15	1.85	2.13	2.18	0,0,0:c1	probably-unrelated
PENK	1.07	1.73	11.53	30.11	1.94	2.77	1.57	1.63	0.72	0.46	0,0,0:c1	probably-unrelated
4932438A13RIK	1.29	0.9	2.2	3.48	40.8	27.4	27.87	29.06	31.52	27.21	0,0,0:c1	probably-unrelated
APC	4.43	3.15	7.97	12.73	21.35	14.96	15.24	14.81	16.28	13.9	0,0,0:c1	abnormal limb development,embryonic lethality, complete penetrance,abnormal humerus morphology,abnormal forelimb morphology,embryonic lethality between implantation and placentation,embryonic lethality during organogenesis, complete penetrance,embryonic lethality between implantation and somite formation, incomplete penetrance,embryonic lethality,embryonic lethality between implantation and somit…
GNAO1	0.71	1.06	1.61	2.94	43.43	33.24	26.69	30.95	30.44	29.52	0,0,0:c1	probably-unrelated
AAK1	1.62	3.07	6.39	8.87	43.27	31.94	31.74	28.72	31.65	27.37	0,0,0:c1	probably-unrelated
PAM	8.01	10.74	27.65	35.14	36.73	24.27	24.08	23.49	26.6	28.22	0,0,0:c1	probably-unrelated
INVS	1.79	2.01	4.12	5.69	5	3.5	3.56	3.5	3.2	3.88	0,0,0:c1	probably-unrelated
LNX2	2.88	5.75	9.26	12.97	1.45	1.1	1.04	0.97	1.15	0.98	0,0,0:c1	no-mutants
KLHDC8B	1.38	2.48	6.01	9.49	3.07	2.97	2.74	1.66	1.89	1.38	0,0,0:c1	no-mutants
ZEB1	7.6	9.46	17.29	24.86	12.41	9.07	8.63	9.18	8.28	9.27	0,0,0:c1	abnormal phalanx morphology,short limbs,syndactyly,embryonic lethality between somite formation and embryo turning, complete penetrance,abnormal hindlimb morphology,embryonic lethality during organogenesis
DOCK4	0.94	1.07	2.2	3.43	4.44	3.91	3.84	3.02	3.56	1.89	0,0,0:c1	embryonic lethality, complete penetrance
PRRC2B	15.68	25.43	51.3	66.63	31.52	20.5	23.67	22.46	24.28	20.93	0,0,0:c1	probably-unrelated
KMT2E	4.6	4.94	14.03	20.5	2.47	2.87	1.78	2.13	1.94	1.67	0,0,0:c1	probably-unrelated
PCDH8	0.09	0.54	1.63	2.22	55.2	32.99	43.68	38.86	36.81	39.93	0,0,0:c1	probably-unrelated
LRRC15	0.2	0.21	1.16	1.49	4.56	2.72	3.13	2.93	3.14	3.08	0,0,0:c1	probably-unrelated
FAM13A	0.5	0.89	1.98	2.85	8.4	6.88	6.12	6.29	5.38	5.43	0,0,0:c1	no-mutants
DENND3	0.13	0.43	0.9	1.41	11.01	7.75	6.71	8.18	7.14	8.25	0,0,0:c1	no-mutants
CXXC4	0.34	1.23	3.54	4.87	2.57	2.37	1.62	1.7	1.83	1.49	0,0,0:c1	no-mutants
PPARGC1B	0.27	0.37	0.46	1.13	14.29	10.25	8.01	10.03	10.66	9.3	0,0,0:c1	probably-unrelated
ANKRD13D	0.58	1.31	2.23	3.55	19.1	11.62	11.91	12.08	10.84	16.04	0,0,0:c1	probably-unrelated
TRIO	3.72	5.41	14.69	20.66	9.6	6.44	5.78	6.89	6.56	7.11	0,0,0:c1	probably-unrelated
ROBO1	6.44	9.42	24.49	37.85	20.49	10.71	11.61	12.53	12.72	15.32	0,0,0:c1	probably-unrelated
PLEKHH2	0.78	1.32	2.88	4.36	3.49	2.99	2.43	2.21	2.29	2.27	0,0,0:c1	no-mutants
9930021J03RIK	1.97	2.26	5.16	7.58	6.78	4.72	4.91	4.39	4.84	4.84	0,0,0:c1	no-mutants
DDX58	0.68	1.14	1.69	3	8.53	9.01	6.46	5.75	6.79	5.5	0,0,0:c1	embryonic lethality during organogenesis, incomplete penetrance
FKBP15	3.44	3.54	7.51	10.09	18.23	12.87	13.26	14.1	13.29	15.56	0,0,0:c1	no-mutants
MEGF6	6.59	15.79	25.71	34.91	45.51	36.35	35.55	36.25	30.29	33.69	0,0,0:c1	no-mutants
CLSTN2	0.06	0.32	1.86	4.59	0.75	1.21	1.53	0.69	0.38	0.6	0,0,0:c1	probably-unrelated
SETD2	6.99	6.98	15.05	21.15	18.88	12.66	13.17	15.2	14.56	13.49	0,0,0:c1	embryonic lethality during organogenesis, complete penetrance
HAP1	0.23	0.4	0.69	1.12	1.49	1.42	0.89	1.07	0.98	0.98	0,0,0:c1	probably-unrelated
NEDD9	3.52	4.67	8.9	14.95	8.4	6.73	6.53	6.56	5.68	4.69	0,0,0:c1	probably-unrelated
GGT7	0.41	0.8	1.54	2.43	3.28	3.31	2.43	2.38	1.3	1.87	0,0,0:c1	no-mutants
KAT6A	6.34	7.81	18.47	26.04	50.32	33.22	35.74	36.18	36.19	38.67	0,0,0:c1	abnormal tail morphology
ZFP532	4.85	9.19	18.4	25.9	4.44	3.63	3.2	3.02	3.77	2.85	0,0,0:c1	no-mutants
TENM3	6.62	12.32	24.8	34.23	70.73	50.36	59.01	54.84	53.23	43.78	0,0,0:c1	probably-unrelated
GRAMD1B	0.67	0.59	1.53	2.27	2.37	2.22	1.76	1.71	1.69	1.56	0,0,0:c1	no-mutants
DEPTOR	0.11	0.12	0.59	2.1	8.96	6.94	6.36	5.29	5.12	4.85	0,0,0:c1	no-mutants
ADAMTS5	1.15	0.39	1.98	6.79	3.51	3.47	1.76	2.14	1.91	2.04	0,0,0:c1	interdigital webbing,syndactyly
P2RY12	0.01	0.05	0.69	1.62	82.06	74.93	52.19	44.92	46.96	38.76	0,0,0:c1	probably-unrelated
VEPH1	0.13	0.14	0.46	1.04	6.38	5.16	3.11	4.07	4.47	2.81	0,0,0:c1	probably-unrelated
NTNG1	0.53	0.67	1.54	2.55	6.17	3.94	4.63	3.98	3.39	4.03	0,0,0:c1	no-mutants
EEA1	1.08	0.49	1.51	3.71	35.46	21.4	19.14	21.48	23.01	23.92	0,0,0:c1	no-mutants
ADAMTS14	0.17	0.24	0.42	1.05	11.36	5.09	5.44	5.98	6.66	7.99	0,0,0:c1	no-mutants
GAS6	1.22	2.15	4.7	9.45	38.88	23.38	24.88	23.32	21.87	26.5	0,0,0:c1	probably-unrelated
AMBN	0.05	0.09	1.16	2.63	95.75	38.71	42.74	59.29	70.49	47.6	0,0,0:c1	probably-unrelated
GPR88	0	0.31	0.31	1.54	4.31	4.16	3.11	2.44	2.57	1	0,0,0:c1	no-mutants
FAM184A	0.36	0.3	0.94	2.17	4.34	3.8	2.26	2.44	2.64	1.65	0,0,0:c1	no-mutants
A2M	2.93	0.43	1.07	6.83	26.97	12.96	17.55	15.32	17.54	16.51	0,0,0:c1	no-mutants
TCF20	5.58	4.12	10.99	18.38	37.81	21.95	23.62	24.97	22.53	26.98	0,0,0:c1	no-mutants
KREMEN2	5.48	7.73	11.05	25.67	1.07	0.69	0.74	0.63	0.64	0.55	0,0,0:c1	probably-unrelated
PAQR4	1.5	3.82	5.1	10.76	8.92	4.14	4.26	5.61	5.07	6.94	0,0,0:c1	no-mutants
SCAPER	1.77	1.64	4.12	6.92	4.81	3.26	3.2	3.05	2.82	3.1	0,0,0:c1	no-mutants
TRAF5	1.36	1.55	4.54	8.3	2.12	1.94	1.34	0.98	1.42	0.93	0,0,0:c1	probably-unrelated
CC2D1A	4.17	3.98	7.65	12.71	12.23	7.05	8.32	9.9	7.22	8.07	0,0,0:c1	probably-unrelated
KLHL29	1.13	2.42	4.56	6.91	37.62	23.32	24.99	25.65	22.91	25.62	0,0,0:c1	probably-unrelated
LRP1	4.67	6.8	13.98	20.24	45.79	17	25.65	36.76	33.04	33.83	0,0,0:c1	embryonic lethality during organogenesis, complete penetrance,embryonic lethality prior to tooth bud stage
SRGAP1	1.45	2.56	7.15	10.23	12.05	6.91	6.69	7.13	6.87	9.88	0,0,0:c1	no-mutants
GPR137C	0.11	0.23	0.99	1.53	3.94	3.87	2.43	2.4	2.14	1.89	0,0,0:c1	no-mutants
GDF6	1.5	2.98	3.64	7.4	16.49	13.01	11.09	9.75	10.43	10.48	0,0,0:c1	probably-unrelated
CIC	8.25	13.38	25.88	40.27	55.43	30.18	32.64	37.45	31.32	42.46	0,0,0:c1	probably-unrelated
LAMB1	14.46	21.07	37.63	61.11	107.61	64.93	70.15	69.5	65.67	66.2	0,0,0:c1	embryonic lethality between implantation and somite formation, complete penetrance
C130074G19RIK	1.74	3.21	6.45	11.77	1.22	0.81	1.2	0.97	0.55	0.33	0,0,0:c1	no-mutants
RRBP1	19.81	14.63	34.48	63.35	5.97	3.16	3.18	4.56	3.78	3.51	0,0,0:c1	no-mutants
NUAK1	1.86	3.82	10.91	17.08	1.41	0.81	0.69	1.12	0.57	0.89	0,0,0:c1	probably-unrelated
VWCE	0.19	0.43	0.93	1.82	4.05	2.92	2.59	2.81	2.2	1.42	0,0,0:c1	no-mutants
TSHZ1	10.89	5.96	21.04	35.97	10.31	6.27	6.08	5.69	6.06	6.19	0,0,0:c1	probably-unrelated
DIAPH2	0.36	0.61	1.31	2.01	2.47	2.01	1.6	1.67	1.26	1.38	0,0,0:c1	probably-unrelated
FGF9	0.29	0.51	2.79	3.36	6.04	5.17	3.15	3.05	3.73	3.6	0,0,0:c1	abnormal limb development,abnormal long bone morphology,short limbs,abnormal radius morphology,embryonic lethality prior to tooth bud stage,abnormal humerus morphology
ANKRD12	0.52	0.37	0.92	1.48	13.02	9.49	8.19	8.38	9.2	7.93	0,0,0:c1	no-mutants
INPP5D	0.29	1.07	2.04	2.87	3.09	2.35	1.36	2.29	1.35	2.2	0,0,0:c1	abnormal long bone morphology
COL24A1	0.17	0.12	0.37	1.36	26.85	14.98	14.11	16	15.92	22.85	0,0,0:c1	probably-unrelated
TCP11L2	0.77	1.23	4.99	10.1	6.11	6.59	6.06	5.54	5.34	3.61	0,0,0:c1	no-mutants
SEMA5B	0.39	0.42	2.03	3.51	12.57	8.57	13	11.59	10.34	7.67	0,0,0:c1	probably-unrelated
[truncated: 18,633 more rows]
